# Supplementary material for: Introducing the municipal digital offering index for evaluating online services and addressing the digital divide
Source: PeerJ Comput Sci. 2025 Sep 3;11:e3049. doi: 10.7717/peerj-cs.3049 (PMC12453795; doi:10.7717/peerj-cs.3049)
Supplement: Supplemental Information 4 [file peerj-cs-11-3049-s004.xlsx]

## Sheet: Base sin Vacios
Región	Provincia	Comuna	Número de región	Zona	Indice_5	Tamaño	Cantidad_Poblacional	%_POBREZA_POR_INGRESO	%_POBLACIÓN_URBANA	%_SIN_ESCOLARIDAD	%_BÁSICA	%_MEDIA	%_SUPERIOR	%_NIVEL_IGNORADO	BIENESTAR	ECONOMÍA	EDUCACIÓN	IDC	Porcentaje de Ejecución Presupuestaria Devengada Municipal (2021)	Eficiencia Cobro Patentes Municipales en %	Gastos en Personal Municipal (M$)	Gastos Municipales (Gastos Total Devengado) (M$)	Disponibilidad Presupuestaria Municipal por Habitante en M$	Ingresos Municipales (Ingreso Total Percibido) en M$	Ingresos por Impuestos en M$	Ingresos por Patentes Municipales de Beneficio Municipal en M$	Ingresos por Permisos de Circulación de Beneficio Municipal en M$	Ingresos por Fondo Común Municipal en M$	Nº de Permisos de Edificación Entregados	N° de Permisos de edificación entregados al nivel regional	Disponibilidad presupuestaria municipal por habitante en M$ al nivel regional
Región del Bío-Bío	Biobío	Alto Biobío	8	Centro	0.247341	2125	5923	0.289731	0	0.216444	0.533176	0.177106	0.0381563	0.0351173	0.2206	0.0369	0.489	0.1584	90.91	97.14	1679820	3213131	450.3	3057091	485267	330178	101828	2053144	200	2920	10796.8
Región de Atacama	Huasco	Alto Del Carmen	3	Norte	0.364702	5939	5299	0.124749	0	0.136063	0.44348	0.305341	0.0649179	0.0501982	0.6876	0.0497	0.5419	0.2647	61.23	80.7	1218654	3671521	651.07	3746256	231811	23313	151099	2149651	25	419	4320.73
Región de Tarapacá	Iquique	Alto Hospicio	1	Norte	0.0831893	573	108375	0.161034	0.977015	0.141121	0.398072	0.355682	0.0600507	0.045075	0.8664	0.1183	0.6803	0.4115	93.18	95.05	6629130	21182999	156.52	20986969	2576751	977676	543094	9149769	68	275	7038.5
Región de Los Lagos	Chiloé	Ancud	10	Sur	0.474368	1752	38991	0.120515	0.724911	0.101947	0.476956	0.281783	0.0968942	0.04242	0.6989	0.1478	0.7046	0.4175	93.74	52.4	4200168	20838515	496.53	21099355	1282947	511653	344060	6572481	318	3026	14306.6
Región de Coquimbo	Elqui	Andacollo	4	Centro	0.265302	310	11044	0.111688	0.906193	0.127943	0.450199	0.352137	0.0578595	0.0118616	0.7962	0.0531	0.6483	0.3016	71.93	79.47	1964107	3548557	311.16	3677240	745263	535371	151712	2092954	67	1588	6204.9
Región de La Araucanía	Malleco	Angol	9	Sur	0.484527	1194	53262	0.148623	0.91831	0.122395	0.423473	0.313019	0.115129	0.0259848	0.8443	0.1347	0.7862	0.4471	70.3	92	4861410	12003352	253.63	14276715	1603531	346718	534906	8053397	86	6266	10810.4
Región de Antofagasta	Antofagasta	Antofagasta	2	Norte	0.585182	30718	361873	0.081585	0.978531	0.106073	0.3043	0.37299	0.17791	0.0387263	0.9261	0.3383	0.7536	0.618	82.32	63.11	15908744	112518273	263.41	114241945	32864954	13722240	4604571	10196473	200	602	17070.9
Región del Bío-Bío	Biobío	Antuco	8	Centro	0.424595	1884	4073	0.147454	0.509943	0.112202	0.498404	0.279155	0.0748834	0.0353548	0.7123	0.0477	0.5859	0.271	72.74	90.09	1313372	3556259	879.57	3792706	367736	24112	274382	2644005	29	2920	10796.8
Región del Bío-Bío	Arauco	Arauco	8	Centro	0.435961	956	36257	0.130476	0.75351	0.121108	0.448189	0.295584	0.0956781	0.0394407	0.7777	0.1412	0.7678	0.4384	62.74	80.51	3404324	9063207	263.9	10230969	1473277	510196	395162	5555600	114	2920	10796.8
Región de Arica y Parinacota	Arica	Arica	15	Norte	0.385762	4799	221364	0.11756	0.926433	0.11327	0.325193	0.377631	0.144915	0.0389901	0.8896	0.2322	0.763	0.5401	72.32	81.28	19930204	43116505	181.53	45526363	9371852	3632965	1304277	21297492	102	103	3620.44
Región de Aysén del Gral. Ibáñez del Campo	Aysén	Aysén	11	Sur	0.53561	29796	23959	0.0692115	0.847615	0.123878	0.460579	0.291122	0.107016	0.0174047	0.8844	0.1904	0.6791	0.4854	84.18	82.93	4363926	8363558	351.47	8816639	1243470	654689	178853	4764353	164	758	14502.9
Región Metropolitana de Santiago	Maipo	Buin	13	Centro	0.356665	214	96614	0.0850969	0.858168	0.119869	0.381208	0.321879	0.145859	0.031186	0.891	0.1671	0.7361	0.4785	86.77	58.93	6230080	29182861	277.47	31058736	6276523	2310868	1318677	3358995	47	3502	13144.3
Región de Ñuble	Diguillín	Bulnes	16	Centro	0.353776	425	21493	0.153584	0.627693	0.11078	0.496766	0.285302	0.0820732	0.0250779	0.7638	0.0914	0.664	0.3592	77.44	100	2099743	5580058	246.22	5580582	847190	358809	208165	3331687	70	2469	8760.34
Región de Valparaíso	Petorca	Cabildo	5	Centro	0.516883	1455	19388	0.0860994	0.627863	0.125954	0.46405	0.302868	0.069837	0.0372911	0.8497	0.1033	0.6851	0.3917	73.54	41.77	1981809	4857306	235.65	4881526	660643	250406	231350	2779928	51	2714	16976.3
Región de Magallanes y Antártica Chilena	Antártica Chilena	Cabo De Hornos	12	Sur	0.409292	21551	2063	0.0313887	0.908386	0.127969	0.313621	0.359186	0.184682	0.0145419	0.9537	0.0766	0.642	0.3606	70.11	80.19	1309030	2983414	1726.34	3423328	242273	229629	12644	2721354	4	897	29091.7
Región del Bío-Bío	Biobío	Cabrero	8	Centro	0.377221	640	28573	0.133722	0.754699	0.118223	0.46411	0.316173	0.0746859	0.0268085	0.8034	0.1222	0.6892	0.4074	77.78	81.4	2546669	9399138	307.92	9496968	1379552	593494	319227	5481540	96	2920	10796.8
Región de Antofagasta	El Loa	Calama	2	Norte	0.177046	15597	165731	0.105725	0.956291	0.11156	0.305477	0.383634	0.147003	0.0523258	0.8869	0.2503	0.7598	0.5525	78.92	85.01	8526607	51809132	279.12	53965143	11884070	4572629	1979377	6345398	285	602	17070.9
Región de Los Lagos	Llanquihue	Calbuco	10	Sur	0.388223	591	33985	0.113044	0.470678	0.10896	0.548065	0.244932	0.0628513	0.035192	0.6232	0.083	0.6603	0.3244	73.98	89.51	2361542	7644771	212.18	7850030	1560776	1003096	232522	4190399	41	3026	14306.6
Región de Atacama	Copiapó	Caldera	3	Norte	0.261714	4667	17662	0.102063	0.893161	0.115049	0.383762	0.352112	0.0985732	0.0505039	0.8466	0.0901	0.6406	0.3656	86.84	72.3	5822007	11016924	557.71	10937812	1208537	416877	442720	6568221	29	419	4320.73
Región de Valparaíso	Quillota	Calera	5	Centro	0.414205	61	50554	0.133316	0.962693	0.11101	0.404558	0.360051	0.0966887	0.0276932	0.8682	0.1691	0.7363	0.4764	87.32	46.09	3731079	10431104	190.31	10226649	2223223	1228610	361610	5382906	284	2714	16976.3
Región de Valparaíso	Los Andes	Calle Larga	5	Centro	0.400068	322	14832	0.114747	0.720806	0.119471	0.393339	0.338592	0.103358	0.04524	0.8104	0.0784	0.7095	0.3559	82.93	76.15	1777102	9723270	697.27	11716951	3509617	107696	3177491	1889861	9	2714	16976.3
Región de Tarapacá	Tamarugal	Camiña	1	Norte	0.210522	2200	1250	0.228345	0	0.1576	0.4576	0.2336	0.0632	0.088	0.4806	0.0438	0.6085	0.2339	58.15	78.95	931766	2709588	1720.95	2381797	9622	2835	6599	1976276	0	275	7038.5
Región de Coquimbo	Choapa	Canela	4	Centro	0.205737	2197	9093	0.146292	0.21555	0.147806	0.567799	0.210711	0.0555372	0.0181458	0.523	0.0283	0.5978	0.2069	86.67	90.11	1350938	4002859	385.8	3683573	482558	269834	130476	2182773	47	1588	6204.9
Región del Bío-Bío	Arauco	Cañete	8	Centro	0.430006	760	34537	0.186184	0.564438	0.131801	0.493239	0.252251	0.0854156	0.0372933	0.7145	0.1126	0.6925	0.382	74.4	67.03	2506736	7706747	243.83	9055670	736932	179361	298419	6208058	254	2920	10796.8
Región de La Araucanía	Cautín	Carahue	9	Sur	0.398385	1341	24533	0.228727	0.540211	0.132026	0.525455	0.244283	0.0547834	0.0434517	0.5831	0.0524	0.6181	0.2662	84.67	69.68	3578616	7021208	310.43	7917418	363212	75267	155299	5692155	219	6266	10810.4
Región de Valparaíso	San Antonio	Cartagena	5	Centro	0.474271	246	22738	0.184373	0.916791	0.103175	0.419034	0.347348	0.078327	0.0521154	0.8513	0.0817	0.6535	0.3568	62.63	86.64	4505135	12645882	511.93	13215520	687520	262359	130762	10788076	33	2714	16976.3
Región de Valparaíso	Valparaíso	Casablanca	5	Centro	0.557882	953	26867	0.0960422	0.670041	0.110135	0.398295	0.339785	0.117505	0.03428	0.8469	0.1338	0.7241	0.4346	65.14	79.3	3319551	11010344	361.42	10682139	5814615	4020084	480087	1910028	73	2714	16976.3
Región de Los Lagos	Chiloé	Castro	10	Sur	0.354657	473	43807	0.0900534	0.777136	0.103545	0.426827	0.306937	0.130208	0.0324834	0.8104	0.195	0.7076	0.4818	84.91	75.93	5181911	27065376	573.48	27489128	2654396	1449060	329020	9546616	329	3026	14306.6
Región del Maule	Cauquenes	Cauquenes	7	Centro	0.296115	2126	40441	0.130852	0.818823	0.121016	0.48478	0.269652	0.0876833	0.0368685	0.7719	0.1302	0.6869	0.4102	81.3	84.59	2874925	8842429	223	9868221	962325	180350	323177	6560430	65	3202	11350.2
Región Metropolitana de Santiago	Santiago	Cerro Navia	13	Centro	0.356665	11	132622	0.129223	1	0.109771	0.438849	0.351141	0.0595678	0.040672	0.8996	0.0942	0.6143	0.3734	92.41	70.15	10427757	43134055	285.23	40589738	1223140	378496	516086	16751064	112	3502	13144.3
Región de Los Lagos	Palena	Chaitén	10	Sur	0.261407	8471	5071	0.103203	0.323999	0.0881483	0.517452	0.255965	0.120883	0.0175508	0.6078	0.1127	0.5693	0.3392	85.39	91.37	1695707	4728661	811.27	4083147	308832	218711	36026	2076458	41	3026	14306.6
Región del Maule	Cauquenes	Chanco	7	Centro	0.357213	530	8928	0.157287	0.43918	0.117384	0.593414	0.207885	0.0565636	0.0247536	0.5545	0.0428	0.5465	0.2349	97.82	66.99	1502070	3845657	398.36	3712361	228484	23475	143298	2481792	12	3202	11350.2
Región de Atacama	Chañaral	Chañaral	3	Norte	0.304696	5772	12219	0.101701	0.90703	0.126442	0.419183	0.35543	0.0864228	0.0125215	0.8379	0.0977	0.6094	0.3681	80.94	88.47	2755854	8513287	718.94	9453373	1077931	762430	203410	2200736	14	419	4320.73
Región del Libertador Bernardo O'Higgins	Colchagua	Chépica	6	Centro	0.39458	503	15037	0.139365	0.574982	0.126621	0.519851	0.262353	0.0675002	0.0236749	0.8401	0.0608	0.6013	0.3132	87.11	94.41	1482676	4052627	268.16	4291378	461401	37493	182686	2556790	43	1802	12925
Región del Bío-Bío	Concepción	Chiguayante	8	Centro	0.516603	72	85938	0.10874	0.999127	0.098606	0.334834	0.339861	0.200074	0.0266238	0.929	0.2072	0.7712	0.5295	85.04	69.17	6420111	20518505	222.94	20384279	3837195	471612	2020297	9879076	64	2920	10796.8
Región de Aysén del Gral. Ibáñez del Campo	General Carrera	Chile Chico	11	Sur	0.261407	5737	4865	0.0635791	0.649949	0.105447	0.458171	0.264954	0.123535	0.0478931	0.8842	0.1216	0.5821	0.397	70.58	84.86	1910802	3924433	939.36	4826432	301653	158944	43832	3091646	86	758	14502.9
Región de Ñuble	Diguillín	Chillán	16	Centro	0.449391	511	184739	0.137137	0.912893	0.102626	0.361878	0.330082	0.17738	0.0280341	0.8707	0.2278	0.7729	0.5352	68.96	76.47	12945605	35924036	258.67	51772329	9767245	3173651	1644676	17317943	62	2469	8760.34
Región de Ñuble	Diguillín	Chillán Viejo	16	Centro	0.166012	292	30907	0.145927	0.886822	0.114667	0.398	0.346103	0.114828	0.0264018	0.8153	0.1023	0.6479	0.378	75.5	66.42	1983118	6140314	191.2	6560214	1153462	325864	396106	3517277	38	2469	8760.34
Región del Libertador Bernardo O'Higgins	Colchagua	Chimbarongo	6	Centro	0.401269	498	35399	0.106776	0.578717	0.115907	0.51702	0.279669	0.0662448	0.0211588	0.8131	0.0784	0.6811	0.3515	70.37	79.67	2769852	7131718	238.08	9031567	1518338	558280	342544	4429374	143	1802	12925
Región de La Araucanía	Cautín	Cholchol	9	Sur	0.448355	428	11611	0.233163	0.375161	0.145466	0.4941	0.246663	0.0534838	0.0602877	0.3722	0.0288	0.5922	0.1851	84.55	88.97	2137853	4314613	386.33	4800899	363503	56125	250461	2930198	254	6266	10810.4
Región de Los Lagos	Chiloé	Chonchi	10	Sur	0.354657	1362	14858	0.132416	0.384574	0.0971194	0.550007	0.2394	0.075111	0.0383632	0.596	0.1049	0.7047	0.3532	85.34	88.14	2234626	10832097	669.41	10772094	1283028	887217	126190	2799537	34	3026	14306.6
Región de Aysén del Gral. Ibáñez del Campo	Aysén	Cisnes	11	Sur	0.360311	16093	6517	0.0830811	0.631272	0.0988185	0.476139	0.281571	0.119994	0.0234771	0.8677	0.2004	0.6225	0.4766	62.56	87.74	2455346	4478565	998.59	5836750	466000	317724	54674	1953712	20	758	14502.9
Región de Ñuble	Itata	Cobquecura	16	Centro	0.261816	570	5012	0.191626	0.289904	0.0989625	0.590383	0.2083	0.0903831	0.0119713	0.4081	0.0325	0.5775	0.1971	92.57	94.15	1365126	4268300	722.15	3802132	236265	26168	122576	2658897	57	2469	8760.34
Región de Aysén del Gral. Ibáñez del Campo	Capitán Prat	Cochrane	11	Sur	0.380519	8500	3490	0.0982628	0.81404	0.144699	0.413181	0.274785	0.126648	0.0406877	0.8613	0.1415	0.5974	0.4176	64.8	84.27	1261296	2965645	781.89	2896136	160970	76156	37267	1805528	19	758	14502.9
Región del Libertador Bernardo O'Higgins	Cachapoal	Codegua	6	Centro	0.376801	287	12988	0.13015	0.540422	0.11295	0.477672	0.306052	0.078534	0.0247921	0.8775	0.0952	0.5792	0.3644	93.17	96.05	1588410	3820466	272.41	3881061	666297	117482	249474	1784263	31	1802	12925
Región de Ñuble	Itata	Coelemu	16	Centro	0.179785	342	15995	0.126028	0.714911	0.1191	0.490841	0.274086	0.0869647	0.0290091	0.6765	0.1084	0.6992	0.3715	77.48	87.49	2149630	5216791	315.52	5323103	426800	148386	164122	3842385	86	2469	8760.34
Región de Ñuble	Punilla	Coihueco	16	Centro	0.200947	1777	26881	0.166851	0.338455	0.125442	0.540679	0.240579	0.0653993	0.0279007	0.6906	0.0578	0.6514	0.2963	61.35	96.87	1863553	7163527	306.03	8742887	788995	75578	269684	6390144	244	2469	8760.34
Región del Libertador Bernardo O'Higgins	Cachapoal	Coinco	6	Centro	0.439986	98	7359	0.131899	0.465281	0.0989265	0.489061	0.295421	0.0963446	0.0202473	0.7837	0.0654	0.5631	0.3068	74.45	96.24	1054013	2748253	356.9	2816269	390100	194256	124274	1686828	30	1802	12925
Región del Maule	Linares	Colbún	7	Centro	0.38475	2900	20765	0.147582	0.435926	0.115386	0.52391	0.264676	0.0600048	0.0360222	0.7643	0.0559	0.5864	0.2926	91.83	69.28	1520351	10592688	452.4	10320642	2667597	482167	1765725	3640130	167	3202	11350.2
Región de Tarapacá	Tamarugal	Colchane	1	Norte	0.272151	4016	1728	0.212084	0	0.135995	0.423032	0.255787	0.0966435	0.0885417	0.386	0.0301	0.4912	0.1787	99.54	100	780935	2702312	1709.65	2714932	119869	1329	115351	1412081	0	275	7038.5
Región Metropolitana de Santiago	Chacabuco	Colina	13	Centro	0.426466	971	146207	0.0858665	0.807198	0.141149	0.377308	0.268838	0.179478	0.0332269	0.8855	0.2007	0.783	0.5182	92.57	71.07	9871698	60300338	325.28	60371381	24009899	5604673	3137683	4446827	498	3502	13144.3
Región de La Araucanía	Malleco	Collipulli	9	Sur	0.463856	1296	24598	0.196148	0.745548	0.13741	0.522034	0.253313	0.0604521	0.0267908	0.7038	0.1156	0.6379	0.373	72.56	98.12	2805751	8051393	322.09	8461757	1505781	774265	172256	3853048	160	6266	10810.4
Región del Libertador Bernardo O'Higgins	Cachapoal	Coltauco	6	Centro	0.360801	225	19597	0.111005	0.572077	0.114201	0.500485	0.291269	0.0642445	0.0298005	0.793	0.0595	0.6388	0.3113	75.78	93.92	1766065	4319597	213.31	4587724	457451	115590	190565	2957459	88	1802	12925
Región de Coquimbo	Limarí	Combarbalá	4	Centro	0.254323	1896	13322	0.133862	0.450233	0.11815	0.531076	0.24666	0.0689086	0.0352049	0.7014	0.047	0.6288	0.2747	91.42	97.2	2090784	4699372	337.56	4689696	198001	66584	96326	3204464	77	1588	6204.9
Región del Bío-Bío	Concepción	Concepción	8	Centro	0.41147	222	223574	0.109265	0.979796	0.0837754	0.276866	0.334824	0.278973	0.025562	0.9102	0.3615	0.7967	0.64	87.24	71.45	15442017	48703394	187.45	44736631	20023538	7283487	2451545	5985449	342	2920	10796.8
Región Metropolitana de Santiago	Santiago	Conchalí	13	Centro	0.368831	11	126955	0.124553	1	0.101674	0.363073	0.383104	0.106754	0.045394	0.917	0.1731	0.6389	0.4663	94.4	95.82	6247259	41313995	293.37	40894158	5808068	3510700	948154	9693496	11	3502	13144.3
Región de Valparaíso	Valparaíso	Concón	5	Centro	0.468488	76	42152	0.0816078	0.934926	0.0964842	0.287341	0.313722	0.276879	0.0255741	0.9381	0.2755	0.7843	0.5874	62.14	69.51	3422367	12460630	309.68	14408377	7197782	1164204	1105694	1876984	35	2714	16976.3
Región del Maule	Talca	Constitución	7	Centro	0.24535	1344	46068	0.110283	0.809087	0.12373	0.463988	0.291786	0.0881523	0.0323435	0.8389	0.1133	0.7811	0.4202	84.04	73.57	4667363	14456097	327.19	16516201	2306315	940597	617239	9266453	108	3202	11350.2
Región del Bío-Bío	Arauco	Contulmo	8	Centro	0.311662	962	6031	0.167919	0.507544	0.117228	0.542199	0.234621	0.0780965	0.0278561	0.6101	0.047	0.5998	0.2581	82.31	100	1618023	3699214	571.16	3621135	174503	22558	85857	2633482	50	2920	10796.8
Región de Atacama	Copiapó	Copiapó	3	Norte	0.256673	16681	153937	0.083189	0.980674	0.122485	0.349883	0.34709	0.163892	0.0166497	0.9095	0.2363	0.7537	0.5451	96.32	73.82	9782275	40913250	225.44	39058824	9149044	3528667	2082745	10391076	28	419	4320.73
Región de Coquimbo	Elqui	Coquimbo	4	Centro	0.399549	1429	227730	0.107592	0.942124	0.118913	0.342897	0.364045	0.138256	0.035889	0.8609	0.218	0.7443	0.5189	90.16	74.84	24943497	59664982	191.53	50144982	12202381	3317932	2342681	19950070	332	1588	6204.9
Región del Bío-Bío	Concepción	Coronel	8	Centro	0.38828	279	116262	0.138363	0.972579	0.117089	0.404182	0.337677	0.114698	0.0263543	0.8788	0.198	0.7357	0.504	91.01	78.94	7179270	28094859	217.95	27621211	7289935	3496010	1472794	12322496	332	2920	10796.8
Región de Los Ríos	Valdivia	Corral	14	Sur	0.23653	767	5302	0.154236	0.656545	0.102791	0.516975	0.271596	0.0678989	0.0407393	0.5438	0.0745	0.5704	0.2848	77.83	65.79	924645	2840605	503.88	2743603	191765	114432	25861	2179381	21	1056	4199.22
Región de Aysén del Gral. Ibáñez del Campo	Coyhaique	Coyhaique	11	Sur	0.500793	7290.2	57818	0.0585568	0.864229	0.123232	0.402228	0.290463	0.158117	0.0259608	0.9103	0.2167	0.6807	0.512	86.09	59.86	5175622	15817010	256.32	15762557	3217502	1160769	537712	7596939	443	758	14502.9
Región de La Araucanía	Cautín	Cunco	9	Sur	0.480838	1907	17526	0.207425	0.504793	0.111606	0.511982	0.279071	0.065845	0.0314961	0.6375	0.0441	0.6348	0.2612	69.44	91.89	3263544	5918872	369.77	6679839	942664	243150	195622	3392524	200	6266	10810.4
Región de La Araucanía	Malleco	Curacautín	9	Sur	0.483167	1664	17413	0.20173	0.737265	0.120025	0.482283	0.27824	0.0903922	0.0290587	0.7943	0.0733	0.575	0.3222	67.05	88.1	2521839	6255620	377.7	6872696	708735	100013	164126	3939643	51	6266	10810.4
Región Metropolitana de Santiago	Melipilla	Curacaví	13	Centro	0.405588	693	32579	0.0960293	0.624942	0.110316	0.401056	0.323061	0.125449	0.0401179	0.8307	0.0943	0.7158	0.3827	68.96	77.48	3492250	8287217	239.66	8865281	2375884	1059979	431721	2940658	44	3502	13144.3
Región de Los Lagos	Chiloé	Curaco De Vélez	10	Sur	0.338718	80	3829	0.146287	0.288848	0.0901018	0.586576	0.220423	0.0825281	0.0203709	0.5582	0.0599	0.5832	0.2692	81.87	79.21	1365886	4012629	1045.3	4271094	95291	53979	28009	1921869	19	3026	14306.6
Región del Bío-Bío	Arauco	Curanilahue	8	Centro	0.544084	994	32288	0.136431	0.934527	0.130203	0.44992	0.304231	0.0865337	0.029113	0.8606	0.1575	0.6577	0.4467	71.6	55.6	2856951	10286705	336.1	11400719	739254	184035	264390	4758554	63	2920	10796.8
Región de La Araucanía	Cautín	Curarrehue	9	Sur	0.413792	1171	7489	0.247513	0.303912	0.129924	0.540793	0.221792	0.0600881	0.0474029	0.4646	0.0403	0.5738	0.2207	30.23	88.41	1425515	2715974	463.29	3625733	144016	26700	59024	2119306	63	6266	10810.4
Región del Maule	Talca	Curepto	7	Centro	0.301696	1074	9448	0.126795	0.3587	0.112299	0.575042	0.211685	0.0721846	0.0287892	0.6696	0.0324	0.6432	0.2407	82.43	93.25	1720355	4055160	443.23	4145495	376201	128500	161126	2963018	82	3202	11350.2
Región del Maule	Curicó	Curicó	7	Centro	0.432055	1328	149136	0.100542	0.888914	0.111006	0.39694	0.317817	0.139168	0.0350687	0.8904	0.2179	0.8011	0.5376	94.26	82.67	10649800	31900086	189.02	31331065	9662386	3471291	1476288	12270764	119	3202	11350.2
Región de Los Lagos	Chiloé	Dalcahue	10	Sur	0.360495	1239	13762	0.117736	0.52318	0.101947	0.565179	0.253887	0.0610376	0.017948	0.5853	0.1051	0.596	0.3322	83.24	83.86	1664769	9010906	620.18	9413164	543671	223529	170493	2749335	57	3026	14306.6
Región de Atacama	Chañaral	Diego De Almagro	3	Norte	0.375321	18664	13925	0.0802952	0.951885	0.113537	0.351598	0.379821	0.135153	0.0198923	0.888	0.1465	0.6599	0.4411	63.91	86.35	2663971	5338443	448.31	6392047	1331374	824195	165424	1688045	37	419	4320.73
Región del Libertador Bernardo O'Higgins	Cachapoal	Doñihue	6	Centro	0.364817	78	20887	0.0913667	0.786326	0.111984	0.427491	0.33169	0.0932159	0.0356202	0.8787	0.0809	0.6851	0.3652	89.15	85.63	1698176	5207591	250.34	5748715	1144075	631281	256735	3108023	28	1802	12925
Región Metropolitana de Santiago	Santiago	El Bosque	13	Centro	0.445542	14	162505	0.125563	1	0.109369	0.401711	0.361755	0.0936956	0.0334697	0.9162	0.1409	0.7226	0.4535	81.57	51.14	10609865	26782820	170.52	29292755	2397692	877895	1019194	19836263	25	3502	13144.3
Región de Ñuble	Diguillín	El Carmen	16	Centro	0.329014	664	12044	0.171079	0.403604	0.108685	0.586931	0.215543	0.0605281	0.0283129	0.4764	0.0524	0.601	0.2467	67.41	90.36	1904156	4388763	455.92	5610968	427725	51519	200012	2751178	66	2469	8760.34
Región Metropolitana de Santiago	Talagante	El Monte	13	Centro	0.38684	118	35923	0.117775	0.836372	0.12563	0.423434	0.337973	0.0850152	0.0279487	0.8649	0.0854	0.5909	0.3522	92.15	98.23	2525911	9215445	214.18	8700065	1732413	598429	748831	3200072	51	3502	13144.3
Región de Valparaíso	San Antonio	El Quisco	5	Centro	0.61684	51	15955	0.119128	0.931808	0.0943278	0.357756	0.351865	0.132122	0.0639298	0.8996	0.0851	0.6308	0.3641	47.79	94.61	6273075	15968220	928.47	16764375	1034992	168253	201374	13152099	79	2714	16976.3
Región de Valparaíso	San Antonio	El Tabo	5	Centro	0.45179	99	13286	0.151355	0.949496	0.0953635	0.376186	0.349691	0.1269	0.0518591	0.7116	0.0983	0.594	0.3464	68.78	60.88	4597773	16597800	906.09	13217173	667842	221037	173223	11226311	38	2714	16976.3
Región del Maule	Talca	Empedrado	7	Centro	0.311141	565	4142	0.163469	0.726219	0.139788	0.560116	0.230082	0.0523902	0.0176243	0.6606	0.0476	0.5758	0.2627	70.03	74.55	932620	2886773	715.61	3002704	161430	7561	109283	2043055	4	3202	11350.2
Región de La Araucanía	Malleco	Ercilla	9	Sur	0.449227	500	7733	0.236964	0.47071	0.146774	0.503944	0.24001	0.0504332	0.0588387	0.492	0.0328	0.5852	0.2115	86.85	78.36	1954374	4109940	450.14	3801859	197369	15195	46319	2309756	26	6266	10810.4
Región Metropolitana de Santiago	Santiago	Estación Central	13	Centro	0.422152	14	147041	0.11688	1	0.0926136	0.318918	0.373875	0.177787	0.0368061	0.9071	0.2277	0.7197	0.5298	87.81	88.89	12187986	37595140	140.51	30134492	10845003	5748310	1251431	5390717	101	3502	13144.3
Región del Bío-Bío	Concepción	Florida	8	Centro	0.411222	609	10624	0.159716	0.429217	0.115776	0.506118	0.257059	0.0800075	0.0410392	0.5087	0.0529	0.5873	0.2509	65.3	99.12	1356525	4075747	339.77	4027925	294396	58240	111294	2792189	10	2920	10796.8
Región de La Araucanía	Cautín	Freire	9	Sur	0.440871	935	24606	0.187934	0.320491	0.104893	0.527879	0.265626	0.0621393	0.0394619	0.4792	0.0535	0.6172	0.2511	75.53	68.36	2853824	5735401	253.27	6451247	789300	243248	169984	4564425	200	6266	10810.4
Región de Atacama	Huasco	Freirina	3	Norte	0.248295	3578	7041	0.125236	0.651754	0.150263	0.439852	0.319841	0.0599347	0.0301094	0.7111	0.0568	0.5426	0.2799	75.96	67.63	1421552	3391028	419.18	3244014	269602	131497	66126	1895968	7	419	4320.73
Región de Los Lagos	Llanquihue	Fresia	10	Sur	0.433967	1278	12261	0.190886	0.597912	0.110024	0.563005	0.238888	0.0604355	0.0276486	0.6491	0.0613	0.6088	0.2894	49.5	93.35	1655969	3242852	345.71	4369115	450583	74253	116906	2182491	43	3026	14306.6
Región de Los Lagos	Llanquihue	Frutillar	10	Sur	0.41908	831	18428	0.121158	0.702843	0.114608	0.483395	0.274691	0.0975146	0.0297916	0.8002	0.1259	0.7362	0.4201	83.75	87.04	2814432	6075882	289.91	5910471	1777391	578398	343589	2030893	115	3026	14306.6
Región de Los Lagos	Palena	Futaleufú	10	Sur	0.554384	1280	2623	0.134319	0.708349	0.107892	0.439954	0.279451	0.149066	0.0236371	0.744	0.2077	0.6154	0.4565	83.96	99.04	1244009	2892624	1031.03	2922983	154163	92802	31133	2052987	17	3026	14306.6
Región de Los Ríos	Ranco	Futrono	14	Sur	0.430876	2121	14665	0.158428	0.557995	0.134811	0.502148	0.250188	0.0683259	0.0445278	0.6722	0.0678	0.6551	0.3102	76.42	81.17	1986318	5175112	409.72	6248659	1029414	155621	352838	2679068	122	1056	4199.22
Región de Arica y Parinacota	Parinacota	General Lagos	15	Norte	0.212212	2244	684	0.25883	0	0.200292	0.396199	0.302632	0.0701754	0.0307018	0.2656	0.022	0.5127	0.1443	58.33	100	630789	2030298	2098.36	1699671	15933	629	14979	1319696	0	103	3620.44
Región de La Araucanía	Cautín	Gorbea	9	Sur	0.52516	695	14414	0.19128	0.70487	0.102123	0.487026	0.298529	0.0779104	0.034411	0.7458	0.0853	0.586	0.3341	80.39	76.25	1917800	4230628	306.45	4638690	486437	124377	151737	3031855	68	6266	10810.4
Región del Libertador Bernardo O'Higgins	Cachapoal	Graneros	6	Centro	0.375375	113	33437	0.102829	0.891856	0.117325	0.411789	0.330831	0.103927	0.0361276	0.9056	0.1363	0.5922	0.4181	105.22	86.46	2916139	6754198	162.12	5993804	1099752	404896	261856	3326378	12	1802	12925
Región de Aysén del Gral. Ibáñez del Campo	Aysén	Guaitecas	11	Sur	0.447319	620.6	1843	0.0731909	0.925122	0.100922	0.511666	0.277265	0.10038	0.00976669	0.8524	0.1204	0.6505	0.4057	94.8	46.56	1304649	2304843	1468.42	2355353	247787	59260	187843	1411186	0	758	14502.9
Región de Valparaíso	Quillota	Hijuelas	5	Centro	0.447362	267	17988	0.13224	0.652379	0.120914	0.471759	0.314988	0.0717145	0.0206249	0.8124	0.0934	0.6182	0.3607	90.37	86.26	1741273	4466834	241.85	4647807	1144763	529119	305280	2252363	104	2714	16976.3
Región de Los Lagos	Palena	Hualaihué	10	Sur	0.37483	2788	8944	0.128324	0.407089	0.112925	0.557021	0.236695	0.072339	0.0210197	0.4822	0.0708	0.6542	0.2816	74.47	76.61	1845530	3605525	390.03	3723274	305449	181652	90809	2369630	33	3026	14306.6
Región del Maule	Curicó	Hualañé	7	Centro	0.350884	629	9657	0.127122	0.594698	0.120949	0.544372	0.231542	0.0869835	0.0161541	0.7028	0.0625	0.6512	0.3058	83.46	71.36	1519451	4878469	520.83	5329126	891088	65089	678925	2155617	143	3202	11350.2
Región del Bío-Bío	Concepción	Hualpén	8	Centro	0.432848	54	91773	0.103831	0.991414	0.0984385	0.337104	0.370806	0.168841	0.0248112	0.9191	0.1298	0.7545	0.4481	99.18	86.59	4778993	17014159	181.77	17728672	4894917	1319289	1533829	7309681	52	2920	10796.8
Región del Bío-Bío	Concepción	Hualqui	8	Centro	0.451747	531	24333	0.172812	0.858464	0.124399	0.456458	0.309744	0.0883985	0.0210003	0.7989	0.1265	0.6502	0.4035	90.43	66.58	2608408	6419143	237.8	6269901	726747	413995	162308	4580852	125	2920	10796.8
Región de Tarapacá	Tamarugal	Huara	1	Norte	0.192564	10475	2730	0.202363	0.406227	0.134799	0.476923	0.264469	0.0626374	0.0611722	0.583	0.0416	0.5284	0.234	75.08	89.89	1297318	3154721	1339.21	4075221	113591	87195	19715	1812813	3	275	7038.5
Región de Atacama	Huasco	Huasco	3	Norte	0.293081	1601	10149	0.0929377	0.877131	0.125037	0.382599	0.351365	0.10336	0.0376392	0.8378	0.0755	0.5866	0.3335	88.3	83.24	2027079	4515092	410.38	4667709	1039601	744056	145397	1925504	41	419	4320.73
Región Metropolitana de Santiago	Santiago	Huechuraba	13	Centro	0.510928	45	98671	0.0825118	0.998997	0.117177	0.340961	0.292852	0.211856	0.0371538	0.9287	0.267	0.7195	0.563	90.09	86.66	12244507	38183589	337.37	38612634	26403314	16218444	1827467	3289485	7	3502	13144.3
Región de Coquimbo	Choapa	Illapel	4	Centro	0.271889	2629	30848	0.118994	0.682443	0.127366	0.460775	0.298496	0.0887902	0.0245721	0.8036	0.0859	0.6717	0.3593	82.15	55.82	3856514	7485403	235.4	7744309	856972	278876	335350	4646256	95	1588	6204.9
Región Metropolitana de Santiago	Santiago	Independencia	13	Centro	0.436422	7	100281	0.139347	1	0.0961698	0.254684	0.413229	0.193696	0.0422214	0.9146	0.2308	0.7471	0.5403	93.53	78.2	7309646	24632658	152.14	22464338	5286897	2271121	818837	3902164	25	3502	13144.3
Región de Tarapacá	Iquique	Iquique	1	Norte	0.483332	2262	191468	0.123167	0.98745	0.108707	0.292514	0.366651	0.20253	0.0295976	0.8957	0.3218	0.7469	0.5993	77.43	54.14	15794601	67928354	326.01	74046726	22970644	10968263	1569021	4344323	88	275	7038.5
Región Metropolitana de Santiago	Talagante	Isla de Maipo	13	Centro	0.353627	189	40418	0.114633	0.743836	0.113918	0.426627	0.317402	0.109307	0.0327452	0.8313	0.0907	0.6366	0.3634	89.71	89.99	2574100	7918262	205.84	8399065	2160227	612348	414043	3295275	134	3502	13144.3
Región de Valparaíso	Valparaíso	Juan Fernández	5	Centro	0.388072	148	926	0.122312	0	0.0971922	0.359611	0.332613	0.190065	0.0205184	0.9071	0.0755	0.6855	0.3608	76.85	88.89	1268422	2303030	2865.73	3017616	17566	12696	0	1529717	2	2714	16976.3
Región Metropolitana de Santiago	Santiago	La Cisterna	13	Centro	0.523841	10	90119	0.0780807	1	0.0959731	0.286621	0.374294	0.200391	0.0427213	0.8781	0.2436	0.7798	0.5505	73.3	71.77	7551338	18581383	169.18	17108216	3974742	1465709	972718	3307103	90	3502	13144.3
Región de Valparaíso	Quillota	La Cruz	5	Centro	0.526069	78	22098	0.0863402	0.880261	0.119106	0.329215	0.338583	0.189565	0.0235315	0.8996	0.1669	0.596	0.4473	96.35	86.44	2178678	5747550	218.06	5671335	1073029	96263	736043	2220052	71	2714	16976.3
Región del Libertador Bernardo O'Higgins	Cardenal Caro	La Estrella	6	Centro	0.409761	435	3041	0.0752598	0.372575	0.0966787	0.546202	0.260112	0.0772772	0.0197304	0.7273	0.0705	0.516	0.2979	84.26	81.55	1298438	3173600	967.87	3012988	915720	510878	187334	1396893	13	1802	12925
Región Metropolitana de Santiago	Santiago	La Florida	13	Centro	0.474352	71	366916	0.0801379	0.999681	0.0947192	0.305353	0.353108	0.216864	0.0299551	0.9535	0.2838	0.7545	0.5888	90.75	55.15	21922551	135937708	322.25	130569896	23921434	11481484	3365062	31069413	527	3502	13144.3
Región Metropolitana de Santiago	Santiago	La Granja	13	Centro	0.401931	10	116571	0.119431	1	0.104434	0.403274	0.367081	0.0855015	0.0397097	0.9359	0.1284	0.6462	0.4266	86.55	82.1	9131855	22274580	179.41	21892730	1967200	766703	586186	14246220	68	3502	13144.3
Región de Coquimbo	Elqui	La Higuera	4	Centro	0.255208	4158	4241	0.155764	0.304881	0.158925	0.520632	0.245225	0.0367838	0.0384343	0.6189	0.0506	0.505	0.251	88.07	97.1	1140595	5406790	1269.5	5684802	1005333	82613	891978	1800253	118	1588	6204.9
Región de Valparaíso	Petorca	La Ligua	5	Centro	0.478481	1163	3539	0.132037	0.734925	0.113817	0.439079	0.310935	0.104012	0.032156	0.8137	0.1083	0.643	0.3841	85.25	45.09	3139092	9088245	223.89	8498245	1379271	396304	309491	4928833	145	2714	16976.3
Región Metropolitana de Santiago	Santiago	La Pintana	13	Centro	0.404417	31	177335	0.153359	1	0.127882	0.467996	0.325277	0.0428398	0.0360053	0.8924	0.0842	0.6228	0.3604	86.59	72.6	11663935	31984429	169.5	32111690	2235307	808960	702066	24541935	53	3502	13144.3
Región Metropolitana de Santiago	Santiago	La Reina	13	Centro	0.488998	23	92787	0.0469342	1	0.0897108	0.21447	0.266072	0.40718	0.0225678	0.97	0.2823	0.8186	0.6074	94.73	62.21	9347856	39215036	374.78	37649562	15979540	4407089	2382298	1815687	103	3502	13144.3
Región de Coquimbo	Elqui	La Serena	4	Centro	0.387866	1893	221054	0.115705	0.907652	0.110489	0.313715	0.350923	0.192523	0.0323496	0.8909	0.2785	0.7814	0.5788	93.86	45.34	14359092	74377763	304.03	77357913	17466455	4539798	2869473	12239937	448	1588	6204.9
Región de Los Ríos	Ranco	La Unión	14	Sur	0.467484	2137	38036	0.124963	0.700967	0.113471	0.462851	0.285703	0.0966979	0.0412767	0.7308	0.1373	0.7898	0.4295	87.26	89.71	3517282	9285569	241.71	9570131	1824722	623929	343712	5244617	321	1056	4199.22
Región de Los Ríos	Ranco	Lago Ranco	14	Sur	0.350827	1763	9896	0.136226	0.229285	0.122171	0.560125	0.21443	0.0640663	0.0392078	0.5893	0.0471	0.6007	0.2555	82.1	69.82	1700627	5614533	598.15	6156747	1343406	80840	872718	2331163	85	1056	4199.22
Región de Aysén del Gral. Ibáñez del Campo	Coyhaique	Lago Verde	11	Sur	0.34224	4560	852	0.0609561	0	0.140845	0.49061	0.279343	0.0669014	0.0223005	0.7478	0.0787	0.5092	0.3106	91.98	88.1	1296163	2385096	2407.6	2212582	180060	35303	104604	1448320	0	758	14502.9
Región del Bío-Bío	Biobío	Laja	8	Centro	0.387924	340	22389	0.134975	0.724552	0.131359	0.445665	0.302693	0.0933048	0.0269775	0.7383	0.0831	0.6919	0.3488	74.3	77.68	2156661	6616763	290.42	6939894	1065231	622427	198684	3880294	43	2920	10796.8
Región de Los Ríos	Valdivia	Lanco	14	Sur	0.298803	532	16752	0.142398	0.692873	0.118911	0.461437	0.307963	0.0690664	0.0426218	0.7211	0.095	0.6236	0.3495	88.56	86.83	1842636	4632920	242.16	4301193	436876	121139	144221	2961543	69	1056	4199.22
Región del Libertador Bernardo O'Higgins	Cachapoal	Las Cabras	6	Centro	0.272056	749	24640	0.111335	0.388717	0.118628	0.494318	0.284416	0.0588068	0.0438312	0.7823	0.0753	0.6434	0.3359	85.14	92.43	3173736	8402175	308.84	8349183	3701309	2596518	287901	2226154	44	1802	12925
Región Metropolitana de Santiago	Santiago	Las Condes	13	Centro	0.645172	99	294838	0.0277755	1	0.0805154	0.154013	0.217682	0.519306	0.0284834	0.9926	0.78	0.866	0.8752	85.64	81.05	42306354	329569560	945.02	316860161	134393360	61845613	7912342	4179372	58	3502	13144.3
Región de La Araucanía	Cautín	Lautaro	9	Sur	0.463159	901	38013	0.18518	0.718728	0.124194	0.423855	0.314761	0.086523	0.0506669	0.7198	0.117	0.6239	0.3746	84.96	64.06	3507713	16198618	388.81	15966380	2377248	775636	863053	4802052	286	6266	10810.4
Región del Bío-Bío	Arauco	Lebu	8	Centro	0.36223	561	25522	0.172719	0.919873	0.12981	0.498393	0.257386	0.0833399	0.0310712	0.8371	0.1438	0.6348	0.4244	84.86	89.22	2679184	7644150	254.31	6898877	522995	153133	184709	4667060	36	2920	10796.8
Región del Maule	Curicó	Licantén	7	Centro	0.437619	273	6653	0.130004	0.74628	0.108222	0.483842	0.277619	0.108973	0.0213438	0.7002	0.0728	0.6458	0.3205	66.53	93.83	1683868	4939249	768.6	5374819	513367	91352	276074	3404277	91	3202	11350.2
Región de Valparaíso	Marga Marga	Limache	5	Centro	0.502096	294	46121	0.10471	0.849266	0.106351	0.3787	0.336506	0.139091	0.039353	0.9015	0.1564	0.6696	0.4554	80.66	73.21	3161577	10401534	214.41	10814476	1573705	236639	618369	5564922	143	2714	16976.3
Región del Maule	Linares	Linares	7	Centro	0.386659	1466	93602	0.10891	0.829811	0.112092	0.424297	0.313829	0.121589	0.0281938	0.8563	0.175	0.8138	0.4959	85.26	70.37	6251277	19623078	187.5	19105052	3665028	1166923	788017	10457510	499	3202	11350.2
Región del Libertador Bernardo O'Higgins	Cardenal Caro	Litueche	6	Centro	0.476054	619	6294	0.121822	0.535113	0.111376	0.506991	0.271528	0.0768986	0.0332062	0.7665	0.0561	0.6135	0.2977	85.45	87.58	1291868	3741703	542.25	3698167	765294	169701	293982	1485249	32	1802	12925
Región de Valparaíso	San Felipe de Aconcagua	Llaillay	5	Centro	0.331962	349	24608	0.124967	0.730332	0.121993	0.421286	0.320343	0.0861102	0.0502682	0.8868	0.0885	0.6659	0.3739	76.1	86.61	1935575	4955403	201.57	5394037	724283	275349	212013	2845572	36	2714	16976.3
Región de Los Lagos	Llanquihue	Llanquihue	10	Sur	0.360495	421	17591	0.123154	0.808482	0.107555	0.461827	0.306862	0.0899892	0.0337673	0.8024	0.1207	0.6266	0.393	100	88.1	1880301	5142717	242.24	4528391	1108132	401429	289494	2249801	58	3026	14306.6
Región Metropolitana de Santiago	Santiago	Lo Barnechea	13	Centro	0.692211	1024	105833	0.0549175	0.974498	0.106706	0.275935	0.238338	0.356099	0.0229229	0.945	0.4029	0.816	0.6773	73.95	60.38	17634493	98344640	779.22	98817363	67951838	24880594	8057561	1944421	76	3502	13144.3
Región Metropolitana de Santiago	Santiago	Lo Espejo	13	Centro	0.415273	7	98804	0.144225	1	0.108204	0.437877	0.350957	0.0586211	0.0443403	0.9168	0.1088	0.5995	0.391	93.09	68.84	7340834	19269218	170.06	17580636	1330221	572971	432039	11730256	97	3502	13144.3
Región Metropolitana de Santiago	Santiago	Lo Prado	13	Centro	0.413638	7	96249	0.136776	1	0.0975698	0.391724	0.372149	0.101601	0.0369562	0.9103	0.1177	0.6231	0.4057	92.41	66.79	7074363	39376529	365.01	38108381	1216233	275118	571872	11047160	11	3502	13144.3
Región del Libertador Bernardo O'Higgins	Colchagua	Lolol	6	Centro	0.41676	597	6811	0.143769	0.356629	0.141095	0.515783	0.25679	0.0710615	0.0152694	0.6815	0.0587	0.5618	0.2822	90.98	76.75	1169391	3069492	421.07	3093165	540952	267958	125056	1702990	20	1802	12925
Región de La Araucanía	Cautín	Loncoche	9	Sur	0.503761	977	23612	0.168127	0.702693	0.118923	0.50271	0.281467	0.0686092	0.0282907	0.6645	0.0709	0.6871	0.3187	67.89	83.67	2595197	5974726	236.65	5860851	545133	154090	146019	3944544	110	6266	10810.4
Región del Maule	Linares	Longaví	7	Centro	0.181366	1454	30534	0.163592	0.302843	0.123403	0.548864	0.243794	0.0429357	0.0410035	0.6721	0.0784	0.6387	0.3228	86.85	99.15	2519604	6993294	267.62	8845265	740307	115591	283414	4257852	142	3202	11350.2
Región de La Araucanía	Malleco	Lonquimay	9	Sur	0.496823	3914	10251	0.225271	0.369427	0.149449	0.524534	0.225734	0.0564823	0.0438006	0.3793	0.0425	0.536	0.2053	73.12	93.16	2518343	5335406	457.03	5059798	188435	44309	68669	3140413	252	6266	10810.4
Región del Bío-Bío	Arauco	Los Álamos	8	Centro	0.415852	599	21035	0.169403	0.890231	0.138246	0.505538	0.2628	0.0653673	0.0280485	0.7999	0.1223	0.6178	0.3924	89.88	90.55	2465071	7354199	329.6	7464519	417091	55302	167015	3480828	89	2920	10796.8
Región de Valparaíso	Los Andes	Los Andes	5	Centro	0.461308	1248	66708	0.102912	0.914688	0.100138	0.33116	0.372549	0.150447	0.0457067	0.9298	0.2241	0.7685	0.543	101.55	71.58	4567164	15200689	209.08	14301295	3526318	1613668	652184	6789443	82	2714	16976.3
Región del Bío-Bío	Biobío	Los Ángeles	8	Centro	0.468907	1748	202331	0.134482	0.746732	0.116784	0.399919	0.320999	0.135807	0.0264912	0.7343	0.1822	0.7751	0.4698	80.35	16.64	11949943	37903963	172.05	37855728	10776603	4008803	2041908	16576907	142	2920	10796.8
Región de Los Ríos	Valdivia	Los Lagos	14	Sur	0.383206	1791	19634	0.145299	0.499032	0.123357	0.487573	0.293572	0.0604054	0.0350922	0.6021	0.0874	0.6045	0.3168	88.13	65.24	1845132	4589964	251.72	5167115	911987	240397	255345	2836461	63	1056	4199.22
Región de Los Lagos	Llanquihue	Los Muermos	10	Sur	0.462158	1246	17068	0.16576	0.474924	0.1146	0.598547	0.20266	0.0590579	0.0251348	0.5861	0.066	0.6259	0.2894	84.31	94.89	1515551	4293543	261.87	4668589	618557	62274	190192	2567682	86	3026	14306.6
Región de La Araucanía	Malleco	Los Sauces	9	Sur	0.498577	850	7265	0.155207	0.608121	0.131315	0.535857	0.22863	0.0483138	0.0558844	0.6115	0.0412	0.6013	0.2475	72.77	93.45	1533366	4210205	527.41	3960838	344429	52210	146835	2341234	50	6266	10810.4
Región de Coquimbo	Choapa	Los Vilos	4	Centro	0.259965	1861	21382	0.148587	0.799458	0.12562	0.421897	0.304929	0.100505	0.0470489	0.811	0.0806	0.6429	0.3477	72.15	80.47	3403804	8337502	396.12	9375360	1060136	312585	325934	6478890	52	1588	6204.9
Región del Bío-Bío	Concepción	Lota	8	Centro	0.354657	136	43535	0.144296	0.997519	0.114322	0.445963	0.333479	0.0815666	0.0246698	0.8283	0.1639	0.6475	0.4446	80.41	71.74	3473489	16238652	339.62	15511252	878419	482380	228805	7167524	10	2920	10796.8
Región de La Araucanía	Malleco	Lumaco	9	Sur	0.437226	1119	9548	0.217496	0.422392	0.159615	0.56483	0.196795	0.0402178	0.0385421	0.4588	0.0397	0.5478	0.2152	67.62	85.02	1673335	3596824	462.77	4634618	240585	46657	101123	2686516	20	6266	10810.4
Región del Libertador Bernardo O'Higgins	Cachapoal	Machalí	6	Centro	0.504338	2586	52505	0.0696168	0.980935	0.122693	0.32456	0.275517	0.244243	0.0329873	0.8291	0.1734	0.7644	0.479	80.28	85.55	3370672	11332660	190.42	11663855	4719372	1235970	839551	2142517	74	1802	12925
Región Metropolitana de Santiago	Santiago	Macul	13	Centro	0.424595	13	116534	0.0694957	1	0.0903427	0.278571	0.343007	0.259675	0.0284037	0.9245	0.2374	0.7365	0.5448	93.96	71.86	10542726	41871829	305.41	41619991	9868911	5448225	1550897	4270787	20	3502	13144.3
Región de Los Ríos	Valdivia	Máfil	14	Sur	0.261407	583	7095	0.155298	0.598027	0.113601	0.469767	0.299366	0.0663848	0.0508809	0.6808	0.0985	0.6145	0.3455	81.42	74.06	1226213	2730076	410.51	3033641	324905	33019	119018	1700488	53	1056	4199.22
Región Metropolitana de Santiago	Santiago	Maipú	13	Centro	0.468077	133	521627	0.070332	0.993419	0.094349	0.30387	0.396628	0.17941	0.0257425	0.9695	0.2817	0.7793	0.597	94.18	81.58	45779877	124148435	222.53	129970907	20923104	8192861	4087106	55445097	37	3502	13144.3
Región del Libertador Bernardo O'Higgins	Cachapoal	Malloa	6	Centro	0.398768	113	13407	0.11837	0.407101	0.103453	0.531364	0.27232	0.0682479	0.024614	0.8123	0.0629	0.6228	0.3169	70.12	64.81	1651006	3909920	314.44	4469140	532849	115179	220626	2182558	25	1802	12925
Región del Libertador Bernardo O'Higgins	Cardenal Caro	Marchihue	6	Centro	0.356665	660	7308	0.108285	0.454433	0.108238	0.526546	0.266968	0.0781335	0.0201149	0.8381	0.0684	0.6058	0.3262	104.63	98.43	1716253	11106762	1404.75	10754784	3170537	148121	2819302	1661250	61	1802	12925
Región de Antofagasta	Tocopilla	María Elena	2	Norte	0.20363	12197	6457	0.17598	0.762738	0.0709308	0.293015	0.464767	0.154251	0.0170358	0.9335	0.0903	0.623	0.3745	68.55	87.74	1528036	4770439	800.48	5421629	2082394	1703911	120267	1248853	0	602	17070.9
Región Metropolitana de Santiago	Melipilla	María Pinto	13	Centro	0.340716	395	1359	0.10327	0.490581	0.108462	0.463576	0.307211	0.0818249	0.0389257	0.8408	0.0597	0.5803	0.3076	89.75	72.08	1637586	8207164	585.43	8858653	1566261	568227	736042	1686115	40	3502	13144.3
Región de Los Ríos	Valdivia	Mariquina	14	Sur	0.324972	1321	21278	0.148175	0.468042	0.124354	0.485525	0.292697	0.060297	0.0371276	0.6875	0.085	0.6385	0.3341	89.78	65.51	2372385	6625431	252.49	5922842	732270	149625	192925	3530966	43	1056	4199.22
Región del Maule	Talca	Maule	7	Centro	0.3633	238	49721	0.12686	0.781038	0.135436	0.392591	0.319925	0.119748	0.0323002	0.8704	0.0777	0.6645	0.3556	81.4	90.32	2038652	8419806	142.51	8891500	1426191	508539	609394	5044599	104	3202	11350.2
Región de Los Lagos	Llanquihue	Maullín	10	Sur	0.354657	861	14216	0.131717	0.466095	0.0967923	0.582583	0.238253	0.0547271	0.0276449	0.6792	0.0517	0.5889	0.2745	83.06	86.79	1703592	4321231	286.21	4252854	169503	48853	120650	2508858	99	3026	14306.6
Región de Antofagasta	Antofagasta	Mejillones	2	Norte	0.320343	3804	13467	0.128459	0.961907	0.0984629	0.338457	0.432762	0.0847256	0.0455929	0.8755	0.1268	0.5601	0.3962	73.49	89.7	2938852	7255199	590.28	8953429	4133222	2940239	213680	1667833	26	602	17070.9
Región de La Araucanía	Cautín	Melipeuco	9	Sur	0.472053	1107	6138	0.183262	0.457315	0.115347	0.504562	0.262952	0.0656566	0.0514826	0.6065	0.0261	0.6086	0.2127	79.78	80.39	1837710	3500886	583.31	3664930	151282	43796	55031	2523679	119	6266	10810.4
Región Metropolitana de Santiago	Melipilla	Melipilla	13	Centro	0.388077	1345	123627	0.0911081	0.685319	0.114498	0.419237	0.320229	0.107096	0.0389397	0.8684	0.1199	0.7241	0.4225	96.53	73.93	7837620	43444859	293.9	42257020	4043833	1292570	1032071	11403920	87	3502	13144.3
Región del Maule	Curicó	Molina	7	Centro	0.366824	1552	45976	0.129809	0.811684	0.127588	0.460023	0.307225	0.0777145	0.0274491	0.8722	0.093	0.6444	0.3739	88.33	93.58	2815138	10159540	198.63	10013668	2074160	887167	361889	5718924	252	3202	11350.2
Región de Coquimbo	Limarí	Monte Patria	4	Centro	0.275098	4366	30751	0.160482	0.498781	0.133784	0.534682	0.252024	0.0448766	0.034633	0.7233	0.0537	0.6416	0.2922	86.07	89.15	4270392	7151057	236.21	7701937	466617	112347	231990	5646064	67	1588	6204.9
Región del Libertador Bernardo O'Higgins	Cachapoal	Mostazal	6	Centro	0.501506	524	25343	0.127402	0.826816	0.116561	0.449513	0.328572	0.0746557	0.0306988	0.8506	0.1176	0.5691	0.3847	81.3	89.86	3084822	9852345	419.2	11639145	3697416	2692210	244107	2465934	53	1802	12925
Región del Bío-Bío	Biobío	Nacimiento	8	Centro	0.39006	935	26315	0.145354	0.875204	0.132206	0.446247	0.31807	0.0862246	0.0172525	0.7796	0.1281	0.7069	0.4133	78.58	81.85	2510003	5990595	229.25	6414756	1529968	904992	241426	3594572	30	2920	10796.8
Región del Libertador Bernardo O'Higgins	Colchagua	Nancagua	6	Centro	0.419105	111	17833	0.127099	0.6359	0.110357	0.493411	0.287108	0.0730668	0.0360567	0.8711	0.0742	0.6956	0.3556	70.88	69.01	1922429	5086631	284.08	5485258	806039	421108	195022	2194480	86	1802	12925
Región de Magallanes y Antártica Chilena	Última Esperanza	Natales	12	Sur	0.374409	49924	21477	0.0650426	0.893048	0.0989431	0.420077	0.326209	0.121712	0.0330586	0.9449	0.2045	0.676	0.5074	89.23	73.36	4145538	12443285	520.39	12512268	1473365	869219	182068	3893409	222	897	29091.7
Región del Libertador Bernardo O'Higgins	Cardenal Caro	Navidad	6	Centro	0.363893	300	6641	0.143761	0	0.098178	0.493751	0.259901	0.112182	0.0359886	0.7221	0.0293	0.6066	0.2343	72.03	93.05	2333178	6487005	974	6786821	258935	40710	98556	5686405	35	1802	12925
Región del Bío-Bío	Biobío	Negrete	8	Centro	0.360987	157	9737	0.152029	0.621855	0.133203	0.499743	0.275239	0.0620314	0.0297833	0.7066	0.0534	0.6127	0.2848	87.78	72.08	1545564	3197603	322.15	3374199	460372	114463	259506	2135300	53	2920	10796.8
Región de Ñuble	Itata	Ninhue	16	Centro	0.170247	401	5213	0.140577	0.28755	0.111068	0.590831	0.195856	0.0583157	0.0439286	0.4033	0.0275	0.6622	0.1943	65.38	94.67	1199804	2708688	559.73	3023678	135527	17980	59288	2155346	126	2469	8760.34
Región de Valparaíso	Quillota	Nogales	5	Centro	0.402713	405	22120	0.12488	0.84896	0.117767	0.443716	0.338155	0.0764467	0.023915	0.8701	0.102	0.6198	0.3803	88.99	66.21	1977580	5650579	241.94	5699760	1056431	496855	275961	2814483	22	2714	16976.3
Región de La Araucanía	Cautín	Nueva Imperial	9	Sur	0.504811	733	3251	0.199638	0.580775	0.122516	0.472808	0.291941	0.0854199	0.0273147	0.6756	0.0674	0.6605	0.311	79.08	92.94	3964171	8294091	279.21	9464536	508021	129848	239649	6443845	271	6266	10810.4
Región de Ñuble	Punilla	Ñiquén	16	Centro	0.187519	493	11152	0.191849	0.103389	0.114778	0.569674	0.224892	0.0447453	0.045911	0.6615	0.0514	0.5765	0.2697	95.31	74.24	1461169	3560444	320.04	3701236	290555	21246	128356	2641611	255	2469	8760.34
Región Metropolitana de Santiago	Santiago	Ñuñoa	13	Centro	0.305168	17	208237	0.0396853	1	0.0833137	0.16414	0.251444	0.474656	0.0264458	0.9681	0.3601	0.8254	0.6602	70.41	61.47	13996601	62144258	252.28	64539377	23314784	5779683	2310193	3547896	54	3502	13144.3
Región de Aysén del Gral. Ibáñez del Campo	Capitán Prat	O'Higgins	11	Sur	0.390402	8182	625	0.0140288	0	0.144	0.3888	0.2992	0.1392	0.0288	0.7503	0.0871	0.569	0.3338	61.72	96.15	819914	1967570	2779.69	1848497	28985	15276	5669	1423645	0	758	14502.9
Región del Libertador Bernardo O'Higgins	Cachapoal	Olivar	6	Centro	0.386986	45	13608	0.109767	0.68254	0.113904	0.470312	0.283436	0.103101	0.0292475	0.8727	0.0807	0.6497	0.3577	80.34	74.96	1237996	3185749	247.39	3645534	881894	425307	193859	1712139	34	1802	12925
Región de Antofagasta	El Loa	Ollagüe	2	Norte	0.103769	2964	321	0.131897	0	0.11215	0.367601	0.345794	0.124611	0.0498442	0.6779	0.0557	0.4334	0.2538	69.73	100	1088766	2739568	9586.28	2712916	474526	411447	57993	1715493	0	602	17070.9
Región de Valparaíso	Marga Marga	Olmué	5	Centro	0.493454	232	17516	0.152341	0.700902	0.102649	0.417847	0.311886	0.131194	0.0364238	0.7414	0.0887	0.5819	0.3369	85.87	70.99	1994271	5575056	257.61	5032446	1199452	169746	293671	2512435	30	2714	16976.3
Región de Los Lagos	Osorno	Osorno	10	Sur	0.464973	951	161460	0.105327	0.915558	0.10776	0.393485	0.318518	0.149015	0.0312214	0.894	0.2485	0.7974	0.5617	90.25	91.25	10656099	30483851	183.89	32046008	10229112	3619049	1809978	10709265	311	3026	14306.6
Región de Coquimbo	Limarí	Ovalle	4	Centro	0.407706	3835	111272	0.111072	0.786712	0.122744	0.413887	0.329553	0.0937972	0.0400191	0.8733	0.1154	0.7591	0.4245	76.43	80.95	8170460	24902091	252.57	30874187	4556575	1827236	1049397	15126452	82	1588	6204.9
Región Metropolitana de Santiago	Talagante	Padre Hurtado	13	Centro	0.393426	81	63250	0.0902412	0.881075	0.119921	0.372221	0.360838	0.116016	0.031004	0.8551	0.1419	0.7037	0.4403	82.95	65.82	4325981	11878049	162.71	12401928	3162527	819717	866350	4319683	44	3502	13144.3
Región de La Araucanía	Cautín	Padre Las Casas	9	Sur	0.583167	401	76126	0.188599	0.596944	0.121076	0.422812	0.326958	0.0893913	0.039763	0.6557	0.0777	0.6142	0.3152	72.82	98.29	5669607	16469728	208.3	17290640	2118062	542447	1099452	9870430	106	6266	10810.4
Región de Coquimbo	Elqui	Paiguano	4	Centro	0.251735	1495	4497	0.120931	0	0.0962864	0.455192	0.302869	0.121637	0.024016	0.8018	0.0647	0.5776	0.3107	89.38	87.06	1091074	3498594	687.86	3226066	233481	71206	74518	2341216	18	1588	6204.9
Región de Los Ríos	Valdivia	Paillaco	14	Sur	0.434472	896	20188	0.14782	0.616802	0.120121	0.492768	0.28408	0.0730632	0.0299683	0.7143	0.1011	0.661	0.3628	85.26	92.21	1912044	4739864	235.13	4902012	800224	257315	185203	2885281	21	1056	4199.22
Región Metropolitana de Santiago	Maipo	Paine	13	Centro	0.497871	678	72759	0.110248	0.642573	0.113842	0.426078	0.31416	0.108399	0.0375211	0.8682	0.1154	0.7316	0.4185	87.22	64.09	4686463	13563704	175.69	14824889	5204821	2361485	1079488	3962971	49	3502	13144.3
Región de Los Lagos	Palena	Palena	10	Sur	0.385213	2764	1711	0.129348	0.628288	0.0970193	0.52893	0.249562	0.116306	0.00818235	0.7006	0.1676	0.6279	0.4193	67.73	83.33	1018897	1802193	1146.92	2094280	68036	37957	19084	1424967	32	3026	14306.6
Región del Libertador Bernardo O'Higgins	Colchagua	Palmilla	6	Centro	0.358215	237	12482	0.100772	0.27752	0.109197	0.512979	0.282166	0.0620894	0.0335683	0.8252	0.0716	0.6113	0.3306	79.66	87.32	1574101	4141398	347.89	4656904	1172151	555630	288085	1777838	45	1802	12925
Región de Los Ríos	Valdivia	Panguipulli	14	Sur	0.374907	3292	34539	0.140731	0.442196	0.123686	0.492979	0.25988	0.0713976	0.0520571	0.5485	0.1033	0.677	0.3372	89.61	81.71	5521566	21740524	608.21	21939232	2871196	1552055	381226	7977629	154	1056	4199.22
Región de Valparaíso	San Felipe de Aconcagua	Panquehue	5	Centro	0.508755	122	7273	0.106621	0.523305	0.109996	0.481507	0.314863	0.0754847	0.0181493	0.8291	0.0952	0.7061	0.382	87.54	92.49	1322148	3304402	410.54	3158708	409805	170122	233890	1509486	17	2714	16976.3
Región de Valparaíso	Petorca	Papudo	5	Centro	0.475394	166	6356	0.13493	0.851794	0.0885777	0.4163	0.357615	0.104154	0.0333543	0.9009	0.0847	0.6118	0.3601	91.14	82.56	1776346	5700534	965.9	6056193	1912394	505281	692672	1329368	32	2714	16976.3
Región del Libertador Bernardo O'Higgins	Cardenal Caro	Paredones	6	Centro	0.419625	562	6188	0.135606	0.297673	0.137363	0.583872	0.200549	0.0641564	0.0140595	0.6692	0.0391	0.5987	0.2502	71.13	76.67	1505323	4091969	639.6	4051850	198293	21992	101818	2936844	21	1802	12925
Región del Maule	Linares	Parral	7	Centro	0.350415	1638	41637	0.139862	0.739583	0.128107	0.481063	0.264788	0.0970291	0.0290127	0.7907	0.1442	0.6837	0.4272	80.87	81.84	3590613	9334851	233.48	10470071	1629127	482754	488454	5574244	82	3202	11350.2
Región Metropolitana de Santiago	Santiago	Pedro Aguirre Cerda	13	Centro	0.413832	10	101174	0.117217	1	0.0982762	0.386226	0.371222	0.098464	0.0458122	0.9207	0.1749	0.6387	0.4685	76.16	65.22	7606968	16154157	152.79	16410564	2675826	1176982	750050	9302273	23	3502	13144.3
Región del Maule	Talca	Pelarco	7	Centro	0.379003	332	8422	0.142369	0.307172	0.136903	0.495369	0.276894	0.058181	0.0326526	0.7265	0.0741	0.5888	0.3164	89.19	68.65	1452033	7542624	834.59	7654047	1946153	30955	1759591	1626268	38	3202	11350.2
Región del Maule	Cauquenes	Pelluhue	7	Centro	0.360987	371	7571	0.157039	0.53903	0.127724	0.494254	0.237485	0.100911	0.0396249	0.6747	0.0584	0.6119	0.289	71.86	90.3	1586736	6490284	883.29	7231485	447594	63323	209213	5658396	85	3202	11350.2
Región de Ñuble	Diguillín	Pemuco	16	Centro	0.304896	563	8448	0.165352	0.493371	0.119555	0.549006	0.2558	0.0665246	0.00911458	0.6542	0.0487	0.5596	0.2612	93.03	85.79	1475980	4474784	508.04	4384893	1143767	442419	481824	1927216	110	2469	8760.34
Región del Bío-Bío	Concepción	Penco	8	Centro	0.360495	108	47367	0.12542	0.990141	0.105031	0.395634	0.349357	0.123905	0.026073	0.9052	0.1543	0.6643	0.4527	71.23	69.85	3351632	9867708	209.4	10464951	2183373	964364	432856	5469366	25	2920	10796.8
Región Metropolitana de Santiago	Talagante	Peñaflor	13	Centro	0.588987	69	90201	0.0898835	0.920877	0.111163	0.354087	0.365262	0.133313	0.0361748	0.9222	0.1747	0.7078	0.485	86.81	99.5	7722632	17007487	154.99	15912329	3543731	1003951	947141	7698844	154	3502	13144.3
Región Metropolitana de Santiago	Santiago	Peñalolén	13	Centro	0.516571	54	241599	0.106019	1	0.103618	0.361417	0.325353	0.179608	0.0300043	0.9298	0.2156	0.7421	0.5299	90.07	83.08	16336071	97263658	347.4	93552155	18826009	2488954	8785706	15572193	137	3502	13144.3
Región del Libertador Bernardo O'Higgins	Colchagua	Peralillo	6	Centro	0.2788	283	11007	0.113908	0.60298	0.109476	0.491869	0.297084	0.0759517	0.0256201	0.8605	0.0766	0.6101	0.3426	86.15	85.15	1905137	3853107	317.07	3787673	695525	303304	170147	1860156	26	1802	12925
Región de La Araucanía	Cautín	Perquenco	9	Sur	0.465691	331	6905	0.186968	0.516148	0.129182	0.517741	0.28197	0.0580739	0.013034	0.6612	0.0517	0.6008	0.2739	86.67	100	1564910	3067887	469.37	3398729	227634	17276	56301	2534595	32	6266	10810.4
Región de Valparaíso	Petorca	Petorca	5	Centro	0.353293	1517	9826	0.115184	0.417566	0.123753	0.454203	0.306228	0.0824344	0.0333808	0.8473	0.0549	0.6272	0.3078	73.03	78.05	1788468	4502186	445.23	4714943	641486	69076	515649	2130058	33	2714	16976.3
Región del Libertador Bernardo O'Higgins	Cachapoal	Peumo	6	Centro	0.285335	153	14313	0.0919633	0.838399	0.106966	0.49738	0.297352	0.0755956	0.0227066	0.8278	0.0967	0.6392	0.3713	87.57	77.56	1565832	3866103	255.71	3832265	735035	369106	184262	2016063	36	1802	12925
Región de Tarapacá	Tamarugal	Pica	1	Norte	0.355946	8934	9296	0.167743	0.420826	0.0660499	0.228485	0.459445	0.206756	0.0392642	0.787	0.0774	0.5719	0.3266	74.53	89.35	2761461	6612099	1073.72	6533612	1484291	994393	140539	1628023	58	275	7038.5
Región del Libertador Bernardo O'Higgins	Cachapoal	Pichidegua	6	Centro	0.305218	320	19714	0.11553	0.471898	0.107842	0.536319	0.264482	0.05874	0.0326164	0.8348	0.0713	0.5692	0.3235	82.94	85.31	1681314	4473392	235.48	4910890	875991	424929	198907	2867055	48	1802	12925
Región del Libertador Bernardo O'Higgins	Cardenal Caro	Pichilemu	6	Centro	0.368373	749	16394	0.107822	0.787056	0.11492	0.40954	0.304441	0.13877	0.0323289	0.8645	0.12	0.7037	0.4179	70.62	80.96	3790575	12992928	704.34	12773907	1407619	174561	305709	9357619	115	1802	12925
Región de Ñuble	Diguillín	Pinto	16	Centro	0.401903	1164	10827	0.158446	0.50411	0.0994735	0.510853	0.265355	0.0812783	0.0430405	0.5892	0.0696	0.6165	0.2935	77.08	94.64	1383343	4978534	503.41	6023288	776258	118836	192816	2384148	69	2469	8760.34
Región Metropolitana de Santiago	Cordillera	Pirque	13	Centro	0.301507	445	26521	0.0924662	0.440029	0.106067	0.348215	0.319822	0.1877	0.0381961	0.8501	0.0926	0.6734	0.3756	89.38	73.81	2799692	8793777	271.97	8467523	3612093	1739091	764682	1177422	92	3502	13144.3
Región de La Araucanía	Cautín	Pitrufquén	9	Sur	0.510373	581	24837	0.159322	0.66558	0.106575	0.45859	0.306398	0.0961066	0.0323308	0.7678	0.0788	0.7017	0.3488	93.65	85.65	2275618	5348866	227.45	5969463	675806	210445	184549	4304153	193	6266	10810.4
Región del Libertador Bernardo O'Higgins	Colchagua	Placilla	6	Centro	0.337054	147	8738	0.126433	0.271801	0.108263	0.515907	0.273518	0.0680934	0.0342184	0.7703	0.0638	0.5764	0.3048	88.43	93.88	1458024	3179125	396.14	3644122	505285	201480	144621	1725602	22	1802	12925
Región de Ñuble	Itata	Portezuelo	16	Centro	0.34574	282	4862	0.174213	0.371041	0.105718	0.573838	0.220485	0.061086	0.0388729	0.5408	0.0423	0.616	0.2415	72.06	92.96	1188230	3060420	702.31	3458862	124094	13999	66858	2048494	98	2469	8760.34
Región de Magallanes y Antártica Chilena	Tierra del Fuego	Porvenir	12	Sur	0.380702	9707	6801	0.0820856	0.891339	0.0968975	0.427143	0.350684	0.106602	0.0186737	0.9243	0.1707	0.6133	0.4592	67.66	74.09	1784426	3512748	501.82	3724026	559488	505065	54039	1999791	9	897	29091.7
Región de Tarapacá	Tamarugal	Pozo Almonte	1	Norte	0.235243	13766	15711	0.156546	0.642543	0.122016	0.379479	0.381007	0.0838903	0.033607	0.755	0.0953	0.5812	0.3471	88.73	82.86	3642207	12321376	712.44	12719168	2327479	1808614	322765	2674476	58	275	7038.5
Región de Magallanes y Antártica Chilena	Tierra del Fuego	Primavera	12	Sur	0.328362	6530	1158	0.083823	0	0.0440415	0.297064	0.479275	0.174439	0.00518135	0.6325	0.1962	0.6139	0.4239	57.07	98.75	912565	1395516	3117.52	2147971	146776	138535	8241	1220245	2	897	29091.7
Región Metropolitana de Santiago	Santiago	Providencia	13	Centro	0.546137	14	142079	0.0362805	1	0.0748034	0.114127	0.19991	0.583915	0.0272454	0.9847	0.7764	0.878	0.8756	86.72	58.1	28692364	130403643	846.28	135440870	48714668	17536304	5788248	2775794	182	3502	13144.3
Región de La Araucanía	Cautín	Pucón	9	Sur	0.549812	1249	28523	0.152705	0.643481	0.10623	0.389721	0.321039	0.143358	0.0396522	0.7521	0.1279	0.695	0.4059	86.87	64.41	4135604	9999021	379.63	11408499	3161703	410317	409568	2012679	195	6266	10810.4
Región Metropolitana de Santiago	Santiago	Pudahuel	13	Centro	0.376998	197	230293	0.0887864	0.981958	0.106351	0.35711	0.367897	0.13452	0.0341217	0.9094	0.2498	0.7401	0.5519	81.07	65.76	10634852	85787235	342.9	87990105	27841511	13547361	1179158	16707377	21	3502	13144.3
Región Metropolitana de Santiago	Cordillera	Puente Alto	13	Centro	0.43471	88	568106	0.0798621	0.999979	0.108582	0.340804	0.374043	0.142271	0.0342999	0.9457	0.2179	0.7589	0.5388	80.51	59.69	29436972	94542684	156.62	102589030	14146257	3883409	4809575	67448870	32	3502	13144.3
Región de Los Lagos	Llanquihue	Puerto Montt	10	Sur	0.460729	1673	245902	0.104659	0.895247	0.110207	0.390952	0.319839	0.150052	0.0289506	0.8594	0.2419	0.7703	0.543	85.57	70.28	16872132	56318575	217.07	59164863	19759455	8926301	3483721	20278040	695	3026	14306.6
Región de Los Lagos	Osorno	Puerto Octay	10	Sur	0.257633	1796	8999	0.138164	0.228136	0.104789	0.55295	0.24336	0.0646739	0.034226	0.569	0.0687	0.6385	0.2922	79.48	78.91	1183389	3339101	381.53	3494391	778124	108090	154086	1487852	33	3026	14306.6
Región de Los Lagos	Llanquihue	Puerto Varas	10	Sur	0.419762	4065	44578	0.0844754	0.722554	0.116627	0.362847	0.266948	0.219346	0.0342321	0.79	0.2187	0.7759	0.5118	80.43	90.24	5088172	13039413	262.29	12939459	5794792	1983447	742979	1787243	265	3026	14306.6
Región del Libertador Bernardo O'Higgins	Colchagua	Pumanque	6	Centro	0.302802	441	3421	0.129947	0	0.115171	0.566501	0.236481	0.0666472	0.0152002	0.7015	0.0512	0.5712	0.2738	74.32	98.92	892388	2855598	850.77	3004923	333360	70670	162129	1426796	10	1802	12925
Región de Coquimbo	Limarí	Punitaqui	4	Centro	0.326472	1339	10956	0.145414	0.533771	0.132986	0.500365	0.268711	0.0498357	0.0481015	0.5965	0.0524	0.6561	0.2736	75.75	53.93	1421694	4075944	299.84	3679385	336017	120546	131149	2287342	36	1588	6204.9
Región de Magallanes y Antártica Chilena	Magallanes	Punta Arenas	12	Sur	0.499485	17846	131592	0.0537367	0.956988	0.0940103	0.338524	0.366086	0.178681	0.0226989	0.9538	0.2726	0.7581	0.5819	90.78	85.44	11721441	54338839	362.5	51912129	11511726	5558796	1180381	8334081	655	897	29091.7
Región de Los Lagos	Chiloé	Puqueldón	10	Sur	0.38527	97	3921	0.106525	0	0.0913032	0.646519	0.201479	0.0471818	0.013517	0.4572	0.0546	0.6121	0.2481	81.73	100	1334412	4485498	978.42	4108381	155760	109608	40616	1666974	15	3026	14306.6
Región de La Araucanía	Malleco	Purén	9	Sur	0.4688	465	11779	0.215841	0.639528	0.133882	0.541557	0.235674	0.0717378	0.0171492	0.7115	0.0559	0.5898	0.2863	90.49	78.78	2369336	3988759	368.37	4481935	191598	34302	99325	3087361	31	6266	10810.4
Región de Los Lagos	Osorno	Purranque	10	Sur	0.443456	1459	20369	0.115975	0.707104	0.115028	0.518386	0.25259	0.0842457	0.0297511	0.7885	0.1108	0.668	0.3879	84.18	88.27	1933686	5048192	252.93	5326787	1169893	253432	381334	2712254	17	3026	14306.6
Región de Valparaíso	San Felipe de Aconcagua	Putaendo	5	Centro	0.464175	1474	16754	0.134742	0.401934	0.120628	0.447714	0.309598	0.0968127	0.0252477	0.8518	0.0656	0.6171	0.3255	67.48	96.54	1795019	4287468	252.01	4477722	345217	68152	172049	2847397	45	2714	16976.3
Región de Arica y Parinacota	Parinacota	Putre	15	Norte	0.299767	5903	2765	0.204489	0.7783	0.0705244	0.351537	0.439783	0.112839	0.0253165	0.5063	0.065	0.534	0.26	67.38	72.97	1526362	4264938	1340.55	3399628	129102	36614	75622	2212509	1	103	3620.44
Región de Los Lagos	Chiloé	Queilén	10	Sur	0.405134	333	5385	0.141203	0.431383	0.10325	0.629341	0.192758	0.0670381	0.00761374	0.4764	0.0973	0.5961	0.3023	115.01	89.47	1165368	3741915	705.55	3913684	114002	43496	26830	2025228	17	3026	14306.6
Región de Los Lagos	Chiloé	Quellón	10	Sur	0.360495	3244	27192	0.118903	0.655119	0.117056	0.534569	0.251287	0.0685496	0.0285378	0.6246	0.1146	0.6645	0.3623	92.42	71.78	2997486	14902748	506.57	14963022	1207818	816053	184424	3702115	29	3026	14306.6
Región de Los Lagos	Chiloé	Quemchi	10	Sur	0.414387	440	8352	0.10029	0.300766	0.0883621	0.631705	0.198156	0.0458573	0.0359195	0.4429	0.0698	0.6004	0.2648	83.19	63.05	1873384	4063145	460.28	4040759	162437	87878	50966	2655231	39	3026	14306.6
Región del Bío-Bío	Biobío	Quilaco	8	Centro	0.350827	1124	3988	0.196721	0.468907	0.117101	0.524825	0.265547	0.0659478	0.0265797	0.6459	0.0612	0.5833	0.2847	60.48	87.13	1043440	2515910	771.71	3230374	237101	32280	67159	1550173	31	2920	10796.8
Región Metropolitana de Santiago	Santiago	Quilicura	13	Centro	0.576375	58	210410	0.0852541	0.997377	0.10922	0.342346	0.386707	0.124923	0.0368043	0.9486	0.2669	0.7574	0.5767	65.41	84.83	13584790	47186545	203.6	53342160	30401802	19408066	1841338	8871421	16	3502	13144.3
Región del Bío-Bío	Biobío	Quilleco	8	Centro	0.290922	1122	9587	0.183661	0.582664	0.106394	0.531658	0.289455	0.0515281	0.0209659	0.6637	0.0422	0.5625	0.2506	66.42	76.85	1381659	3544197	381.86	3827372	373433	46808	89386	2197359	9	2920	10796.8
Región de Ñuble	Diguillín	Quillón	16	Centro	0.293332	423	17485	0.168117	0.596111	0.109065	0.502316	0.280412	0.0749786	0.0332285	0.6286	0.0648	0.6594	0.2995	71.31	87.52	2939987	7307532	458.95	8685076	551154	87052	230550	6833503	185	2469	8760.34
Región de Valparaíso	Quillota	Quillota	5	Centro	0.577632	302	90517	0.101879	0.865373	0.109007	0.378945	0.34272	0.145221	0.024106	0.8993	0.1944	0.7675	0.512	90.55	66.56	8077488	17896374	178.01	17544566	3504725	1247003	857880	8189330	400	2714	16976.3
Región de Valparaíso	Marga Marga	Quilpué	5	Centro	0.513719	537	151708	0.0926704	0.986078	0.0901732	0.298158	0.367548	0.205764	0.0383566	0.9281	0.2396	0.758	0.5524	88.04	51.41	8371825	45650412	264.86	44742553	5326088	1233478	1518406	13387296	146	2714	16976.3
Región de Los Lagos	Chiloé	Quinchao	10	Sur	0.311423	161	8088	0.142375	0.396761	0.0900099	0.58049	0.207344	0.0934718	0.0286845	0.4733	0.0723	0.7351	0.293	88.55	88.04	2073913	6784546	802.23	6636087	154799	78534	51515	2598125	56	3026	14306.6
Región del Libertador Bernardo O'Higgins	Cachapoal	Quinta De Tilcoco	6	Centro	0.278252	93	13002	0.130751	0.55976	0.103369	0.51269	0.292494	0.0711429	0.0203046	0.8273	0.0728	0.6607	0.3415	75.15	92.79	1426543	3752761	286.73	4012719	616080	230725	213343	2016743	71	1802	12925
Región Metropolitana de Santiago	Santiago	Quinta Normal	13	Centro	0.360011	12	110026	0.0915942	1	0.0920782	0.321451	0.40026	0.14702	0.0391907	0.938	0.246	0.6731	0.5375	79.09	80.75	6859214	29452071	207.6	28836293	6022392	2997084	1011005	4829348	33	3502	13144.3
Región de Valparaíso	Valparaíso	Quintero	5	Centro	0.423802	148	31923	0.136228	0.842151	0.111362	0.369232	0.344986	0.13495	0.03947	0.7947	0.1062	0.6561	0.3812	89.51	92.82	3121934	15503601	404.92	14909673	2274031	867942	489999	10217650	78	2714	16976.3
Región de Ñuble	Itata	Quirihue	16	Centro	0.287885	589	11594	0.148812	0.81706	0.109453	0.512162	0.258582	0.0934104	0.026393	0.7316	0.0411	0.6963	0.2757	81.22	76.74	1699568	4260585	353	4311556	303393	61621	114285	2862685	69	2469	8760.34
Región de Ñuble	Itata	Ránquil	16	Centro	0.491285	248	5755	0.152763	0.27576	0.107211	0.539878	0.24848	0.0740226	0.0304083	0.7139	0.0409	0.5939	0.2587	75.81	78.45	1204400	3561608	586.18	3678282	612647	135210	155367	1858712	159	2469	8760.34
Región del Maule	Curicó	Rauco	7	Centro	0.398505	309	10484	0.139598	0.527566	0.124571	0.514784	0.278043	0.0656238	0.0169783	0.7679	0.0628	0.5957	0.3062	80.05	73.11	1000294	3904690	349.61	3979940	707748	55158	499667	1911766	74	3202	11350.2
Región Metropolitana de Santiago	Santiago	Recoleta	13	Centro	0.374215	16	157851	0.132444	1	0.0993469	0.345547	0.379896	0.135134	0.0400758	0.9023	0.2311	0.7463	0.5379	86.02	72	9794930	35948667	178.05	34471310	18883693	14514665	1101979	5243711	42	3502	13144.3
Región de La Araucanía	Malleco	Renaico	9	Sur	0.376368	267	10250	0.17854	0.814829	0.127122	0.489268	0.287415	0.0596098	0.0365854	0.7853	0.0667	0.5733	0.3108	83.88	89.82	1945213	3932408	396.82	4318992	454281	233421	83782	2321179	60	6266	10810.4
Región Metropolitana de Santiago	Santiago	Renca	13	Centro	0.434833	24	147151	0.101884	1	0.11866	0.403348	0.363409	0.0717086	0.0428743	0.9395	0.1728	0.6734	0.4782	90.85	69.18	10389477	52236566	322.92	52300276	13877327	7829339	2168052	7912032	11	3502	13144.3
Región del Libertador Bernardo O'Higgins	Cachapoal	Rengo	6	Centro	0.429309	592	58825	0.105161	0.781062	0.112656	0.458172	0.301845	0.0983425	0.0289843	0.8753	0.1175	0.6919	0.4143	86.35	73.81	4430931	10552702	173.72	11172291	2922820	1394788	424571	5660749	129	1802	12925
Región del Libertador Bernardo O'Higgins	Cachapoal	Requínoa	6	Centro	0.220463	673	27968	0.104759	0.582201	0.111306	0.465961	0.284075	0.097397	0.0412614	0.8915	0.0888	0.6273	0.3676	68.53	92.13	2044398	6308949	206.04	6335383	2656617	1102110	354611	2009484	35	1802	12925
Región del Maule	Linares	Retiro	7	Centro	0.376868	827	19974	0.169994	0.35361	0.122559	0.560779	0.243366	0.0471613	0.026134	0.6769	0.0821	0.6368	0.3283	81.88	64.37	1277556	4739396	231.45	4905421	969743	457918	171313	3034205	107	3202	11350.2
Región de Los Ríos	Ranco	Río Bueno	14	Sur	0.365512	2212	31372	0.135706	0.546443	0.113413	0.494804	0.269285	0.0772026	0.0452952	0.646	0.1161	0.6801	0.3709	90.78	81.01	2847453	7164664	225.31	7424686	1245078	158576	337199	3962026	26	1056	4199.22
Región del Maule	Talca	Río Claro	7	Centro	0.36305	431	13906	0.126272	0.317345	0.126492	0.555156	0.242126	0.0437941	0.032432	0.7962	0.0561	0.5777	0.2955	95.15	85.11	1841731	9223726	607.57	9027890	2518549	265108	1989837	1901406	42	3202	11350.2
Región de Coquimbo	Limarí	Río Hurtado	4	Centro	0.199124	2117	4278	0.129731	0	0.137447	0.552828	0.228611	0.0617111	0.0194016	0.7163	0.0331	0.5525	0.2358	70.12	98.35	1263642	3458502	723.97	3157246	210498	9125	175260	1843235	7	1588	6204.9
Región de Aysén del Gral. Ibáñez del Campo	General Carrera	Río Ibáñez	11	Sur	0.339736	5997	2666	0.145237	0	0.128657	0.498125	0.231433	0.109527	0.0322581	0.8124	0.1112	0.5461	0.3668	60.59	93.63	1472304	3056699	1416.85	3832585	139857	39622	57970	1821004	26	758	14502.9
Región de Los Lagos	Osorno	Río Negro	10	Sur	0.387982	1266	14085	0.133392	0.495847	0.110117	0.524317	0.260348	0.0683706	0.0368477	0.6618	0.0963	0.6659	0.3488	69.59	84.56	1341259	3670340	278.94	3969034	672030	123380	168328	2079231	45	3026	14306.6
Región de Magallanes y Antártica Chilena	Magallanes	Río Verde	12	Sur	0.390515	17248	617	0.131809	0	0.0226904	0.296596	0.468396	0.207455	0.00486224	0.5461	0.0417	0.0263	0.0844	40.3	90	874753	2028607	11821.5	2506155	279435	78707	60224	1160376	0	897	29091.7
Región del Maule	Curicó	Romeral	7	Centro	0.27498	1597	15187	0.119794	0.429907	0.122671	0.500099	0.279779	0.0749984	0.0224534	0.7872	0.1063	0.671	0.3829	89.64	97.33	1915910	5779451	328.09	5370852	1665022	673597	448250	1767337	135	3202	11350.2
Región de La Araucanía	Cautín	Saavedra	9	Sur	0.464037	401	12450	0.223607	0.219197	0.132932	0.564659	0.21494	0.0474699	0.04	0.3374	0.0283	0.5742	0.1764	77.04	92.04	2444196	4835225	423.12	5400652	135129	30499	72890	4089828	6	6266	10810.4
Región del Maule	Curicó	Sagrada Familia	7	Centro	0.350827	549	18544	0.112376	0.425259	0.11799	0.536724	0.259868	0.0599116	0.0255069	0.7805	0.0659	0.5953	0.3129	87.47	84.68	2200565	7316004	385.78	7544330	2014147	885653	605245	2536749	60	3202	11350.2
Región de Coquimbo	Choapa	Salamanca	4	Centro	0.414879	3445	29347	0.0960137	0.572563	0.113811	0.439364	0.312775	0.101237	0.0328143	0.8089	0.0845	0.6206	0.3487	99.65	62.19	4014688	9589535	285.2	8373210	1998558	1243257	408398	3276463	117	1588	6204.9
Región de Valparaíso	San Antonio	San Antonio	5	Centro	0.611787	405	91350	0.116031	0.947663	0.108123	0.371834	0.368812	0.111341	0.0398905	0.907	0.1781	0.6762	0.478	84.92	76.51	8335162	24111382	247.31	24068543	5557845	2642082	723168	9732709	33	2714	16976.3
Región Metropolitana de Santiago	Maipo	San Bernardo	13	Centro	0.437523	155	301313	0.106935	0.98319	0.117137	0.378347	0.355418	0.108286	0.0408114	0.9137	0.2129	0.7227	0.52	89.85	47.55	14055630	56934545	168.4	57096413	19279008	10089279	2018895	20262855	26	3502	13144.3
Región de Ñuble	Punilla	San Carlos	16	Centro	0.297754	874	53024	0.145027	0.627282	0.117852	0.473106	0.286474	0.0907702	0.0317969	0.81	0.1168	0.7026	0.4051	65.17	70.63	3853176	10234914	325.8	18407343	1661818	438184	385682	7901719	454	2469	8760.34
Región del Maule	Talca	San Clemente	7	Centro	0.471861	4504	43269	0.14945	0.500728	0.128129	0.512492	0.266218	0.060667	0.0324944	0.7802	0.0772	0.6432	0.3384	85.45	80.19	3830518	10292263	223.27	10438287	1882829	831739	426569	6068234	79	3202	11350.2
Región de Valparaíso	Los Andes	San Esteban	5	Centro	0.484078	1362	18855	0.107809	0.603129	0.120233	0.399947	0.327075	0.115248	0.0374967	0.8689	0.125	0.5556	0.3922	72.42	74.86	1683420	4360329	239.58	5019649	807881	137626	300791	2575315	36	2714	16976.3
Región de Ñuble	Punilla	San Fabián	16	Centro	0.268502	1568	4308	0.187217	0.393222	0.153668	0.487465	0.243733	0.0909935	0.0241411	0.7776	0.0462	0.6091	0.2796	88.31	98.2	1077299	2686981	564.31	2648297	307001	109391	91040	1606257	100	2469	8760.34
Región de Valparaíso	San Felipe de Aconcagua	San Felipe	5	Centro	0.542172	186	76844	0.109931	0.905952	0.11198	0.364908	0.343878	0.143355	0.0358779	0.9163	0.1939	0.7682	0.5149	74.31	58.68	4975659	13723296	168.59	14236431	3137781	1121249	661294	6983125	205	2714	16976.3
Región del Libertador Bernardo O'Higgins	Colchagua	San Fernando	6	Centro	0.47217	2441	73973	0.089203	0.861287	0.113109	0.397334	0.33788	0.118814	0.0328633	0.8843	0.1721	0.7817	0.4918	86.21	66.93	4798560	14706047	204.54	16230532	4894161	1843124	810881	5999731	201	1802	12925
Región de Magallanes y Antártica Chilena	Magallanes	San Gregorio	12	Sur	0.390826	6884	799	0.0783495	0	0.0450563	0.302879	0.438048	0.195244	0.0187735	0.6851	0.0564	0.6406	0.2914	58.68	88	674221	1387815	2361.49	1591646	242014	125294	8439	1171014	1	897	29091.7
Región del Maule	Linares	San Javier	7	Centro	0.524936	1313	45547	0.128635	0.715064	0.122489	0.484489	0.278569	0.0852306	0.0292226	0.7629	0.1051	0.6789	0.379	87	97.46	3891686	11617844	210.97	10547338	1466488	372750	497965	6086836	48	3202	11350.2
Región Metropolitana de Santiago	Santiago	San Joaquín	13	Centro	0.51193	10	94492	0.118005	1	0.0937328	0.357967	0.378635	0.142859	0.0268065	0.9153	0.1849	0.6196	0.4715	91.12	76.17	8461119	36169780	353.24	36690922	9552286	6254737	1478780	4493019	20	3502	13144.3
Región de Los Lagos	Osorno	San Juan De La Costa	10	Sur	0.440136	1517	7512	0.222224	0.155751	0.118078	0.596912	0.190495	0.0292865	0.065229	0.1866	0.0222	0.6057	0.1359	92.98	92.31	1854122	4288481	532.74	4043486	234462	24921	151520	3124356	135	3026	14306.6
Región de Ñuble	Punilla	San Nicolás	16	Centro	0.268502	491	11603	0.101844	0.421184	0.114539	0.512798	0.273464	0.065845	0.0333534	0.709	0.0469	0.7503	0.2922	74.26	100	1798939	6105125	536.95	6583591	1139685	58323	908957	2197505	58	2469	8760.34
Región de Los Lagos	Osorno	San Pablo	10	Sur	0.345758	637	10030	0.123192	0.459521	0.110768	0.530808	0.250449	0.0637089	0.0442672	0.5825	0.0777	0.6352	0.3064	94.48	68.03	1280321	3303861	321.85	3397396	677618	158412	231930	1889343	47	3026	14306.6
Región Metropolitana de Santiago	Melipilla	San Pedro	13	Centro	0.38044	788	9726	0.132845	0	0.126362	0.499177	0.265371	0.0605593	0.0485297	0.5489	0.0572	0.5619	0.2603	70.25	96.1	1418121	3488506	291.47	3536071	514913	147287	192308	1915361	26	3502	13144.3
Región de Antofagasta	El Loa	San Pedro De Atacama	2	Norte	0.374619	23439	10996	0.145607	0.502364	0.0984904	0.267552	0.376864	0.208712	0.0483812	0.7268	0.0941	0.6262	0.3499	57.12	80.28	3195485	10646339	916.52	9783839	1055732	683615	201053	5286242	13	602	17070.9
Región del Bío-Bío	Concepción	San Pedro De La Paz	8	Centro	0.339065	113	131808	0.122246	0.999059	0.118111	0.334623	0.290642	0.234971	0.0216527	0.9052	0.2358	0.7766	0.5493	93.5	73.84	7556146	22468565	156.55	23180222	8443261	1672570	1630900	5852507	27	2920	10796.8
Región del Maule	Talca	San Rafael	7	Centro	0.353703	264	9191	0.130357	0.540529	0.136873	0.504515	0.275052	0.0577739	0.0257861	0.7911	0.0601	0.5513	0.297	78.46	83.33	1110876	2949132	334.6	3372123	506219	210023	166955	1802707	25	3202	11350.2
Región Metropolitana de Santiago	Santiago	San Ramón	13	Centro	0.319835	7	82900	0.131517	1	0.104922	0.420905	0.353788	0.0733896	0.0469964	0.9345	0.1392	0.6509	0.4392	90.7	78.07	6442103	16124546	186.46	16038685	1307361	250681	823943	10760556	2	3502	13144.3
Región del Bío-Bío	Biobío	San Rosendo	8	Centro	0.240031	92	3412	0.182054	0.851993	0.104924	0.485346	0.304513	0.0855803	0.0196366	0.7201	0.2809	0.6195	0.5004	76.79	97.4	899823	2330385	666.53	2396172	80044	6586	59368	1870733	12	2920	10796.8
Región del Libertador Bernardo O'Higgins	Cachapoal	San Vicente	6	Centro	0.317693	476	46766	0.0909061	0.560428	0.106488	0.458453	0.301993	0.0972074	0.0358594	0.8882	0.1327	0.6949	0.4343	81.38	84.64	3555103	10254828	203.6	10403759	2210603	798576	492505	5311022	80	1802	12925
Región del Bío-Bío	Biobío	Santa Bárbara	8	Centro	0.498483	1255	13773	0.196203	0.57983	0.132215	0.488202	0.283163	0.0720976	0.024323	0.7053	0.1037	0.577	0.3481	80.14	96.39	1802729	4143688	293.14	4287179	857235	431776	166546	2486660	76	2920	10796.8
Región del Libertador Bernardo O'Higgins	Colchagua	Santa Cruz	6	Centro	0.160247	420	37855	0.0765353	0.602932	0.114674	0.432598	0.306274	0.116048	0.0304055	0.8944	0.1742	0.8157	0.5027	63.76	47.45	2509841	8818417	267.69	11112117	2092275	793118	401006	3440444	111	1802	12925
Región del Bío-Bío	Concepción	Santa Juana	8	Centro	0.319921	731	13749	0.138453	0.697796	0.135501	0.503237	0.2534	0.0828424	0.02502	0.7077	0.0482	0.6423	0.2798	79.11	62.12	1938118	5177130	351.4	5207424	375771	54202	156225	3710663	68	2920	10796.8
Región de Valparaíso	San Felipe de Aconcagua	Santa María	5	Centro	0.448902	166	15241	0.122509	0.642215	0.115216	0.452857	0.326947	0.0776196	0.0273604	0.8671	0.0897	0.5999	0.3599	92.41	80.98	2063751	5382931	331.29	5479262	1069750	77759	798630	2432778	22	2714	16976.3
Región Metropolitana de Santiago	Santiago	Santiago	13	Centro	0.625502	22	404495	0.0841423	1	0.0726808	0.17327	0.327018	0.394643	0.0323885	0.8953	0.635	0.8276	0.7778	86.38	58.77	54304581	172234085	326.41	168846492	62758614	24822034	6888319	5286414	135	3502	13144.3
Región de Valparaíso	San Antonio	Santo Domingo	5	Centro	0.516022	536	10900	0.0827476	0.570275	0.106514	0.374312	0.295138	0.182294	0.0417431	0.7209	0.2668	0.6718	0.5055	75.06	82.36	4352391	17608252	1432.13	17366016	12618430	10675295	422149	1466500	227	2714	16976.3
Región de Antofagasta	Antofagasta	Sierra Gorda	2	Norte	0.423337	12886	10186	0.127895	0	0.015217	0.113784	0.569605	0.288631	0.0127626	0.8664	0.0665	0.5271	0.3119	76.67	90.12	2415391	7659080	4414.68	7822819	2732860	1958469	331902	1630465	19	602	17070.9
Región Metropolitana de Santiago	Talagante	Talagante	13	Centro	0.423389	126	74237	0.0885732	0.797567	0.112437	0.366367	0.352776	0.138745	0.0296752	0.8805	0.1489	0.7949	0.4706	88.64	91.93	4623509	13380139	159.38	13212993	3477152	834199	820359	6191974	52	3502	13144.3
Región del Maule	Talca	Talca	7	Centro	0.335046	232	220357	0.107337	0.957156	0.103178	0.345226	0.340756	0.182232	0.0286081	0.9243	0.2605	0.7915	0.5755	95.47	82.99	16988769	46252697	176.21	41997582	12428998	4525475	1901336	16610633	133	3202	11350.2
Región del Bío-Bío	Concepción	Talcahuano	8	Centro	0.409002	92	151749	0.114766	0.990583	0.0980698	0.338737	0.357623	0.177985	0.027585	0.9259	0.2879	0.769	0.5896	85.24	89.09	11075293	32353712	200.12	31688467	11989971	5223585	1584732	8413905	54	2920	10796.8
Región de La Araucanía	Cautín	Temuco	9	Sur	0.503972	464	282415	0.147726	0.931838	0.101939	0.310933	0.341203	0.214125	0.0318007	0.8872	0.2995	0.7939	0.5953	71.07	81.55	17164107	57810174	188.22	57381892	17247892	5206382	2673115	22740520	2188	6266	10810.4
Región del Maule	Curicó	Teno	7	Centro	0.387435	618	28921	0.126353	0.329587	0.125376	0.514194	0.281284	0.0569482	0.0221984	0.8101	0.0792	0.7	0.3554	72.12	87.35	2106479	6054508	213.2	6637286	1848105	647860	343869	2917448	275	3202	11350.2
Región de La Araucanía	Cautín	Teodoro Schmidt	9	Sur	0.507047	650	15045	0.218645	0.359123	0.121834	0.58099	0.218411	0.0479894	0.0307743	0.4981	0.0388	0.6051	0.227	74.4	87.1	2043234	4546077	311.07	4910005	204214	34697	81082	3537919	265	6266	10810.4
Región de Atacama	Copiapó	Tierra Amarilla	3	Norte	0.266835	11191	14019	0.12057	0.708681	0.124759	0.451173	0.345174	0.0622726	0.0166203	0.7098	0.092	0.536	0.3271	77.88	84.57	3577580	8512198	684.5	9839003	4261053	3410756	399259	1742964	22	419	4320.73
Región Metropolitana de Santiago	Chacabuco	Tiltil	13	Centro	0.444412	653	19312	0.100561	0.676781	0.111226	0.393279	0.331659	0.113867	0.0499689	0.8052	0.1107	0.5868	0.374	86.64	90.93	2276048	8204440	359.83	7838169	1539408	770961	405123	1714317	29	3502	13144.3
Región de Magallanes y Antártica Chilena	Tierra del Fuego	Timaukel	12	Sur	0.251114	10759	405	0.0517883	0	0.0395062	0.34321	0.424691	0.145679	0.0469136	0.6341	0.0658	0.001	0.0347	79.1	86.67	720273	1788793	6288.23	1766993	66169	50186	15983	1230432	0	897	29091.7
Región del Bío-Bío	Arauco	Tirúa	8	Centro	0.339961	624	10417	0.212896	0.358837	0.145339	0.55899	0.208217	0.0590381	0.0284151	0.4762	0.0419	0.5902	0.2275	31.38	60.65	1593530	3665825	340.62	3762506	149829	15848	77047	3053764	20	2920	10796.8
Región de Antofagasta	Tocopilla	Tocopilla	2	Norte	0.292022	4039	25186	0.0857402	0.977964	0.120464	0.389423	0.348805	0.0819503	0.0593584	0.8682	0.1428	0.638	0.4292	70.21	84.93	2874747	6710653	220.1	6210013	940412	451638	151193	3337697	59	602	17070.9
Región de La Araucanía	Cautín	Toltén	9	Sur	0.394079	860	9722	0.196054	0.397861	0.111911	0.566859	0.236474	0.0589385	0.0258177	0.4151	0.0467	0.6009	0.2266	70.01	83.49	1707158	3695458	385.49	3865343	194933	37492	79468	3093953	101	6266	10810.4
Región del Bío-Bío	Concepción	Tomé	8	Centro	0.398146	495	54946	0.13794	0.901613	0.102664	0.401194	0.337859	0.130364	0.0279183	0.852	0.1584	0.633	0.4404	57.44	66.24	5536040	14034443	271.26	15969726	1878255	792736	416852	10413989	247	2920	10796.8
Región de Magallanes y Antártica Chilena	Última Esperanza	Torres Del Paine	12	Sur	0.360805	6630	1209	0.0689971	0	0.0272953	0.19024	0.383788	0.381307	0.0173697	0.6592	0.064	0.5259	0.281	73.12	83.81	884571	2233714	2391.96	2487638	358958	164853	57164	1233957	4	897	29091.7
Región de Aysén del Gral. Ibáñez del Campo	Capitán Prat	Tortel	11	Sur	0.369342	19711	523	0.0593364	0	0.191205	0.357553	0.27151	0.126195	0.0535373	0.5835	0.1154	0.6581	0.3538	80.59	97.62	986221	1605854	3102.75	1787184	24820	6570	17070	1494354	0	758	14502.9
Región de La Araucanía	Malleco	Traiguén	9	Sur	0.479614	908	18843	0.182423	0.761556	0.1331	0.492756	0.257974	0.0800828	0.0360877	0.712	0.0888	0.6792	0.3502	80.62	81.19	2158345	5665820	301.54	5824264	611491	161029	149517	3794156	7	6266	10810.4
Región de Ñuble	Itata	Treguaco	16	Centro	0.213116	313	5401	0.189521	0.328458	0.113683	0.566191	0.230883	0.0548047	0.0344381	0.5501	0.0273	0.5626	0.2036	76.46	78.41	1526379	2850926	552.74	3160556	162944	17684	100911	2057905	111	2469	8760.34
Región del Bío-Bío	Biobío	Tucapel	8	Centro	0.308894	915	14134	0.143634	0.841022	0.109382	0.486133	0.298783	0.0827084	0.0229942	0.8143	0.0982	0.6361	0.3706	73.01	96.3	1891451	5178068	417.44	6375554	698515	307079	197387	2781579	116	2920	10796.8
Región de Los Ríos	Valdivia	Valdivia	14	Sur	0.486351	1016	166080	0.0979489	0.931575	0.0982599	0.322712	0.35068	0.19652	0.031828	0.8865	0.2524	0.7826	0.5594	73.94	75.84	11798267	39630498	220.23	39251140	8720877	2532027	1825820	20649936	78	1056	4199.22
Región de Atacama	Huasco	Vallenar	3	Norte	0.279418	7084	51917	0.097985	0.886396	0.130593	0.385076	0.349539	0.101701	0.0330913	0.8466	0.1305	0.7619	0.4382	93.79	88.6	5324364	11627877	205.2	11742278	1663008	572351	491756	5496184	216	419	4320.73
Región de Valparaíso	Valparaíso	Valparaíso	5	Centro	0.469681	402	296655	0.133135	0.997516	0.0938464	0.317483	0.370346	0.184413	0.0339114	0.903	0.2627	0.7397	0.5598	94.77	85.75	21723231	93728417	283.82	90091784	16621413	8249920	2175892	21950470	53	2714	16976.3
Región del Maule	Curicó	Vichuquén	7	Centro	0.437876	426	4322	0.139981	0.275336	0.0999537	0.555761	0.229755	0.0923184	0.0222119	0.654	0.0628	0.6416	0.2976	89.64	86.65	1472113	4212637	1035.01	4517831	1541407	610568	427705	1501129	63	3202	11350.2
Región de La Araucanía	Malleco	Victoria	9	Sur	0.528455	1256	34182	0.17905	0.727166	0.117811	0.443391	0.298081	0.107045	0.0336727	0.7142	0.154	0.6694	0.4191	89.06	93.11	3491555	9329829	246.2	8743021	1289225	283693	324931	5127225	263	6266	10810.4
Región de Coquimbo	Elqui	Vicuña	4	Centro	0.282608	7610	27771	0.139855	0.611897	0.121494	0.45011	0.314069	0.0808397	0.0334882	0.8554	0.074	0.637	0.3429	73.22	98.84	3493154	8058798	288.15	8641620	813416	298511	220277	5474233	25	1588	6204.9
Región de La Araucanía	Cautín	Vilcún	9	Sur	0.545688	1421	28151	0.172562	0.547831	0.119854	0.463856	0.293169	0.0796064	0.0435153	0.5578	0.0496	0.6596	0.2633	71.7	56.47	2748318	7359150	234.36	7325722	1061239	306643	224449	4826709	237	6266	10810.4
Región del Maule	Linares	Villa Alegre	7	Centro	0.397092	190	16221	0.161831	0.596511	0.111152	0.508045	0.278651	0.0672585	0.034893	0.7762	0.0775	0.56	0.3229	77.69	63.5	1526719	4240678	232.17	4099197	529275	161451	173520	2699521	23	3202	11350.2
Región de Valparaíso	Marga Marga	Villa Alemana	5	Centro	0.443007	97	126548	0.0926377	0.990352	0.0989743	0.307559	0.377019	0.184483	0.0319642	0.9336	0.1837	0.7629	0.5077	76.56	68.28	6508116	21967441	154.69	21892382	2683876	461091	942248	12902657	79	2714	16976.3
Región de La Araucanía	Cautín	Villarrica	9	Sur	0.537801	1291	55478	0.151404	0.657558	0.10898	0.425196	0.310808	0.120733	0.0342839	0.73	0.1215	0.7848	0.4113	79.12	73.83	5599239	12906092	242.21	14424802	4422002	1123928	639191	4903429	147	6266	10810.4
Región del Maule	Linares	Yerbas Buenas	7	Centro	0.392903	262	18081	0.166508	0.342182	0.119905	0.559538	0.246004	0.0449643	0.0295891	0.7257	0.0605	0.6115	0.2995	87.9	68.05	2063472	4675417	236.4	4578152	999423	456964	228675	2650148	145	3202	11350.2
Región del Bío-Bío	Biobío	Yumbel	8	Centro	0.374832	727	21198	0.164956	0.599632	0.11001	0.491744	0.282385	0.0852911	0.0305689	0.6763	0.0689	0.6493	0.3116	84.49	70.24	2324828	8114554	358.95	7953634	475217	89044	214391	5714549	101	2920	10796.8
Región de Ñuble	Diguillín	Yungay	16	Centro	0.365309	824	17787	0.113573	0.747906	0.104065	0.477821	0.309046	0.0841626	0.0249058	0.7409	0.0939	0.6953	0.3644	82.26	84.69	1961041	5226933	293.17	5473430	786466	253212	165113	3956112	52	2469	8760.34
Región de Valparaíso	Petorca	Zapallar	5	Centro	0.507552	288	7339	0.0858113	0.683063	0.0979697	0.420085	0.312985	0.136803	0.032157	0.8587	0.1959	0.7033	0.491	82.68	73.63	5770439	19559918	2382.44	19297725	12790139	5728899	1680553	1291847	71	2714	16976.3

## Sheet: Regiones
Etiquetas de fila	Suma de Nº de Permisos de Edificación Entregados	Suma de Disponibilidad Presupuestaria Municipal por Habitante en M$	Promedio de Indice_5	Suma de Tamaño	Suma de Cantidad_Poblacional	Promedio de %_POBREZA_POR_INGRESO	Promedio de Densidad_Poblacional	Promedio de %_POBLACIÓN_URBANA	Promedio de %_SIN_ESCOLARIDAD	Promedio de %_BÁSICA	Promedio de %_MEDIA	Promedio de %_SUPERIOR	Promedio de BIENESTAR	Promedio de ECONOMÍA	Promedio de EDUCACIÓN	Promedio de IDC	Promedio de Porcentaje de Ejecución Presupuestaria Devengada Municipal (2021)	Promedio de Eficiencia Cobro Patentes Municipales en %	Suma de Gastos en Personal Municipal (M$)	Suma de Gastos Municipales (Gastos Total Devengado) (M$)	Suma de Ingresos Municipales (Ingreso Total Percibido) en M$	Suma de Ingresos por Impuestos en M$	Suma de Ingresos por Patentes Municipales de Beneficio Municipal en M$	Suma de Ingresos por Permisos de Circulación de Beneficio Municipal en M$	Suma de Ingresos por Fondo Común Municipal en M$
Región de La Araucanía	6266	10810.4	0.479984	31277	915969	0.192488	46.2226	0.579334	0.124078	0.490853	0.270108	0.0779402	0.626394	0.0758548	0.632694	0.302171	76.5868	83.8245	100266801	256422251	270882763	43454890	11884175	9697733	142012726
Región de Valparaíso	2714	16976.3	0.477247	15155	1385485	0.116321	212.341	0.757953	0.108194	0.392124	0.33582	0.12877	0.861403	0.139544	0.674606	0.424553	80.3962	74.7409	133236920	454370419	451245877	103191913	44504263	21449873	179409999
Región Metropolitana de Santiago	3502	13144.3	0.440327	8979	6678547	0.0981725	5785.07	0.89632	0.105217	0.350151	0.336045	0.172775	0.901338	0.218382	0.710789	0.501424	86.17	73.9938	541940565	2287670292	2277126403	696547227	299452656	90851076	462786833
Región de Aysén del Gral. Ibáñez del Campo	758	14502.9	0.392768	106487	103158	0.0725441	1.39	0.473223	0.13017	0.445705	0.276165	0.117751	0.81543	0.13834	0.60947	0.40593	75.789	82.172	21046243	46869273	50174715	6011104	2524313	1225494	26810687
Región de Los Lagos	3026	14306.6	0.391945	43076	813018	0.128022	30.9429	0.523252	0.104876	0.527843	0.249427	0.0885623	0.633207	0.113339	0.656239	0.353554	84.0396	83.7771	82036633	268979188	275491326	53491057	22157464	9946404	103959261
Región del Bío-Bío	2920	10796.8	0.38607	21962	1527178	0.154902	297.634	0.746666	0.120811	0.453956	0.293772	0.103886	0.752056	0.131231	0.661478	0.391294	77.6897	77.7963	120885823	370090318	374226683	85815933	30864945	17906234	167221858
Región de Magallanes y Antártica Chilena	897	29091.7	0.376168	147079	166121	0.0718911	1.05556	0.405529	0.0662677	0.325484	0.399596	0.188422	0.770411	0.127611	0.499678	0.336056	69.5611	84.4789	23026818	82112731	82072154	14880204	7720284	1579183	22964659
Región de Los Ríos	1056	4199.22	0.367945	18431	384837	0.140602	27.3167	0.578315	0.117412	0.479139	0.28162	0.0809438	0.668575	0.105458	0.65815	0.354683	84.2575	77.4083	37494568	114769760	116661001	20432720	6018975	5036086	58938559
Región del Libertador Bernardo O'Higgins	1802	12925	0.367284	16128	672781	0.112162	73.8437	0.548294	0.112809	0.48549	0.285143	0.0880213	0.820628	0.08725	0.635672	0.352047	81.3394	84.0587	68663190	197229816	208877893	47043546	18967051	11366025	93111830
Región del Maule	3202	11350.2	0.364499	29342	1036705	0.135892	69.3172	0.566888	0.121461	0.502575	0.267799	0.079624	0.760321	0.090769	0.648907	0.348176	84.2545	81.3248	88551544	276218528	278827951	58775706	18799898	17932013	134611448
Región de Antofagasta	602	17070.9	0.309994	105644	594217	0.122861	4.2875	0.642474	0.0916685	0.297451	0.411903	0.158474	0.845162	0.1456	0.61515	0.41075	72.1263	85.1113	38476628	204108683	209111733	56168170	26444188	7660036	31428454
Región de Arica y Parinacota	103	3620.44	0.299247	12946	224813	0.193626	15.6667	0.568245	0.128029	0.357643	0.373349	0.10931	0.553833	0.1064	0.603233	0.3148	66.01	84.75	22087355	49411741	50625662	9516887	3670208	1394878	24829697
Región de Coquimbo	1588	6204.9	0.297164	40580	757586	0.129465	26.4933	0.547484	0.126251	0.463695	0.292116	0.0862065	0.75876	0.0879867	0.644313	0.33782	83.1353	79.388	76834435	228257749	228011526	42632261	13085821	9434919	88590602
Región de Atacama	419	4320.73	0.294526	75177	286168	0.103192	3.78889	0.761857	0.127137	0.400734	0.345079	0.0973585	0.808322	0.108344	0.625844	0.3737	80.5744	80.6311	34593336	97499620	99081316	20231961	10414142	4147936	34058349
Región de Ñuble	2469	8760.34	0.291837	12814	464530	0.156477	46.525	0.507036	0.113019	0.516571	0.259673	0.0809247	0.660605	0.0695	0.64571	0.30115	76.9185	86.435	47080246	129699263	160932303	21642991	5935132	6086388	80240724
Región de Tarapacá	275	7038.5	0.261849	42226	330558	0.178755	39.4286	0.49058	0.123756	0.379444	0.330949	0.110815	0.6791	0.104043	0.6012	0.333014	80.9486	84.32	31837418	116611449	123458425	29602247	14840305	2717084	22997761

## Sheet: Provincias
Provincia	Promedio de Indice_5	Suma de Tamaño	Suma de Cantidad_Poblacional	Promedio de %_POBREZA_POR_INGRESO	Promedio de Densidad_Poblacional	Promedio de %_POBLACIÓN_URBANA	Promedio de %_SIN_ESCOLARIDAD	Promedio de %_BÁSICA	Promedio de %_MEDIA	Promedio de %_SUPERIOR	Promedio de %_NIVEL_IGNORADO	Promedio de BIENESTAR	Promedio de ECONOMÍA	Promedio de EDUCACIÓN	Promedio de IDC	Promedio de Porcentaje de Ejecución Presupuestaria Devengada Municipal (2021)	Promedio de Eficiencia Cobro Patentes Municipales en %	Suma de Gastos en Personal Municipal (M$)	Suma de Gastos Municipales (Gastos Total Devengado) (M$)	Suma de Disponibilidad Presupuestaria Municipal por Habitante en M$
Antártica Chilena	0.409292	21551	2063	0.0313887	0.1	0.908386	0.127969	0.313621	0.359186	0.184682	0.0145419	0.9537	0.0766	0.642	0.3606	70.11	80.19	1309030	2983414	1726.34
Antofagasta	0.442954	47408	385526	0.112647	5.46667	0.646813	0.073251	0.25218	0.458452	0.183756	0.0323606	0.889333	0.1772	0.6136	0.442033	77.4933	80.9767	21262987	127432552	5268.37
Arauco	0.405679	5456	166087	0.168004	29.7	0.704137	0.130533	0.499495	0.259299	0.079067	0.0316054	0.725157	0.109471	0.651514	0.367071	71.0243	77.6514	17123819	49420047	2339.52
Arica	0.385762	4799	221364	0.11756	46.2	0.926433	0.11327	0.325193	0.377631	0.144915	0.0389901	0.8896	0.2322	0.763	0.5401	72.32	81.28	19930204	43116505	181.53
Aysén	0.447747	46509.6	32319	0.0751612	1.36667	0.801336	0.107873	0.482795	0.28332	0.10913	0.0168828	0.868167	0.1704	0.6507	0.4559	80.5133	72.41	8123921	15146966	2818.48
Biobío	0.363156	13064	365433	0.169614	32.6923	0.627464	0.126188	0.484244	0.285637	0.0775574	0.0263733	0.686208	0.100669	0.629108	0.339962	77.2131	80.0915	33045962	95704254	5541.29
Cachapoal	0.363607	7125	404359	0.108926	110.013	0.645989	0.111203	0.469096	0.29636	0.0927341	0.0306062	0.84565	0.0954375	0.636938	0.368281	82.3044	85.7594	36245156	98741689	4096.65
Capitán Prat	0.380088	36393	4638	0.0572093	0.166667	0.271347	0.159968	0.386511	0.281832	0.130681	0.0410083	0.7317	0.114667	0.608167	0.3684	69.0367	92.68	3067431	6539069	6664.33
Cardenal Caro	0.399062	3325	45866	0.115426	14.0333	0.407808	0.111125	0.51115	0.260583	0.0912363	0.0259047	0.764617	0.0639	0.607383	0.304033	81.3533	86.3733	11935635	41593967	5232.81
Cauquenes	0.338105	3027	56940	0.148393	18.8	0.599011	0.122041	0.52415	0.238341	0.0817194	0.033749	0.667033	0.0771333	0.6151	0.311367	83.66	80.6267	5963731	19178370	1504.65
Cautín	0.485643	17844	710845	0.191492	60.595	0.537226	0.118376	0.484626	0.277923	0.0818125	0.0372619	0.61056	0.075315	0.64162	0.298955	75.9935	81.3725	72433934	189942695	6646.74
Chacabuco	0.435439	1624	165519	0.0932135	90.05	0.74199	0.126188	0.385293	0.300249	0.146673	0.0415979	0.84535	0.1557	0.6849	0.4461	89.605	81	12147746	68504778	685.11
Chañaral	0.340009	24436	26144	0.0909981	1.4	0.929458	0.11999	0.385391	0.367625	0.110788	0.0162069	0.86295	0.1221	0.63465	0.4046	72.425	87.41	5419825	13851730	1167.25
Chiloé	0.375961	9181	168185	0.12163	32.11	0.448268	0.0984642	0.562817	0.235345	0.0767877	0.0265858	0.57232	0.10213	0.65043	0.33244	89	79.188	24091923	105737375	6857.95
Choapa	0.288118	10132	90670	0.127471	8.95	0.567503	0.128651	0.472459	0.281728	0.0865174	0.0306453	0.736625	0.069825	0.63325	0.31565	85.155	72.1475	12625944	29415299	1302.52
Colchagua	0.3541	5678	222556	0.115381	51.86	0.476275	0.116387	0.496325	0.281932	0.0785517	0.0268036	0.8142	0.08816	0.65062	0.35488	79.787	79.949	20482399	56894160	3595.49
Concepción	0.399455	3442	995658	0.131321	740.95	0.900609	0.109315	0.394579	0.322694	0.146885	0.0265258	0.839083	0.177033	0.702358	0.461033	82.0942	75.3942	70716042	224966017	2916.03
Copiapó	0.261741	32539	185618	0.101941	4.9	0.860838	0.120765	0.394939	0.348125	0.108246	0.0279246	0.821967	0.139467	0.643433	0.4126	87.0133	76.8967	19181862	60442372	1467.65
Cordillera	0.368109	533	594627	0.0861642	3249.55	0.720004	0.107324	0.34451	0.346932	0.164986	0.036248	0.8979	0.15525	0.71615	0.4572	84.945	66.75	32236664	103336461	428.59
Coyhaique	0.421516	11850.2	58670	0.0597565	4.05	0.432115	0.132038	0.446419	0.284903	0.112509	0.0241306	0.82905	0.1477	0.59495	0.4113	89.035	73.98	6471785	18202106	2663.92
Curicó	0.381889	7281	288880	0.125064	35.0556	0.558803	0.117592	0.500749	0.273659	0.0847378	0.0232627	0.773922	0.0914667	0.660678	0.354756	83.5	85.6178	25363618	79144634	3988.77
Diguillín	0.332954	4866	303730	0.151652	82.9875	0.646564	0.108614	0.485446	0.285955	0.0927192	0.0272645	0.692388	0.0938625	0.652075	0.342212	76.6238	85.7362	26692973	74020954	2915.58
El Loa	0.218478	42000	177048	0.127743	3.73333	0.486218	0.1074	0.313543	0.368764	0.160109	0.0501837	0.763867	0.133367	0.606467	0.3854	68.59	88.43	12810858	65195039	10781.9
Elqui	0.307045	16895	496337	0.125256	50.8833	0.612125	0.122342	0.422124	0.321545	0.10465	0.0293398	0.804017	0.12315	0.648933	0.383983	84.4367	80.4417	46991519	154555484	3052.23
General Carrera	0.300571	11734	7531	0.104408	0.6	0.324974	0.117052	0.478148	0.248193	0.116531	0.0400756	0.8483	0.1164	0.5641	0.3819	65.585	89.245	3383106	6981132	2356.21
Huasco	0.296374	18202	74406	0.110227	4.15	0.60382	0.135489	0.412752	0.331521	0.0824783	0.0377595	0.770775	0.078125	0.60825	0.329075	79.82	80.0425	9991649	23205518	1685.83
Iquique	0.283261	2835	299843	0.142101	136.3	0.982232	0.124914	0.345293	0.361167	0.13129	0.0373363	0.88105	0.22005	0.7136	0.5054	85.305	74.595	22423731	89111353	482.53
Itata	0.278553	2745	53832	0.160506	20.7143	0.440669	0.109314	0.552018	0.23381	0.074141	0.0307173	0.5749	0.0457143	0.629671	0.248914	77.2829	86.1243	10333137	25927318	3791.63
Limarí	0.292545	13553	170579	0.136112	11.26	0.453899	0.129023	0.506568	0.265112	0.0638258	0.035472	0.72216	0.06032	0.64762	0.30016	79.958	83.916	17216972	44286966	1850.15
Linares	0.374374	10050	286361	0.148364	41.4	0.539441	0.119387	0.511373	0.26671	0.0707717	0.0317588	0.753138	0.0973375	0.651225	0.358525	84.91	76.7525	22641278	71817246	2051.99
Llanquihue	0.412384	10966	404029	0.129357	39.9125	0.642342	0.109922	0.498903	0.261634	0.0992466	0.0302952	0.7237	0.12115	0.674113	0.3807	80.075	87.525	33891691	100078984	2117.48
Los Andes	0.448485	2932	100395	0.108489	37.9333	0.746208	0.113281	0.374815	0.346072	0.123017	0.0428145	0.8697	0.1425	0.677867	0.430367	85.6333	74.1967	8027686	29284288	1145.93
Magallanes	0.426942	41978	133008	0.0879649	2.53333	0.318996	0.053919	0.312666	0.424176	0.193794	0.0154449	0.728333	0.123567	0.475	0.319233	63.2533	87.8133	13270415	57755261	14545.5
Maipo	0.430686	1047	470686	0.10076	840.833	0.827977	0.116949	0.395211	0.330486	0.120848	0.0365062	0.890967	0.165133	0.730133	0.472333	87.9467	56.8567	24972173	99681110	621.56
Malleco	0.469695	13433	205124	0.1943	20.0909	0.655896	0.134445	0.502175	0.255899	0.0708996	0.0365814	0.655182	0.0768364	0.616464	0.308018	77.6655	88.2827	27832867	66479556	4163.7
Marga Marga	0.488069	1160	341893	0.11059	458.225	0.88165	0.0995368	0.350566	0.34824	0.165133	0.0365244	0.87615	0.1671	0.6931	0.4631	82.7825	65.9725	20035789	83594443	891.57
Melipilla	0.378706	3221	167291	0.105813	46.275	0.450211	0.11491	0.445762	0.303968	0.0937324	0.0416282	0.7722	0.082775	0.645525	0.343275	81.3725	79.8975	14385577	63427746	1410.46
Osorno	0.38999	7626	222455	0.139712	36.6	0.493653	0.11109	0.519476	0.252627	0.0765501	0.0402571	0.613733	0.104033	0.66845	0.338817	85.16	83.8883	18248876	50133826	1951.88
Palena	0.393959	15303	18349	0.123799	1.6	0.516931	0.101496	0.51084	0.255418	0.114649	0.0175975	0.63365	0.1397	0.6167	0.37415	77.8875	87.5875	5804143	13029003	3379.25
Parinacota	0.255989	8147	3449	0.231659	0.4	0.38915	0.135408	0.373868	0.371207	0.0915072	0.0280091	0.38595	0.0435	0.52335	0.20215	62.855	86.485	2157151	6295236	3438.91
Petorca	0.466321	4589	46448	0.110812	22.74	0.663042	0.110014	0.438743	0.318126	0.0994481	0.0336678	0.85406	0.10942	0.65408	0.38694	81.128	64.22	14456154	43708189	4253.11
Punilla	0.244645	5203	106968	0.158558	24.32	0.376706	0.125256	0.516745	0.253828	0.0715507	0.0326207	0.72974	0.06382	0.65798	0.30858	76.88	87.988	10054136	29750991	2053.13
Quillota	0.473596	1113	203277	0.115731	311.38	0.841933	0.115561	0.405639	0.338899	0.115927	0.0239741	0.86992	0.14516	0.66756	0.43534	90.716	70.312	17706098	44192441	1070.17
Ranco	0.403675	8233	93969	0.138831	11.225	0.508672	0.120967	0.504982	0.254901	0.0765732	0.0425768	0.659575	0.092075	0.681425	0.341525	84.14	80.4275	10051680	27239878	1474.89
San Antonio	0.534142	1337	154229	0.130727	158.38	0.863207	0.101501	0.379824	0.342571	0.126197	0.0499076	0.81808	0.142	0.64526	0.41016	67.836	80.2	28063536	86931536	4025.93
San Felipe de Aconcagua	0.459193	2297	140720	0.119754	129.06	0.640748	0.115962	0.433654	0.323126	0.0958765	0.0313807	0.87022	0.10658	0.67144	0.39124	79.568	83.06	12092152	31653500	1364
Santiago	0.45705	1971	4976395	0.0976679	8543.79	0.998135	0.0991098	0.323647	0.3409	0.201092	0.0352514	0.929586	0.2668	0.723345	0.546755	86.171	72.3652	436426272	1893320815	9101.44
Talagante	0.429254	583	304029	0.100221	634.32	0.835945	0.116614	0.388547	0.34685	0.116479	0.0315096	0.8708	0.12832	0.68678	0.4223	88.052	89.094	21772133	59399382	897.1
Talca	0.347128	8984	404524	0.131466	145.233	0.588664	0.126981	0.489388	0.272725	0.0816803	0.0292256	0.7842	0.0887778	0.646344	0.344667	84.6244	81.3289	34582917	106078278	3804.78
Tamarugal	0.253285	39391	30715	0.193416	0.68	0.293919	0.123292	0.393104	0.318862	0.102625	0.062117	0.59832	0.05764	0.55624	0.26406	79.206	88.21	9413687	27500096	6555.97
Tierra del Fuego	0.32006	26996	8364	0.0725656	0.4	0.297113	0.0601484	0.355806	0.418217	0.14224	0.0235896	0.7303	0.144233	0.4094	0.305933	67.9433	86.5033	3417264	6697057	9907.57
Tocopilla	0.247826	16236	31643	0.13086	3.35	0.870351	0.0956973	0.341219	0.406786	0.118101	0.0381971	0.90085	0.11655	0.6305	0.40185	69.38	86.335	4402783	11481092	1020.58
Última Esperanza	0.367607	56554	22686	0.0670198	0.3	0.446524	0.0631192	0.305159	0.354999	0.251509	0.0252142	0.80205	0.13425	0.60095	0.3942	81.175	78.585	5030109	14676999	2912.35
Valdivia	0.350081	10198	290868	0.141488	35.3625	0.613136	0.115635	0.466217	0.294979	0.0831291	0.0400394	0.673075	0.11215	0.646513	0.361262	84.3162	75.8988	27442888	87529882	2724.33
Valparaíso	0.461585	1727	398523	0.113865	348.08	0.688927	0.101804	0.346393	0.34029	0.180762	0.0307508	0.87796	0.17074	0.71794	0.46476	77.682	83.254	32855505	135006022	4225.57
Total general	0.389759	727303	16341671	0.130601	886.306	0.639403	0.113563	0.444335	0.300209	0.109458	0.0324351	0.763367	0.12154	0.65071	0.377813	80.6125	80.3883	1468058523	5180321081	185119
