# Supplementary material for: Introducing the municipal digital offering index for evaluating online services and addressing the digital divide
Source: PeerJ Comput Sci. 2025 Sep 3;11:e3049. doi: 10.7717/peerj-cs.3049 (PMC12453795; doi:10.7717/peerj-cs.3049)
Supplement: Supplemental Information 5 [file peerj-cs-11-3049-s005.xlsx]

## Sheet: Datos
Dimensión	Factor 1: Información de unidades municipales y funcionarios												Factor 2: Integración										Factor 3: Transparencia										Factor 4: Información Educacional y de Salud												Factor 5: Ley de Lobby
Carga Factorial	0.532139	0.788368	0.925086	0.869291	0.886688	0.849908	0.491695	0.762181	0.773123	0.841544	0.793886	0.764094	0.4842	0.753696	0.667876	0.77331	0.647721	0.76821	0.809356	0.84603	0.796101	0.754256	0.805449	0.806873	0.817781	0.555975	0.675396	0.55149	0.54715	0.923799	0.727688	0.613066	0.572497	0.643455	0.758246	0.715025	0.797898	0.461758	0.458331	0.534096	0.690897	0.761444	0.800483	0.660497	0.93848	0.94236	0.919636	0.947645	0.876725
Comuna	Información de los Concejales	Institución Municipal	Dirección de desarrollo comunitario (DIDECO)	Obras Municipales	Secretaría Municipal	Secretaría Comunal de Planificación	Gabinete	Medio Ambiente Aseo y Ornato	Tránsito y Transporte Público	Desarrollo Comunitario	Administración Municipal	Asesoría Jurídica	Actividad para Adulto Mayor	Programas de Inclusión para Mujeres	Talleres de Inclusión para Mujeres	Programas de Inclusión para Discapacitados	Talleres de Inclusión para Discapacitados	Red de Apoyo para Mujeres	Red de Apoyo para Discapacitados	Atención Preferencial para Discapacitados	Inclusión Laboral para Discapacitados	Inclusión Laboral para Mujeres	Seguimientos de Solicitudes	Reclamos	Cuenta Pública	Fecha de la última actualización de la página	Presupuestos Asignados y su Ejecución	Estados Financieros	Participación en otras entidades	Información General Respecto la Ley:	Espacio para la Solicitud de Información	Permiso de Circulación	Programas Educativos para adultos	Noticias Educacionales	Dirección del Departamento de Educación Municipal	Listado de Centros Médicos	Líneas de Emergencias o Urgencias	Convenios de Salud	Centro de Especialidades de la Comuna	Programas de la Salud	Noticias de la Salud	Dirección del Departamento de Salud Municipal	Listado de Colegios Municipales	Programas Educativos para niños (extra programáticos)	Sujetos Pasivos	Sujetos Activos	Audiencias y Reuniones	Viajes	Donativos
Isla de Maipo	1	1	1	1	0	0	0	1	1	0	0	0	1	1	1	0	0	0	0	0	0	0	0	1	1	0	1	0	0	1	1	1	0	0	0	0	1	0	0	0	1	0	0	0	1	1	1	0	0
Algarrobo	0	1	1	1	1	1	0	1	1	1	1	1	1	0	1	1	1	0	1	0	1	0	1	1	1	1	1	1	1	1	1	1	0	1	1	1	1	0	1	0	1	1	0	0	1	1	1	1	1
Alhué	1	1	1	1	1	1	0	1	1	1	1	1	0	0	0	0	0	0	0	0	0	0	1	1	1	1	1	1	1	1	1	1	0	0	0	0	0	0	0	0	0	0	0	0	1	1	1	1	1
Alto Biobío	1	0	0	0	0	0	0	0	0	0	0	0	0	0	0	0	0	0	0	0	0	0	1	1	1	1	1	1	1	1	1	1	0	0	0	0	0	0	0	0	0	0	0	0	1	1	1	1	1
Alto Del Carmen	1	1	1	1	1	1	0	1	1	1	1	1	0	1	1	0	0	0	0	0	0	0	1	1	1	1	1	1	1	1	1	1	0	0	0	1	0	0	0	0	0	1	0	0	1	1	1	1	1
Alto Hospicio	0	0	0	0	0	0	0	0	0	0	0	0	0	0	0	0	0	0	0	0	0	0	0	0	0	0	0	0	0	0	0	0	0	0	0	0	0	0	0	0	0	0	0	0	0	0	0	0	0
Ancud	1	1	1	1	1	1	0	1	1	1	1	1	1	1	1	1	1	1	1	1	1	1	1	1	1	1	1	1	1	1	1	1	0	0	0	0	0	0	0	0	0	0	0	0	1	1	1	1	1
Andacollo	1	0	0	0	0	0	0	0	0	0	0	0	0	0	0	0	0	0	0	0	0	0	1	1	1	1	1	1	1	1	1	0	0	0	0	0	0	0	0	0	0	0	0	0	1	1	1	1	1
Angol	1	0	1	1	1	1	0	0	1	1	1	1	0	1	0	0	0	0	0	0	0	1	1	1	1	1	1	1	1	1	1	1	0	1	1	1	0	0	0	0	0	1	1	0	1	1	1	1	1
Antofagasta	1	1	1	1	1	1	1	1	1	1	1	1	1	1	1	1	1	1	1	1	1	1	1	1	1	1	1	1	1	1	1	1	1	1	0	0	0	0	0	0	0	0	0	1	1	1	1	1	1
Antuco	1	1	1	1	1	1	0	1	1	1	1	1	0	0	0	0	0	0	0	0	0	0	1	1	1	1	1	1	1	1	1	1	0	0	0	0	0	0	0	0	0	0	0	0	1	1	1	1	1
Arauco	1	1	1	1	1	1	0	1	1	1	1	1	0	0	0	0	0	0	0	0	0	0	1	1	1	1	1	1	1	1	1	1	0	0	0	0	0	0	0	0	0	0	0	0	1	1	1	1	1
Arica	1	0	1	1	1	1	1	1	1	1	1	1	0	0	0	0	0	0	0	0	0	0	1	1	1	0	0	1	0	1	1	1	0	1	0	0	0	0	0	0	1	0	0	0	1	1	1	1	1
Aysén	1	1	1	1	1	1	0	1	1	1	1	1	1	1	1	1	1	1	1	1	0	0	1	1	1	1	1	1	1	1	1	1	0	1	1	0	0	0	0	0	1	0	0	0	1	1	1	1	1
Buin	1	1	1	1	1	1	0	1	1	1	1	1	0	0	0	0	0	0	0	0	0	0	1	1	1	1	1	1	1	1	1	1	0	0	0	0	0	0	0	0	0	0	0	0	1	1	1	1	1
Bulnes	1	1	1	1	1	1	0	0	1	1	1	1	0	0	0	0	0	0	0	0	0	0	1	1	1	1	1	1	1	1	1	1	0	0	1	1	1	0	0	0	0	1	0	0	1	1	1	1	1
Cabildo	1	1	1	1	1	1	0	0	1	1	0	1	1	0	1	1	0	1	1	0	0	0	1	1	1	1	1	1	1	1	1	1	0	1	0	1	0	0	1	1	1	1	1	0	1	1	1	1	1
Cabo De Hornos	1	1	1	1	1	1	0	1	0	1	1	0	1	0	1	0	0	0	1	0	0	0	1	1	1	1	1	1	1	1	1	1	0	1	0	0	0	0	0	0	1	0	0	0	1	1	1	1	1
Cabrero	1	1	1	1	1	1	0	1	1	1	1	1	0	0	0	0	0	0	0	0	0	0	1	1	1	1	1	1	1	1	1	1	0	0	0	0	0	0	0	0	0	0	0	0	1	1	1	1	1
Calama	1	0	0	0	0	0	0	1	0	0	0	0	0	0	0	0	0	0	0	0	0	0	0	0	0	1	1	1	1	0	1	1	0	0	0	0	0	0	0	0	0	0	0	0	0	0	0	0	0
Calbuco	1	1	1	1	1	1	0	1	1	1	1	1	0	0	0	0	0	0	0	0	0	0	1	1	1	1	1	1	1	1	1	1	0	0	0	0	0	0	0	0	0	0	0	0	1	1	1	1	1
Caldera	1	0	0	0	0	0	0	0	0	0	0	0	0	0	0	0	0	0	0	0	0	0	1	1	1	1	1	1	1	1	1	1	0	0	0	0	0	0	0	0	0	0	0	0	0	0	1	0	0
Calera	1	1	1	1	0	0	0	1	1	1	0	1	1	0	1	0	0	0	0	0	0	0	1	1	1	1	1	1	1	1	1	1	0	1	0	0	0	0	0	0	1	0	0	0	1	1	1	1	1
Calera De Tango	0	0	0	0	0	0	0	0	0	0	0	0	0	0	0	0	0	0	0	0	0	0	0	0	0	0	0	0	0	0	0	0	0	0	0	0	1	0	0	0	0	0	0	0	0	0	0	0	0
Calle Larga	0	1	0	1	0	0	0	0	0	0	0	0	1	0	1	1	0	0	0	0	0	0	1	1	1	1	1	1	1	1	1	1	0	1	1	0	1	0	1	0	1	1	1	1	1	1	1	1	0
Camarones	1	0	0	0	1	0	0	0	0	0	0	0	1	0	0	0	0	0	0	0	0	0	1	1	1	1	1	1	1	1	1	1	0	1	0	1	1	0	0	0	1	0	0	0	1	1	1	1	1
Camiña	1	1	1	1	1	1	0	0	0	1	1	0	0	0	0	0	0	0	0	0	0	0	1	0	0	1	1	1	1	1	1	0	0	0	0	0	0	0	0	0	0	0	0	0	0	0	0	0	0
Canela	1	0	0	1	0	0	0	1	0	0	0	1	0	0	0	0	0	0	0	0	0	0	1	1	1	1	1	1	1	1	1	1	0	0	0	0	0	0	0	0	0	0	0	0	0	0	0	0	0
Cañete	1	1	1	1	1	1	0	1	1	1	1	1	0	0	0	0	0	0	0	0	0	0	1	1	1	1	1	1	1	1	1	1	0	1	1	1	1	0	0	0	1	1	1	1	1	1	1	1	1
Carahue	1	1	1	1	1	0	0	1	0	1	1	0	1	0	0	1	1	0	1	0	0	0	1	1	1	1	1	1	1	1	1	1	0	1	0	0	0	0	0	0	0	0	0	0	0	0	0	0	0
Cartagena	1	1	1	1	1	1	0	1	1	1	1	1	1	0	0	0	0	0	0	0	0	0	1	1	1	1	1	1	1	1	1	1	0	1	0	0	1	0	0	0	0	0	0	0	1	1	1	1	1
Casablanca	1	1	1	1	1	1	0	1	1	1	1	1	1	1	1	0	0	1	1	1	1	1	1	1	1	1	1	1	1	1	1	1	0	1	1	1	1	0	0	0	1	1	1	1	1	1	1	1	1
Castro	1	1	1	1	1	1	0	1	1	1	1	1	0	0	0	0	0	0	0	0	0	0	1	1	1	1	1	1	1	1	1	1	0	0	0	0	0	0	0	0	0	0	0	0	1	1	1	1	1
Catemu	1	1	1	1	1	1	1	1	1	1	1	1	0	0	0	0	0	0	0	0	0	0	1	1	1	1	1	1	1	1	1	1	0	0	1	0	0	0	0	0	0	1	0	0	1	1	1	1	1
Cauquenes	1	0	0	0	0	0	0	0	0	0	0	0	0	0	0	0	0	0	0	0	0	0	1	1	1	1	1	1	1	1	1	1	0	0	0	0	0	0	0	0	0	0	0	0	1	1	1	1	1
Cerrillos	1	1	1	1	1	1	1	1	1	1	1	1	0	0	0	0	0	0	0	0	0	0	1	1	1	1	1	1	1	1	1	1	0	0	0	0	0	0	0	0	0	0	0	0	1	1	1	1	1
Cerro Navia	1	1	1	1	1	1	0	1	1	1	1	1	0	0	0	0	0	0	0	0	0	0	1	1	1	1	1	1	1	1	1	1	0	0	0	0	0	0	0	0	0	0	0	0	1	1	1	1	1
Chaitén	1	0	0	0	0	0	0	0	0	0	0	0	0	0	0	0	0	0	0	0	0	0	1	1	1	1	1	1	1	1	1	1	0	0	0	0	0	0	0	0	0	0	0	0	1	1	1	1	1
Chanco	1	1	1	1	1	1	0	1	1	1	1	1	0	0	0	0	0	0	0	0	0	0	1	1	1	1	1	1	1	1	1	1	0	0	0	0	0	0	0	0	0	0	0	0	1	1	1	1	1
Chañaral	1	1	1	1	1	1	0	1	1	1	1	1	0	0	0	0	0	0	0	0	0	0	1	1	1	1	1	1	1	1	1	1	0	0	0	0	0	0	0	0	0	0	0	0	0	0	0	0	0
Chépica	1	1	1	1	1	1	0	1	1	1	1	0	0	0	0	0	0	0	0	0	0	0	1	1	1	1	1	1	1	1	1	1	1	1	1	0	1	0	0	0	0	0	1	1	1	1	1	1	1
Chiguayante	1	1	1	1	1	1	0	1	1	1	1	1	1	1	1	1	1	1	1	1	1	1	1	1	1	1	1	1	1	1	1	1	0	0	0	0	0	0	0	0	0	0	0	0	1	1	1	1	1
Chile Chico	1	0	0	0	0	0	0	0	0	0	0	0	0	0	0	0	0	0	0	0	0	0	1	1	1	1	1	1	1	1	1	1	0	0	0	0	0	0	0	0	0	0	0	0	1	1	1	1	1
Chillán	1	1	1	1	1	1	0	1	1	1	1	1	1	1	1	1	1	1	1	1	1	1	1	1	1	1	1	1	1	1	1	1	0	0	0	0	0	0	0	0	0	0	0	0	1	1	1	1	1
Chillán Viejo	1	0	0	0	0	0	0	0	0	0	0	0	0	0	0	0	0	0	0	0	0	0	1	1	1	1	1	1	1	1	1	0	0	0	0	0	0	0	0	0	0	0	0	0	0	0	0	0	0
Chimbarongo	1	1	1	1	1	1	0	1	1	1	1	1	1	1	1	0	0	1	0	0	0	1	1	1	1	1	1	1	1	1	1	1	0	0	0	0	0	0	0	0	0	1	0	0	1	1	1	1	1
Cholchol	1	0	1	0	1	1	0	0	1	1	1	1	1	1	0	0	0	0	0	0	0	1	1	1	1	1	1	1	1	1	1	1	0	1	0	0	0	0	0	0	1	0	0	0	1	1	1	1	1
Chonchi	1	1	1	1	1	1	0	1	1	1	1	1	0	0	0	0	0	0	0	0	0	0	1	1	1	1	1	1	1	1	1	1	0	0	0	0	0	0	0	0	0	0	0	0	1	1	1	1	1
Cisnes	1	1	0	0	0	0	0	0	0	0	0	0	0	0	0	0	1	0	1	0	0	0	1	1	1	1	1	1	1	1	1	1	0	1	0	0	0	0	0	0	0	0	0	0	1	1	1	1	1
Cobquecura	1	0	0	0	0	0	0	0	0	0	0	0	1	0	0	0	0	0	0	0	0	0	1	1	1	1	1	1	1	1	1	1	0	1	1	0	1	0	0	0	0	0	0	0	0	0	0	0	0
Cochamó	1	1	1	1	1	1	0	1	1	1	1	1	0	0	0	0	0	0	0	0	0	0	1	1	1	1	1	1	1	1	1	1	0	0	0	0	0	0	0	0	0	0	0	0	1	1	1	1	1
Cochrane	1	1	1	1	1	0	0	0	1	1	0	0	0	0	0	0	0	0	0	0	0	0	1	1	1	1	1	1	1	1	1	0	0	1	0	0	0	0	0	0	0	0	0	0	1	1	1	1	0
Codegua	1	1	1	1	1	1	0	1	1	1	1	1	0	0	0	0	0	0	0	0	0	0	1	1	1	1	1	1	1	1	1	1	0	0	0	0	1	0	0	0	0	0	0	0	1	1	1	1	1
Coelemu	1	0	0	0	0	0	0	0	0	0	0	0	0	0	0	0	0	0	0	0	0	0	1	1	1	1	1	1	1	1	1	1	0	0	0	0	0	0	0	0	0	0	0	0	0	0	0	0	0
Coihueco	1	0	0	0	0	0	0	0	0	0	0	0	0	0	0	0	0	0	0	0	0	0	1	1	1	1	1	1	1	1	1	1	0	0	0	0	0	0	0	0	0	0	0	0	0	0	0	0	0
Coinco	1	1	1	1	1	1	0	1	1	1	1	1	0	0	0	0	0	0	0	0	0	0	1	1	1	1	1	1	1	1	1	1	0	1	1	0	0	0	0	0	0	0	1	1	1	1	1	1	1
Colbún	1	1	1	1	1	1	1	1	1	1	1	1	0	0	0	0	0	0	0	0	0	0	1	1	1	1	1	1	1	1	1	1	0	0	0	1	1	0	0	0	0	0	1	0	1	1	1	1	1
Colchane	1	1	1	1	1	1	0	1	1	1	1	1	0	0	0	0	0	0	0	0	0	0	1	1	1	1	1	1	1	1	1	1	0	0	0	0	0	0	0	0	0	0	0	0	0	0	0	0	0
Colina	1	1	1	1	1	1	0	1	1	1	1	1	0	0	0	0	0	0	0	0	0	0	1	1	1	1	1	1	1	1	1	1	0	1	1	1	0	0	0	0	1	1	1	0	1	1	1	1	1
Collipulli	1	1	1	1	1	1	0	1	1	1	1	1	1	1	0	1	0	0	1	0	0	0	1	1	1	1	1	1	1	1	1	1	0	0	1	0	0	0	0	0	0	1	0	0	1	1	1	1	1
Coltauco	1	1	1	1	1	1	0	1	1	1	1	1	0	0	0	0	0	0	0	0	0	0	1	1	1	1	1	1	1	1	1	1	0	0	0	0	0	0	0	0	0	0	0	0	1	1	1	1	1
Combarbalá	1	0	0	0	0	0	0	0	0	0	0	0	0	0	0	0	0	0	0	0	0	0	1	1	1	1	1	1	1	1	1	1	0	0	0	0	0	0	0	0	0	0	0	0	1	1	1	1	1
Concepción	1	1	1	1	1	1	0	1	1	1	1	1	0	0	0	0	0	0	0	0	0	0	1	1	1	1	1	1	1	1	1	1	0	0	0	0	0	0	0	0	0	0	0	0	1	1	1	1	1
Conchalí	1	1	1	1	1	1	0	0	1	1	1	1	0	0	0	0	0	0	0	0	0	0	1	1	1	1	1	1	1	1	1	1	0	0	1	0	0	0	0	0	0	1	0	0	1	1	1	1	1
Concón	0	1	1	1	1	0	0	0	1	1	1	1	1	1	0	0	0	1	1	0	1	1	0	1	0	1	1	1	1	0	1	1	1	0	1	1	1	0	0	1	0	1	1	0	1	1	1	1	1
Constitución	0	0	0	0	0	0	0	0	0	0	0	0	0	0	0	0	0	0	0	0	0	0	1	1	1	1	1	1	1	1	1	1	0	0	0	0	0	0	0	0	0	0	0	0	1	1	1	1	1
Contulmo	1	1	1	0	1	1	0	0	1	0	0	1	0	0	0	0	0	0	0	0	0	0	1	1	1	1	1	1	1	1	1	1	0	0	0	0	0	0	0	0	0	0	0	0	1	1	1	1	1
Copiapó	0	0	0	0	0	0	0	0	0	0	0	0	1	0	0	0	0	0	0	0	0	0	1	1	1	1	1	1	1	1	1	0	0	0	0	0	0	0	0	0	0	0	0	0	1	1	1	1	1
Coquimbo	1	1	1	1	1	1	0	1	1	1	1	1	0	0	0	0	0	0	0	0	0	0	1	1	1	1	1	1	1	1	1	1	0	0	0	1	0	1	0	0	1	1	0	0	1	1	1	1	1
Coronel	1	1	1	1	1	1	0	1	1	1	1	1	0	0	0	0	0	0	0	0	0	0	1	1	1	1	1	1	1	1	1	1	0	0	0	0	0	0	0	0	0	0	0	0	1	1	1	1	1
Corral	1	1	1	1	1	1	0	0	0	0	0	0	0	0	0	0	0	0	0	0	0	0	0	0	0	0	0	0	0	0	0	0	0	1	1	0	0	0	0	0	1	1	0	0	1	1	1	1	1
Coyhaique	1	1	1	1	1	1	1	1	1	1	1	1	1	0	1	1	0	1	1	1	0	0	1	1	1	1	1	1	1	1	1	1	0	1	1	0	0	0	0	1	1	0	0	0	1	1	1	1	1
Cunco	1	1	1	1	1	1	1	1	1	1	1	1	1	1	0	1	0	1	1	1	0	1	1	1	1	1	1	1	1	1	1	1	0	0	1	0	0	0	0	0	0	0	1	0	1	1	1	1	0
Curacautín	1	1	1	1	1	1	0	1	1	1	1	1	1	1	1	1	1	0	0	0	0	1	1	1	0	1	1	1	1	1	1	1	0	1	1	0	0	0	0	1	1	1	0	0	1	1	1	1	0
Curacaví	1	1	1	1	1	1	0	1	1	1	1	1	0	0	0	0	0	0	0	0	0	0	1	1	1	1	1	1	1	1	1	1	0	0	0	0	0	0	0	0	0	0	0	0	1	1	1	1	1
Curaco De Vélez	0	1	0	1	1	1	0	0	0	0	1	0	1	0	0	0	0	0	0	0	0	0	1	1	1	1	1	1	1	1	1	1	0	0	0	0	0	0	0	0	0	0	0	0	1	1	1	1	1
Curanilahue	1	1	1	1	1	1	0	1	1	1	1	1	1	1	1	1	1	1	1	1	1	1	1	1	1	1	1	1	1	1	1	1	1	1	1	1	1	0	0	1	1	1	1	1	1	1	1	1	1
Curarrehue	1	1	1	1	1	1	1	0	0	1	1	0	0	0	0	0	0	0	0	0	0	1	1	1	1	1	1	1	1	1	1	1	0	0	1	0	0	0	0	0	0	1	1	0	1	1	1	1	1
Curepto	1	1	1	1	1	1	0	1	1	1	1	1	0	0	0	0	0	0	0	0	0	0	0	0	0	1	1	1	1	0	0	0	0	0	0	0	0	0	0	0	0	0	0	0	1	1	1	1	1
Curicó	1	1	1	1	1	1	0	1	1	1	1	1	0	0	0	0	0	0	0	0	0	0	1	1	1	1	1	1	1	1	1	1	1	1	1	0	0	0	0	0	0	0	1	1	1	1	1	1	1
Dalcahue	1	1	1	1	1	1	0	1	1	1	1	1	0	0	0	0	0	0	0	0	0	0	1	1	1	1	1	1	1	1	1	1	0	0	0	0	0	0	0	0	0	0	0	0	1	1	1	1	1
Diego De Almagro	1	1	1	1	1	1	0	1	1	1	1	1	0	1	1	0	0	0	0	0	0	0	1	1	1	1	1	1	1	1	1	1	0	0	0	0	1	0	0	0	0	1	0	0	1	1	1	1	1
Doñihue	1	1	1	1	1	1	0	1	1	1	1	1	0	0	0	0	0	0	0	0	0	0	1	1	1	1	1	1	1	1	1	1	0	0	0	0	0	0	0	0	0	0	0	0	1	1	1	1	1
El Bosque	1	1	1	1	1	1	1	1	1	1	1	1	0	0	0	0	0	0	0	0	0	0	1	1	1	1	1	1	1	1	1	1	0	1	1	0	0	0	0	0	1	1	1	0	1	1	1	1	1
El Carmen	1	0	0	0	0	0	0	0	0	0	0	0	1	0	0	0	0	0	0	0	0	0	1	1	1	1	1	1	1	1	1	1	0	0	0	0	0	0	0	0	0	0	0	0	1	1	1	1	1
El Monte	1	1	1	1	1	1	0	1	1	1	1	1	0	0	0	0	0	0	0	0	0	0	1	1	1	1	1	1	1	1	1	1	0	0	0	1	0	0	0	0	0	0	1	0	1	1	1	1	1
El Quisco	1	1	1	1	1	1	0	1	1	1	1	1	1	1	1	1	1	1	1	0	0	1	1	1	1	1	1	1	1	1	1	1	0	1	1	1	1	0	1	1	1	1	1	0	1	1	1	1	1
El Tabo	1	0	1	1	1	1	0	1	1	1	1	1	1	1	1	1	0	1	1	0	0	1	1	1	1	1	1	1	1	1	1	1	0	1	1	0	0	0	0	0	0	1	0	0	1	1	1	1	0
Empedrado	1	1	1	1	1	1	0	1	1	1	1	1	0	0	0	0	0	0	0	0	0	0	1	1	1	1	1	1	1	1	1	1	0	0	0	0	0	0	0	0	0	0	0	0	0	0	0	0	0
Ercilla	1	1	1	1	0	1	0	0	0	1	1	0	1	1	0	0	0	0	0	0	0	1	1	1	1	1	1	1	1	1	1	1	0	0	1	0	1	0	0	0	0	1	0	0	1	1	1	1	1
Estación Central	1	1	1	1	1	1	1	1	1	1	1	1	0	0	0	0	0	0	0	0	0	0	1	1	1	1	1	1	1	1	1	1	1	1	1	0	0	0	0	0	0	0	1	0	1	1	1	1	1
Florida	1	1	1	1	1	1	0	1	1	1	1	1	0	0	0	0	0	0	0	0	0	0	1	1	1	1	1	1	1	1	1	1	0	0	0	0	0	0	0	0	0	0	0	0	1	1	1	1	1
Freire	1	1	1	1	1	1	0	1	1	0	0	0	1	0	0	0	0	0	0	0	0	0	1	1	1	1	1	1	1	1	1	1	0	1	1	0	1	0	1	0	1	1	0	0	1	1	1	1	1
Freirina	0	0	0	0	0	0	0	0	0	0	0	0	0	0	0	0	0	0	0	0	0	0	1	1	1	1	1	1	1	1	1	1	0	0	0	0	0	0	0	0	0	0	0	0	1	1	1	1	1
Fresia	1	1	1	1	1	1	0	1	1	1	1	1	0	0	0	0	0	0	0	0	0	0	1	1	1	1	1	1	1	1	1	1	0	0	0	0	0	0	0	0	0	0	0	0	1	1	1	1	1
Frutillar	1	1	1	1	1	1	0	1	1	1	1	1	1	0	0	0	0	0	0	0	0	0	1	1	1	1	1	1	1	1	1	1	0	0	0	1	1	0	0	0	1	1	0	0	1	1	1	1	1
Futaleufú	1	1	1	1	1	1	0	1	1	1	1	1	1	1	1	1	1	1	1	1	1	1	1	1	1	1	1	1	1	1	1	1	0	1	1	1	1	0	0	0	1	1	1	1	1	1	1	1	1
Futrono	1	1	1	1	1	1	0	1	1	1	1	0	0	0	0	0	0	0	0	0	0	0	1	1	1	1	1	1	1	1	1	1	0	0	0	0	0	0	0	0	0	0	0	0	1	1	1	1	1
Galvarino	1	1	0	1	1	1	0	1	1	0	1	0	1	1	1	0	0	0	0	0	0	1	1	1	1	1	1	1	1	1	1	1	0	1	0	0	0	0	0	0	0	0	0	0	1	1	1	1	1
General Lagos	1	0	0	0	0	0	0	0	0	0	0	0	0	0	0	0	0	0	0	0	0	0	0	0	1	1	1	1	1	0	0	0	0	0	0	0	0	0	0	0	0	0	0	0	1	1	1	1	1
Gorbea	1	1	1	1	0	1	0	1	1	1	0	0	1	1	1	1	0	1	1	0	0	1	1	1	1	1	1	1	1	1	1	1	0	1	1	1	1	0	0	1	1	1	1	0	1	1	1	1	1
Graneros	1	1	1	1	1	1	0	1	1	1	1	1	0	0	0	0	0	0	0	0	0	0	1	1	1	1	1	1	1	1	1	1	0	0	0	0	0	0	0	0	0	0	0	0	1	1	1	1	1
Guaitecas	1	1	1	0	1	1	0	1	0	1	1	1	1	1	1	1	1	0	0	0	0	0	1	1	1	1	1	1	1	1	1	1	0	1	1	0	0	0	0	0	1	0	0	0	1	1	0	1	1
Hijuelas	1	1	1	1	1	1	1	0	1	1	1	1	0	1	0	0	0	0	0	0	0	1	1	1	1	1	1	1	1	1	1	0	0	1	1	1	1	0	1	1	1	1	1	0	1	1	1	1	1
Hualaihué	1	1	1	1	1	1	0	1	0	1	1	1	0	0	0	0	0	0	0	0	0	0	1	1	1	1	1	1	1	1	1	1	0	0	0	0	0	0	0	0	0	0	0	0	1	1	1	1	1
Hualañé	1	1	1	1	1	1	0	1	1	1	1	1	0	0	0	0	0	0	0	0	0	0	1	1	1	1	1	1	1	1	1	1	0	0	0	0	0	0	0	0	0	0	0	0	1	1	1	1	1
Hualpén	0	1	1	1	1	1	0	1	1	1	1	1	0	0	0	0	0	0	0	0	0	0	1	1	1	1	1	1	1	1	1	1	1	1	1	1	1	0	1	1	1	1	1	1	1	1	1	1	1
Hualqui	1	1	1	1	1	1	0	1	1	1	1	1	0	1	1	1	1	1	1	1	1	1	1	1	1	1	1	1	1	1	1	1	0	0	0	0	0	0	0	0	0	0	0	0	1	1	1	1	1
Huara	1	0	0	0	0	0	0	0	0	0	0	0	0	0	0	0	0	0	0	0	0	0	1	1	1	1	1	1	1	1	1	1	0	0	0	0	0	0	0	0	0	0	0	0	0	0	0	0	0
Huasco	1	0	0	0	0	0	0	0	0	0	0	0	0	1	1	0	0	0	0	0	0	0	1	1	1	1	1	1	1	1	1	1	0	0	0	0	0	0	0	0	0	0	0	0	1	1	1	1	1
Huechuraba	1	1	1	1	1	1	0	1	1	1	1	1	0	0	0	0	0	0	0	0	0	0	1	1	1	1	1	1	1	1	1	1	1	1	1	1	1	0	0	1	1	1	1	1	1	1	1	1	1
Illapel	1	0	0	0	0	0	0	0	0	0	0	0	0	0	0	0	0	0	0	0	0	0	1	1	1	1	1	1	1	1	1	1	0	0	0	0	0	0	0	0	0	0	0	0	1	1	1	1	1
Independencia	1	1	1	1	1	1	0	1	1	1	1	1	0	0	0	0	0	0	0	0	0	0	1	1	1	1	1	1	1	1	1	1	1	1	1	0	1	0	0	0	1	1	1	1	1	1	1	1	1
Iquique	1	1	1	1	1	1	0	1	1	1	1	1	0	1	0	1	0	1	1	1	1	1	1	1	0	1	0	0	1	1	1	1	0	0	0	0	0	1	1	0	1	1	0	0	1	1	1	1	1
Juan Fernández	1	1	1	1	1	1	1	0	0	1	0	0	0	0	1	0	0	0	0	0	0	0	1	1	1	0	1	0	0	1	1	0	0	1	0	0	1	1	1	1	1	0	1	0	1	1	1	1	0
La Cisterna	1	1	1	1	1	1	0	1	1	1	1	1	1	1	1	1	1	1	1	1	1	1	1	1	1	1	1	1	1	1	1	1	1	1	1	1	1	0	0	0	1	1	1	1	1	1	1	1	1
La Cruz	1	1	1	1	0	0	0	1	1	1	1	0	1	1	0	0	0	0	0	0	0	1	1	1	1	1	1	1	1	1	1	0	1	1	1	1	1	1	0	0	1	1	1	0	1	1	1	1	1
La Estrella	1	1	1	1	1	1	0	1	1	1	1	1	0	0	0	0	0	0	0	0	0	0	1	1	1	1	1	1	1	1	1	1	0	0	0	0	0	0	0	0	0	0	0	0	1	1	1	1	1
La Florida	1	1	1	1	1	1	0	1	1	1	1	1	1	1	1	1	1	1	1	1	1	1	1	1	1	1	1	1	1	1	1	1	0	0	0	0	0	0	0	0	0	0	0	0	1	1	1	1	1
La Granja	1	1	1	1	1	1	0	1	1	1	1	1	0	0	0	0	0	0	0	0	0	0	1	1	1	1	1	1	1	1	1	1	0	0	0	1	1	0	0	0	1	1	0	0	1	1	1	1	1
La Higuera	0	0	0	0	0	0	0	0	0	0	0	0	0	0	0	0	0	0	0	0	0	0	1	1	1	1	1	1	1	1	1	1	0	0	0	0	1	0	0	0	0	0	0	0	1	1	1	1	1
La Ligua	1	1	1	1	1	1	0	1	1	1	1	1	1	1	1	0	1	0	0	0	0	0	1	1	1	1	1	1	1	1	1	1	0	1	0	0	0	0	1	0	1	0	1	0	1	1	1	1	1
La Pintana	1	1	1	1	1	1	1	1	1	1	1	1	1	0	0	0	0	0	0	0	0	0	1	1	1	1	1	1	1	1	1	1	0	0	0	1	0	0	0	0	1	1	1	1	1	1	1	1	1
La Reina	1	1	1	1	1	1	0	1	1	1	1	1	1	1	1	0	0	1	0	0	0	1	1	1	1	1	1	1	1	1	1	1	0	0	0	0	0	0	0	0	0	0	0	0	1	1	1	1	1
La Serena	0	1	1	1	1	1	0	1	1	1	1	1	0	0	0	0	0	0	0	0	0	0	1	1	1	1	1	1	1	1	1	1	0	0	0	0	0	0	0	0	0	0	0	0	1	1	1	1	1
La Unión	1	1	1	1	1	1	0	1	1	1	1	1	1	0	0	0	0	0	0	0	0	0	1	1	1	1	1	1	1	1	1	1	0	1	1	1	1	0	0	0	1	1	1	1	1	1	1	1	1
Lago Ranco	1	1	1	1	1	1	0	1	1	1	1	1	0	0	0	0	0	0	0	0	0	0	1	1	1	1	1	1	1	1	1	1	0	0	0	0	0	0	0	0	0	0	0	0	1	1	1	1	1
Lago Verde	1	1	1	1	1	1	1	1	0	1	1	0	0	0	0	0	0	0	0	0	0	0	1	1	0	0	1	1	1	0	1	1	0	1	1	0	0	0	0	0	0	0	1	1	1	0	0	1	0
Laguna Blanca	1	1	1	0	1	1	0	0	0	1	1	0	0	0	0	0	0	0	0	0	0	0	1	1	1	1	1	1	1	1	1	1	0	1	1	0	0	0	0	0	0	1	0	0	1	1	0	1	0
Laja	0	1	1	1	1	1	0	1	1	1	1	1	0	0	0	0	0	0	0	0	0	0	1	1	1	1	1	1	1	1	1	1	0	1	1	0	0	0	0	0	0	0	1	1	1	1	1	1	1
Lampa	1	0	0	0	0	0	0	0	0	0	0	0	0	0	0	0	0	0	0	0	0	0	1	1	1	1	1	1	1	1	1	1	0	0	0	0	0	0	0	0	0	0	0	0	1	1	1	1	1
Lanco	1	0	0	0	0	0	0	0	0	0	0	0	0	0	0	0	0	0	0	0	0	0	1	1	1	1	1	1	1	1	1	1	0	0	0	0	0	0	0	0	0	0	0	0	1	1	1	1	1
Las Cabras	1	1	1	1	1	1	0	1	1	1	1	1	0	0	0	0	0	0	0	0	0	0	1	1	1	1	1	1	1	1	1	1	0	0	0	0	0	0	0	0	0	0	0	0	0	0	0	0	0
Las Condes	1	1	1	1	1	1	0	1	1	1	1	1	1	1	1	1	1	1	1	1	1	1	1	1	1	1	1	1	1	1	1	1	1	1	1	1	1	0	1	1	1	1	1	1	1	1	1	1	1
Lautaro	1	1	1	1	1	1	0	1	1	1	1	1	0	0	1	0	0	0	0	0	0	0	1	1	1	1	1	1	1	1	1	1	0	1	1	0	0	0	0	0	1	1	1	0	1	1	1	1	1
Lebu	1	1	1	1	1	1	0	1	1	1	1	1	0	0	0	0	0	0	0	0	0	0	1	1	1	1	1	1	1	1	1	1	0	0	0	0	0	0	0	0	0	0	0	0	1	1	1	1	1
Licantén	1	1	1	1	1	1	0	1	1	1	1	1	0	0	0	0	0	0	0	0	0	0	1	1	1	1	1	1	1	1	1	1	1	1	1	1	1	1	1	1	1	1	1	1	1	1	1	1	1
Limache	1	1	1	0	1	1	0	1	1	1	0	1	1	1	1	1	0	1	1	0	0	1	1	1	1	1	1	1	1	1	1	1	0	1	0	0	1	0	1	1	1	1	0	0	1	1	1	1	1
Linares	1	1	1	1	1	1	0	1	1	1	1	1	0	0	0	0	0	0	0	0	0	0	1	1	1	1	1	1	1	1	1	1	0	0	0	1	1	0	0	1	1	1	1	0	1	1	1	1	1
Litueche	1	1	1	1	1	1	0	1	1	1	1	1	0	0	0	0	0	0	0	0	0	0	1	1	1	1	1	1	1	1	1	1	0	1	1	1	0	0	0	0	1	1	1	1	1	1	1	1	1
Llaillay	1	1	0	0	0	0	0	1	0	0	0	0	0	0	0	0	0	0	0	0	0	1	1	1	1	1	1	1	1	1	1	1	0	0	0	0	1	0	0	0	1	0	1	0	1	1	1	1	0
Llanquihue	1	1	1	1	1	1	0	1	1	1	1	1	0	0	0	0	0	0	0	0	0	0	1	1	1	1	1	1	1	1	1	1	0	0	0	0	0	0	0	0	0	0	0	0	1	1	1	1	1
Lo Barnechea	1	1	1	1	1	1	1	1	1	1	1	1	1	1	1	1	1	1	1	1	1	1	1	1	1	1	1	1	1	1	1	1	1	1	1	1	1	0	1	1	1	1	1	1	1	1	1	1	1
Lo Espejo	1	1	1	1	1	1	0	1	1	1	1	1	0	0	0	0	0	0	0	0	0	0	1	1	1	1	1	1	1	1	1	1	0	0	1	1	0	0	0	0	1	1	1	0	1	1	1	1	1
Lo Prado	1	1	1	1	1	1	0	1	1	1	1	1	0	0	0	0	0	0	0	0	0	0	1	1	1	1	1	1	1	1	1	1	0	0	0	0	0	0	0	0	0	0	0	0	1	1	1	1	1
Lolol	1	1	1	1	1	1	0	1	1	1	1	1	0	0	0	0	0	0	0	0	0	0	1	1	1	1	1	1	1	1	1	1	1	1	1	0	1	0	0	1	1	1	0	1	1	1	1	1	1
Loncoche	1	1	1	1	1	1	0	1	1	1	1	0	1	1	1	0	0	1	0	0	0	1	1	1	1	1	1	1	1	1	1	1	1	1	0	0	0	0	0	0	1	0	1	1	1	1	1	1	0
Longaví	0	0	0	0	0	0	0	0	0	0	0	0	0	0	0	0	0	0	0	0	0	0	1	1	1	1	1	1	1	1	1	1	0	1	0	0	0	0	0	0	1	0	0	0	0	0	0	0	0
Lonquimay	0	1	1	1	1	1	1	0	1	1	1	1	1	1	1	1	0	0	0	0	0	1	1	1	1	1	1	1	1	1	1	1	0	1	1	0	0	0	1	0	0	1	1	0	1	1	1	1	1
Los Álamos	1	1	1	1	1	1	0	1	1	1	1	1	0	0	0	0	0	0	0	0	0	0	1	1	1	1	1	1	1	1	1	1	0	0	0	0	0	0	0	0	0	0	0	0	1	1	1	1	1
Los Andes	1	1	1	1	1	1	0	1	1	1	1	1	0	1	0	0	1	0	0	0	0	0	1	1	1	1	1	1	1	1	1	1	1	1	1	1	1	0	1	1	1	1	1	0	1	1	1	1	1
Los Ángeles	1	1	1	1	1	1	0	1	1	1	1	1	0	1	1	0	0	1	0	0	0	1	1	1	1	1	1	1	1	1	1	1	0	0	0	0	0	0	0	0	0	0	0	0	1	1	1	1	1
Los Lagos	1	1	1	1	1	1	0	1	1	1	1	1	0	0	0	0	0	0	0	0	0	0	1	1	1	1	1	1	1	1	1	1	0	0	0	0	0	0	0	0	0	0	0	0	1	1	1	1	1
Los Muermos	1	1	1	1	1	1	0	1	1	1	1	1	0	0	0	0	0	0	0	0	0	0	1	1	1	1	1	1	1	1	1	1	0	1	1	1	1	0	0	0	1	1	1	1	1	1	1	1	1
Los Sauces	1	1	1	1	1	1	1	0	1	1	1	0	1	1	1	0	0	0	1	0	0	1	1	1	1	1	1	1	1	1	1	1	0	1	1	0	0	0	0	0	1	1	0	0	1	1	1	1	1
Los Vilos	0	0	0	0	0	0	0	0	0	0	0	0	0	0	0	0	0	0	0	0	0	0	1	1	1	1	1	1	1	1	1	1	0	0	0	0	0	0	0	0	0	0	0	0	1	1	1	1	1
Lota	1	1	1	1	1	1	0	1	1	1	1	1	0	0	0	0	0	0	0	0	0	0	1	1	1	1	1	1	1	1	1	1	0	0	0	0	0	0	0	0	0	0	0	0	1	1	1	1	1
Lumaco	1	1	1	1	1	1	0	1	0	1	1	0	1	1	0	1	1	1	0	0	0	1	1	1	1	1	1	1	1	1	1	1	0	1	1	0	0	0	0	0	1	1	0	0	1	0	0	1	1
Machalí	1	1	1	1	1	1	0	1	1	1	1	1	0	1	1	1	1	1	1	1	1	1	1	1	1	1	1	1	1	1	1	1	0	1	1	1	1	0	0	0	1	1	1	1	0	0	0	0	0
Macul	1	1	1	1	1	1	0	1	1	1	1	1	0	0	0	0	0	0	0	0	0	0	1	1	1	1	1	1	1	1	1	1	0	0	0	0	0	0	0	0	0	0	0	0	1	1	1	1	1
Máfil	1	0	0	0	0	0	0	0	0	0	0	0	0	0	0	0	0	0	0	0	0	0	1	1	1	1	1	1	1	1	1	1	0	0	0	0	0	0	0	0	0	0	0	0	1	1	1	1	1
Maipú	1	1	1	1	1	1	0	1	1	1	1	1	1	1	1	0	0	1	0	0	0	1	1	1	1	1	1	1	1	1	1	1	0	0	0	0	0	0	0	0	0	0	0	0	1	1	1	1	1
Malloa	1	1	1	1	1	1	0	1	1	1	1	1	0	0	0	0	0	0	0	0	0	0	1	1	1	1	1	1	1	1	1	1	0	1	1	1	1	0	0	0	1	1	1	1	1	1	1	1	1
Marchihue	1	1	1	1	1	1	0	1	1	1	1	1	0	0	0	0	0	0	0	0	0	0	1	1	1	1	1	1	1	1	1	1	0	0	0	0	0	0	0	0	0	0	0	0	1	1	1	1	1
María Elena	1	0	0	0	0	0	0	0	0	0	0	0	0	0	0	0	0	0	0	0	0	0	0	0	0	0	0	0	0	0	0	1	0	0	0	0	0	0	0	0	1	0	0	0	1	1	1	1	1
María Pinto	1	0	0	0	0	0	0	0	0	0	0	0	0	0	0	0	0	0	0	0	0	0	1	1	1	1	1	1	1	1	1	1	0	0	0	0	0	0	0	0	0	0	0	0	1	1	1	1	1
Mariquina	1	1	1	1	1	1	1	1	1	1	1	1	0	0	0	0	0	0	0	0	0	0	1	1	1	1	1	1	1	1	1	1	0	0	0	1	0	0	0	0	1	1	0	0	0	0	0	0	0
Maule	1	1	1	1	1	1	0	1	1	1	1	1	0	0	0	0	0	0	0	0	0	0	1	1	1	1	1	1	1	1	1	0	0	0	0	0	0	0	0	0	0	0	0	0	1	1	1	1	1
Maullín	1	1	1	1	1	1	0	1	1	1	1	1	0	0	0	0	0	0	0	0	0	0	1	1	1	1	1	1	1	1	1	1	0	0	0	0	0	0	0	0	0	0	0	0	1	1	1	1	1
Mejillones	1	1	1	1	1	1	0	1	1	1	1	1	1	0	0	0	0	0	0	0	0	0	1	1	1	1	1	1	1	1	1	1	0	0	0	0	0	0	0	0	0	0	0	0	0	0	0	0	0
Melipeuco	1	1	0	1	0	0	0	1	0	1	0	0	1	1	1	0	1	1	0	0	0	1	1	1	1	1	1	1	1	1	1	1	0	1	0	0	0	0	0	0	1	0	0	0	1	1	1	1	1
Melipilla	1	1	1	1	1	1	0	1	1	1	1	1	0	0	0	0	0	0	0	0	0	0	1	1	1	1	1	1	1	1	1	1	0	0	0	0	0	0	0	0	0	0	0	0	1	1	1	1	1
Molina	1	1	1	1	1	1	0	1	1	1	1	1	0	0	0	0	0	0	0	0	0	0	1	1	1	1	1	1	1	1	1	1	0	0	0	0	0	0	0	0	0	0	0	0	1	1	1	1	1
Monte Patria	1	0	0	0	0	0	0	0	0	0	0	0	0	0	0	0	0	0	0	0	0	0	1	1	1	1	1	1	1	1	1	1	0	0	0	0	0	0	0	0	0	0	0	0	1	1	1	1	1
Mostazal	1	1	1	1	1	1	0	1	1	1	1	1	1	1	1	1	1	1	1	1	1	1	1	1	1	1	1	1	1	1	1	1	0	1	1	1	1	0	0	0	1	1	1	0	1	1	1	1	1
Mulchén	1	1	1	1	1	1	0	1	1	1	1	1	0	0	0	0	0	0	0	0	0	0	1	1	1	1	1	1	1	1	1	1	0	0	0	0	0	0	0	0	0	0	0	0	1	1	1	1	1
Nacimiento	1	1	1	1	1	1	0	1	1	1	1	1	0	0	0	0	0	0	0	0	0	0	1	1	1	1	1	1	1	1	1	1	0	0	0	0	0	0	0	0	0	0	0	0	1	1	1	1	1
Nancagua	1	1	1	1	1	1	0	0	1	1	1	1	1	1	1	1	1	1	1	1	1	1	1	1	1	1	1	1	1	1	1	1	0	0	0	0	0	0	0	0	0	0	0	0	1	1	1	1	1
Natales	1	1	1	1	1	1	0	1	1	1	1	1	1	0	0	0	0	0	0	0	0	0	1	1	1	1	1	1	1	1	1	1	0	0	0	0	0	0	0	0	0	0	0	0	1	1	1	1	1
Navidad	1	1	1	1	1	1	0	1	1	1	1	1	0	0	0	0	0	0	0	0	0	0	1	1	1	1	1	1	1	1	1	1	0	0	0	0	0	0	0	0	0	0	0	0	1	1	1	1	1
Negrete	1	1	1	1	1	1	0	1	1	1	1	1	0	0	0	0	0	0	0	0	0	0	1	1	1	1	1	1	1	1	1	1	0	0	0	0	0	0	0	0	0	0	0	0	1	1	1	1	1
Ninhue	0	0	0	0	0	0	0	0	0	0	0	0	0	0	0	0	0	0	0	0	0	0	1	1	1	1	1	1	1	1	1	1	0	0	0	0	0	0	0	0	0	0	0	0	0	0	0	0	0
Nogales	1	1	1	0	0	0	0	0	1	1	0	0	0	0	0	0	0	0	0	0	0	0	1	1	1	1	1	1	1	1	1	1	0	1	1	0	0	0	0	0	0	0	1	0	1	1	1	1	1
Nueva Imperial	1	1	1	1	1	1	0	0	1	1	1	0	1	1	1	1	0	0	1	0	0	1	1	1	1	1	1	1	1	1	1	1	0	1	0	1	0	0	0	0	1	1	0	0	1	1	1	1	1
Ñiquén	1	0	0	0	0	0	0	0	0	0	0	0	0	0	0	0	0	0	0	0	0	0	0	0	0	1	1	1	1	0	0	1	0	0	0	0	0	0	0	0	0	0	0	0	0	0	0	0	0
Ñuñoa	1	1	1	1	1	1	0	1	1	1	1	1	0	0	0	0	0	0	0	0	0	0	1	1	1	1	1	1	1	1	1	1	0	0	0	0	0	0	0	0	0	0	0	0	0	0	0	0	0
O'Higgins	1	1	1	0	1	1	0	0	0	1	1	0	0	0	0	0	0	0	0	0	0	0	1	1	0	1	1	1	1	1	1	1	0	0	0	1	1	0	1	1	1	0	1	0	1	1	1	1	1
Olivar	1	1	1	1	1	1	0	1	1	1	1	1	0	0	0	0	0	0	0	0	0	0	1	1	1	1	1	1	1	1	1	1	0	0	0	0	0	0	0	0	0	0	0	0	1	1	1	1	1
Ollagüe	1	0	0	0	0	0	0	0	0	0	0	0	0	0	0	0	0	0	0	0	0	0	0	0	0	0	0	0	0	0	0	0	0	0	0	0	0	0	0	0	0	0	0	0	0	0	0	0	0
Olmué	1	1	1	1	1	1	0	0	1	1	0	1	1	1	0	1	0	1	1	1	0	1	1	1	1	1	1	1	1	1	1	1	0	0	1	0	1	0	1	1	1	1	1	1	1	1	1	1	1
Osorno	1	1	1	1	1	1	1	1	1	1	1	1	0	0	0	0	0	0	0	0	0	0	1	1	1	1	1	1	1	1	1	1	0	0	0	0	1	0	0	0	0	0	0	0	1	1	1	1	1
Ovalle	1	1	1	1	1	1	0	1	1	1	1	1	0	0	0	0	0	0	0	0	0	0	1	1	1	1	1	1	1	1	1	1	0	0	0	0	0	0	0	0	0	0	0	0	1	1	1	1	1
Padre Hurtado	1	0	1	1	1	1	0	1	1	1	1	1	1	1	1	0	0	0	0	0	0	0	0	1	0	1	1	1	1	0	1	1	0	1	0	0	0	0	0	0	1	0	0	0	1	1	1	1	1
Padre Las Casas	1	1	1	1	1	1	0	1	1	1	1	1	1	1	0	1	0	1	1	1	0	1	1	1	1	1	1	1	1	1	1	1	0	0	1	1	1	0	0	0	0	1	1	0	1	1	1	1	1
Paiguano	0	0	0	0	0	0	0	0	0	0	0	0	0	0	0	0	0	0	0	0	0	0	1	1	1	1	1	1	1	1	1	1	0	0	0	0	0	0	0	0	0	0	0	0	1	1	1	1	1
Paillaco	1	1	1	1	1	1	0	1	1	1	1	1	0	0	0	0	0	0	0	0	0	0	1	1	1	1	1	1	1	1	1	1	0	0	0	1	1	0	0	0	1	1	0	0	1	1	1	1	1
Paine	1	1	1	1	1	1	0	1	1	1	1	1	1	0	0	0	0	0	0	0	0	0	1	1	1	1	1	1	1	1	1	1	0	1	1	0	1	0	0	0	1	1	1	0	1	1	1	1	1
Palena	1	1	1	1	1	1	0	1	1	1	1	1	0	0	0	0	0	0	0	0	0	0	1	1	1	1	1	1	1	1	1	1	0	0	0	0	0	0	0	0	0	0	0	0	1	1	1	1	1
Palmilla	1	1	1	1	1	1	0	1	1	1	1	1	0	0	0	0	0	0	0	0	0	0	1	1	1	1	1	1	1	1	1	0	0	0	0	0	0	0	0	0	0	0	0	0	1	1	1	1	1
Panguipulli	0	1	1	1	1	1	0	1	1	1	1	1	0	0	0	0	0	0	0	0	0	0	1	1	1	1	1	1	1	1	1	1	0	0	0	0	0	0	0	0	0	0	0	0	1	1	1	1	1
Panquehue	1	1	1	1	1	1	0	0	1	1	1	0	1	1	1	1	1	0	0	0	0	0	1	1	1	1	1	1	1	1	1	1	0	1	1	0	0	0	1	1	1	1	0	0	1	1	1	1	1
Papudo	1	1	1	1	1	0	0	0	0	1	1	1	1	1	0	1	0	1	1	0	0	0	1	1	1	1	1	1	1	1	1	1	0	1	1	1	1	1	1	1	1	1	1	0	1	1	1	1	0
Paredones	1	1	1	1	1	1	0	1	1	1	1	1	0	0	0	0	0	0	0	0	0	0	1	1	1	1	1	1	1	1	1	1	0	1	0	1	0	0	0	0	0	0	1	0	1	1	1	1	1
Parral	1	0	0	0	0	0	0	0	0	0	0	0	0	1	1	0	0	1	0	0	0	0	1	1	1	1	1	1	1	1	1	1	0	0	0	0	0	0	0	0	0	0	0	0	1	1	1	1	1
Pedro Aguirre Cerda	1	1	1	1	1	1	0	1	1	1	1	1	0	0	0	0	0	0	0	0	0	0	1	1	1	1	1	1	1	1	1	1	1	1	1	1	1	0	0	0	1	1	1	1	1	1	1	1	1
Pelarco	1	1	1	1	1	1	0	1	1	1	1	1	0	0	0	0	0	0	0	0	0	0	1	1	1	1	1	1	1	1	1	1	0	0	0	0	0	0	0	0	0	0	0	0	1	1	1	1	1
Pelluhue	1	1	1	1	1	1	0	1	1	1	1	1	0	0	0	0	0	0	0	0	0	0	1	1	1	1	1	1	1	1	1	1	0	0	0	0	0	0	0	0	0	0	0	0	1	1	1	1	1
Pemuco	1	0	0	0	0	0	0	0	0	0	0	0	1	0	0	0	0	0	0	0	0	0	1	1	1	1	1	1	1	1	1	1	0	0	0	0	0	0	0	0	0	0	0	0	1	1	1	1	1
Pencahue	1	1	1	1	1	1	0	1	1	1	1	1	0	0	0	0	0	0	0	0	0	0	1	1	1	1	1	1	1	1	1	1	0	0	0	0	0	0	0	0	0	0	0	0	0	0	0	0	0
Penco	1	1	1	1	1	1	0	1	1	1	1	1	0	0	0	0	0	0	0	0	0	0	1	1	1	1	1	1	1	1	1	1	0	0	0	0	0	0	0	0	0	0	0	0	1	1	1	1	1
Peñaflor	1	1	1	1	1	1	1	1	1	1	1	1	1	1	1	1	1	0	0	0	0	0	1	1	1	0	1	1	1	1	1	1	1	1	1	1	1	1	1	1	1	1	1	1	1	1	1	1	1
Peñalolén	1	1	1	1	1	1	0	1	1	1	1	1	0	1	1	1	1	1	1	1	1	1	1	1	1	1	1	1	1	1	1	1	1	1	1	1	1	0	0	0	1	1	1	1	1	1	1	1	1
Peralillo	1	1	1	1	1	1	0	1	1	1	1	1	0	0	0	0	0	0	0	0	0	0	1	1	1	1	1	1	1	1	1	1	0	0	0	0	0	0	0	0	0	0	0	0	0	0	0	0	0
Perquenco	1	1	1	1	0	1	0	0	0	1	1	1	1	1	1	0	0	0	0	0	0	1	1	1	1	1	1	1	1	1	1	1	0	1	1	0	0	0	0	0	1	1	0	0	1	1	1	1	0
Petorca	1	1	0	0	0	0	0	0	0	0	0	0	1	1	0	1	0	1	1	0	0	1	1	1	1	1	1	1	1	1	1	1	0	0	0	0	0	0	0	0	0	1	0	0	1	1	1	1	1
Peumo	1	1	1	1	1	1	0	1	1	1	1	1	0	0	0	0	0	0	0	0	0	0	1	1	1	1	1	1	1	1	1	1	0	0	0	0	0	0	0	0	0	0	0	0	0	0	0	0	0
Pica	1	1	1	1	1	1	0	1	1	1	1	1	1	0	0	0	0	0	0	0	0	0	1	1	1	1	1	1	1	1	1	0	0	0	0	1	0	0	0	0	0	0	0	0	1	1	1	1	1
Pichidegua	1	1	1	1	1	1	0	1	1	1	1	1	0	0	0	0	0	0	0	0	0	0	1	1	1	1	1	1	1	1	1	1	0	0	0	1	0	0	0	0	0	0	1	0	0	0	0	0	0
Pichilemu	1	1	1	1	1	1	0	1	1	1	1	1	0	0	0	0	0	0	0	0	0	0	1	1	1	1	1	1	1	1	1	1	0	0	0	0	0	0	0	0	0	0	0	0	1	1	1	1	1
Pinto	1	1	1	1	1	1	1	1	1	1	1	1	0	0	0	0	0	0	0	0	0	0	1	1	1	1	1	1	1	1	1	1	0	0	0	0	0	0	0	0	0	0	0	0	1	1	1	1	1
Pirque	1	0	0	0	0	0	0	0	0	0	0	0	0	0	0	0	0	0	0	0	0	0	1	1	1	1	1	1	1	1	1	1	0	1	1	0	1	0	0	0	1	1	0	0	1	1	1	1	1
Pitrufquén	1	0	1	1	1	1	0	1	1	1	1	0	1	1	0	1	1	0	0	0	0	1	1	1	1	1	1	1	1	1	1	1	0	0	1	0	1	0	0	0	0	1	1	1	1	1	1	1	1
Placilla	1	1	1	1	1	1	0	1	1	1	1	1	0	0	0	0	0	0	0	0	0	0	1	1	1	1	1	1	1	1	1	0	0	0	0	0	0	0	0	0	0	0	0	0	1	1	1	1	1
Portezuelo	1	1	1	1	1	1	0	1	1	1	1	1	1	1	1	1	1	1	1	1	1	1	1	1	1	1	1	1	1	1	1	1	0	0	0	0	0	0	0	0	0	0	0	0	0	0	0	0	0
Porvenir	1	1	1	1	1	1	1	1	1	1	1	1	0	0	0	0	0	0	0	0	0	0	1	1	1	1	1	1	1	1	1	1	0	0	0	0	0	0	0	0	0	0	0	0	1	1	1	1	1
Pozo Almonte	0	0	0	0	0	0	0	0	0	0	0	0	0	0	0	0	0	0	0	0	0	0	1	1	0	1	0	0	1	1	1	1	0	0	0	0	0	0	0	0	0	0	0	0	1	1	1	1	1
Primavera	1	0	0	0	0	0	0	0	0	0	0	0	0	0	0	0	0	0	0	0	0	0	1	1	1	1	1	1	1	1	1	1	0	1	1	1	1	0	0	0	1	1	1	1	1	1	1	1	1
Providencia	1	1	1	1	1	1	1	1	1	1	1	1	1	1	1	1	1	1	1	1	1	1	1	1	1	1	1	1	1	1	1	1	1	1	1	1	1	0	1	1	1	1	1	1	0	0	0	0	0
Puchuncaví	1	1	1	1	1	1	0	1	1	1	1	0	1	1	1	0	0	0	1	0	1	1	0	0	0	1	0	1	1	0	0	1	0	1	0	0	1	0	0	1	1	0	0	0	1	1	1	1	1
Pucón	1	1	1	1	1	1	0	1	1	1	1	1	1	1	1	1	1	0	1	0	0	1	1	1	1	1	1	1	1	1	1	1	0	1	1	1	1	0	0	1	0	1	1	0	1	1	1	1	1
Pudahuel	1	1	1	1	1	1	0	1	1	1	1	1	0	0	0	0	0	0	0	0	0	0	1	1	1	1	1	1	1	1	1	1	0	0	0	1	0	0	0	0	0	1	0	0	1	1	1	1	1
Puente Alto	1	1	1	1	1	1	0	1	1	1	1	1	0	0	0	0	0	0	0	0	0	0	1	1	1	1	1	1	1	1	1	1	0	1	1	1	1	0	0	0	1	1	1	0	1	1	1	1	1
Puerto Montt	1	1	1	1	1	1	0	1	1	1	1	1	0	0	0	0	0	0	0	0	0	0	1	1	1	1	1	1	1	1	1	1	0	1	1	1	1	0	1	1	1	1	1	1	1	1	1	1	1
Puerto Octay	1	0	0	0	0	0	0	0	0	0	0	0	0	0	0	0	0	0	0	0	0	0	1	1	1	1	1	1	1	1	1	1	0	0	0	0	0	0	0	0	0	0	0	0	1	1	1	1	1
Puerto Varas	1	1	1	1	1	1	1	1	1	1	1	1	0	0	0	0	0	0	0	0	0	0	1	1	1	1	1	1	1	1	1	1	0	0	0	0	0	0	0	0	0	0	0	0	1	1	1	1	1
Pumanque	1	1	1	1	1	1	0	0	1	0	0	0	0	0	0	0	0	0	0	0	0	0	1	1	1	1	1	1	1	1	1	0	0	0	0	0	0	0	0	0	0	0	0	0	1	1	1	1	1
Punitaqui	1	0	0	0	0	0	0	0	0	0	0	0	0	0	0	0	0	0	0	0	0	0	1	1	1	1	1	1	1	1	1	1	0	0	0	0	0	0	0	0	0	0	0	0	1	1	1	1	1
Punta Arenas	1	1	1	1	1	1	0	1	1	1	1	1	1	0	1	1	0	0	1	0	0	0	1	1	1	1	1	1	1	1	1	1	0	1	1	0	0	0	1	0	1	1	1	0	1	1	1	1	1
Puqueldón	1	1	1	1	1	1	0	1	1	1	1	1	0	0	0	0	0	0	0	0	0	0	1	1	1	1	1	1	1	1	1	1	0	0	0	0	0	0	0	0	0	0	0	0	1	1	1	1	1
Purén	1	1	1	1	1	1	0	1	1	1	0	0	1	1	0	1	0	1	0	0	0	0	1	1	1	1	1	1	1	1	1	1	0	0	1	0	0	0	0	0	0	1	0	0	1	1	1	1	1
Purranque	1	1	1	1	1	1	0	1	1	1	1	1	0	0	0	0	0	0	0	0	0	0	1	1	1	1	1	1	1	1	1	1	0	1	1	0	0	0	0	0	1	1	0	0	1	1	1	1	1
Putaendo	1	1	1	1	1	0	0	0	1	1	1	1	1	1	1	1	0	0	1	0	0	1	1	1	1	1	1	1	1	1	1	1	0	1	1	1	0	0	0	1	1	1	1	0	1	1	1	1	1
Putre	1	0	1	0	1	0	0	1	0	0	0	1	1	0	0	0	0	0	0	0	0	0	0	1	1	1	1	0	1	1	1	1	0	0	0	0	1	0	0	0	1	0	0	0	1	0	0	1	0
Puyehue	1	1	1	1	1	1	0	1	1	1	1	1	0	0	0	0	0	0	0	0	0	0	1	1	1	1	1	1	1	1	1	1	0	1	1	0	1	0	0	0	1	1	0	0	1	1	1	1	1
Queilén	1	1	1	1	1	1	0	1	1	1	1	1	0	0	0	0	0	0	0	0	0	0	1	1	1	1	1	1	1	1	1	1	0	0	0	0	0	0	0	0	0	0	0	0	1	1	1	1	1
Quellón	1	1	1	1	1	1	0	1	1	1	1	1	0	0	0	0	0	0	0	0	0	0	1	1	1	1	1	1	1	1	1	1	0	0	0	0	0	0	0	0	0	0	0	0	1	1	1	1	1
Quemchi	1	1	1	1	1	1	0	1	1	1	1	1	1	0	0	0	0	0	0	0	0	0	1	1	1	1	1	1	1	1	1	1	0	1	1	1	1	0	0	0	1	1	1	1	1	1	1	1	1
Quilaco	1	1	1	1	1	1	0	1	1	1	1	1	0	0	0	0	0	0	0	0	0	0	1	1	1	1	1	1	1	1	1	1	0	0	0	0	0	0	0	0	0	0	0	0	1	1	1	1	1
Quilicura	1	1	1	1	1	1	0	1	1	1	1	1	1	1	1	1	1	1	1	1	1	1	1	1	1	1	1	1	1	1	1	1	1	1	1	1	1	1	1	1	1	1	1	1	1	1	1	1	1
Quilleco	0	0	0	0	0	0	0	0	0	0	0	0	0	0	0	0	0	0	0	0	0	0	1	1	1	1	1	1	1	1	1	1	0	0	0	0	0	0	0	0	0	0	0	0	1	1	1	1	1
Quillón	1	0	0	0	0	0	0	0	0	0	0	0	0	0	0	0	0	0	0	0	0	0	1	1	1	1	1	1	1	1	1	1	1	0	1	1	1	0	0	0	0	1	1	1	1	1	1	1	1
Quillota	1	1	1	1	1	1	1	1	1	1	1	1	1	1	1	1	1	1	1	0	1	1	1	1	1	1	1	1	1	1	1	1	0	1	1	1	1	0	0	0	1	1	1	0	1	1	1	1	1
Quilpué	1	1	1	1	1	1	1	1	1	1	1	1	1	0	1	0	0	1	0	0	1	1	1	1	1	1	1	1	1	1	1	1	0	0	0	0	0	0	1	0	1	0	0	0	1	1	1	1	1
Quinchao	1	1	1	1	1	0	0	0	0	0	1	0	0	0	0	0	0	0	0	0	0	0	1	1	1	1	1	1	1	1	1	1	0	0	0	0	0	0	0	0	0	0	0	0	1	1	1	1	1
Quinta De Tilcoco	1	1	1	1	1	1	0	1	1	1	1	1	0	0	0	0	0	0	0	0	0	0	1	1	1	1	1	1	1	1	1	1	0	0	0	0	0	0	0	0	0	0	0	0	0	0	0	0	0
Quinta Normal	1	1	1	1	1	1	0	1	1	1	1	1	1	0	0	0	0	0	0	0	0	0	1	1	1	1	1	1	1	1	1	1	0	1	1	0	0	0	0	0	0	0	1	1	0	0	0	0	0
Quintero	1	1	1	1	1	0	1	1	1	1	1	1	1	0	0	0	0	0	0	0	0	0	1	1	0	1	1	1	1	1	1	1	0	0	0	0	0	0	0	0	1	0	0	0	1	1	1	1	0
Quirihue	1	0	0	0	0	0	0	0	0	0	0	0	0	0	0	0	0	0	0	0	0	0	1	1	1	1	1	1	1	1	1	1	0	0	1	0	0	0	0	0	0	1	0	0	1	1	1	1	1
Rancagua	1	1	1	1	1	1	0	1	1	1	1	1	0	0	0	0	0	0	0	0	0	0	1	1	1	1	1	1	1	1	1	1	0	0	0	0	0	0	0	0	0	0	0	0	1	1	1	1	1
Ránquil	1	1	1	1	0	1	0	1	1	1	0	1	0	0	0	0	0	1	0	0	0	0	1	1	1	1	1	1	1	1	1	1	0	1	1	0	0	0	0	0	1	0	1	1	1	1	1	1	1
Rauco	1	1	1	1	1	1	0	1	1	1	1	1	0	0	0	0	0	0	0	0	0	0	1	1	1	1	1	1	1	1	1	1	0	0	0	0	0	0	0	0	0	0	0	0	1	1	1	1	1
Recoleta	1	1	1	1	1	1	0	1	1	1	1	1	0	0	0	0	0	0	0	0	0	0	1	1	1	1	1	1	1	1	1	1	1	1	1	0	0	0	0	0	0	0	1	1	0	0	0	0	0
Renaico	1	1	1	1	1	1	0	0	1	1	1	0	1	1	0	0	0	0	0	0	0	0	1	1	1	0	1	1	1	1	1	1	0	0	0	0	0	0	0	0	0	0	0	0	1	1	1	1	1
Renca	1	1	1	1	1	1	0	1	1	1	1	1	0	0	0	0	0	0	0	0	0	0	1	1	1	1	1	1	1	1	1	1	0	1	1	1	1	0	0	0	1	1	1	1	1	1	1	1	1
Rengo	1	1	1	1	1	1	1	1	1	1	1	1	0	0	0	0	0	0	0	0	0	0	1	1	1	1	1	1	1	1	1	1	0	0	0	1	1	0	0	1	1	1	1	0	1	1	1	1	1
Requínoa	1	0	0	0	0	0	0	0	0	0	0	0	0	0	0	0	0	0	0	0	0	0	1	1	1	1	1	1	1	1	1	1	0	0	0	0	0	0	0	0	0	0	0	0	0	0	0	0	0
Retiro	1	1	1	1	1	1	0	1	1	1	1	1	0	0	0	0	0	0	0	0	0	0	1	1	1	1	1	1	1	1	1	1	0	0	0	0	0	0	0	0	0	0	1	0	1	1	1	1	1
Rinconada	1	1	1	1	1	1	0	0	1	1	0	1	1	1	1	1	1	1	1	0	0	1	1	1	1	1	1	0	1	1	1	0	0	1	0	0	0	0	0	1	1	0	0	1	1	1	1	1	1
Río Bueno	1	1	1	1	1	1	0	1	1	1	1	1	0	0	0	0	0	0	0	0	0	0	1	1	1	1	1	1	1	1	1	1	0	0	0	0	0	0	0	0	0	0	0	0	1	1	1	1	1
Río Claro	1	1	1	1	1	1	0	1	1	1	1	1	0	0	0	0	0	0	0	0	0	0	1	1	1	1	1	1	1	1	1	1	0	0	0	0	0	0	0	0	0	0	0	0	1	1	1	1	1
Río Hurtado	1	0	0	0	0	0	0	0	0	0	0	0	0	0	0	0	0	0	0	0	0	0	1	1	1	1	1	1	1	1	1	1	0	0	0	0	0	0	0	0	0	0	0	0	0	0	0	0	0
Río Ibáñez	1	1	0	0	0	0	0	0	0	0	0	0	1	0	1	0	0	0	1	0	0	0	1	1	1	1	1	1	1	1	1	1	0	1	0	0	0	0	0	0	1	0	0	0	1	1	1	1	0
Río Negro	1	1	1	1	1	1	0	1	1	1	1	1	0	0	0	0	0	0	0	0	0	0	1	1	1	1	1	1	1	1	1	1	0	0	0	1	0	0	0	0	0	0	0	0	1	1	1	1	1
Río Verde	0	1	1	0	1	1	0	0	0	1	1	0	0	0	1	1	0	0	1	0	0	0	1	1	1	1	1	1	1	1	1	1	0	1	1	0	0	0	0	1	0	1	0	0	1	1	1	1	1
Romeral	0	0	0	0	0	0	0	0	0	0	0	0	0	0	0	0	0	0	0	0	0	0	1	1	1	1	1	1	1	1	1	1	0	0	0	0	0	0	0	0	0	0	0	0	1	1	1	1	1
Saavedra	1	1	1	1	1	1	1	1	0	1	1	1	0	0	0	1	0	0	1	0	0	0	1	1	1	1	1	1	1	1	1	1	0	0	0	1	0	0	0	0	0	1	0	0	1	1	1	1	1
Sagrada Familia	1	1	1	1	1	1	0	1	1	1	1	1	0	0	0	0	0	0	0	0	0	0	1	1	1	1	1	1	1	1	1	1	0	0	0	0	0	0	0	0	0	0	0	0	1	1	1	1	1
Salamanca	1	1	1	1	1	1	0	1	1	1	1	1	0	0	0	0	0	0	0	0	0	0	1	1	1	1	1	1	1	1	1	1	0	0	0	0	0	0	0	0	0	1	0	0	1	1	1	1	1
San Antonio	1	1	1	1	1	1	1	1	1	1	1	1	1	1	1	1	1	1	1	0	1	1	1	1	1	1	1	1	1	1	1	1	0	1	1	1	1	0	1	0	1	1	1	0	1	1	1	1	1
San Bernardo	1	1	1	1	1	1	0	1	1	1	1	1	0	0	0	0	0	0	0	0	0	0	1	1	1	1	1	1	1	1	1	1	0	0	0	0	0	0	0	0	0	0	0	0	1	1	1	1	1
San Carlos	1	1	1	1	1	1	0	1	1	1	1	1	0	0	0	0	0	0	0	0	0	0	1	1	1	1	1	1	1	1	1	1	0	0	0	0	0	0	0	0	0	0	0	0	0	0	0	0	0
San Clemente	1	1	1	1	1	1	0	1	1	1	1	1	0	0	0	0	0	0	0	0	0	0	1	1	1	1	1	1	1	1	1	1	1	1	1	1	1	1	1	1	1	1	1	1	1	1	1	1	1
San Esteban	1	1	1	1	1	1	0	0	1	1	1	0	1	1	1	1	0	1	0	0	0	0	1	1	1	1	1	1	1	1	1	1	0	1	0	1	1	0	0	0	1	0	1	1	1	1	1	1	1
San Fabián	1	0	0	0	0	0	0	0	0	0	0	0	0	0	0	0	0	0	0	0	0	0	1	1	1	1	1	1	1	1	1	1	0	0	0	0	0	0	0	0	0	0	0	0	1	1	1	1	1
San Felipe	1	1	1	1	1	1	0	1	1	1	1	1	1	1	1	1	1	1	1	0	1	1	1	1	1	1	1	1	1	1	1	1	0	1	1	1	1	0	0	0	1	1	1	0	1	1	1	1	1
San Fernando	1	1	1	1	1	1	0	1	1	1	1	1	1	1	1	1	1	1	1	1	1	1	1	1	1	1	1	1	1	1	1	1	0	0	0	0	1	0	0	0	0	0	0	0	1	1	1	1	1
San Gregorio	1	1	0	0	0	0	0	0	0	0	0	0	0	1	1	0	0	1	0	0	0	1	1	1	1	1	1	1	1	1	1	1	0	1	1	0	0	0	0	0	1	0	0	0	1	1	1	1	1
San Ignacio	1	0	0	0	0	0	0	0	0	0	0	0	0	0	0	0	0	0	0	0	0	0	1	1	1	1	1	1	1	1	1	1	0	0	0	1	1	0	0	0	0	0	0	0	1	1	1	1	1
San Javier	1	1	1	1	1	1	0	1	1	1	1	1	0	1	1	1	1	1	1	1	1	1	1	1	1	1	1	1	1	1	1	1	1	1	1	1	1	0	0	0	0	1	1	1	1	1	1	1	1
San Joaquín	1	1	1	1	1	1	0	1	1	1	1	1	0	1	1	1	1	1	1	1	1	1	1	1	1	1	1	1	1	1	1	1	0	0	0	1	0	0	0	1	1	1	0	0	1	1	1	1	1
San José De Maipo	1	1	1	1	1	1	0	1	1	1	1	1	0	0	0	0	0	0	0	0	0	0	1	1	1	1	1	1	1	1	1	1	0	0	0	0	0	0	0	0	0	0	0	1	1	1	1	1	1
San Juan De La Costa	1	1	1	1	1	1	1	1	1	1	1	1	1	1	1	0	0	1	0	0	0	1	1	1	1	1	1	1	1	1	1	1	0	1	1	1	1	0	0	0	1	1	1	0	1	1	1	1	1
San Miguel	1	0	0	0	0	0	0	0	0	0	0	0	0	0	0	0	0	0	0	0	0	0	1	1	1	1	1	1	1	1	1	1	0	0	0	0	0	0	0	0	0	0	0	0	1	1	1	1	1
San Nicolás	1	0	0	0	0	0	0	0	0	0	0	0	0	0	0	0	0	0	0	0	0	0	1	1	1	1	1	1	1	1	1	1	0	0	0	0	0	0	0	0	0	0	0	0	1	1	1	1	1
San Pablo	1	1	1	1	1	1	0	1	1	1	1	0	0	0	0	0	0	0	0	0	0	0	1	1	1	1	1	1	1	1	1	1	0	0	0	0	0	0	0	0	0	0	0	0	1	1	1	1	1
San Pedro	1	1	1	1	1	1	0	1	1	1	1	1	0	0	0	0	0	0	0	0	0	0	1	1	1	1	1	1	1	1	1	1	0	1	1	0	0	0	0	0	1	0	1	1	1	1	1	1	1
San Pedro De Atacama	1	1	1	1	1	1	0	1	1	1	1	1	0	0	0	0	0	0	0	0	0	0	1	1	1	1	1	1	1	1	1	1	0	0	0	0	1	0	0	0	0	0	0	0	1	1	1	1	1
San Pedro De La Paz	1	1	1	1	1	1	0	1	1	1	1	1	0	0	0	0	0	0	0	0	0	0	1	1	1	1	1	1	1	1	1	1	0	0	0	1	1	0	1	0	1	1	0	0	0	0	1	0	0
San Rafael	1	1	1	1	1	1	0	1	1	1	1	1	0	0	0	0	0	0	0	0	0	0	1	1	1	1	1	1	1	1	1	1	0	0	0	0	1	0	0	0	0	0	0	0	1	1	1	1	1
San Ramón	1	1	1	1	1	1	0	1	1	1	1	1	0	0	0	0	0	0	0	0	0	0	1	1	1	1	1	1	1	1	1	1	0	1	1	1	1	0	0	0	1	1	1	1	0	0	0	0	0
San Rosendo	1	0	0	0	0	0	0	0	0	0	0	0	1	0	0	0	0	0	0	0	0	0	1	1	1	1	1	1	1	1	1	1	0	1	0	1	1	0	0	0	0	0	1	1	0	0	0	0	0
San Vicente	1	1	1	1	1	1	1	1	1	1	1	1	0	0	0	0	0	0	0	0	0	0	1	1	1	1	1	1	1	1	1	1	0	0	0	0	0	0	0	0	0	0	0	0	0	0	0	0	0
Santa Bárbara	1	1	1	1	1	1	1	1	1	1	1	1	1	1	1	0	0	1	0	0	0	0	1	1	1	1	1	1	1	1	1	1	0	0	1	0	1	0	0	0	0	1	0	0	1	1	1	1	1
Santa Cruz	0	0	0	0	0	0	0	0	0	0	0	0	0	0	0	0	0	0	0	0	0	0	1	1	1	1	1	1	1	1	1	0	0	0	0	0	0	0	0	0	0	0	0	0	0	0	0	0	0
Santa Juana	1	1	1	1	1	1	0	1	1	1	1	1	0	0	0	0	0	0	0	0	0	0	1	1	1	1	1	1	1	1	1	1	0	0	0	0	0	0	0	0	0	0	0	0	0	0	1	0	0
Santa María	1	1	1	0	1	1	0	0	1	1	0	0	1	0	0	0	0	0	1	0	0	0	1	1	1	1	1	1	1	1	1	0	0	1	0	0	1	0	1	1	1	1	1	0	1	1	1	1	1
Santiago	1	1	1	1	1	1	0	1	1	1	1	1	1	1	1	1	1	1	1	1	1	1	1	1	1	1	1	1	1	1	1	1	1	1	1	1	1	0	0	0	1	1	1	1	1	1	1	1	1
Santo Domingo	1	1	1	1	1	1	0	1	1	1	1	1	1	1	1	1	1	0	1	0	0	0	1	1	1	1	1	1	1	1	1	1	0	0	1	1	0	0	0	0	0	1	1	0	1	1	1	0	0
Sierra Gorda	1	1	1	1	1	1	0	1	1	1	1	1	1	0	0	0	0	0	0	0	0	0	1	1	1	1	1	1	1	1	1	1	0	0	1	1	1	1	0	0	1	1	1	0	1	1	1	1	1
Talagante	1	1	1	1	1	1	0	1	1	1	1	1	0	0	0	1	1	0	1	1	1	0	1	1	1	1	1	1	1	1	1	1	0	0	1	1	0	0	0	0	0	1	0	1	1	1	1	1	1
Talca	1	0	0	0	0	0	0	0	1	1	1	1	0	0	0	0	0	0	0	0	0	0	1	1	1	1	1	1	1	1	1	1	0	0	0	1	1	1	0	1	1	1	0	0	1	1	1	1	1
Talcahuano	1	1	1	1	1	1	0	1	1	1	1	1	1	0	0	0	0	0	0	0	0	0	1	1	1	1	1	1	1	1	1	1	0	0	0	0	0	0	0	0	1	0	0	0	1	1	1	1	1
Taltal	1	0	0	0	0	0	0	0	0	0	0	0	0	0	0	0	0	0	0	0	0	0	1	1	1	1	1	1	1	1	1	1	0	0	0	0	0	0	0	0	0	0	0	0	0	0	0	0	0
Temuco	1	1	1	1	1	1	1	1	1	1	1	1	1	1	1	1	0	1	1	0	0	1	1	1	1	1	1	1	1	1	1	1	1	1	1	1	1	1	0	0	1	1	1	0	0	0	0	0	0
Teno	1	1	1	1	1	1	0	1	1	1	1	1	0	0	0	0	0	0	0	0	0	0	1	1	1	1	1	1	1	1	1	1	0	1	1	0	0	0	0	0	0	0	1	0	1	1	1	1	1
Teodoro Schmidt	1	0	1	1	1	1	1	1	1	1	1	1	1	1	1	1	0	0	1	0	1	1	1	1	1	1	1	1	1	1	1	1	0	1	1	0	0	0	0	0	1	1	0	0	1	1	1	1	1
Tierra Amarilla	1	0	0	0	0	0	0	0	0	0	0	0	0	0	0	0	0	0	0	0	0	0	1	1	1	1	1	1	1	1	1	1	0	0	0	0	0	0	0	0	0	0	0	0	1	1	1	1	1
Tiltil	1	1	1	1	1	1	0	1	1	1	1	1	0	0	0	1	1	0	1	1	1	0	1	1	1	1	1	1	1	1	1	1	0	0	0	0	0	0	0	0	0	0	0	0	1	1	1	1	1
Timaukel	1	0	0	0	0	0	0	0	0	0	0	0	0	0	0	0	0	0	0	0	0	0	1	1	1	1	1	1	1	1	1	1	0	0	0	0	0	0	0	0	0	0	0	0	1	1	1	1	1
Tirúa	1	1	1	1	1	1	1	0	1	1	1	1	0	0	0	0	0	0	0	0	0	0	1	1	1	1	1	1	1	1	1	0	0	0	0	0	0	0	0	0	0	0	0	0	1	1	1	1	1
Tocopilla	1	0	0	0	0	0	0	0	0	0	0	0	0	0	0	0	0	0	0	0	0	0	1	1	1	1	1	1	1	1	1	1	0	0	0	0	0	0	0	0	0	0	0	0	1	1	1	1	1
Toltén	0	1	0	0	0	0	0	0	0	0	0	0	0	1	0	1	0	0	0	0	0	1	1	1	1	1	1	1	1	1	1	1	0	1	0	0	0	0	0	0	1	0	0	0	1	1	1	1	1
Tomé	1	1	1	1	1	1	0	1	1	1	1	1	0	1	1	0	0	1	0	0	0	1	1	1	1	1	1	1	1	1	1	1	0	0	0	0	0	0	0	0	0	0	0	0	0	0	0	0	0
Torres Del Paine	1	1	1	1	1	1	0	1	1	1	1	0	0	0	0	0	0	0	0	0	0	0	1	1	1	1	1	1	1	1	1	1	0	0	0	0	0	0	0	0	0	0	0	0	1	1	1	1	1
Tortel	1	1	1	1	1	1	1	0	0	1	1	0	1	0	0	0	0	0	0	0	1	1	1	1	1	1	1	1	1	1	1	1	0	0	1	0	0	0	0	0	0	0	0	0	1	0	0	1	0
Traiguén	1	1	1	1	1	1	0	1	0	1	1	0	1	1	1	1	0	0	1	0	0	1	1	1	0	1	1	1	1	1	1	1	0	1	1	0	0	0	0	0	1	0	1	0	1	1	1	1	1
Treguaco	1	0	0	0	0	0	0	0	0	0	0	0	0	0	0	0	0	0	0	0	0	0	1	1	1	1	1	1	1	1	1	1	0	0	0	0	0	0	0	0	0	0	0	0	0	0	0	0	0
Tucapel	1	0	0	0	0	0	0	0	0	0	0	0	0	0	0	0	0	0	0	0	0	0	1	1	1	1	1	1	1	1	1	1	0	0	0	1	0	0	0	0	0	0	1	0	1	1	1	1	1
Valdivia	1	1	1	1	1	1	0	1	1	1	1	1	1	0	0	0	0	0	0	0	0	0	1	1	1	1	1	1	1	1	1	1	0	1	1	0	1	0	0	1	1	1	1	1	1	1	1	1	1
Vallenar	0	0	0	0	0	0	0	0	0	0	0	0	1	1	1	0	0	0	0	0	0	0	1	1	1	1	1	1	1	1	1	1	0	0	0	0	0	0	0	0	0	0	0	0	1	1	1	1	1
Valparaíso	1	1	1	0	1	1	1	0	0	0	0	1	1	1	0	1	0	1	1	0	0	1	1	1	1	1	1	1	1	1	1	1	1	1	1	0	0	1	1	0	1	0	0	1	1	1	1	1	1
Vichuquén	1	1	1	1	1	1	0	1	1	1	1	1	0	0	0	0	0	0	0	0	0	0	1	1	1	1	1	1	1	1	1	1	0	0	0	1	1	0	0	0	0	0	1	0	1	1	1	1	1
Victoria	1	1	1	1	1	1	0	0	0	1	1	1	1	1	1	1	1	1	1	0	1	1	0	0	1	1	1	1	1	0	1	0	0	1	1	0	0	0	0	0	1	1	0	0	1	1	1	1	1
Vicuña	1	0	0	0	0	0	0	0	0	0	0	0	0	0	0	0	0	0	0	0	0	0	1	1	1	1	1	1	1	1	1	1	0	0	0	0	0	0	0	0	0	0	0	0	1	1	1	1	1
Vilcún	1	1	1	1	0	1	0	1	1	1	1	0	1	1	1	0	1	1	1	0	0	1	1	1	1	1	1	1	1	1	1	1	0	1	1	0	0	0	0	0	1	1	0	0	1	1	1	1	1
Villa Alegre	1	1	1	1	1	1	0	1	1	1	1	1	0	0	0	0	0	0	0	0	0	0	1	1	1	1	1	1	1	1	1	1	0	1	1	0	0	0	0	0	0	0	0	1	1	1	1	1	1
Villa Alemana	1	1	1	1	1	1	1	1	1	1	1	0	1	0	1	0	1	1	0	0	0	1	1	1	1	1	1	1	1	1	1	1	0	1	1	0	1	0	1	0	1	1	1	0	0	0	0	0	0
Villarrica	1	1	1	1	1	1	1	1	1	1	1	1	0	1	1	1	1	0	0	0	0	1	1	1	1	1	1	1	1	1	1	1	0	1	1	1	0	0	0	0	0	1	1	0	1	1	1	1	1
Viña Del Mar	1	1	1	1	0	0	0	1	1	1	0	1	1	0	0	0	0	0	0	0	0	1	1	1	1	1	1	1	1	1	1	1	0	0	0	0	0	0	0	0	0	0	0	0	1	1	1	1	1
Vitacura	1	1	1	1	1	1	0	1	1	1	1	1	0	1	1	1	1	1	1	1	1	1	1	1	1	1	1	1	1	1	1	1	0	1	1	1	1	0	1	1	1	1	1	1	1	1	1	1	1
Yerbas Buenas	1	1	1	1	1	1	0	1	1	1	1	1	0	0	0	0	0	0	0	0	0	0	1	1	1	1	1	1	1	1	1	1	0	1	0	1	0	0	0	0	1	0	0	0	1	1	1	1	1
Yumbel	0	1	1	1	1	1	0	1	1	1	1	1	0	0	0	0	0	0	0	0	0	0	1	1	1	1	1	1	1	1	1	1	0	0	1	0	0	0	0	0	0	1	0	0	1	1	1	1	1
Yungay	1	1	1	1	1	1	0	1	1	1	1	1	0	0	0	0	0	0	0	0	0	0	1	1	1	1	1	1	1	1	1	1	0	0	0	0	0	0	0	0	0	0	0	0	1	1	1	1	1
Zapallar	1	1	1	1	1	1	0	1	1	1	1	1	1	1	0	0	0	1	0	0	0	0	1	1	1	1	1	1	1	1	1	1	0	1	1	1	1	0	0	0	1	1	1	1	1	1	1	1	1
[truncated: 39 more columns]

## Sheet: Puntaje Simple por Factor
Dimensión	Factor 1: Información de unidades municipales y funcionarios	Factor 2: Integración	Factor 3: Transparencia	Factor 4: Información Educacional y de Salud	Factor 5: Ley de Lobby	Factor 6: Concejo Comunal de Organizaciones de la Sociedad Civil (COSOC)	Factor 7: Beneficios, Deberes y Pagos	Factor 8: Contenido Informativo	Factor 9: Proyectos Comunales	Factor 10: Tramites Online	Factor 11: Valores	Factor 12: Consultas	Factor 13: Orientación	Factor 14: Medio Ambiente	Factor 15: Seguridad y Confiabilidad	Puntaje Simple Total
Carga Factorial
Comuna
Isla de Maipo	6	3	6	2	4	3	1	0	0	2	0	1	2	1	0	31
Algarrobo	10	6	10	7	6	3	1	0	0	1	2	0	0	2	1	49
Alhué	11	0	10	0	6	0	1	1	0	0	0	0	1	0	0	30
Alto Biobío	1	0	10	0	6	0	0	0	0	0	0	0	0	0	0	17
Alto Del Carmen	11	2	10	2	6	0	0	0	0	0	0	0	0	0	0	31
Alto Hospicio	0	0	0	0	0	1	1	0	0	0	0	0	0	0	0	2
Ancud	11	10	10	0	6	1	3	1	0	0	0	0	0	3	0	45
Andacollo	1	0	9	0	6	1	0	0	0	0	1	0	0	1	0	19
Angol	9	2	10	5	6	5	1	0	1	1	2	0	0	3	0	45
Antofagasta	12	10	10	3	6	6	3	0	0	5	2	0	0	2	1	60
Antuco	11	0	10	0	6	6	3	1	0	0	0	0	0	1	0	38
Arauco	11	0	10	0	6	6	1	1	0	0	3	0	0	0	0	38
Arica	11	0	7	2	6	2	3	0	0	0	3	0	0	1	1	36
Aysén	11	8	10	3	5	5	1	3	1	1	2	0	0	0	0	50
Buin	11	0	10	0	6	1	1	1	0	0	0	0	0	0	0	30
Bulnes	10	0	10	4	6	0	0	0	0	0	0	0	0	0	0	30
Cabildo	9	5	10	7	6	2	0	3	1	4	0	1	0	2	0	50
Cabo De Hornos	9	3	10	2	5	3	0	2	1	0	0	0	0	1	0	36
Cabrero	11	0	10	0	6	0	3	1	0	0	0	0	0	2	0	33
Calama	2	0	6	0	0	0	0	0	0	3	0	0	1	0	0	12
Calbuco	11	0	10	0	6	0	3	1	0	0	0	0	0	3	0	34
Caldera	1	0	10	0	1	6	1	0	0	2	0	0	0	0	0	21
Calera	8	2	10	2	5	5	1	0	1	0	0	0	1	2	0	37
Calera De Tango	0	0	0	1	0	0	0	0	0	0	0	0	0	0	0	1
Calle Larga	2	3	10	8	4	1	1	3	0	2	0	0	2	1	0	37
Camarones	2	1	10	4	6	3	1	0	0	2	3	0	0	0	0	32
Camiña	8	0	7	0	0	0	0	0	0	0	0	0	0	0	0	15
Canela	4	0	10	0	0	0	1	0	0	0	0	0	0	0	0	15
Cañete	11	0	10	8	6	1	0	1	0	0	0	0	0	3	0	40
Carahue	8	4	10	1	0	3	0	3	0	0	0	0	2	3	0	34
Cartagena	11	1	10	2	5	3	2	3	1	0	2	1	0	1	1	43
Casablanca	11	8	10	8	6	3	2	1	2	2	0	0	0	3	1	57
Castro	11	0	10	0	6	0	2	1	0	0	0	0	0	0	0	30
Catemu	12	0	10	2	5	1	0	2	0	0	0	0	0	0	0	32
Cauquenes	1	0	10	0	6	0	1	1	0	0	2	0	0	1	0	22
Cerrillos	12	0	10	0	6	6	3	1	0	1	2	0	0	0	0	41
Cerro Navia	11	0	10	0	6	1	1	1	0	0	0	0	0	0	0	30
Chaitén	1	0	10	0	6	0	1	1	0	0	0	0	0	0	0	19
Chanco	11	0	10	0	6	0	0	1	0	0	0	0	0	1	0	29
Chañaral	11	0	10	0	0	1	1	0	0	1	0	0	1	1	0	26
Chépica	10	0	10	6	6	1	0	1	0	1	0	0	0	1	0	36
Chiguayante	11	10	10	0	6	1	3	1	0	1	2	0	1	3	0	49
Chile Chico	1	0	10	0	6	0	1	1	0	0	0	0	0	0	0	19
Chillán	11	10	10	0	6	0	1	0	0	0	0	0	0	3	0	41
Chillán Viejo	1	0	9	0	0	0	0	0	0	0	0	0	0	0	0	10
Chimbarongo	11	5	10	1	6	0	0	1	0	0	0	0	0	1	0	35
Cholchol	8	3	10	2	5	4	0	3	1	1	0	0	1	1	0	39
Chonchi	11	0	10	0	6	0	2	1	0	0	0	0	0	0	0	30
Cisnes	2	2	10	1	5	2	0	2	1	2	0	0	0	3	0	30
Cobquecura	1	1	10	3	0	6	0	0	0	0	0	0	0	1	0	22
Cochamó	11	0	10	0	6	0	2	1	0	0	0	0	0	0	0	30
Cochrane	7	0	9	1	4	3	0	3	1	1	0	1	1	0	0	31
Codegua	11	0	10	1	6	1	2	1	0	1	0	0	0	0	1	34
Coelemu	1	0	10	0	0	0	1	0	0	0	0	0	0	0	0	12
Coihueco	1	0	10	0	0	0	1	0	0	0	0	0	0	2	0	14
Coinco	11	0	10	4	6	1	7	1	0	3	0	0	1	0	0	44
Colbún	12	0	10	3	6	1	0	0	0	0	0	0	0	2	0	34
Colchane	11	0	10	0	0	0	0	0	0	1	0	0	0	0	0	22
Colina	11	0	10	6	6	0	6	1	0	1	0	0	0	1	0	42
Collipulli	11	4	10	2	5	3	0	2	1	1	2	0	0	0	1	42
Coltauco	11	0	10	0	6	0	1	1	0	0	0	1	0	0	0	30
Combarbalá	1	0	10	0	6	0	2	0	0	0	0	0	0	0	0	19
Concepción	11	0	10	0	6	1	3	1	0	2	2	0	0	1	0	37
Conchalí	10	0	10	2	6	1	1	1	0	0	0	0	0	0	2	33
Concón	8	6	7	7	6	1	0	3	0	1	2	0	1	0	1	43
Constitución	0	0	10	0	6	0	1	0	0	0	0	0	0	0	0	17
Contulmo	7	0	10	0	6	0	0	1	0	0	0	0	0	0	0	24
Copiapó	0	1	9	0	6	1	1	0	0	0	0	0	0	1	0	19
Coquimbo	11	0	10	4	6	1	1	0	0	1	2	0	0	0	0	36
Coronel	11	0	10	0	6	1	2	1	0	1	0	0	0	2	0	34
Corral	6	0	0	4	6	1	0	0	0	0	0	0	1	0	0	18
Coyhaique	12	6	10	4	5	4	1	3	0	1	1	0	0	0	0	47
Cunco	12	7	10	2	4	1	1	2	0	1	2	0	1	1	1	45
Curacautín	11	6	9	5	4	3	1	2	1	0	2	0	0	2	0	46
Curacaví	11	0	10	0	6	6	1	1	0	0	0	0	0	0	0	35
Curaco De Vélez	5	1	10	0	6	0	2	1	0	0	0	0	0	3	0	28
Curanilahue	11	10	10	10	6	1	0	1	0	0	2	0	0	3	0	54
Curarrehue	9	1	10	3	5	3	0	3	0	0	0	0	1	0	0	35
Curepto	11	0	4	0	6	0	1	0	0	0	0	0	0	2	0	24
Curicó	11	0	10	5	6	1	4	1	0	0	2	0	0	1	0	41
Dalcahue	11	0	10	0	6	1	2	1	0	0	0	0	0	0	0	31
Diego De Almagro	11	2	10	2	6	0	1	0	0	1	0	0	0	0	0	33
Doñihue	11	0	10	0	6	0	2	1	0	0	0	0	0	1	0	31
El Bosque	12	0	10	5	6	1	1	1	0	0	2	0	0	3	0	41
El Carmen	1	1	10	0	6	0	3	0	0	2	2	0	0	3	0	28
El Monte	11	0	10	2	6	1	1	1	0	0	0	0	0	2	0	34
El Quisco	11	8	10	9	5	5	1	3	0	1	2	1	2	2	1	61
El Tabo	10	7	10	3	4	1	3	3	0	0	0	0	0	1	1	43
Empedrado	11	0	10	0	0	0	0	0	0	0	2	0	0	2	0	25
Ercilla	7	3	10	3	5	3	0	3	1	0	2	0	1	0	0	38
Estación Central	12	0	10	4	6	1	6	1	0	1	0	0	0	1	0	42
Florida	11	0	10	0	6	1	3	1	0	0	2	0	0	2	0	36
Freire	8	1	10	6	5	3	1	1	0	0	2	0	1	2	0	40
Freirina	0	0	10	0	6	0	0	0	0	1	0	0	0	0	0	17
Fresia	11	0	10	0	6	6	2	1	0	0	2	0	0	0	0	38
Frutillar	11	1	10	4	6	1	2	1	0	0	0	0	0	3	0	39
Futaleufú	11	10	10	8	6	6	2	1	0	0	0	0	0	0	3	57
Futrono	10	0	10	0	6	6	2	1	0	0	0	0	0	3	0	38
Galvarino	8	4	10	1	5	3	0	3	1	0	0	0	0	1	0	36
General Lagos	1	0	5	0	6	1	1	0	0	0	1	0	0	0	0	15
Gorbea	8	7	10	8	5	4	1	3	1	0	0	0	1	2	1	51
Graneros	11	0	10	0	6	0	1	1	0	0	2	0	0	0	0	31
Guaitecas	9	5	10	3	4	3	0	3	0	0	0	0	1	2	0	40
Hijuelas	11	2	9	9	5	1	0	2	0	1	0	0	2	0	1	43
Hualaihué	10	0	10	0	6	0	2	1	0	0	0	0	0	3	0	32
Hualañé	11	0	10	0	6	0	1	1	0	0	0	0	0	0	0	29
Hualpén	10	0	10	11	6	0	2	1	0	0	0	0	0	2	0	42
Hualqui	11	9	10	0	6	1	2	1	0	3	0	0	0	0	0	43
Huara	1	0	10	0	0	0	1	0	0	2	0	0	0	0	0	14
Huasco	1	2	10	0	6	1	0	0	0	1	0	0	0	2	0	23
Huechuraba	11	0	10	10	6	6	3	1	0	0	1	0	0	3	0	51
Illapel	1	0	10	0	6	0	0	0	0	0	2	0	0	0	0	19
Independencia	11	0	10	8	6	1	2	1	0	0	0	0	0	3	0	42
Iquique	11	7	7	4	6	4	2	0	0	3	2	0	0	0	2	48
Juan Fernández	8	1	6	7	4	0	0	3	0	0	2	1	0	2	0	34
La Cisterna	11	10	10	9	6	1	3	1	0	0	0	0	0	2	2	55
La Cruz	8	3	9	9	6	4	2	3	1	3	2	0	0	1	1	52
La Estrella	11	0	10	0	6	1	1	1	0	0	2	0	0	3	0	35
La Florida	11	10	10	0	6	1	5	1	0	0	0	0	0	2	0	46
La Granja	11	0	10	4	6	0	3	1	0	0	0	0	0	2	0	37
La Higuera	0	0	10	1	6	0	2	0	0	0	0	0	0	0	0	19
La Ligua	11	4	10	4	5	3	1	2	1	3	0	0	0	1	2	47
La Pintana	12	1	10	5	6	1	2	1	0	0	0	0	0	0	1	39
La Reina	11	5	10	0	6	6	6	1	0	0	0	0	0	2	1	48
La Serena	10	0	10	0	6	0	1	0	0	0	2	0	0	3	0	32
La Unión	11	1	10	8	6	1	2	1	0	0	2	0	0	3	0	45
Lago Ranco	11	0	10	0	6	0	1	1	0	0	0	0	0	0	0	29
Lago Verde	10	0	7	4	3	1	0	0	1	2	0	0	0	3	1	32
Laguna Blanca	7	0	10	3	3	3	2	3	0	0	0	0	0	0	0	31
Laja	10	0	10	4	6	0	3	1	0	0	0	0	0	1	0	35
Lampa	1	0	10	0	6	1	1	1	0	0	0	0	0	0	0	20
Lanco	1	0	10	0	6	0	3	1	0	0	0	0	0	3	0	24
Las Cabras	11	0	10	0	0	0	0	0	0	1	0	0	0	0	0	22
Las Condes	11	10	10	11	6	6	6	1	0	2	2	0	0	3	2	70
Lautaro	11	1	10	5	5	2	4	2	0	2	0	0	1	2	0	45
Lebu	11	0	10	0	6	0	1	1	0	0	0	0	0	1	0	30
Licantén	11	0	10	12	6	1	1	0	0	0	2	0	0	0	0	43
Limache	9	7	10	6	5	3	1	3	1	1	0	1	0	1	1	49
Linares	11	0	10	6	6	0	1	1	0	0	0	0	0	0	0	35
Litueche	11	0	10	7	6	6	1	1	0	0	0	0	0	3	0	45
Llaillay	3	1	10	3	4	3	1	1	0	1	0	0	0	2	0	29
Llanquihue	11	0	10	0	6	1	2	1	0	0	0	0	0	0	0	31
Lo Barnechea	12	10	10	11	6	6	8	2	3	4	0	0	0	3	2	77
Lo Espejo	11	0	10	5	6	0	3	1	0	0	2	0	0	0	0	38
Lo Prado	11	0	10	0	6	6	2	1	0	0	0	0	0	0	1	37
Lolol	11	0	10	8	6	0	0	1	0	0	2	0	0	0	0	38
Loncoche	10	5	10	5	4	4	1	3	2	0	0	0	1	2	0	47
Longaví	0	0	10	2	0	0	0	0	0	0	0	0	0	0	0	12
Lonquimay	10	5	10	5	5	4	1	3	2	0	0	0	1	0	0	46
Los Álamos	11	0	10	0	6	3	0	1	0	1	2	0	0	1	0	35
Los Andes	11	2	10	10	5	3	2	0	0	1	0	0	1	1	1	47
Los Ángeles	11	4	10	0	6	6	0	1	0	0	2	0	0	1	0	41
Los Lagos	11	0	10	0	6	0	2	1	0	0	0	0	0	3	0	33
Los Muermos	11	0	10	8	6	1	2	1	0	0	2	0	0	3	0	44
Los Sauces	10	5	10	4	5	3	1	3	1	0	0	0	2	2	0	46
Los Vilos	0	0	10	0	6	0	0	0	0	0	0	0	0	2	0	18
Lota	11	0	10	0	6	0	2	1	0	0	0	0	0	0	0	30
Lumaco	9	6	10	4	3	5	1	2	1	0	0	0	0	0	0	41
Machalí	11	9	10	8	0	6	3	0	0	3	2	0	0	0	1	53
Macul	11	0	10	0	6	6	3	1	0	0	0	0	0	1	0	38
Máfil	1	0	10	0	6	0	1	1	0	0	0	0	0	0	0	19
Maipú	11	5	10	0	6	1	3	1	0	4	2	0	0	1	1	45
Malloa	11	0	10	8	6	1	2	0	0	0	0	0	0	0	0	38
Marchihue	11	0	10	0	6	1	1	1	0	0	0	0	0	0	0	30
María Elena	1	0	1	1	6	0	1	0	0	0	2	0	1	0	0	13
María Pinto	1	0	10	0	6	6	1	1	0	0	2	0	0	0	0	27
Mariquina	12	0	10	3	0	0	2	0	0	0	0	0	0	3	0	30
Maule	11	0	9	0	6	0	1	0	3	0	0	0	0	0	0	30
Maullín	11	0	10	0	6	0	2	1	0	0	0	0	0	0	0	30
Mejillones	11	1	10	0	0	1	2	1	0	2	0	0	0	1	0	29
Melipeuco	5	6	10	2	5	3	0	3	1	2	2	0	1	1	1	42
Melipilla	11	0	10	0	6	1	3	1	0	1	0	0	0	2	0	35
Molina	11	0	10	0	6	1	1	1	0	0	0	0	0	1	0	31
Monte Patria	1	0	10	0	6	0	1	0	0	0	2	0	0	0	0	20
Mostazal	11	10	10	7	6	0	2	1	0	0	0	0	0	1	3	51
Mulchén	11	0	10	0	6	1	3	1	0	0	2	0	0	1	0	35
Nacimiento	11	0	10	0	6	1	3	1	0	0	2	0	0	0	0	34
Nancagua	10	10	10	0	6	0	0	1	0	0	0	0	0	0	0	37
Natales	11	1	10	0	6	0	1	0	0	0	0	0	0	3	0	32
Navidad	11	0	10	0	6	1	0	1	0	0	0	0	0	1	0	30
Negrete	11	0	10	0	6	0	1	1	0	0	0	0	0	1	0	30
Ninhue	0	0	10	0	0	0	0	0	0	0	0	0	0	0	0	10
Nogales	5	0	10	3	5	3	0	3	0	0	2	0	1	1	0	33
Nueva Imperial	9	6	10	4	5	3	1	3	0	1	2	0	1	1	1	47
Ñiquén	1	0	5	0	0	5	0	0	0	0	1	0	0	0	0	12
Ñuñoa	11	0	10	0	0	1	5	1	0	0	0	0	0	0	0	28
O'Higgins	7	0	9	6	5	3	0	2	0	1	0	0	0	2	0	35
Olivar	11	0	10	0	6	1	1	1	0	0	0	0	1	2	0	33
Ollagüe	1	0	0	0	0	0	1	0	0	0	2	0	0	0	0	4
Olmué	9	7	10	8	5	1	0	2	1	0	1	0	2	0	0	46
Osorno	12	0	10	1	6	6	2	1	0	2	2	0	0	1	0	43
Ovalle	11	0	10	0	6	1	1	0	0	4	2	0	0	1	0	36
Padre Hurtado	10	3	7	2	6	2	1	2	0	1	0	0	1	0	0	35
Padre Las Casas	11	7	10	5	5	4	3	3	1	2	2	0	1	2	1	57
Paiguano	0	0	10	0	6	0	0	0	0	0	0	0	0	1	0	17
Paillaco	11	0	10	4	6	1	1	1	0	0	2	0	0	3	0	39
Paine	11	1	10	6	6	6	1	1	0	0	2	0	0	2	2	48
Palena	11	0	10	0	6	1	1	1	0	0	0	0	0	3	0	33
Palmilla	11	0	9	0	6	0	0	1	0	0	0	0	0	2	0	29
Panguipulli	10	0	10	0	6	0	2	0	0	0	0	0	0	3	2	33
Panquehue	9	5	10	6	5	4	0	3	1	0	2	0	1	1	0	47
Papudo	8	5	10	10	4	2	0	2	1	0	2	0	0	2	0	46
Paredones	11	0	10	3	6	1	0	1	0	0	2	0	0	2	1	37
Parral	1	3	10	0	6	6	1	1	0	0	0	0	0	1	0	29
Pedro Aguirre Cerda	11	0	10	9	6	1	2	1	0	0	0	0	0	0	0	40
Pelarco	11	0	10	0	6	0	1	0	0	1	0	0	1	2	0	32
Pelluhue	11	0	10	0	6	0	1	1	0	0	0	0	0	1	0	30
Pemuco	1	1	10	0	6	0	1	0	0	3	0	0	0	3	0	25
Pencahue	11	0	10	0	0	0	0	0	0	0	0	0	0	0	0	21
Penco	11	0	10	0	6	1	2	1	0	0	0	0	0	0	0	31
Peñaflor	12	5	9	12	6	4	1	2	3	1	3	0	0	2	1	61
Peñalolén	11	9	10	9	6	1	3	1	0	0	2	0	0	0	0	52
Peralillo	11	0	10	0	0	0	1	0	0	0	0	0	0	1	0	23
Perquenco	8	4	10	4	4	3	1	3	1	0	2	0	0	2	1	43
Petorca	2	6	10	1	5	1	1	2	1	1	0	0	0	0	1	31
Peumo	11	0	10	0	0	1	1	1	0	0	0	0	0	0	0	24
Pica	11	1	9	1	6	0	1	0	0	1	0	0	0	1	0	31
Pichidegua	11	0	10	2	0	1	1	0	0	0	0	0	0	2	0	27
Pichilemu	11	0	10	0	6	0	1	1	0	0	0	0	0	2	0	31
Pinto	12	0	10	0	6	0	0	0	0	1	2	0	0	3	0	34
Pirque	1	0	10	5	6	1	2	1	0	0	0	0	0	0	0	26
Pitrufquén	9	5	10	5	6	4	1	3	1	0	0	0	1	2	1	48
Placilla	11	0	9	0	6	0	0	1	0	0	0	0	0	0	0	27
Portezuelo	11	10	10	0	0	0	0	0	0	0	0	0	0	0	0	31
Porvenir	12	0	10	0	6	0	1	1	0	0	2	0	0	0	0	32
Pozo Almonte	0	0	7	0	6	1	1	0	0	0	0	0	0	1	0	16
Primavera	1	0	10	8	6	0	1	1	0	0	0	0	0	2	0	29
Providencia	12	10	10	11	0	6	7	1	0	0	0	0	0	3	2	62
Puchuncaví	10	6	4	4	5	1	2	3	0	2	0	0	1	2	0	40
Pucón	11	7	10	7	5	5	0	3	1	1	0	0	1	1	1	53
Pudahuel	11	0	10	2	6	0	3	1	0	1	0	0	0	0	0	34
Puente Alto	11	0	10	7	6	0	4	1	0	0	2	0	0	0	0	41
Puerto Montt	11	0	10	10	6	1	4	1	0	1	0	0	0	3	0	47
Puerto Octay	1	0	10	0	6	0	0	1	0	0	0	0	0	0	0	18
Puerto Varas	12	0	10	0	6	6	3	1	0	0	0	0	0	0	0	38
Pumanque	7	0	9	0	6	0	0	1	0	0	0	0	0	0	0	23
Punitaqui	1	0	10	0	6	6	1	0	0	0	0	0	0	2	0	26
Punta Arenas	11	4	10	6	5	4	3	2	0	3	0	0	0	1	1	50
Puqueldón	11	0	10	0	6	1	1	1	0	0	0	0	0	3	0	33
Purén	9	4	10	2	5	5	0	3	0	0	0	0	1	2	0	41
Purranque	11	0	10	4	6	5	2	1	0	0	0	0	0	0	3	42
Putaendo	9	6	10	7	6	1	0	2	1	1	0	0	0	1	0	44
Putre	5	1	8	2	3	5	1	0	0	1	0	0	0	0	0	26
Puyehue	11	0	10	5	6	0	2	1	0	0	0	0	0	0	1	36
Queilén	11	0	10	0	6	1	2	1	0	0	0	0	0	3	3	37
Quellón	11	0	10	0	6	1	2	1	0	0	0	0	0	0	0	31
Quemchi	11	1	10	8	6	1	2	1	0	0	0	0	0	0	0	40
Quilaco	11	0	10	0	6	0	1	1	0	0	0	0	0	0	0	29
Quilicura	11	10	10	12	6	1	6	2	0	0	0	0	0	3	2	63
Quilleco	0	0	10	0	6	0	0	0	0	0	2	0	2	0	0	20
Quillón	1	0	10	7	6	0	1	0	0	0	0	0	0	0	0	25
Quillota	12	9	10	7	5	3	7	3	0	0	0	0	1	2	1	60
Quilpué	12	5	10	2	5	4	4	3	1	0	0	0	1	2	1	50
Quinchao	6	0	10	0	6	0	2	1	0	0	0	0	0	0	0	25
Quinta De Tilcoco	11	0	10	0	0	1	2	0	0	0	0	0	0	0	0	24
Quinta Normal	11	1	10	4	0	6	2	0	0	0	0	0	0	0	1	35
Quintero	11	1	9	1	4	3	0	3	1	2	0	0	0	2	1	38
Quirihue	1	0	10	2	6	0	0	0	0	1	0	0	0	2	0	22
Rancagua	11	0	10	0	6	1	4	1	0	5	0	0	0	2	0	40
Ránquil	9	1	10	5	6	6	1	0	0	3	2	0	0	3	1	47
Rauco	11	0	10	0	6	6	2	0	0	0	0	0	0	0	0	35
Recoleta	11	0	10	5	0	6	3	0	0	0	0	0	1	0	0	36
Renaico	9	2	9	0	5	4	0	1	0	0	0	0	1	0	0	31
Renca	11	0	10	8	6	1	4	1	0	0	0	0	0	2	0	43
Rengo	12	0	10	6	6	0	1	1	0	0	2	0	1	0	0	39
Requínoa	1	0	10	0	0	1	1	1	0	0	2	0	0	0	0	16
Retiro	11	0	10	1	6	1	0	1	0	1	0	0	1	0	0	32
Rinconada	9	8	8	4	5	5	0	0	0	0	0	0	0	0	1	40
Río Bueno	11	0	10	0	6	1	3	1	0	0	0	0	0	0	0	32
Río Claro	11	0	10	0	6	1	0	1	0	0	0	0	0	1	0	30
Río Hurtado	1	0	10	0	0	1	2	1	0	0	0	0	0	0	0	15
Río Ibáñez	2	3	10	2	4	3	1	2	1	0	0	1	0	0	0	29
Río Negro	11	0	10	1	6	1	1	1	0	0	1	0	1	0	0	33
Río Verde	6	3	10	4	5	2	0	3	0	0	0	0	0	0	0	33
Romeral	0	0	10	0	6	2	1	1	0	0	0	0	0	0	0	20
Saavedra	11	2	10	2	5	3	0	3	0	0	0	0	1	3	1	41
Sagrada Familia	11	0	10	0	6	0	1	1	0	0	0	0	0	0	0	29
Salamanca	11	0	10	1	6	6	0	1	0	1	0	0	0	0	0	36
San Antonio	12	9	10	8	5	4	3	3	2	1	2	0	0	2	1	62
San Bernardo	11	0	10	0	6	6	1	1	0	0	2	0	0	1	0	38
San Carlos	11	0	10	0	0	0	1	0	0	0	0	0	0	3	0	25
San Clemente	11	0	10	12	6	0	1	0	0	0	2	0	1	3	0	46
San Esteban	9	5	10	6	5	2	0	2	1	3	1	0	1	1	0	46
San Fabián	1	0	10	0	6	0	0	0	0	0	0	0	0	2	0	19
San Felipe	11	9	10	7	5	2	3	3	1	1	0	0	0	2	0	54
San Fernando	11	10	10	1	6	1	1	1	0	0	0	0	0	3	0	44
San Gregorio	2	4	10	3	5	3	0	3	1	0	0	0	1	1	0	33
San Ignacio	1	0	10	2	6	0	1	0	0	3	0	0	1	0	0	24
San Javier	11	9	10	8	6	1	1	1	0	0	2	0	0	2	0	51
San Joaquín	11	9	10	4	6	6	3	1	0	0	0	0	0	0	0	50
San José De Maipo	11	0	10	1	6	1	4	1	0	2	2	0	0	2	0	40
San Juan De La Costa	12	5	10	7	6	0	2	1	0	0	0	0	0	0	0	43
San Miguel	1	0	10	0	6	0	3	1	0	0	0	0	0	1	0	22
San Nicolás	1	0	10	0	6	0	0	0	0	0	0	0	0	2	0	19
San Pablo	10	0	10	0	6	0	2	1	0	0	0	0	0	0	0	29
San Pedro	11	0	10	5	6	0	1	1	0	0	0	0	0	0	0	34
San Pedro De Atacama	11	0	10	1	6	0	1	0	0	2	1	0	0	0	0	32
San Pedro De La Paz	11	0	10	5	1	0	4	1	0	1	0	0	0	0	0	33
San Rafael	11	0	10	1	6	0	0	1	0	0	0	0	0	0	0	29
San Ramón	11	0	10	8	0	1	0	0	0	0	0	0	0	0	0	30
San Rosendo	1	1	10	5	0	0	0	0	0	0	0	0	0	3	0	20
San Vicente	12	0	10	0	0	1	1	0	0	0	2	0	1	0	0	27
Santa Bárbara	12	4	10	3	6	6	3	0	0	0	2	0	0	2	0	48
Santa Cruz	0	0	9	0	0	0	0	0	0	0	0	0	0	0	0	9
Santa Juana	11	0	10	0	1	0	0	1	0	0	2	0	0	1	0	26
Santa María	7	2	9	7	5	5	0	3	0	1	0	0	0	2	1	42
Santiago	11	10	10	9	6	6	6	1	0	5	0	0	0	3	1	68
Santo Domingo	11	6	10	4	4	4	1	2	0	3	3	0	0	2	1	51
Sierra Gorda	11	1	10	7	6	0	1	0	0	4	0	0	0	1	0	41
Talagante	11	5	10	4	6	1	1	1	0	0	0	0	0	0	0	39
Talca	5	0	10	6	6	0	2	0	0	2	0	0	0	0	0	31
Talcahuano	11	1	10	1	6	3	1	1	0	0	0	0	0	2	0	36
Taltal	1	0	10	0	0	1	0	0	0	0	0	0	1	0	0	13
Temuco	12	7	10	9	0	3	3	3	1	2	0	0	0	2	2	54
Teno	11	0	10	3	6	0	1	0	0	0	0	0	0	3	0	34
Teodoro Schmidt	11	7	10	4	5	3	0	0	2	0	2	0	1	2	1	48
Tierra Amarilla	1	0	10	0	6	0	0	0	0	1	0	0	1	0	0	19
Tiltil	11	5	10	0	6	6	0	1	0	0	0	0	0	0	0	39
Timaukel	1	0	10	0	6	0	1	0	0	0	0	0	0	0	0	18
Tirúa	11	0	9	0	6	1	0	1	0	0	0	0	0	0	0	28
Tocopilla	1	0	10	0	6	0	0	0	0	0	2	1	0	1	0	21
Toltén	1	3	10	2	5	5	0	3	1	0	0	0	1	1	0	32
Tomé	11	4	10	0	0	0	2	3	0	0	2	1	0	2	0	35
Torres Del Paine	10	0	10	0	6	0	1	0	0	0	0	0	0	3	0	30
Tortel	9	3	10	1	2	2	1	3	0	0	0	0	0	1	0	32
Traiguén	9	6	9	4	5	3	3	3	1	0	0	0	0	2	1	46
Treguaco	1	0	10	0	0	1	0	0	0	1	2	0	0	0	0	15
Tucapel	1	0	10	2	6	5	0	0	0	0	0	0	0	0	0	24
Valdivia	11	1	10	8	6	6	2	1	0	0	2	0	0	0	0	47
Vallenar	0	3	10	0	6	0	0	0	0	1	0	0	0	1	0	21
Valparaíso	7	6	10	7	6	2	2	0	2	3	0	1	0	1	1	48
Vichuquén	11	0	10	3	6	6	0	1	0	1	0	0	0	1	0	39
Victoria	9	9	6	4	6	6	0	1	0	2	2	0	1	3	2	51
Vicuña	1	0	10	0	6	0	0	0	0	1	0	0	0	3	0	21
Vilcún	9	7	10	4	5	5	1	3	2	1	2	0	0	2	0	51
Villa Alegre	11	0	10	3	6	0	1	1	0	1	2	0	0	0	0	35
Villa Alemana	11	5	10	7	0	2	1	3	1	2	0	0	0	2	1	45
Villarrica	12	5	10	5	5	4	1	3	1	1	2	0	0	2	0	51
Viña Del Mar	8	2	10	0	5	3	3	3	0	2	0	0	1	2	2	41
Vitacura	11	9	10	10	6	1	3	1	0	3	2	0	0	3	2	61
Yerbas Buenas	11	0	10	3	6	1	0	1	0	0	0	0	1	1	0	34
Yumbel	10	0	10	2	6	0	0	0	0	1	2	0	0	0	0	31
Yungay	11	0	10	0	6	0	0	0	0	0	0	0	0	3	0	30
Zapallar	11	3	10	8	5	1	3	3	1	3	0	0	0	2	1	51

## Sheet: Puntaje Ponderado CF
Dimensión	Factor 1: Información de unidades municipales y funcionarios	Factor 2: Integración	Factor 3: Transparencia	Factor 4: Información Educacional y de Salud	Factor 5: Ley de Lobby	Factor 6: Concejo Comunal de Organizaciones de la Sociedad Civil (COSOC)	Factor 7: Beneficios, Deberes y Pagos	Factor 8: Contenido Informativo	Factor 9: Proyectos Comunales	Factor 10: Tramites Online	Factor 11: Valores	Factor 12: Consultas	Factor 13: Orientación	Factor 14: Medio Ambiente	Factor 15: Seguridad y Confiabilidad	Puntaje CF Total
Comuna
Isla de Maipo	4.65019	1.90577	4.5646	1.4888	3.52533	2.54029	0.795784	0	0	1.12509	0	0.49868	1.23986	0.825156	0	23.1595
Algarrobo	8.25417	4.17856	7.02467	4.8253	5.3497	2.20199	0.503157	0	0	0.50193	1.84112	0	0	1.31597	0.303281	36.2998
Alhué	8.78631	0	7.02467	0	5.3497	0	0.503157	0.514627	0	0	0	0	0.638746	0	0	22.8172
Alto Biobío	0.532139	0	7.02467	0	5.3497	0	0	0	0	0	0	0	0	0	0	12.9065
Alto Del Carmen	8.78631	1.42157	7.02467	1.47647	5.3497	0	0	0	0	0	0	0	0	0	0	24.0587
Alto Hospicio	0	0	0	0	0	0.83432	0.427861	0	0	0	0	0	0	0	0	1.26218
Ancud	8.78631	7.30076	7.02467	0	5.3497	0.500356	1.68277	0.514627	0	0	0	0	0	2.14113	0	33.3003
Andacollo	0.532139	0	6.4116	0	5.3497	0.500356	0	0	0	0	0.897314	0	0	0.761952	0	14.4531
Angol	7.23576	1.50795	7.02467	3.67865	5.3497	3.85948	0.503157	0	0.522249	0.671912	1.84112	0	0	2.14113	0	34.3358
Antofagasta	9.278	7.30076	7.02467	1.87645	5.3497	4.6938	1.60001	0	0	3.16457	1.84112	0	0	1.58711	0.303281	44.0195
Antuco	8.78631	0	7.02467	0	5.3497	4.6938	1.68277	0.514627	0	0	0	0	0	0.761952	0	28.8138
Arauco	8.78631	0	7.02467	0	5.3497	4.6938	0.503157	0.514627	0	0	2.278	0	0	0	0	29.1503
Arica	8.48963	0	5.24614	1.33435	5.3497	1.33116	1.59994	0	0	0	2.278	0	0	0.761952	0.303281	26.6942
Aysén	8.78631	5.7504	7.02467	2.0926	4.62485	3.85948	0.503157	2.03741	0.522249	0.50193	1.84112	0	0	0	0	37.5442
Buin	8.78631	0	7.02467	0	5.3497	0.500356	0.503157	0.514627	0	0	0	0	0	0	0	22.6788
Bulnes	8.02413	0	7.02467	3.03261	5.3497	0	0	0	0	0	0	0	0	0	0	23.4311
Cabildo	7.23024	3.50295	7.02467	4.60373	5.3497	1.32705	0	2.03741	0.522249	2.7114	0	0.524363	0	1.31597	0	36.1497
Cabo De Hornos	7.24909	1.96143	7.02467	1.33435	4.62485	2.15762	0	1.24449	0.522249	0	0	0	0	0.554019	0	26.6728
Cabrero	8.78631	0	7.02467	0	5.3497	0	1.68277	0.514627	0	0	0	0	0	1.31597	0	24.674
Calama	1.29432	0	3.67076	0	0	0	0	0	0	2.00025	0	0	0.638746	0	0	7.60408
Calbuco	8.78631	0	7.02467	0	5.3497	0	1.68277	0.514627	0	0	0	0	0	2.14113	0	25.4992
Caldera	0.532139	0	7.02467	0	0.919636	4.6938	0.427861	0	0	1.54707	0	0	0	0	0	15.1452
Calera	6.25583	1.15208	7.02467	1.33435	4.62485	3.863	0.503157	0	0.522249	0	0	0	0.601118	1.58711	0	27.4684
Calera De Tango	0	0	0	0.797898	0	0	0	0	0	0	0	0	0	0	0	0.797898
Calle Larga	1.65766	1.92539	7.02467	5.57125	3.74812	0.500356	0.503157	2.03741	0	1.17384	0	0	1.23986	0.554019	0	25.9357
Camarones	1.41883	0.4842	7.02467	2.84728	5.3497	2.16548	0.503157	0	0	1.54707	2.278	0	0	0	0	23.6184
Camiña	6.48691	0	4.78695	0	0	0	0	0	0	0	0	0	0	0	0	11.2739
Canela	2.9277	0	7.02467	0	0	0	0.503157	0	0	0	0	0	0	0	0	10.4555
Cañete	8.78631	0	7.02467	5.82794	5.3497	0.500356	0	0.514627	0	0	0	0	0	2.14113	0	30.1447
Carahue	6.39918	2.71459	7.02467	0.643455	0	2.52833	0	2.03741	0	0	0	0	1.23986	2.14113	0	24.7286
Cartagena	8.78631	0.4842	7.02467	1.44135	4.62485	2.15785	0.931018	2.03741	0.522249	0	1.84112	0.524363	0	0.761952	0.303281	31.4406
Casablanca	8.78631	5.87972	7.02467	5.82794	5.3497	2.20984	1.01385	0.514627	1.2528	1.17384	0	0	0	2.14113	0.303281	41.4777
Castro	8.78631	0	7.02467	0	5.3497	0	1.01385	0.514627	0	0	0	0	0	0	0	22.6891
Catemu	9.278	0	7.02467	1.51969	4.62485	0.500356	0	1.24449	0	0	0	0	0	0	0	24.1921
Cauquenes	0.532139	0	7.02467	0	5.3497	0	0.503157	0.514627	0	0	1.84112	0	0	0.761952	0	16.5274
Cerrillos	9.278	0	7.02467	0	5.3497	4.6938	1.68277	0.514627	0	0.453176	1.84112	0	0	0	0	30.8379
Cerro Navia	8.78631	0	7.02467	0	5.3497	0.500356	0.503157	0.514627	0	0	0	0	0	0	0	22.6788
Chaitén	0.532139	0	7.02467	0	5.3497	0	0.503157	0.514627	0	0	0	0	0	0	0	13.9243
Chanco	8.78631	0	7.02467	0	5.3497	0	0	0.514627	0	0	0	0	0	0.761952	0	22.4373
Chañaral	8.78631	0	7.02467	0	0	0.500356	0.503157	0	0	0.671912	0	0	0.638746	0.761952	0	18.8871
Chépica	8.02221	0	7.02467	4.23307	5.3497	0.500356	0	0.514627	0	0.453176	0	0	0	0.761952	0	26.8598
Chiguayante	8.78631	7.30076	7.02467	0	5.3497	0.500356	1.44171	0.514627	0	0.671912	1.84112	0	0.638746	2.14113	0	36.211
Chile Chico	0.532139	0	7.02467	0	5.3497	0	0.503157	0.514627	0	0	0	0	0	0	0	13.9243
Chillán	8.78631	7.30076	7.02467	0	5.3497	0	0.503157	0	0	0	0	0	0	2.14113	0	31.1057
Chillán Viejo	0.532139	0	6.4116	0	0	0	0	0	0	0	0	0	0	0	0	6.94374
Chimbarongo	8.78631	3.42824	7.02467	0.761444	5.3497	0	0	0.514627	0	0	0	0	0	0.761952	0	26.6269
Cholchol	6.36647	1.99215	7.02467	1.33435	4.62485	3.02868	0	2.03741	0.522249	0.671912	0	0	0.638746	0.761952	0	29.0034
Chonchi	8.78631	0	7.02467	0	5.3497	0	1.01385	0.514627	0	0	0	0	0	0	0	22.6891
Cisnes	1.32051	1.45708	7.02467	0.643455	4.62485	1.33116	0	1.30754	0.522249	1.37709	0	0	0	2.14113	0	21.7497
Cobquecura	0.532139	0.4842	7.02467	2.1996	0	4.6938	0	0	0	0	0	0	0	0.554019	0	15.4884
Cochamó	8.78631	0	7.02467	0	5.3497	0	1.01385	0.514627	0	0	0	0	0	0	0	22.6891
Cochrane	5.61624	0	6.4116	0.643455	3.74812	2.15762	0	2.03741	0.522249	0.671912	0	0.49868	0.638746	0	0	22.946
Codegua	8.78631	0	7.02467	0.797898	5.3497	0.500356	1.01385	0.514627	0	0.662395	0	0	0	0	0.303281	24.9531
Coelemu	0.532139	0	7.02467	0	0	0	0.503157	0	0	0	0	0	0	0	0	8.05996
Coihueco	0.532139	0	7.02467	0	0	0	0.503157	0	0	0	0	0	0	1.58711	0	9.64707
Coinco	8.78631	0	7.02467	2.86268	5.3497	0.500356	4.28033	0.514627	0	1.83624	0	0	0.638746	0	0	31.7937
Colbún	9.278	0	7.02467	2.31341	5.3497	0.500356	0	0	0	0	0	0	0	1.31597	0	25.7821
Colchane	8.78631	0	7.02467	0	0	0	0	0	0	0.671912	0	0	0	0	0	16.4829
Colina	8.78631	0	7.02467	4.36955	5.3497	0	3.85247	0.514627	0	0.671912	0	0	0	0.554019	0	31.1233
Collipulli	8.78631	2.82056	7.02467	1.51969	4.62485	2.15785	0	1.24449	0.522249	0.671912	1.84112	0	0	0	0.303281	31.517
Coltauco	8.78631	0	7.02467	0	5.3497	0	0.503157	0.514627	0	0	0	0.49868	0	0	0	22.6771
Combarbalá	0.532139	0	7.02467	0	5.3497	0	0.931018	0	0	0	0	0	0	0	0	13.8375
Concepción	8.78631	0	7.02467	0	5.3497	0.500356	1.68277	0.514627	0	1.12509	1.84112	0	0	0.761952	0	27.5866
Conchalí	8.02413	0	7.02467	1.51969	5.3497	0.500356	0.503157	0.514627	0	0	0	0	0	0	0.775875	24.2122
Concón	6.64208	4.36582	4.47764	4.93969	5.3497	0.826696	0	2.03741	0	0.50193	1.84112	0	0.638746	0	0.303281	31.9241
Constitución	0	0	7.02467	0	5.3497	0	0.503157	0	0	0	0	0	0	0	0	12.8775
Contulmo	5.51941	0	7.02467	0	5.3497	0	0	0.514627	0	0	0	0	0	0	0	18.4084
Copiapó	0	0.4842	6.4116	0	5.3497	0.500356	0.503157	0	0	0	0	0	0	0.761952	0	14.011
Coquimbo	8.78631	0	7.02467	2.62912	5.3497	0.500356	0.503157	0	0	0.671912	1.84112	0	0	0	0	27.3063
Coronel	8.78631	0	7.02467	0	5.3497	0.500356	1.01385	0.514627	0	0.662395	0	0	0	1.58711	0	25.439
Corral	4.85148	0	0	2.85404	5.3497	0.500356	0	0	0	0	0	0	0.638746	0	0	14.1943
Coyhaique	9.278	4.34898	7.02467	2.62669	4.62485	2.98432	0.503157	2.03741	0	0.671912	0.943807	0	0	0	0	35.0438
Cunco	9.278	5.18906	7.02467	1.55873	3.74812	0.500356	0.503157	1.24449	0	0.50193	1.84112	0	0.638746	0.761952	0.303281	33.0936
Curacautín	8.78631	4.08106	6.20689	3.38814	3.74812	2.15762	0.503157	1.24449	0.522249	0	1.84112	0	0	1.31597	0	33.7951
Curacaví	8.78631	0	7.02467	0	5.3497	4.6938	0.503157	0.514627	0	0	0	0	0	0	0	26.8723
Curaco De Vélez	4.18814	0.4842	7.02467	0	5.3497	0	1.01385	0.514627	0	0	0	0	0	2.14113	0	20.7163
Curanilahue	8.78631	7.30076	7.02467	6.93454	5.3497	0.500356	0	0.514627	0	0	1.84112	0	0	2.14113	0	40.3932
Curarrehue	6.9786	0.754256	7.02467	2.32017	4.62485	2.15352	0	2.03741	0	0	0	0	0.638746	0	0	26.5322
Curepto	8.78631	0	2.33001	0	5.3497	0	0.503157	0	0	0	0	0	0	1.58711	0	18.5563
Curicó	8.78631	0	7.02467	3.43518	5.3497	0.500356	2.11063	0.514627	0	0	1.84112	0	0	0.761952	0	30.3245
Dalcahue	8.78631	0	7.02467	0	5.3497	0.500356	1.01385	0.514627	0	0	0	0	0	0	0	23.1895
Diego De Almagro	8.78631	1.42157	7.02467	1.55934	5.3497	0	0.427861	0	0	0.671912	0	0	0	0	0	25.2414
Doñihue	8.78631	0	7.02467	0	5.3497	0	1.01385	0.514627	0	0	0	0	0	0.761952	0	23.4511
El Bosque	9.278	0	7.02467	3.65452	5.3497	0.500356	0.503157	0.514627	0	0	1.84112	0	0	2.14113	0	30.8073
El Carmen	0.532139	0.4842	7.02467	0	5.3497	0	1.59994	0	0	1.12509	1.84112	0	0	2.14113	0	20.098
El Monte	8.78631	0	7.02467	1.51551	5.3497	0.500356	0.503157	0.514627	0	0	0	0	0	1.31597	0	25.5103
El Quisco	8.78631	5.65862	7.02467	6.15987	4.62485	3.85948	0.503157	2.03741	0	0.671912	1.84112	0.49868	1.23986	1.31597	0.303281	44.5252
El Tabo	7.99794	5.0109	7.02467	2.16314	3.74812	0.500356	1.59994	2.03741	0	0	0	0	0	0.761952	0.303281	31.1477
Empedrado	8.78631	0	7.02467	0	0	0	0	0	0	0	1.84112	0	0	1.58711	0	19.2392
Ercilla	5.60022	1.99215	7.02467	2.31759	4.62485	2.15762	0	2.03741	0.730547	0	1.84112	0	0.638746	0	0	28.9649
Estación Central	9.278	0	7.02467	2.77468	5.3497	0.500356	3.85247	0.514627	0	0.453176	0	0	0	0.554019	0	30.3017
Florida	8.78631	0	7.02467	0	5.3497	0.500356	1.68277	0.514627	0	0	1.84112	0	0	1.58711	0	27.2867
Freire	6.38678	0.4842	7.02467	4.11027	4.62485	2.20199	0.503157	0.792916	0	0	1.84112	0	0.638746	1.31597	0	29.9247
Freirina	0	0	7.02467	0	5.3497	0	0	0	0	0.671912	0	0	0	0	0	13.0463
Fresia	8.78631	0	7.02467	0	5.3497	4.6938	1.01385	0.514627	0	0	1.84112	0	0	0	0	29.2241
Frutillar	8.78631	0.4842	7.02467	2.96527	5.3497	0.500356	1.01385	0.514627	0	0	0	0	0	2.14113	0	28.7801
Futaleufú	8.78631	7.30076	7.02467	5.82794	5.3497	4.6938	1.01385	0.514627	0	0	0	0	0	0	1.60911	42.1208
Futrono	8.02221	0	7.02467	0	5.3497	4.6938	1.17208	0.514627	0	0	0	0	0	2.14113	0	28.9182
Galvarino	6.25558	2.66003	7.02467	0.643455	4.62485	2.15352	0	2.03741	0.522249	0	0	0	0	0.554019	0	26.4758
General Lagos	0.532139	0	3.14779	0	5.3497	0.500356	0.427861	0	0	0	0.436874	0	0	0	0	10.3947
Gorbea	6.34164	5.0109	7.02467	5.70154	4.62485	3.02868	0.503157	2.03741	0.522249	0	0	0	0.638746	1.31597	0.303281	37.0531
Graneros	8.78631	0	7.02467	0	5.3497	0	0.503157	0.514627	0	0	1.84112	0	0	0	0	24.0196
Guaitecas	7.14389	3.3268	7.02467	2.0926	3.70521	2.15785	0	2.03741	0	0	0	0	0.638746	1.31597	0	29.4431
Hijuelas	8.51582	1.50795	6.4116	6.15987	4.62485	0.500356	0	1.24449	0	0.671912	0	0	1.23986	0	0.303281	31.18
Hualaihué	8.01318	0	7.02467	0	5.3497	0	1.01385	0.514627	0	0	0	0	0	2.14113	0	24.0571
Hualañé	8.78631	0	7.02467	0	5.3497	0	0.510689	0.514627	0	0	0	0	0	0	0	22.186
Hualpén	8.25417	0	7.02467	7.39287	5.3497	0	1.17208	0.514627	0	0	0	0	0	1.58711	0	31.2952
Hualqui	8.78631	6.81656	7.02467	0	5.3497	0.500356	1.01385	0.514627	0	1.62702	0	0	0	0	0	31.6331
Huara	0.532139	0	7.02467	0	0	0	0.427861	0	0	1.33431	0	0	0	0	0	9.31897
Huasco	0.532139	1.42157	7.02467	0	5.3497	0.500356	0	0	0	0.671912	0	0	0	1.31597	0	16.8163
Huechuraba	8.78631	0	7.02467	6.93454	5.3497	4.6938	1.44171	0.514627	0	0	0.897314	0	0	2.14113	0	37.7838
Illapel	0.532139	0	7.02467	0	5.3497	0	0	0	0	0	1.84112	0	0	0	0	14.7476
Independencia	8.78631	0	7.02467	5.68542	5.3497	0.500356	1.01385	0.514627	0	0	0	0	0	2.14113	0	31.016
Iquique	8.78631	5.50096	4.98	2.37243	5.3497	2.99194	0.931018	0	0	2.20947	1.84112	0	0	0	0.775875	35.7388
Juan Fernández	6.18472	0.667876	4.75699	4.38692	3.74812	0	0	2.03741	0	0	1.84112	0.524363	0	1.58711	0	25.7346
La Cisterna	8.78631	7.30076	7.02467	6.40044	5.3497	0.500356	1.59994	0.514627	0	0	0	0	0	1.31597	0.775875	39.5686
La Cruz	6.28562	1.99215	6.4116	6.2017	5.3497	2.98432	1.37392	2.03741	0.522249	2.049	1.84112	0	0	0.761952	0.303281	38.114
La Estrella	8.78631	0	7.02467	0	5.3497	0.500356	0.503157	0.514627	0	0	1.84112	0	0	2.14113	0	26.6611
La Florida	8.78631	7.30076	7.02467	0	5.3497	0.500356	3.14755	0.514627	0	0	0	0	0	1.31597	0	33.9399
La Granja	8.78631	0	7.02467	2.96527	5.3497	0	1.68277	0.514627	0	0	0	0	0	1.31597	0	27.6393
La Higuera	0	0	7.02467	0.797898	5.3497	0	0.931018	0	0	0	0	0	0	0	0	14.1033
La Ligua	8.78631	2.55349	7.02467	2.59317	4.62485	2.15762	0.503157	1.24449	0.522249	2.03949	0	0	0	0.554019	1.13651	33.74
La Pintana	9.278	0.4842	7.02467	3.62835	5.3497	0.500356	1.01385	0.514627	0	0	0	0	0	0	0.303281	28.097
La Reina	8.78631	3.42824	7.02467	0	5.3497	4.6938	3.85247	0.514627	0	0	0	0	0	1.31597	0.303281	35.2691
La Serena	8.25417	0	7.02467	0	5.3497	0	0.503157	0	0	0	1.84112	0	0	2.14113	0	25.1139
La Unión	8.78631	0.4842	7.02467	5.82794	5.3497	0.500356	1.01385	0.514627	0	0	1.84112	0	0	2.14113	0	33.4839
Lago Ranco	8.78631	0	7.02467	0	5.3497	0	0.503157	0.514627	0	0	0	0	0	0	0	22.1785
Lago Verde	7.74079	0	4.72711	2.86268	2.61098	0.500356	0	0	0.522249	1.33431	0	0	0	2.14113	0.303281	22.7429
Laguna Blanca	5.61762	0	7.02467	2.16314	2.82848	2.15762	1.17962	2.03741	0	0	0	0	0	0	0	23.0086
Laja	8.25417	0	7.02467	2.86268	5.3497	0	1.68277	0.514627	0	0	0	0	0	0.761952	0	26.4506
Lampa	0.532139	0	7.02467	0	5.3497	0.500356	0.503157	0.514627	0	0	0	0	0	0	0	14.4246
Lanco	0.532139	0	7.02467	0	5.3497	0	1.68277	0.514627	0	0	0	0	0	2.14113	0	17.245
Las Cabras	8.78631	0	7.02467	0	0	0	0	0	0	0.662395	0	0	0	0	0	16.4734
Las Condes	8.78631	7.30076	7.02467	7.39287	5.3497	4.6938	3.57541	0.514627	0	1.37709	1.84112	0	0	2.14113	0.775875	50.7733
Lautaro	8.78631	0.667876	7.02467	3.65452	4.62485	1.32705	2.11063	1.24449	0	1.17384	0	0	0.638746	1.31597	0	32.569
Lebu	8.78631	0	7.02467	0	5.3497	0	0.668927	0.514627	0	0	0	0	0	0.761952	0	23.1062
Licantén	8.78631	0	7.02467	7.85463	5.3497	0.500356	0.668927	0	0	0	1.84112	0	0	0	0	32.0257
Limache	7.12313	5.0109	7.02467	3.88612	4.62485	2.15785	0.503157	2.03741	0.522249	0.671912	0	0.49868	0	0.554019	0.303281	34.9182
Linares	8.78631	0	7.02467	4.29984	5.3497	0	0.503157	0.514627	0	0	0	0	0	0	0	26.4783
Litueche	8.78631	0	7.02467	5.03005	5.3497	4.6938	0.503157	0.514627	0	0	0	0	0	2.14113	0	34.0434
Llaillay	2.08269	0.754256	7.02467	2.28928	3.74812	2.15762	0.503157	0.514627	0	0.50193	0	0	0	1.31597	0	20.8923
Llanquihue	8.78631	0	7.02467	0	5.3497	0.500356	1.01385	0.514627	0	0	0	0	0	0	0	23.1895
Lo Barnechea	9.278	7.30076	7.02467	7.39287	5.3497	4.6938	4.71053	1.30754	1.96594	2.28941	0	0	0	2.14113	0.775875	54.2302
Lo Espejo	8.78631	0	7.02467	3.7261	5.3497	0	1.68277	0.514627	0	0	1.84112	0	0	0	0	28.9253
Lo Prado	8.78631	0	7.02467	0	5.3497	4.6938	1.17215	0.514627	0	0	0	0	0	0	0.303281	27.8445
Lolol	8.78631	0	7.02467	5.41903	5.3497	0	0	0.514627	0	0	1.84112	0	0	0	0	28.9354
Loncoche	8.02221	3.42824	7.02467	3.36783	3.74812	3.03631	0.503157	2.03741	1.23539	0	0	0	0.638746	1.31597	0	34.358
Longaví	0	0	7.02467	1.33435	0	0	0	0	0	0	0	0	0	0	0	8.35902
Lonquimay	7.98368	3.43334	7.02467	3.42196	4.62485	2.98432	0.427861	2.03741	1.23539	0	0	0	0.638746	0	0	33.8122
Los Álamos	8.78631	0	7.02467	0	5.3497	2.49182	0	0.514627	0	0.50193	1.84112	0	0	0.761952	0	27.2721
Los Andes	8.78631	1.40142	7.02467	6.73237	4.62485	2.15785	1.01385	0	0	0.671912	0	0	0.638746	0.554019	0.303281	33.9093
Los Ángeles	8.78631	2.94404	7.02467	0	5.3497	4.6938	0	0.514627	0	0	1.84112	0	0	0.761952	0	31.9162
Los Lagos	8.78631	0	7.02467	0	5.3497	0	1.01385	0.514627	0	0	0	0	0	2.14113	0	24.8303
Los Muermos	8.78631	0	7.02467	5.82794	5.3497	0.500356	1.01385	0.514627	0	0	1.84112	0	0	2.14113	0	32.9997
Los Sauces	7.75173	3.46938	7.02467	2.85404	4.62485	2.15762	0.503157	2.03741	0.522249	0	0	0	1.23986	1.31597	0	33.5009
Los Vilos	0	0	7.02467	0	5.3497	0	0	0	0	0	0	0	0	1.37918	0	13.7535
Lota	8.78631	0	7.02467	0	5.3497	0	1.01385	0.514627	0	0	0	0	0	0	0	22.6891
Lumaco	7.24909	4.18139	7.02467	2.85404	2.76285	3.85948	0.427861	1.24449	0.522249	0	0	0	0	0	0	30.1261
Machalí	8.78631	6.81656	7.02467	5.82794	0	4.6938	1.68277	0	0	2.03949	1.84112	0	0	0	0.303281	39.0159
Macul	8.78631	0	7.02467	0	5.3497	4.6938	1.68277	0.514627	0	0	0	0	0	0.761952	0	28.8138
Máfil	0.532139	0	7.02467	0	5.3497	0	0.503157	0.514627	0	0	0	0	0	0	0	13.9243
Maipú	8.78631	3.42824	7.02467	0	5.3497	0.500356	1.68277	0.514627	0	2.7114	1.84112	0	0	0.761952	0.303281	32.9044
Malloa	8.78631	0	7.02467	5.82794	5.3497	0.500356	1.01385	0	0	0	0	0	0	0	0	28.5028
Marchihue	8.78631	0	7.02467	0	5.3497	0.500356	0.503157	0.514627	0	0	0	0	0	0	0	22.6788
María Elena	0.532139	0	0.613066	0.690897	5.3497	0	0.427861	0	0	0	1.84112	0	0.638746	0	0	10.0935
María Pinto	0.532139	0	7.02467	0	5.3497	4.6938	0.503157	0.514627	0	0	1.84112	0	0	0	0	20.4592
Mariquina	9.278	0	7.02467	2.16737	0	0	1.01385	0	0	0	0	0	0	2.14113	0	21.625
Maule	8.78631	0	6.4116	0	5.3497	0	0.503157	0	1.96594	0	0	0	0	0	0	23.0167
Maullín	8.78631	0	7.02467	0	5.3497	0	1.01385	0.514627	0	0	0	0	0	0	0	22.6891
Mejillones	8.78631	0.4842	7.02467	0	0	0.500356	0.931018	0.514627	0	1.54707	0	0	0	0.825156	0	20.6134
Melipeuco	3.79352	4.07596	7.02467	1.33435	4.62485	2.15352	0	2.03741	0.522249	1.54707	1.84112	0	0.638746	0.554019	0.833233	30.9807
Melipilla	8.78631	0	7.02467	0	5.3497	0.500356	1.68277	0.514627	0	0.50193	0	0	0	1.31597	0	25.6763
Molina	8.78631	0	7.02467	0	5.3497	0.500356	0.503157	0.514627	0	0	0	0	0	0.761952	0	23.4408
Monte Patria	0.532139	0	7.02467	0	5.3497	0	0.427861	0	0	0	1.84112	0	0	0	0	15.1755
Mostazal	8.78631	7.30076	7.02467	5.16745	5.3497	0	1.01385	0.514627	0	0	0	0	0	0.554019	1.60911	37.3205
Mulchén	8.78631	0	7.02467	0	5.3497	0.500356	1.68277	0.514627	0	0	1.84112	0	0	0.761952	0	26.4615
Nacimiento	8.78631	0	7.02467	0	5.3497	0.500356	1.68277	0.514627	0	0	1.84112	0	0	0	0	25.6995
Nancagua	8.02413	7.30076	7.02467	0	5.3497	0	0	0.514627	0	0	0	0	0	0	0	28.2139
Natales	8.78631	0.4842	7.02467	0	5.3497	0	0.503157	0	0	0	0	0	0	2.14113	0	24.2892
Navidad	8.78631	0	7.02467	0	5.3497	0.500356	0	0.514627	0	0	0	0	0	0.825156	0	23.0008
Negrete	8.78631	0	7.02467	0	5.3497	0	0.503157	0.514627	0	0	0	0	0	0.761952	0	22.9404
Ninhue	0	0	7.02467	0	0	0	0	0	0	0	0	0	0	0	0	7.02467
Nogales	3.86026	0	7.02467	2.20218	4.62485	2.15762	0	2.03741	0	0	1.84112	0	0.638746	0.554019	0	24.9409
Nueva Imperial	7.26003	4.24269	7.02467	2.81082	4.62485	2.15762	0.503157	2.03741	0	0.671912	1.84112	0	0.638746	0.554019	0.303281	34.6703
Ñiquén	0.532139	0	2.94308	0	0	4.19345	0	0	0	0	0.943807	0	0	0	0	8.61247
Ñuñoa	8.78631	0	7.02467	0	0	0.500356	3.14755	0.514627	0	0	0	0	0	0	0	19.9735
O'Higgins	5.61762	0	6.20689	3.99673	4.62485	2.15762	0	1.24449	0	0.671912	0	0	0	1.31597	0	25.8361
Olivar	8.78631	0	7.02467	0	5.3497	0.500356	0.503157	0.514627	0	0	0	0	0.638746	1.31597	0	24.6335
Ollagüe	0.532139	0	0	0	0	0	0.427861	0	0	0	1.84112	0	0	0	0	2.80112
Olmué	7.23024	5.18906	7.02467	5.46189	4.62485	0.826696	0	1.24449	0.522249	0	0.943807	0	1.23986	0	0	34.3078
Osorno	9.278	0	7.02467	0.797898	5.3497	4.6938	1.01385	0.514627	0	1.16432	1.84112	0	0	0.554019	0	32.232
Ovalle	8.78631	0	7.02467	0	5.3497	0.500356	0.503157	0	0	2.66264	1.84112	0	0	0.761952	0	27.4299
Padre Hurtado	7.99794	1.90577	4.47764	1.33435	5.3497	1.33116	0.427861	1.24449	0	0.671912	0	0	0.638746	0	0	25.3796
Padre Las Casas	8.78631	5.18906	7.02467	3.8331	4.62485	3.02868	1.68277	2.03741	0.522249	1.17384	1.84112	0	0.638746	1.31597	0.303281	42.0021
Paiguano	0	0	7.02467	0	5.3497	0	0	0	0	0	0	0	0	0.761952	0	13.1363
Paillaco	8.78631	0	7.02467	2.96527	5.3497	0.500356	0.503157	0.514627	0	0	1.84112	0	0	2.14113	0	29.6263
Paine	8.78631	0.4842	7.02467	4.45242	5.3497	4.6938	0.503157	0.514627	0	0	1.84112	0	0	1.31597	0.775875	35.7418
Palena	8.78631	0	7.02467	0	5.3497	0.500356	0.503157	0.514627	0	0	0	0	0	2.14113	0	24.8199
Palmilla	8.78631	0	6.4116	0	5.3497	0	0	0.514627	0	0	0	0	0	1.58711	0	22.6493
Panguipulli	8.25417	0	7.02467	0	5.3497	0	1.01385	0	0	0	0	0	0	2.14113	0.775875	24.5594
Panquehue	7.26003	3.3268	7.02467	3.84647	4.62485	3.03279	0	2.03741	0.522249	0	1.84112	0	0.638746	0.554019	0	34.7091
Papudo	6.40109	3.58877	7.02467	6.62163	3.74812	1.32705	0	1.24449	0.522249	0	1.84112	0	0	1.31597	0	33.6352
Paredones	8.78631	0	7.02467	2.15896	5.3497	0.500356	0	0.514627	0	0	1.84112	0	0	1.58711	0.303281	28.0661
Parral	0.532139	2.18978	7.02467	0	5.3497	4.6938	0.503157	0.514627	0	0	0	0	0	0.761952	0	21.5698
Pedro Aguirre Cerda	8.78631	0	7.02467	6.40044	5.3497	0.500356	1.01385	0.514627	0	0	0	0	0	0	0	29.5899
Pelarco	8.78631	0	7.02467	0	5.3497	0	0.503157	0	0	0.453176	0	0	0.638746	1.58711	0	24.3429
Pelluhue	8.78631	0	7.02467	0	5.3497	0	0.503157	0.514627	0	0	0	0	0	0.761952	0	22.9404
Pemuco	0.532139	0.4842	7.02467	0	5.3497	0	0.503157	0	0	1.99073	0	0	0	2.14113	0	18.0257
Pencahue	8.78631	0	7.02467	0	0	0	0	0	0	0	0	0	0	0	0	15.811
Penco	8.78631	0	7.02467	0	5.3497	0.500356	1.01385	0.514627	0	0	0	0	0	0	0	23.1895
Peñaflor	9.278	3.3268	6.46869	7.85463	5.3497	2.99194	0.503157	1.24449	1.96594	0.671912	2.278	0	0	1.37918	0.303281	43.6157
Peñalolén	8.78631	6.81656	7.02467	6.40044	5.3497	0.500356	1.44171	0.514627	0	0	1.84112	0	0	0	0	38.6755
Peralillo	8.78631	0	7.02467	0	0	0	0.427861	0	0	0	0	0	0	0.761952	0	17.0008
Perquenco	6.36431	2.66003	7.02467	2.85404	3.74812	2.20199	0.427861	2.03741	0.522249	0	1.84112	0	0	1.31597	0.303281	31.3011
Petorca	1.32051	4.34303	7.02467	0.761444	4.62485	0.500356	0.503157	1.24449	0.522249	0.671912	0	0	0	0	0.303281	21.8199
Peumo	8.78631	0	7.02467	0	0	0.500356	0.503157	0.514627	0	0	0	0	0	0	0	17.3291
Pica	8.78631	0.4842	6.4116	0.715025	5.3497	0	0.427861	0	0	0.453176	0	0	0	0.761952	0	23.3898
Pichidegua	8.78631	0	7.02467	1.51551	0	0.500356	0.503157	0	0	0	0	0	0	1.31597	0	19.646
Pichilemu	8.78631	0	7.02467	0	5.3497	0	0.503157	0.514627	0	0	0	0	0	1.31597	0	23.4944
Pinto	9.278	0	7.02467	0	5.3497	0	0	0	0	0.671912	1.84112	0	0	2.14113	0	26.3065
Pirque	0.532139	0	7.02467	3.65194	5.3497	0.500356	1.01385	0.514627	0	0	0	0	0	0	0	18.5873
Pitrufquén	7.23385	3.41318	7.02467	3.77857	5.3497	2.98432	0.503157	2.03741	0.522249	0	0	0	0.638746	1.31597	0.303281	35.1051
Placilla	8.78631	0	6.4116	0	5.3497	0	0	0.514627	0	0	0	0	0	0	0	21.0622
Portezuelo	8.78631	7.30076	7.02467	0	0	0	0	0	0	0	0	0	0	0	0	23.1117
Porvenir	9.278	0	7.02467	0	5.3497	0	0.503157	0.514627	0	0	1.84112	0	0	0	0	24.5113
Pozo Almonte	0	0	4.98	0	5.3497	0.83432	0.503157	0	0	0	0	0	0	0.761952	0	12.4291
Primavera	0.532139	0	7.02467	5.82794	5.3497	0	0.503157	0.514627	0	0	0	0	0	1.37918	0	21.1314
Providencia	9.278	7.30076	7.02467	7.39287	0	4.6938	4.28033	0.514627	0	0	0	0	0	2.14113	0.775875	43.4021
Puchuncaví	8.02221	4.26548	2.26768	2.66635	4.62485	0.500356	0.931018	2.03741	0	1.17384	0	0	0.638746	1.31597	0	28.4439
Pucón	8.78631	4.89041	7.02467	5.01065	4.62485	3.85948	0	2.03741	0.522249	0.671912	0	0	0.638746	0.761952	0.303281	39.1319
Pudahuel	8.78631	0	7.02467	1.47647	5.3497	0	1.68277	0.514627	0	0.50193	0	0	0	0	0	25.3365
Puente Alto	8.78631	0	7.02467	5.16745	5.3497	0	2.67286	0.514627	0	0	1.84112	0	0	0	0	31.3567
Puerto Montt	8.78631	0	7.02467	6.82037	5.3497	0.500356	2.11063	0.514627	0	0.662395	0	0	0	2.14113	0	33.9102
Puerto Octay	0.532139	0	7.02467	0	5.3497	0	0	0.514627	0	0	0	0	0	0	0	13.4211
Puerto Varas	9.278	0	7.02467	0	5.3497	4.6938	1.68277	0.514627	0	0	0	0	0	0	0	28.5436
Pumanque	5.6246	0	6.4116	0	5.3497	0	0	0.514627	0	0	0	0	0	0	0	17.9005
Punitaqui	0.532139	0	7.02467	0	5.3497	4.6938	0.427861	0	0	0	0	0	0	1.58711	0	19.6153
Punta Arenas	8.78631	2.73474	7.02467	4.11286	4.62485	3.03279	1.87707	1.24449	0	2.049	0	0	0	0.761952	0.303281	36.552
Puqueldón	8.78631	0	7.02467	0	5.3497	0.500356	0.510689	0.514627	0	0	0	0	0	2.14113	0	24.8275
Purén	7.22833	2.77942	7.02467	1.51969	4.62485	3.85948	0	2.03741	0	0	0	0	0.601118	1.31597	0	30.9909
Purranque	8.78631	0	7.02467	2.85404	5.3497	4.19345	1.01385	0.514627	0	0	0	0	0	0	1.60911	31.3457
Putaendo	7.17422	4.24269	7.02467	4.90365	5.3497	0.826696	0	1.24449	0.522249	0.671912	0	0	0	0.554019	0	32.5143
Putre	3.87019	0.4842	5.66773	1.4888	2.61098	3.86734	0.427861	0	0	0.671912	0	0	0	0	0	19.089
Puyehue	8.78631	0	7.02467	3.65194	5.3497	0	1.17208	0.514627	0	0	0	0	0	0	0.472594	26.9719
Queilén	8.78631	0	7.02467	0	5.3497	0.500356	1.01385	0.514627	0	0	0	0	0	2.14113	1.60911	26.9397
Quellón	8.78631	0	7.02467	0	5.3497	0.500356	1.01385	0.514627	0	0	0	0	0	0	0	23.1895
Quemchi	8.78631	0.4842	7.02467	5.82794	5.3497	0.500356	1.01385	0.514627	0	0	0	0	0	0	0	29.5016
Quilaco	8.78631	0	7.02467	0	5.3497	0	0.503157	0.514627	0	0	0	0	0	0	0	22.1785
Quilicura	8.78631	7.30076	7.02467	7.85463	5.3497	0.500356	3.57541	1.24449	0	0	0	0	0	2.14113	0.775875	44.5533
Quilleco	0	0	7.02467	0	5.3497	0	0	0	0	0	1.84112	0	1.23986	0	0	15.4554
Quillón	0.532139	0	7.02467	5.06609	5.3497	0	0.503157	0	0	0	0	0	0	0	0	18.4757
Quillota	9.278	6.45473	7.02467	5.16745	4.62485	2.20222	4.28033	2.03741	0	0	0	0	0.601118	1.31597	0.303281	43.29
Quilpué	9.278	3.47064	7.02467	1.14923	4.62485	2.99194	2.11063	2.03741	0.522249	0	0	0	0.638746	1.31597	0.303281	35.4676
Quinchao	4.79546	0	7.02467	0	5.3497	0	1.01385	0.514627	0	0	0	0	0	0	0	18.6983
Quinta De Tilcoco	8.78631	0	7.02467	0	0	0.500356	0.931018	0	0	0	0	0	0	0	0	17.2423
Quinta Normal	8.78631	0.4842	7.02467	2.86268	0	4.6938	1.01385	0	0	0	0	0	0	0	0.303281	25.1688
Quintero	8.42809	0.4842	6.20689	0.690897	3.74812	2.20199	0	2.03741	0.522249	1.54707	0	0	0	1.31597	0.303281	27.4862
Quirihue	0.532139	0	7.02467	1.51969	5.3497	0	0	0	0	0.671912	0	0	0	1.58711	0	16.6852
Rancagua	8.78631	0	7.02467	0	5.3497	0.500356	2.11063	0.514627	0	3.16457	0	0	0	1.31597	0	28.7668
Ránquil	7.10573	0.76821	7.02467	3.55358	5.3497	4.6938	0.503157	0	0	2.00025	1.84112	0	0	2.14113	0.303281	35.2846
Rauco	8.78631	0	7.02467	0	5.3497	4.6938	0.931018	0	0	0	0	0	0	0	0	26.7855
Recoleta	8.78631	0	7.02467	3.43518	0	4.6938	1.68277	0	0	0	0	0	0.638746	0	0	26.2615
Renaico	7.26003	1.2379	6.46869	0	4.62485	2.98432	0	0.729866	0	0	0	0	0.638746	0	0	23.9444
Renca	8.78631	0	7.02467	5.82794	5.3497	0.500356	2.11063	0.514627	0	0	0	0	0	1.31597	0	31.4302
Rengo	9.278	0	7.02467	4.29984	5.3497	0	0.503157	0.514627	0	0	1.84112	0	0.638746	0	0	29.4499
Requínoa	0.532139	0	7.02467	0	0	0.500356	0.503157	0.514627	0	0	1.84112	0	0	0	0	10.9161
Retiro	8.78631	0	7.02467	0.800483	5.3497	0.500356	0	0.514627	0	0.453176	0	0	0.638746	0	0	24.0681
Rinconada	7.23024	5.65862	5.86011	2.52894	4.62485	3.85948	0	0	0	0	0	0	0	0	0.303281	30.0655
Río Bueno	8.78631	0	7.02467	0	5.3497	0.500356	1.68277	0.514627	0	0	0	0	0	0	0	23.8584
Río Claro	8.78631	0	7.02467	0	5.3497	0.500356	0	0.514627	0	0	0	0	0	0.761952	0	22.9376
Río Hurtado	0.532139	0	7.02467	0	0	0.500356	0.931018	0.514627	0	0	0	0	0	0	0	9.5028
Río Ibáñez	1.32051	1.96143	7.02467	1.33435	3.74812	2.15762	0.503157	1.24449	0.522249	0	0	0.49868	0	0	0	20.3153
Río Negro	8.78631	0	7.02467	0.715025	5.3497	0.500356	0.503157	0.514627	0	0	0.943807	0	0.638746	0	0	24.9764
Río Verde	5.08548	2.25054	7.02467	2.69724	4.62485	1.33116	0	2.03741	0	0	0	0	0	0	0	25.0513
Romeral	0	0	7.02467	0	5.3497	1.6575	0.503157	0.514627	0	0	0	0	0	0	0	15.0496
Saavedra	8.50488	1.58267	7.02467	1.47647	4.62485	2.15762	0	2.03741	0	0	0	0	0.638746	2.14113	0.303281	30.4917
Sagrada Familia	8.78631	0	7.02467	0	5.3497	0	0.503157	0.514627	0	0	0	0	0	0	0	22.1785
Salamanca	8.78631	0	7.02467	0.761444	5.3497	4.6938	0	0.514627	0	0.671912	0	0	0	0	0	27.8025
San Antonio	9.278	6.45473	7.02467	5.62578	4.62485	3.03302	1.68277	2.03741	1.2528	0.671912	1.84112	0	0	1.31597	0.303281	45.1463
San Bernardo	8.78631	0	7.02467	0	5.3497	4.6938	0.503157	0.514627	0	0	1.84112	0	0	0.554019	0	29.2674
San Carlos	8.78631	0	7.02467	0	0	0	0.503157	0	0	0	0	0	0	2.14113	0	18.4553
San Clemente	8.78631	0	7.02467	7.85463	5.3497	0	0.503157	0	0	0	1.84112	0	0.638746	2.14113	0	34.1394
San Esteban	7.26003	3.44729	7.02467	4.30825	4.62485	1.32682	0	1.24449	0.522249	1.78748	0.943807	0	0.638746	0.554019	0	33.6827
San Fabián	0.532139	0	7.02467	0	5.3497	0	0	0	0	0	0	0	0	1.58711	0	14.4936
San Felipe	8.78631	6.45473	7.02467	5.16745	4.62485	1.33116	1.68277	2.03741	0.522249	0.50193	0	0	0	1.37918	0	39.5127
San Fernando	8.78631	7.30076	7.02467	0.797898	5.3497	0.500356	0.503157	0.514627	0	0	0	0	0	2.14113	0	32.9186
San Gregorio	1.32051	2.94404	7.02467	2.0926	4.62485	2.15762	0	2.03741	0.522249	0	0	0	0.638746	0.554019	0	23.9167
San Ignacio	0.532139	0	7.02467	1.51292	5.3497	0	0.503157	0	0	1.83624	0	0	0.638746	0	0	17.3976
San Javier	8.78631	6.81656	7.02467	5.70954	5.3497	0.500356	0.503157	0.514627	0	0	1.84112	0	0	1.58711	0	38.6331
San Joaquín	8.78631	6.81656	7.02467	2.70146	5.3497	4.6938	1.68277	0.514627	0	0	0	0	0	0	0	37.5699
San José De Maipo	8.78631	0	7.02467	0.660497	5.3497	0.500356	2.11063	0.514627	0	1.16432	1.84112	0	0	1.31597	0	29.2682
San Juan De La Costa	9.278	3.42824	7.02467	5.16745	5.3497	0	0.931018	0.514627	0	0	0	0	0	0	0	31.6937
San Miguel	0.532139	0	7.02467	0	5.3497	0	1.68277	0.514627	0	0	0	0	0	0.554019	0	15.6579
San Nicolás	0.532139	0	7.02467	0	5.3497	0	0	0	0	0	0	0	0	1.58711	0	14.4936
San Pablo	8.02221	0	7.02467	0	5.3497	0	0.931018	0.514627	0	0	0	0	0	0	0	21.8422
San Pedro	8.78631	0	7.02467	3.55358	5.3497	0	0.503157	0.514627	0	0	0	0	0	0	0	25.732
San Pedro De Atacama	8.78631	0	7.02467	0.797898	5.3497	0	0.503157	0	0	1.54707	0.897314	0	0	0	0	24.9061
San Pedro De La Paz	8.78631	0	7.02467	3.4236	0.919636	0	2.11063	0.514627	0	0.671912	0	0	0	0	0	23.4514
San Rafael	8.78631	0	7.02467	0.797898	5.3497	0	0	0.514627	0	0	0	0	0	0	0	22.4732
San Ramón	8.78631	0	7.02467	5.82794	0	0.500356	0	0	0	0	0	0	0	0	0	22.1393
San Rosendo	0.532139	0.4842	7.02467	3.61736	0	0	0	0	0	0	0	0	0	2.14113	0	13.7995
San Vicente	9.278	0	7.02467	0	0	0.500356	0.503157	0	0	0	1.84112	0	0.638746	0	0	19.786
Santa Bárbara	9.278	2.67398	7.02467	2.31759	5.3497	4.6938	1.44171	0	0	0	1.84112	0	0	1.31597	0	35.9365
Santa Cruz	0	0	6.4116	0	0	0	0	0	0	0	0	0	0	0	0	6.4116
Santa Juana	8.78631	0	7.02467	0	0.919636	0	0	0.514627	0	0	1.84112	0	0	0.554019	0	19.6404
Santa María	5.59686	1.29356	6.4116	4.6866	4.62485	3.85948	0	2.03741	0	0.671912	0	0	0	1.31597	0.303281	30.8015
Santiago	8.78631	7.30076	7.02467	6.40044	5.3497	4.6938	3.57541	0.514627	0	3.16457	0	0	0	2.14113	0.303281	49.2547
Santo Domingo	8.78631	4.13616	7.02467	3.0352	3.52533	2.98432	0.503157	1.24449	0	1.83624	2.278	0	0	1.31597	0.303281	36.9731
Sierra Gorda	8.78631	0.4842	7.02467	4.98575	5.3497	0	0.503157	0	0	2.49266	0	0	0	0.825156	0	30.4516
Talagante	8.78631	3.87252	7.02467	2.89521	5.3497	0.500356	0.503157	0.514627	0	0	0	0	0	0	0	29.4465
Talca	3.70479	0	7.02467	3.96112	5.3497	0	0.931018	0	0	1.33431	0	0	0	0	0	22.3056
Talcahuano	8.78631	0.4842	7.02467	0.690897	5.3497	2.53243	0.503157	0.514627	0	0	0	0	0	1.31597	0	27.202
Taltal	0.532139	0	7.02467	0	0	0.500356	0	0	0	0	0	0	0.638746	0	0	8.69591
Temuco	9.278	5.0109	7.02467	6.2017	0	2.16548	1.68277	2.03741	0.522249	1.37709	0	0	0	1.31597	0.775875	37.3921
Teno	8.78631	0	7.02467	2.20218	5.3497	0	0.503157	0	0	0	0	0	0	2.14113	0	26.0071
Teodoro Schmidt	8.48963	5.03879	7.02467	2.85404	4.62485	2.15762	0	0	1.2528	0	1.84112	0	0.638746	1.31597	0.303281	35.5415
Tierra Amarilla	0.532139	0	7.02467	0	5.3497	0	0	0	0	0.671912	0	0	0.638746	0	0	14.2172
Tiltil	8.78631	3.87252	7.02467	0	5.3497	4.6938	0	0.514627	0	0	0	0	0	0	0	30.2416
Timaukel	0.532139	0	7.02467	0	5.3497	0	0.503157	0	0	0	0	0	0	0	0	13.4097
Tirúa	8.51582	0	6.4116	0	5.3497	0.500356	0	0.514627	0	0	0	0	0	0	0	21.2921
Tocopilla	0.532139	0	7.02467	0	5.3497	0	0	0	0	0	1.84112	0.49868	0	0.761952	0	16.0083
Toltén	0.788368	2.28126	7.02467	1.33435	4.62485	3.85948	0	2.03741	0.522249	0	0	0	0.638746	0.761952	0	23.8733
Tomé	8.78631	2.94404	7.02467	0	0	0	0.933356	2.03741	0	0	1.84112	0.524363	0	1.31597	0	25.4072
Torres Del Paine	8.02221	0	7.02467	0	5.3497	0	0.503157	0	0	0	0	0	0	2.14113	0	23.0409
Tortel	6.9786	2.03456	7.02467	0.758246	1.88613	1.33116	0.427861	2.03741	0	0	0	0	0	0.761952	0	23.2406
Traiguén	7.24909	4.24269	6.20689	2.89308	4.62485	2.20632	1.68277	2.03741	0.522249	0	0	0	0	1.31597	0.303281	33.2846
Treguaco	0.532139	0	7.02467	0	0	0.500356	0	0	0	0.671912	1.84112	0	0	0	0	10.5702
Tucapel	0.532139	0	7.02467	1.51551	5.3497	4.19345	0	0	0	0	0	0	0	0	0	18.6155
Valdivia	8.78631	0.4842	7.02467	5.64702	5.3497	4.6938	1.01385	0.514627	0	0	1.84112	0	0	0	0	35.3553
Vallenar	0	1.90577	7.02467	0	5.3497	0	0	0	0	0.671912	0	0	0	0.761952	0	15.714
Valparaíso	5.23798	4.34303	7.02467	4.24568	5.3497	1.37552	1.17208	0	1.2528	2.20947	0	0.49868	0	0.554019	0.303281	33.5669
Vichuquén	8.78631	0	7.02467	2.31341	5.3497	4.6938	0	0.514627	0	0.662395	0	0	0	0.761952	0	30.1069
Victoria	7.251	6.45473	3.87548	2.85404	5.3497	4.6938	0	0.514627	0	1.12509	1.84112	0	0.638746	2.14113	1.13651	37.876
Vicuña	0.532139	0	7.02467	0	5.3497	0	0	0	0	0.671912	0	0	0	2.14113	0	15.7195
Vilcún	7.13553	4.88531	7.02467	2.85404	4.62485	3.85948	0.503157	2.03741	1.23539	0.671912	1.84112	0	0	1.31597	0	37.9888
Villa Alegre	8.78631	0	7.02467	2.0622	5.3497	0	0.503157	0.514627	0	0.453176	1.84112	0	0	0	0	26.5349
Villa Alemana	8.51391	3.32226	7.02467	4.91075	0	1.32705	0.503157	2.03741	0.522249	1.37709	0	0	0	1.31597	0.303281	31.1578
Villarrica	9.278	3.59686	7.02467	3.67865	4.62485	2.98432	0.503157	2.03741	0.522249	0.50193	1.84112	0	0	1.31597	0	37.9092
Viña Del Mar	6.25583	1.23846	7.02467	0	4.62485	2.20199	1.68277	2.03741	0	1.37709	0	0	0.601118	1.31597	1.13651	29.4967
Vitacura	8.78631	6.81656	7.02467	6.82037	5.3497	0.500356	1.68277	0.514627	0	1.62702	1.84112	0	0	2.14113	0.775875	43.8805
Yerbas Buenas	8.78631	0	7.02467	2.04938	5.3497	0.500356	0	0.514627	0	0	0	0	0.638746	0.761952	0	25.6257
Yumbel	8.25417	0	7.02467	1.51969	5.3497	0	0	0	0	0.662395	1.84112	0	0	0	0	24.6517
Yungay	8.78631	0	7.02467	0	5.3497	0	0	0	0	0	0	0	0	2.14113	0	23.3018
Zapallar	8.78631	2.00611	7.02467	5.82794	4.62485	0.500356	1.68277	2.03741	0.522249	2.049	0	0	0	1.37918	0.303281	36.7441

## Sheet: Indice Puntaje Simple
Dimensión	Factor 1: Información de unidades municipales y funcionarios	Factor 2: Integración	Factor 3: Transparencia	Factor 4: Información Educacional y de Salud	Factor 5: Ley de Lobby	Factor 6: Concejo Comunal de Organizaciones de la Sociedad Civil (COSOC)	Factor 7: Beneficios, Deberes y Pagos	Factor 8: Contenido Informativo	Factor 9: Proyectos Comunales	Factor 10: Tramites Online	Factor 11: Valores	Factor 12: Consultas	Factor 13: Orientación	Factor 14: Medio Ambiente	Factor 15: Seguridad y Confiabilidad	Índice 1: Media Simple toda la muestra sin considerar dimensiones	Índice 2: Media Simple considerando el mismo peso por dimensión	Índice 3: Media Simple considerando el peso de la varianza total explicada		Total Variables	88
N° de Variables	12	10	10	12	6	6	8	3	3	5	3	2	2	3	3					Total Porcentaje	1
Propor. Var. Total Explicada	0.13	0.11	0.1	0.1	0.08	0.07	0.06	0.06	0.05	0.05	0.04	0.04	0.04	0.04	0.03
Lo Barnechea	1	1	1	0.916667	1	1	1	0.666667	1	0.8	0	0	0	1	0.666667	0.875	0.736667	0.831667
Las Condes	0.916667	1	1	0.916667	1	1	0.75	0.333333	0	0.4	0.666667	0	0	1	0.666667	0.795455	0.643333	0.7425
Santiago	0.916667	1	1	0.75	1	1	0.75	0.333333	0	1	0	0	0	1	0.333333	0.772727	0.605556	0.719167
El Quisco	0.916667	0.8	1	0.75	0.833333	0.833333	0.125	1	0	0.2	0.666667	0.5	1	0.666667	0.333333	0.693182	0.641667	0.708
San Antonio	1	0.9	1	0.666667	0.833333	0.666667	0.375	1	0.666667	0.2	0.666667	0	0	0.666667	0.333333	0.704545	0.598333	0.698167
Peñaflor	1	0.5	0.9	1	1	0.666667	0.125	0.666667	1	0.2	1	0	0	0.666667	0.333333	0.693182	0.603889	0.685833
Quilicura	0.916667	1	1	1	1	0.166667	0.75	0.666667	0	0	0	0	0	1	0.666667	0.715909	0.544444	0.665833
Quillota	1	0.9	1	0.583333	0.833333	0.5	0.875	1	0	0	0	0	0.5	0.666667	0.333333	0.681818	0.546111	0.658167
Padre Las Casas	0.916667	0.7	1	0.416667	0.833333	0.666667	0.375	1	0.333333	0.4	0.666667	0	0.5	0.666667	0.333333	0.647727	0.587222	0.653667
Vitacura	0.916667	0.9	1	0.833333	1	0.166667	0.375	0.333333	0	0.6	0.666667	0	0	1	0.666667	0.693182	0.563889	0.652333
Antofagasta	1	1	1	0.25	1	1	0.375	0	0	1	0.666667	0	0	0.666667	0.333333	0.681818	0.552778	0.650833
Providencia	1	1	1	0.916667	0	1	0.875	0.333333	0	0	0	0	0	1	0.666667	0.704545	0.519444	0.634167
Casablanca	0.916667	0.8	1	0.666667	1	0.5	0.25	0.333333	0.666667	0.4	0	0	0	1	0.333333	0.647727	0.524444	0.627167
Futaleufú	0.916667	1	1	0.666667	1	1	0.25	0.333333	0	0	0	0	0	0	1	0.647727	0.477778	0.610833
Pucón	0.916667	0.7	1	0.583333	0.833333	0.833333	0	1	0.333333	0.2	0	0	0.5	0.333333	0.333333	0.602273	0.504444	0.6095
San Felipe	0.916667	0.9	1	0.583333	0.833333	0.333333	0.375	1	0.333333	0.2	0	0	0	0.666667	0	0.613636	0.476111	0.602333
Vilcún	0.75	0.7	1	0.333333	0.833333	0.833333	0.125	1	0.666667	0.2	0.666667	0	0	0.666667	0	0.579545	0.518333	0.597
Curanilahue	0.916667	1	1	0.833333	1	0.166667	0	0.333333	0	0	0.666667	0	0	1	0	0.613636	0.461111	0.590833
Villarrica	1	0.5	1	0.416667	0.833333	0.666667	0.125	1	0.333333	0.2	0.666667	0	0	0.666667	0	0.579545	0.493889	0.5875
Victoria	0.75	0.9	0.6	0.333333	1	1	0	0.333333	0	0.4	0.666667	0	0.5	1	0.666667	0.579545	0.543333	0.5865
La Cisterna	0.916667	1	1	0.75	1	0.166667	0.375	0.333333	0	0	0	0	0	0.666667	0.666667	0.625	0.458333	0.585
Gorbea	0.666667	0.7	1	0.666667	0.833333	0.666667	0.125	1	0.333333	0	0	0	0.5	0.666667	0.333333	0.579545	0.499444	0.5845
La Cruz	0.666667	0.3	0.9	0.75	1	0.666667	0.25	1	0.333333	0.6	0.666667	0	0	0.333333	0.333333	0.590909	0.52	0.583
Temuco	1	0.7	1	0.75	0	0.5	0.375	1	0.333333	0.4	0	0	0	0.666667	0.666667	0.613636	0.492778	0.582833
Quilpué	1	0.5	1	0.166667	0.833333	0.666667	0.5	1	0.333333	0	0	0	0.5	0.666667	0.333333	0.568182	0.5	0.578333
Aysén	0.916667	0.8	1	0.25	0.833333	0.833333	0.125	1	0.333333	0.2	0.666667	0	0	0	0	0.568182	0.463889	0.578
Cabildo	0.75	0.5	1	0.583333	1	0.333333	0	1	0.333333	0.8	0	0.5	0	0.666667	0	0.568182	0.497778	0.5775
Santo Domingo	0.916667	0.6	1	0.333333	0.666667	0.666667	0.125	0.666667	0	0.6	1	0	0	0.666667	0.333333	0.579545	0.505	0.572667
Limache	0.75	0.7	1	0.5	0.833333	0.5	0.125	1	0.333333	0.2	0	0.5	0	0.333333	0.333333	0.556818	0.473889	0.563667
Zapallar	0.916667	0.3	1	0.666667	0.833333	0.166667	0.375	1	0.333333	0.6	0	0	0	0.666667	0.333333	0.579545	0.479444	0.563
Pitrufquén	0.75	0.5	1	0.416667	1	0.666667	0.125	1	0.333333	0	0	0	0.5	0.666667	0.333333	0.545455	0.486111	0.561667
Chiguayante	0.916667	1	1	0	1	0.166667	0.375	0.333333	0	0.2	0.666667	0	0.5	1	0	0.556818	0.477222	0.56
San Javier	0.916667	0.9	1	0.666667	1	0.166667	0.125	0.333333	0	0	0.666667	0	0	0.666667	0	0.579545	0.429444	0.557333
Peñalolén	0.916667	0.9	1	0.75	1	0.166667	0.375	0.333333	0	0	0.666667	0	0	0	0	0.590909	0.407222	0.554
Loncoche	0.833333	0.5	1	0.416667	0.666667	0.666667	0.125	1	0.666667	0	0	0	0.5	0.666667	0	0.534091	0.469444	0.5525
Panquehue	0.75	0.5	1	0.5	0.833333	0.666667	0	1	0.333333	0	0.666667	0	0.5	0.333333	0	0.534091	0.472222	0.5525
Los Sauces	0.833333	0.5	1	0.333333	0.833333	0.5	0.125	1	0.333333	0	0	0	1	0.666667	0	0.522727	0.475	0.549167
Huechuraba	0.916667	0	1	0.833333	1	1	0.375	0.333333	0	0	0.333333	0	0	1	0	0.579545	0.452778	0.548333
Teodoro Schmidt	0.916667	0.7	1	0.333333	0.833333	0.5	0	0	0.666667	0	0.666667	0	0.5	0.666667	0.333333	0.545455	0.474444	0.547833
Nueva Imperial	0.75	0.6	1	0.333333	0.833333	0.5	0.125	1	0	0.2	0.666667	0	0.5	0.333333	0.333333	0.534091	0.478333	0.546
Mostazal	0.916667	1	1	0.583333	1	0	0.25	0.333333	0	0	0	0	0	0.333333	1	0.579545	0.427778	0.545833
Machalí	0.916667	0.9	1	0.666667	0	1	0.375	0	0	0.6	0.666667	0	0	0	0.333333	0.602273	0.430556	0.544
San Joaquín	0.916667	0.9	1	0.333333	1	1	0.375	0.333333	0	0	0	0	0	0	0	0.568182	0.390556	0.544
Punta Arenas	0.916667	0.4	1	0.5	0.833333	0.666667	0.375	0.666667	0	0.6	0	0	0	0.333333	0.333333	0.568182	0.441667	0.542333
Lonquimay	0.833333	0.5	1	0.416667	0.833333	0.666667	0.125	1	0.666667	0	0	0	0.5	0	0	0.522727	0.436111	0.539167
Coyhaique	1	0.6	1	0.333333	0.833333	0.666667	0.125	1	0	0.2	0.333333	0	0	0	0	0.534091	0.406111	0.5335
Paine	0.916667	0.1	1	0.5	1	1	0.125	0.333333	0	0	0.666667	0	0	0.666667	0.666667	0.545455	0.465	0.531
Olmué	0.75	0.7	1	0.666667	0.833333	0.166667	0	0.666667	0.333333	0	0.333333	0	1	0	0	0.522727	0.43	0.5295
Algarrobo	0.833333	0.6	1	0.583333	1	0.5	0.125	0	0	0.2	0.666667	0	0	0.666667	0.333333	0.556818	0.433889	0.5285
La Reina	0.916667	0.5	1	0	1	1	0.75	0.333333	0	0	0	0	0	0.666667	0.333333	0.545455	0.433333	0.525833
San Esteban	0.75	0.5	1	0.5	0.833333	0.333333	0	0.666667	0.333333	0.6	0.333333	0	0.5	0.333333	0	0.522727	0.445556	0.525833
La Ligua	0.916667	0.4	1	0.333333	0.833333	0.5	0.125	0.666667	0.333333	0.6	0	0	0	0.333333	0.666667	0.534091	0.447222	0.525667
Valparaíso	0.583333	0.6	1	0.583333	1	0.333333	0.25	0	0.666667	0.6	0	0.5	0	0.333333	0.333333	0.545455	0.452222	0.525167
Santa Bárbara	1	0.4	1	0.25	1	1	0.375	0	0	0	0.666667	0	0	0.666667	0	0.545455	0.423889	0.524833
Traiguén	0.75	0.6	0.9	0.333333	0.833333	0.5	0.375	1	0.333333	0	0	0	0	0.666667	0.333333	0.522727	0.441667	0.524333
Curacautín	0.916667	0.6	0.9	0.416667	0.666667	0.5	0.125	0.666667	0.333333	0	0.666667	0	0	0.666667	0	0.522727	0.430556	0.522667
Iquique	0.916667	0.7	0.7	0.333333	1	0.666667	0.25	0	0	0.6	0.666667	0	0	0	0.666667	0.545455	0.433333	0.517833
Cunco	1	0.7	1	0.166667	0.666667	0.166667	0.125	0.666667	0	0.2	0.666667	0	0.5	0.333333	0.333333	0.511364	0.435	0.516167
Ránquil	0.75	0.1	1	0.416667	1	1	0.125	0	0	0.6	0.666667	0	0	1	0.333333	0.534091	0.466111	0.514333
Papudo	0.666667	0.5	1	0.833333	0.666667	0.333333	0	0.666667	0.333333	0	0.666667	0	0	0.666667	0	0.522727	0.422222	0.511667
Cartagena	0.916667	0.1	1	0.166667	0.833333	0.5	0.25	1	0.333333	0	0.666667	0.5	0	0.333333	0.333333	0.488636	0.462222	0.510167
Valdivia	0.916667	0.1	1	0.666667	1	1	0.25	0.333333	0	0	0.666667	0	0	0	0	0.534091	0.395556	0.5085
Melipeuco	0.416667	0.6	1	0.166667	0.833333	0.5	0	1	0.333333	0.4	0.666667	0	0.5	0.333333	0.333333	0.477273	0.472222	0.505167
La Florida	0.916667	1	1	0	1	0.166667	0.625	0.333333	0	0	0	0	0	0.666667	0	0.522727	0.380556	0.505
Ancud	0.916667	1	1	0	1	0.166667	0.375	0.333333	0	0	0	0	0	1	0	0.511364	0.386111	0.503333
Angol	0.75	0.2	1	0.416667	1	0.833333	0.125	0	0.333333	0.2	0.666667	0	0	1	0	0.511364	0.435	0.500333
Perquenco	0.666667	0.4	1	0.333333	0.666667	0.5	0.125	1	0.333333	0	0.666667	0	0	0.666667	0.333333	0.488636	0.446111	0.499833
Concón	0.666667	0.6	0.7	0.583333	1	0.166667	0	1	0	0.2	0.666667	0	0.5	0	0.333333	0.488636	0.427778	0.499333
Lautaro	0.916667	0.1	1	0.416667	0.833333	0.333333	0.5	0.666667	0	0.4	0	0	0.5	0.666667	0	0.511364	0.422222	0.4985
Maipú	0.916667	0.5	1	0	1	0.166667	0.375	0.333333	0	0.8	0.666667	0	0	0.333333	0.333333	0.511364	0.428333	0.498333
San Fernando	0.916667	1	1	0.0833333	1	0.166667	0.125	0.333333	0	0	0	0	0	1	0	0.5	0.375	0.496667
Villa Alemana	0.916667	0.5	1	0.583333	0	0.333333	0.125	1	0.333333	0.4	0	0	0	0.666667	0.333333	0.511364	0.412778	0.496667
Litueche	0.916667	0	1	0.583333	1	1	0.125	0.333333	0	0	0	0	0	1	0	0.511364	0.397222	0.495
Los Andes	0.916667	0.2	1	0.833333	0.833333	0.5	0.25	0	0	0.2	0	0	0.5	0.333333	0.333333	0.534091	0.393333	0.4945
Puerto Montt	0.916667	0	1	0.833333	1	0.166667	0.5	0.333333	0	0.2	0	0	0	1	0	0.534091	0.396667	0.494167
Putaendo	0.75	0.6	1	0.583333	1	0.166667	0	0.666667	0.333333	0.2	0	0	0	0.333333	0	0.5	0.375556	0.4935
San Clemente	0.916667	0	1	1	1	0	0.125	0	0	0	0.666667	0	0.5	1	0	0.522727	0.413889	0.493333
La Unión	0.916667	0.1	1	0.666667	1	0.166667	0.25	0.333333	0	0	0.666667	0	0	1	0	0.511364	0.406667	0.490167
Purén	0.75	0.4	1	0.166667	0.833333	0.833333	0	1	0	0	0	0	0.5	0.666667	0	0.465909	0.41	0.489833
Saavedra	0.916667	0.2	1	0.166667	0.833333	0.5	0	1	0	0	0	0	0.5	1	0.333333	0.465909	0.43	0.4895
Collipulli	0.916667	0.4	1	0.166667	0.833333	0.5	0	0.666667	0.333333	0.2	0.666667	0	0	0	0.333333	0.477273	0.401111	0.484833
Hijuelas	0.916667	0.2	0.9	0.75	0.833333	0.166667	0	0.666667	0	0.2	0	0	1	0	0.333333	0.488636	0.397778	0.4845
Osorno	1	0	1	0.0833333	1	1	0.25	0.333333	0	0.4	0.666667	0	0	0.333333	0	0.488636	0.404444	0.483333
El Tabo	0.833333	0.7	1	0.25	0.666667	0.166667	0.375	1	0	0	0	0	0	0.333333	0.333333	0.488636	0.377222	0.481167
Viña Del Mar	0.666667	0.2	1	0	0.833333	0.5	0.375	1	0	0.4	0	0	0.5	0.666667	0.666667	0.465909	0.453889	0.4795
Los Muermos	0.916667	0	1	0.666667	1	0.166667	0.25	0.333333	0	0	0.666667	0	0	1	0	0.5	0.4	0.479167
Santa María	0.583333	0.2	0.9	0.583333	0.833333	0.833333	0	1	0	0.2	0	0	0	0.666667	0.333333	0.477273	0.408889	0.477833
Hualqui	0.916667	0.9	1	0	1	0.166667	0.25	0.333333	0	0.6	0	0	0	0	0	0.488636	0.344444	0.474833
Los Ángeles	0.916667	0.4	1	0	1	1	0	0.333333	0	0	0.666667	0	0	0.333333	0	0.465909	0.376667	0.473167
Guaitecas	0.75	0.5	1	0.25	0.666667	0.5	0	1	0	0	0	0	0.5	0.666667	0	0.454545	0.388889	0.4725
Cholchol	0.666667	0.3	1	0.166667	0.833333	0.666667	0	1	0.333333	0.2	0	0	0.5	0.333333	0	0.443182	0.4	0.469667
Puchuncaví	0.833333	0.6	0.4	0.333333	0.833333	0.166667	0.25	1	0	0.4	0	0	0.5	0.666667	0	0.454545	0.398889	0.467667
Coinco	0.916667	0	1	0.333333	1	0.166667	0.875	0.333333	0	0.6	0	0	0.5	0	0	0.5	0.381667	0.466667
Lumaco	0.75	0.6	1	0.333333	0.5	0.833333	0.125	0.666667	0.333333	0	0	0	0	0	0	0.465909	0.342778	0.459333
Cerrillos	1	0	1	0	1	1	0.375	0.333333	0	0.2	0.666667	0	0	0	0	0.465909	0.371667	0.459167
Ercilla	0.583333	0.3	1	0.25	0.833333	0.5	0	1	0.333333	0	0.666667	0	0.5	0	0	0.431818	0.397778	0.458833
San Juan De La Costa	1	0.5	1	0.583333	1	0	0.25	0.333333	0	0	0	0	0	0	0	0.488636	0.311111	0.458333
El Bosque	1	0	1	0.416667	1	0.166667	0.125	0.333333	0	0	0.666667	0	0	1	0	0.465909	0.380556	0.4575
Chillán	0.916667	1	1	0	1	0	0.125	0	0	0	0	0	0	1	0	0.465909	0.336111	0.456667
Purranque	0.916667	0	1	0.333333	1	0.833333	0.25	0.333333	0	0	0	0	0	0	1	0.477273	0.377778	0.455833
Renca	0.916667	0	1	0.666667	1	0.166667	0.5	0.333333	0	0	0	0	0	0.666667	0	0.488636	0.35	0.454167
Independencia	0.916667	0	1	0.666667	1	0.166667	0.25	0.333333	0	0	0	0	0	1	0	0.477273	0.355556	0.4525
Freire	0.666667	0.1	1	0.5	0.833333	0.5	0.125	0.333333	0	0	0.666667	0	0.5	0.666667	0	0.454545	0.392778	0.450167
Quintero	0.916667	0.1	0.9	0.0833333	0.666667	0.5	0	1	0.333333	0.4	0	0	0	0.666667	0.333333	0.431818	0.393333	0.450167
Licantén	0.916667	0	1	1	1	0.166667	0.125	0	0	0	0.666667	0	0	0	0	0.488636	0.325	0.445
Tiltil	0.916667	0.5	1	0	1	1	0	0.333333	0	0	0	0	0	0	0	0.443182	0.316667	0.444167
Estación Central	1	0	1	0.333333	1	0.166667	0.75	0.333333	0	0.2	0	0	0	0.333333	0	0.477273	0.341111	0.443333
Curicó	0.916667	0	1	0.416667	1	0.166667	0.5	0.333333	0	0	0.666667	0	0	0.333333	0	0.465909	0.355556	0.4425
San José De Maipo	0.916667	0	1	0.0833333	1	0.166667	0.5	0.333333	0	0.4	0.666667	0	0	0.666667	0	0.454545	0.382222	0.4425
Hualpén	0.833333	0	1	0.916667	1	0	0.25	0.333333	0	0	0	0	0	0.666667	0	0.477273	0.333333	0.441667
Paillaco	0.916667	0	1	0.333333	1	0.166667	0.125	0.333333	0	0	0.666667	0	0	1	0	0.443182	0.369444	0.438333
Cañete	0.916667	0	1	0.666667	1	0.166667	0	0.333333	0	0	0	0	0	1	0	0.454545	0.338889	0.4375
Colina	0.916667	0	1	0.5	1	0	0.75	0.333333	0	0.2	0	0	0	0.333333	0	0.477273	0.335556	0.4375
Rancagua	0.916667	0	1	0	1	0.166667	0.5	0.333333	0	1	0	0	0	0.666667	0	0.454545	0.372222	0.4375
Vichuquén	0.916667	0	1	0.25	1	1	0	0.333333	0	0.2	0	0	0	0.333333	0	0.443182	0.335556	0.4375
Arauco	0.916667	0	1	0	1	1	0.125	0.333333	0	0	1	0	0	0	0	0.431818	0.358333	0.436667
San Bernardo	0.916667	0	1	0	1	1	0.125	0.333333	0	0	0.666667	0	0	0.333333	0	0.431818	0.358333	0.436667
Puente Alto	0.916667	0	1	0.583333	1	0	0.5	0.333333	0	0	0.666667	0	0	0	0	0.465909	0.333333	0.434167
Rengo	1	0	1	0.5	1	0	0.125	0.333333	0	0	0.666667	0	0.5	0	0	0.443182	0.341667	0.434167
Rinconada	0.75	0.8	0.8	0.333333	0.833333	0.833333	0	0	0	0	0	0	0	0	0.333333	0.454545	0.312222	0.433833
Futrono	0.833333	0	1	0	1	1	0.25	0.333333	0	0	0	0	0	1	0	0.431818	0.361111	0.433333
Fresia	0.916667	0	1	0	1	1	0.25	0.333333	0	0	0.666667	0	0	0	0	0.431818	0.344444	0.430833
Galvarino	0.666667	0.4	1	0.0833333	0.833333	0.5	0	1	0.333333	0	0	0	0	0.333333	0	0.409091	0.343333	0.430667
Frutillar	0.916667	0.1	1	0.333333	1	0.166667	0.25	0.333333	0	0	0	0	0	1	0	0.443182	0.34	0.430167
Sierra Gorda	0.916667	0.1	1	0.583333	1	0	0.125	0	0	0.8	0	0	0	0.333333	0	0.465909	0.323889	0.429333
Calle Larga	0.166667	0.3	1	0.666667	0.666667	0.166667	0.125	1	0	0.4	0	0	1	0.333333	0	0.420455	0.388333	0.427167
Talagante	0.916667	0.5	1	0.333333	1	0.166667	0.125	0.333333	0	0	0	0	0	0	0	0.443182	0.291667	0.426667
Antuco	0.916667	0	1	0	1	1	0.375	0.333333	0	0	0	0	0	0.333333	0	0.431818	0.330556	0.425
Macul	0.916667	0	1	0	1	1	0.375	0.333333	0	0	0	0	0	0.333333	0	0.431818	0.330556	0.425
Quemchi	0.916667	0.1	1	0.666667	1	0.166667	0.25	0.333333	0	0	0	0	0	0	0	0.454545	0.295556	0.4235
Puerto Varas	1	0	1	0	1	1	0.375	0.333333	0	0	0	0	0	0	0	0.431818	0.313889	0.4225
Calera	0.666667	0.2	1	0.166667	0.833333	0.833333	0.125	0	0.333333	0	0	0	0.5	0.666667	0	0.420455	0.355	0.421167
Pedro Aguirre Cerda	0.916667	0	1	0.75	1	0.166667	0.25	0.333333	0	0	0	0	0	0	0	0.454545	0.294444	0.420833
La Pintana	1	0.1	1	0.416667	1	0.166667	0.25	0.333333	0	0	0	0	0	0	0.333333	0.443182	0.306667	0.419333
Paredones	0.916667	0	1	0.25	1	0.166667	0	0.333333	0	0	0.666667	0	0	0.666667	0.333333	0.420455	0.355556	0.419167
Cabo De Hornos	0.75	0.3	1	0.166667	0.833333	0.5	0	0.666667	0.333333	0	0	0	0	0.333333	0	0.409091	0.325556	0.418833
Nancagua	0.833333	1	1	0	1	0	0	0.333333	0	0	0	0	0	0	0	0.420455	0.277778	0.418333
Queilén	0.916667	0	1	0	1	0.166667	0.25	0.333333	0	0	0	0	0	1	1	0.420455	0.377778	0.415833
Curarrehue	0.75	0.1	1	0.25	0.833333	0.5	0	1	0	0	0	0	0.5	0	0	0.397727	0.328889	0.415167
Lo Prado	0.916667	0	1	0	1	1	0.25	0.333333	0	0	0	0	0	0	0.333333	0.420455	0.322222	0.414167
Carahue	0.666667	0.4	1	0.0833333	0	0.5	0	1	0	0	0	0	1	1	0	0.386364	0.376667	0.414
Concepción	0.916667	0	1	0	1	0.166667	0.375	0.333333	0	0.4	0.666667	0	0	0.333333	0	0.420455	0.346111	0.413333
Lolol	0.916667	0	1	0.666667	1	0	0	0.333333	0	0	0.666667	0	0	0	0	0.431818	0.305556	0.4125
Tomé	0.916667	0.4	1	0	0	0	0.25	1	0	0	0.666667	0.5	0	0.666667	0	0.397727	0.36	0.4115
Lo Espejo	0.916667	0	1	0.416667	1	0	0.375	0.333333	0	0	0.666667	0	0	0	0	0.431818	0.313889	0.41
Padre Hurtado	0.833333	0.3	0.7	0.166667	1	0.333333	0.125	0.666667	0	0.2	0	0	0.5	0	0	0.397727	0.321667	0.408833
Talcahuano	0.916667	0.1	1	0.0833333	1	0.5	0.125	0.333333	0	0	0	0	0	0.666667	0	0.409091	0.315	0.407667
Salamanca	0.916667	0	1	0.0833333	1	1	0	0.333333	0	0.2	0	0	0	0	0	0.409091	0.302222	0.4075
Florida	0.916667	0	1	0	1	0.166667	0.375	0.333333	0	0	0.666667	0	0	0.666667	0	0.409091	0.341667	0.406667
La Estrella	0.916667	0	1	0	1	0.166667	0.125	0.333333	0	0	0.666667	0	0	1	0	0.397727	0.347222	0.405
Los Álamos	0.916667	0	1	0	1	0.5	0	0.333333	0	0.2	0.666667	0	0	0.333333	0	0.397727	0.33	0.404167
Juan Fernández	0.666667	0.1	0.6	0.583333	0.666667	0	0	1	0	0	0.666667	0.5	0	0.666667	0	0.386364	0.363333	0.402667
San Gregorio	0.166667	0.4	1	0.25	0.833333	0.5	0	1	0.333333	0	0	0	0.5	0.333333	0	0.375	0.354444	0.402333
La Granja	0.916667	0	1	0.333333	1	0	0.375	0.333333	0	0	0	0	0	0.666667	0	0.420455	0.308333	0.401667
Nogales	0.416667	0	1	0.25	0.833333	0.5	0	1	0	0	0.666667	0	0.5	0.333333	0	0.375	0.366667	0.400833
Ovalle	0.916667	0	1	0	1	0.166667	0.125	0	0	0.8	0.666667	0	0	0.333333	0	0.409091	0.333889	0.398333
Curacaví	0.916667	0	1	0	1	1	0.125	0.333333	0	0	0	0	0	0	0	0.397727	0.291667	0.396667
Chimbarongo	0.916667	0.5	1	0.0833333	1	0	0	0.333333	0	0	0	0	0	0.333333	0	0.397727	0.277778	0.395833
Toltén	0.0833333	0.3	1	0.166667	0.833333	0.833333	0	1	0.333333	0	0	0	0.5	0.333333	0	0.363636	0.358889	0.3955
Arica	0.916667	0	0.7	0.166667	1	0.333333	0.375	0	0	0	1	0	0	0.333333	0.333333	0.409091	0.343889	0.395
O'Higgins	0.583333	0	0.9	0.5	0.833333	0.5	0	0.666667	0	0.2	0	0	0	0.666667	0	0.397727	0.323333	0.394167
Chépica	0.833333	0	1	0.5	1	0.166667	0	0.333333	0	0.2	0	0	0	0.333333	0	0.409091	0.291111	0.393333
Mulchén	0.916667	0	1	0	1	0.166667	0.375	0.333333	0	0	0.666667	0	0	0.333333	0	0.397727	0.319444	0.393333
Malloa	0.916667	0	1	0.666667	1	0.166667	0.25	0	0	0	0	0	0	0	0	0.431818	0.266667	0.3925
Melipilla	0.916667	0	1	0	1	0.166667	0.375	0.333333	0	0.2	0	0	0	0.666667	0	0.397727	0.310556	0.39
Cochrane	0.583333	0	0.9	0.0833333	0.666667	0.5	0	1	0.333333	0.2	0	0.5	0.5	0	0	0.352273	0.351111	0.389167
Yerbas Buenas	0.916667	0	1	0.25	1	0.166667	0	0.333333	0	0	0	0	0.5	0.333333	0	0.386364	0.3	0.389167
Coquimbo	0.916667	0	1	0.333333	1	0.166667	0.125	0	0	0.2	0.666667	0	0	0	0	0.409091	0.293889	0.388333
Villa Alegre	0.916667	0	1	0.25	1	0	0.125	0.333333	0	0.2	0.666667	0	0	0	0	0.397727	0.299444	0.388333
Pinto	1	0	1	0	1	0	0	0	0	0.2	0.666667	0	0	1	0	0.386364	0.324444	0.386667
Puyehue	0.916667	0	1	0.416667	1	0	0.25	0.333333	0	0	0	0	0	0	0.333333	0.409091	0.283333	0.385833
Olivar	0.916667	0	1	0	1	0.166667	0.125	0.333333	0	0	0	0	0.5	0.666667	0	0.375	0.313889	0.385
Rauco	0.916667	0	1	0	1	1	0.25	0	0	0	0	0	0	0	0	0.397727	0.277778	0.384167
Coronel	0.916667	0	1	0	1	0.166667	0.25	0.333333	0	0.2	0	0	0	0.666667	0	0.386364	0.302222	0.3825
Calbuco	0.916667	0	1	0	1	0	0.375	0.333333	0	0	0	0	0	1	0	0.386364	0.308333	0.381667
El Monte	0.916667	0	1	0.166667	1	0.166667	0.125	0.333333	0	0	0	0	0	0.666667	0	0.386364	0.291667	0.381667
Río Verde	0.5	0.3	1	0.333333	0.833333	0.333333	0	1	0	0	0	0	0	0	0	0.375	0.286667	0.381333
Nacimiento	0.916667	0	1	0	1	0.166667	0.375	0.333333	0	0	0.666667	0	0	0	0	0.386364	0.297222	0.38
Río Negro	0.916667	0	1	0.0833333	1	0.166667	0.125	0.333333	0	0	0.333333	0	0.5	0	0	0.375	0.297222	0.38
Palena	0.916667	0	1	0	1	0.166667	0.125	0.333333	0	0	0	0	0	1	0	0.375	0.302778	0.378333
Puqueldón	0.916667	0	1	0	1	0.166667	0.125	0.333333	0	0	0	0	0	1	0	0.375	0.302778	0.378333
Laja	0.833333	0	1	0.333333	1	0	0.375	0.333333	0	0	0	0	0	0.333333	0	0.397727	0.280556	0.3775
Linares	0.916667	0	1	0.5	1	0	0.125	0.333333	0	0	0	0	0	0	0	0.397727	0.258333	0.376667
Codegua	0.916667	0	1	0.0833333	1	0.166667	0.25	0.333333	0	0.2	0	0	0	0	0.333333	0.386364	0.285556	0.374167
Los Lagos	0.916667	0	1	0	1	0	0.25	0.333333	0	0	0	0	0	1	0	0.375	0.3	0.374167
Recoleta	0.916667	0	1	0.416667	0	1	0.375	0	0	0	0	0	0.5	0	0	0.409091	0.280556	0.373333
Colbún	1	0	1	0.25	1	0.166667	0	0	0	0	0	0	0	0.666667	0	0.386364	0.272222	0.373333
Teno	0.916667	0	1	0.25	1	0	0.125	0	0	0	0	0	0	1	0	0.386364	0.286111	0.371667
Tortel	0.75	0.3	1	0.0833333	0.333333	0.333333	0.125	1	0	0	0	0	0	0.333333	0	0.363636	0.283889	0.369667
Retiro	0.916667	0	1	0.0833333	1	0.166667	0	0.333333	0	0.2	0	0	0.5	0	0	0.363636	0.28	0.369167
Cabrero	0.916667	0	1	0	1	0	0.375	0.333333	0	0	0	0	0	0.666667	0	0.375	0.286111	0.368333
Pudahuel	0.916667	0	1	0.166667	1	0	0.375	0.333333	0	0.2	0	0	0	0	0	0.386364	0.266111	0.368333
San Pedro	0.916667	0	1	0.416667	1	0	0.125	0.333333	0	0	0	0	0	0	0	0.386364	0.252778	0.368333
Catemu	1	0	1	0.166667	0.833333	0.166667	0	0.666667	0	0	0	0	0	0	0	0.363636	0.255556	0.365
Conchalí	0.833333	0	1	0.166667	1	0.166667	0.125	0.333333	0	0	0	0	0	0	0.666667	0.375	0.286111	0.364167
Porvenir	1	0	1	0	1	0	0.125	0.333333	0	0	0.666667	0	0	0	0	0.363636	0.275	0.364167
Isla de Maipo	0.5	0.3	0.6	0.166667	0.666667	0.5	0.125	0	0	0.4	0	0.5	1	0.333333	0	0.352273	0.339444	0.363833
Pelarco	0.916667	0	1	0	1	0	0.125	0	0	0.2	0	0	0.5	0.666667	0	0.363636	0.293889	0.363333
Hualaihué	0.833333	0	1	0	1	0	0.25	0.333333	0	0	0	0	0	1	0	0.363636	0.294444	0.363333
Panguipulli	0.833333	0	1	0	1	0	0.25	0	0	0	0	0	0	1	0.666667	0.375	0.316667	0.363333
Renaico	0.75	0.2	0.9	0	0.833333	0.666667	0	0.333333	0	0	0	0	0.5	0	0	0.352273	0.278889	0.362833
La Serena	0.833333	0	1	0	1	0	0.125	0	0	0	0.666667	0	0	1	0	0.363636	0.308333	0.3625
Cisnes	0.166667	0.2	1	0.0833333	0.833333	0.333333	0	0.666667	0.333333	0.4	0	0	0	1	0	0.340909	0.334444	0.358667
Quinta Normal	0.916667	0.1	1	0.333333	0	1	0.25	0	0	0	0	0	0	0	0.333333	0.397727	0.262222	0.3585
Petorca	0.166667	0.6	1	0.0833333	0.833333	0.166667	0.125	0.666667	0.333333	0.2	0	0	0	0	0.333333	0.352273	0.300556	0.3585
Natales	0.916667	0.1	1	0	1	0	0.125	0	0	0	0	0	0	1	0	0.363636	0.276111	0.357667
Diego De Almagro	0.916667	0.2	1	0.166667	1	0	0.125	0	0	0.2	0	0	0	0	0	0.375	0.240556	0.355333
Graneros	0.916667	0	1	0	1	0	0.125	0.333333	0	0	0.666667	0	0	0	0	0.352273	0.269444	0.353333
Pichilemu	0.916667	0	1	0	1	0	0.125	0.333333	0	0	0	0	0	0.666667	0	0.352273	0.269444	0.353333
Río Bueno	0.916667	0	1	0	1	0.166667	0.375	0.333333	0	0	0	0	0	0	0	0.363636	0.252778	0.353333
Molina	0.916667	0	1	0	1	0.166667	0.125	0.333333	0	0	0	0	0	0.333333	0	0.352273	0.258333	0.351667
Laguna Blanca	0.583333	0	1	0.25	0.5	0.5	0.25	1	0	0	0	0	0	0	0	0.352273	0.272222	0.350833
Lago Verde	0.833333	0	0.7	0.333333	0.5	0.166667	0	0	0.333333	0.4	0	0	0	1	0.333333	0.363636	0.306667	0.35
Camarones	0.166667	0.1	1	0.333333	1	0.5	0.125	0	0	0.4	1	0	0	0	0	0.363636	0.308333	0.3485
San Pedro De Atacama	0.916667	0	1	0.0833333	1	0	0.125	0	0	0.4	0.333333	0	0	0	0	0.363636	0.257222	0.348333
Doñihue	0.916667	0	1	0	1	0	0.25	0.333333	0	0	0	0	0	0.333333	0	0.352273	0.255556	0.3475
Alhué	0.916667	0	1	0	1	0	0.125	0.333333	0	0	0	0	0.5	0	0	0.340909	0.258333	0.346667
Coltauco	0.916667	0	1	0	1	0	0.125	0.333333	0	0	0	0.5	0	0	0	0.340909	0.258333	0.346667
Maule	0.916667	0	0.9	0	1	0	0.125	0	1	0	0	0	0	0	0	0.340909	0.262778	0.346667
Dalcahue	0.916667	0	1	0	1	0.166667	0.25	0.333333	0	0	0	0	0	0	0	0.352273	0.244444	0.345833
Llanquihue	0.916667	0	1	0	1	0.166667	0.25	0.333333	0	0	0	0	0	0	0	0.352273	0.244444	0.345833
Penco	0.916667	0	1	0	1	0.166667	0.25	0.333333	0	0	0	0	0	0	0	0.352273	0.244444	0.345833
Quellón	0.916667	0	1	0	1	0.166667	0.25	0.333333	0	0	0	0	0	0	0	0.352273	0.244444	0.345833
Navidad	0.916667	0	1	0	1	0.166667	0	0.333333	0	0	0	0	0	0.333333	0	0.340909	0.25	0.344167
Río Claro	0.916667	0	1	0	1	0.166667	0	0.333333	0	0	0	0	0	0.333333	0	0.340909	0.25	0.344167
Río Ibáñez	0.166667	0.3	1	0.166667	0.666667	0.5	0.125	0.666667	0.333333	0	0	0.5	0	0	0	0.329545	0.295	0.343833
Yumbel	0.833333	0	1	0.166667	1	0	0	0	0	0.2	0.666667	0	0	0	0	0.352273	0.257778	0.341667
Lebu	0.916667	0	1	0	1	0	0.125	0.333333	0	0	0	0	0	0.333333	0	0.340909	0.247222	0.34
Negrete	0.916667	0	1	0	1	0	0.125	0.333333	0	0	0	0	0	0.333333	0	0.340909	0.247222	0.34
Pelluhue	0.916667	0	1	0	1	0	0.125	0.333333	0	0	0	0	0	0.333333	0	0.340909	0.247222	0.34
Pica	0.916667	0.1	0.9	0.0833333	1	0	0.125	0	0	0.2	0	0	0	0.333333	0	0.352273	0.243889	0.339333
Yungay	0.916667	0	1	0	1	0	0	0	0	0	0	0	0	1	0	0.340909	0.261111	0.339167
Buin	0.916667	0	1	0	1	0.166667	0.125	0.333333	0	0	0	0	0	0	0	0.340909	0.236111	0.338333
Cerro Navia	0.916667	0	1	0	1	0.166667	0.125	0.333333	0	0	0	0	0	0	0	0.340909	0.236111	0.338333
Marchihue	0.916667	0	1	0	1	0.166667	0.125	0.333333	0	0	0	0	0	0	0	0.340909	0.236111	0.338333
Alto Del Carmen	0.916667	0.2	1	0.166667	1	0	0	0	0	0	0	0	0	0	0	0.352273	0.218889	0.337833
Palmilla	0.916667	0	0.9	0	1	0	0	0.333333	0	0	0	0	0	0.666667	0	0.329545	0.254444	0.335833
Torres Del Paine	0.833333	0	1	0	1	0	0.125	0	0	0	0	0	0	1	0	0.340909	0.263889	0.335833
Parral	0.0833333	0.3	1	0	1	1	0.125	0.333333	0	0	0	0	0	0.333333	0	0.329545	0.278333	0.334667
Castro	0.916667	0	1	0	1	0	0.25	0.333333	0	0	0	0	0	0	0	0.340909	0.233333	0.334167
Chonchi	0.916667	0	1	0	1	0	0.25	0.333333	0	0	0	0	0	0	0	0.340909	0.233333	0.334167
Cochamó	0.916667	0	1	0	1	0	0.25	0.333333	0	0	0	0	0	0	0	0.340909	0.233333	0.334167
Lota	0.916667	0	1	0	1	0	0.25	0.333333	0	0	0	0	0	0	0	0.340909	0.233333	0.334167
Maullín	0.916667	0	1	0	1	0	0.25	0.333333	0	0	0	0	0	0	0	0.340909	0.233333	0.334167
San Pedro De La Paz	0.916667	0	1	0.416667	0.166667	0	0.5	0.333333	0	0.2	0	0	0	0	0	0.375	0.235556	0.334167
Chanco	0.916667	0	1	0	1	0	0	0.333333	0	0	0	0	0	0.333333	0	0.329545	0.238889	0.3325
Portezuelo	0.916667	1	1	0	0	0	0	0	0	0	0	0	0	0	0	0.352273	0.194444	0.329167
San Rafael	0.916667	0	1	0.0833333	1	0	0	0.333333	0	0	0	0	0	0	0	0.329545	0.222222	0.3275
Hualañé	0.916667	0	1	0	1	0	0.125	0.333333	0	0	0	0	0	0	0	0.329545	0.225	0.326667
Lago Ranco	0.916667	0	1	0	1	0	0.125	0.333333	0	0	0	0	0	0	0	0.329545	0.225	0.326667
Quilaco	0.916667	0	1	0	1	0	0.125	0.333333	0	0	0	0	0	0	0	0.329545	0.225	0.326667
Sagrada Familia	0.916667	0	1	0	1	0	0.125	0.333333	0	0	0	0	0	0	0	0.329545	0.225	0.326667
San Pablo	0.833333	0	1	0	1	0	0.25	0.333333	0	0	0	0	0	0	0	0.329545	0.227778	0.323333
Bulnes	0.833333	0	1	0.333333	1	0	0	0	0	0	0	0	0	0	0	0.340909	0.211111	0.321667
Llaillay	0.25	0.1	1	0.25	0.666667	0.5	0.125	0.333333	0	0.2	0	0	0	0.666667	0	0.329545	0.272778	0.321
Tirúa	0.916667	0	0.9	0	1	0.166667	0	0.333333	0	0	0	0	0	0	0	0.318182	0.221111	0.320833
Curaco De Vélez	0.416667	0.1	1	0	1	0	0.25	0.333333	0	0	0	0	0	1	0	0.318182	0.273333	0.320167
Talca	0.416667	0	1	0.5	1	0	0.25	0	0	0.4	0	0	0	0	0	0.352273	0.237778	0.319167
María Pinto	0.0833333	0	1	0	1	1	0.125	0.333333	0	0	0.666667	0	0	0	0	0.306818	0.280556	0.315
Primavera	0.0833333	0	1	0.666667	1	0	0.125	0.333333	0	0	0	0	0	0.666667	0	0.329545	0.258333	0.311667
El Carmen	0.0833333	0.1	1	0	1	0	0.375	0	0	0.4	0.666667	0	0	1	0	0.318182	0.308333	0.311
Mejillones	0.916667	0.1	1	0	0	0.166667	0.25	0.333333	0	0.4	0	0	0	0.333333	0	0.329545	0.233333	0.310167
Mariquina	1	0	1	0.25	0	0	0.25	0	0	0	0	0	0	1	0	0.340909	0.233333	0.31
Placilla	0.916667	0	0.9	0	1	0	0	0.333333	0	0	0	0	0	0	0	0.306818	0.21	0.309167
San Ramón	0.916667	0	1	0.666667	0	0.166667	0	0	0	0	0	0	0	0	0	0.340909	0.183333	0.2975
San Vicente	1	0	1	0	0	0.166667	0.125	0	0	0	0.666667	0	0.5	0	0	0.306818	0.230556	0.295833
Punitaqui	0.0833333	0	1	0	1	1	0.125	0	0	0	0	0	0	0.666667	0	0.295455	0.258333	0.295
Santa Juana	0.916667	0	1	0	0.166667	0	0	0.333333	0	0	0.666667	0	0	0.333333	0	0.295455	0.227778	0.2925
Ñuñoa	0.916667	0	1	0	0	0.166667	0.625	0.333333	0	0	0	0	0	0	0	0.318182	0.202778	0.288333
Chañaral	0.916667	0	1	0	0	0.166667	0.125	0	0	0.2	0	0	0.5	0.333333	0	0.295455	0.216111	0.281667
Pichidegua	0.916667	0	1	0.166667	0	0.166667	0.125	0	0	0	0	0	0	0.666667	0	0.306818	0.202778	0.281667
Quinchao	0.5	0	1	0	1	0	0.25	0.333333	0	0	0	0	0	0	0	0.284091	0.205556	0.28
Pemuco	0.0833333	0.1	1	0	1	0	0.125	0	0	0.6	0	0	0	1	0	0.284091	0.260556	0.279333
Pirque	0.0833333	0	1	0.416667	1	0.166667	0.25	0.333333	0	0	0	0	0	0	0	0.295455	0.216667	0.279167
Putre	0.416667	0.1	0.8	0.166667	0.5	0.833333	0.125	0	0	0.2	0	0	0	0	0	0.295455	0.209444	0.277667
Contulmo	0.583333	0	1	0	1	0	0	0.333333	0	0	0	0	0	0	0	0.272727	0.194444	0.275833
Curepto	0.916667	0	0.4	0	1	0	0.125	0	0	0	0	0	0	0.666667	0	0.272727	0.207222	0.273333
Lanco	0.0833333	0	1	0	1	0	0.375	0.333333	0	0	0	0	0	1	0	0.272727	0.252778	0.273333
Empedrado	0.916667	0	1	0	0	0	0	0	0	0	0.666667	0	0	0.666667	0	0.284091	0.216667	0.2725
San Carlos	0.916667	0	1	0	0	0	0.125	0	0	0	0	0	0	1	0	0.284091	0.202778	0.266667
Pumanque	0.583333	0	0.9	0	1	0	0	0.333333	0	0	0	0	0	0	0	0.261364	0.187778	0.265833
Tucapel	0.0833333	0	1	0.166667	1	0.833333	0	0	0	0	0	0	0	0	0	0.272727	0.205556	0.265833
San Ignacio	0.0833333	0	1	0.166667	1	0	0.125	0	0	0.6	0	0	0.5	0	0	0.272727	0.231667	0.265
Huasco	0.0833333	0.2	1	0	1	0.166667	0	0	0	0.2	0	0	0	0.666667	0	0.261364	0.221111	0.261167
Cauquenes	0.0833333	0	1	0	1	0	0.125	0.333333	0	0	0.666667	0	0	0.333333	0	0.25	0.236111	0.258333
Peumo	0.916667	0	1	0	0	0.166667	0.125	0.333333	0	0	0	0	0	0	0	0.272727	0.169444	0.258333
Quillón	0.0833333	0	1	0.583333	1	0	0.125	0	0	0	0	0	0	0	0	0.284091	0.186111	0.256667
Tocopilla	0.0833333	0	1	0	1	0	0	0	0	0	0.666667	0.5	0	0.333333	0	0.238636	0.238889	0.250833
Quilleco	0	0	1	0	1	0	0	0	0	0	0.666667	0	1	0	0	0.227273	0.244444	0.246667
San Miguel	0.0833333	0	1	0	1	0	0.375	0.333333	0	0	0	0	0	0.333333	0	0.25	0.208333	0.246667
Quinta De Tilcoco	0.916667	0	1	0	0	0.166667	0.25	0	0	0	0	0	0	0	0	0.272727	0.155556	0.245833
Quirihue	0.0833333	0	1	0.166667	1	0	0	0	0	0.2	0	0	0	0.666667	0	0.25	0.207778	0.244167
Vicuña	0.0833333	0	1	0	1	0	0	0	0	0.2	0	0	0	1	0	0.238636	0.218889	0.240833
Peralillo	0.916667	0	1	0	0	0	0.125	0	0	0	0	0	0	0.333333	0	0.261364	0.158333	0.24
Vallenar	0	0.3	1	0	1	0	0	0	0	0.2	0	0	0	0.333333	0	0.238636	0.188889	0.236333
Romeral	0	0	1	0	1	0.333333	0.125	0.333333	0	0	0	0	0	0	0	0.227273	0.186111	0.230833
Cobquecura	0.0833333	0.1	1	0.25	0	1	0	0	0	0	0	0	0	0.333333	0	0.25	0.184444	0.230167
Lampa	0.0833333	0	1	0	1	0.166667	0.125	0.333333	0	0	0	0	0	0	0	0.227273	0.180556	0.23
Colchane	0.916667	0	1	0	0	0	0	0	0	0.2	0	0	0	0	0	0.25	0.141111	0.229167
Las Cabras	0.916667	0	1	0	0	0	0	0	0	0.2	0	0	0	0	0	0.25	0.141111	0.229167
Monte Patria	0.0833333	0	1	0	1	0	0.125	0	0	0	0.666667	0	0	0	0	0.227273	0.191667	0.225
Caldera	0.0833333	0	1	0	0.166667	1	0.125	0	0	0.4	0	0	0	0	0	0.238636	0.185	0.221667
Tierra Amarilla	0.0833333	0	1	0	1	0	0	0	0	0.2	0	0	0.5	0	0	0.215909	0.185556	0.220833
Andacollo	0.0833333	0	0.9	0	1	0.166667	0	0	0	0	0.333333	0	0	0.333333	0	0.215909	0.187778	0.219167
Pencahue	0.916667	0	1	0	0	0	0	0	0	0	0	0	0	0	0	0.238636	0.127778	0.219167
Chaitén	0.0833333	0	1	0	1	0	0.125	0.333333	0	0	0	0	0	0	0	0.215909	0.169444	0.218333
Chile Chico	0.0833333	0	1	0	1	0	0.125	0.333333	0	0	0	0	0	0	0	0.215909	0.169444	0.218333
Máfil	0.0833333	0	1	0	1	0	0.125	0.333333	0	0	0	0	0	0	0	0.215909	0.169444	0.218333
Illapel	0.0833333	0	1	0	1	0	0	0	0	0	0.666667	0	0	0	0	0.215909	0.183333	0.2175
San Fabián	0.0833333	0	1	0	1	0	0	0	0	0	0	0	0	0.666667	0	0.215909	0.183333	0.2175
San Nicolás	0.0833333	0	1	0	1	0	0	0	0	0	0	0	0	0.666667	0	0.215909	0.183333	0.2175
Copiapó	0	0.1	0.9	0	1	0.166667	0.125	0	0	0	0	0	0	0.333333	0	0.215909	0.175	0.2135
Puerto Octay	0.0833333	0	1	0	1	0	0	0.333333	0	0	0	0	0	0	0	0.204545	0.161111	0.210833
Corral	0.5	0	0	0.333333	1	0.166667	0	0	0	0	0	0	0.5	0	0	0.204545	0.166667	0.21
Los Vilos	0	0	1	0	1	0	0	0	0	0	0	0	0	0.666667	0	0.204545	0.177778	0.206667
Combarbalá	0.0833333	0	1	0	1	0	0.25	0	0	0	0	0	0	0	0	0.215909	0.155556	0.205833
San Rosendo	0.0833333	0.1	1	0.416667	0	0	0	0	0	0	0	0	0	1	0	0.227273	0.173333	0.2035
La Higuera	0	0	1	0.0833333	1	0	0.25	0	0	0	0	0	0	0	0	0.215909	0.155556	0.203333
Timaukel	0.0833333	0	1	0	1	0	0.125	0	0	0	0	0	0	0	0	0.204545	0.147222	0.198333
Paiguano	0	0	1	0	1	0	0	0	0	0	0	0	0	0.333333	0	0.193182	0.155556	0.193333
Alto Biobío	0.0833333	0	1	0	1	0	0	0	0	0	0	0	0	0	0	0.193182	0.138889	0.190833
Freirina	0	0	1	0	1	0	0	0	0	0.2	0	0	0	0	0	0.193182	0.146667	0.19
Constitución	0	0	1	0	1	0	0.125	0	0	0	0	0	0	0	0	0.193182	0.141667	0.1875
Pozo Almonte	0	0	0.7	0	1	0.166667	0.125	0	0	0	0	0	0	0.333333	0	0.181818	0.155	0.1825
Requínoa	0.0833333	0	1	0	0	0.166667	0.125	0.333333	0	0	0.666667	0	0	0	0	0.181818	0.158333	0.176667
General Lagos	0.0833333	0	0.5	0	1	0.166667	0.125	0	0	0	0.333333	0	0	0	0	0.170455	0.147222	0.173333
María Elena	0.0833333	0	0.1	0.0833333	1	0	0.125	0	0	0	0.666667	0	0.5	0	0	0.147727	0.170556	0.163333
Treguaco	0.0833333	0	1	0	0	0.166667	0	0	0	0.2	0.666667	0	0	0	0	0.170455	0.141111	0.159167
Río Hurtado	0.0833333	0	1	0	0	0.166667	0.25	0.333333	0	0	0	0	0	0	0	0.170455	0.122222	0.1575
Camiña	0.666667	0	0.7	0	0	0	0	0	0	0	0	0	0	0	0	0.170455	0.0911111	0.156667
Canela	0.333333	0	1	0	0	0	0.125	0	0	0	0	0	0	0	0	0.170455	0.0972222	0.150833
Coihueco	0.0833333	0	1	0	0	0	0.125	0	0	0	0	0	0	0.666667	0	0.159091	0.125	0.145
Taltal	0.0833333	0	1	0	0	0.166667	0	0	0	0	0	0	0.5	0	0	0.147727	0.116667	0.1425
Huara	0.0833333	0	1	0	0	0	0.125	0	0	0.4	0	0	0	0	0	0.159091	0.107222	0.138333
Ñiquén	0.0833333	0	0.5	0	0	0.833333	0	0	0	0	0.333333	0	0	0	0	0.136364	0.116667	0.1325
Calama	0.166667	0	0.6	0	0	0	0	0	0	0.6	0	0	0.5	0	0	0.136364	0.124444	0.131667
Coelemu	0.0833333	0	1	0	0	0	0.125	0	0	0	0	0	0	0	0	0.136364	0.0805556	0.118333
Longaví	0	0	1	0.166667	0	0	0	0	0	0	0	0	0	0	0	0.136364	0.0777778	0.116667
Chillán Viejo	0.0833333	0	0.9	0	0	0	0	0	0	0	0	0	0	0	0	0.113636	0.0655556	0.100833
Ninhue	0	0	1	0	0	0	0	0	0	0	0	0	0	0	0	0.113636	0.0666667	0.1
Santa Cruz	0	0	0.9	0	0	0	0	0	0	0	0	0	0	0	0	0.102273	0.06	0.09
Ollagüe	0.0833333	0	0	0	0	0	0.125	0	0	0	0.666667	0	0	0	0	0.0454545	0.0583333	0.045
Alto Hospicio	0	0	0	0	0	0.166667	0.125	0	0	0	0	0	0	0	0	0.0227273	0.0194444	0.0191667
Calera De Tango	0	0	0	0.0833333	0	0	0	0	0	0	0	0	0	0	0	0.0113636	0.00555556	0.00833333

## Sheet: Indice Puntaje CF
Dimensión	Factor 1: Información de unidades municipales y funcionarios	Factor 2: Integración	Factor 3: Transparencia	Factor 4: Información Educacional y de Salud	Factor 5: Ley de Lobby	Factor 6: Concejo Comunal de Organizaciones de la Sociedad Civil (COSOC)	Factor 7: Beneficios, Deberes y Pagos	Factor 8: Contenido Informativo	Factor 9: Proyectos Comunales	Factor 10: Tramites Online	Factor 11: Valores	Factor 12: Consultas	Factor 13: Orientación	Factor 14: Medio Ambiente	Factor 15: Seguridad y Confiabilidad	Índice 4: Media CF considerando el mismo peso por dimensión	Índice 5: Media CF considerando el peso de la varianza total explicada		Total Variables	88
Carga Factorial	12	10	10	12	6	6	8	3	3	5	3	2	2	3	3				Total Prop Var.	1
Propor. Var. Total Explicada	0.13	0.11	0.1	0.1	0.08	0.07	0.06	0.06	0.05	0.05	0.04	0.04	0.04	0.04	0.03
Lo Barnechea	0.773167	0.730076	0.702467	0.616072	0.891616	0.7823	0.588817	0.435848	0.655312	0.457883	0	0	0	0.713709	0.258625	0.507059	0.592211
Las Condes	0.732192	0.730076	0.702467	0.616072	0.891616	0.7823	0.446926	0.171542	0	0.275418	0.613707	0	0	0.713709	0.258625	0.46231	0.545172
Santiago	0.732192	0.730076	0.702467	0.53337	0.891616	0.7823	0.446926	0.171542	0	0.632915	0	0	0	0.713709	0.101094	0.429214	0.525502
El Quisco	0.732192	0.565862	0.702467	0.513323	0.770808	0.643247	0.0628946	0.679137	0	0.134382	0.613707	0.24934	0.619932	0.438657	0.101094	0.455136	0.51684
San Antonio	0.773167	0.645473	0.702467	0.468815	0.770808	0.505503	0.210347	0.679137	0.417599	0.134382	0.613707	0	0	0.438657	0.101094	0.430744	0.511787
Peñaflor	0.773167	0.33268	0.646869	0.654552	0.891616	0.498657	0.0628946	0.414831	0.655312	0.134382	0.759332	0	0	0.459725	0.101094	0.425674	0.493427
Antofagasta	0.773167	0.730076	0.702467	0.156371	0.891616	0.7823	0.200001	0	0	0.632915	0.613707	0	0	0.529036	0.101094	0.407517	0.485182
Padre Las Casas	0.732192	0.518906	0.702467	0.319425	0.770808	0.50478	0.210347	0.679137	0.174083	0.234769	0.613707	0	0.319373	0.438657	0.101094	0.421316	0.483167
Quillota	0.773167	0.645473	0.702467	0.430621	0.770808	0.367036	0.535042	0.679137	0	0	0	0	0.300559	0.438657	0.101094	0.382937	0.477632
Quilicura	0.732192	0.730076	0.702467	0.654552	0.891616	0.0833926	0.446926	0.414831	0	0	0	0	0	0.713709	0.258625	0.375226	0.476375
Vitacura	0.732192	0.681656	0.702467	0.568364	0.891616	0.0833926	0.210347	0.171542	0	0.325404	0.613707	0	0	0.713709	0.258625	0.396868	0.474456
Casablanca	0.732192	0.587972	0.702467	0.485662	0.891616	0.368307	0.126731	0.171542	0.417599	0.234769	0	0	0	0.713709	0.101094	0.368911	0.457882
Futaleufú	0.732192	0.730076	0.702467	0.485662	0.891616	0.7823	0.126731	0.171542	0	0	0	0	0	0	0.536369	0.34393	0.454384
Pucón	0.732192	0.489041	0.702467	0.417554	0.770808	0.643247	0	0.679137	0.174083	0.134382	0	0	0.319373	0.253984	0.101094	0.361157	0.449812
Providencia	0.773167	0.730076	0.702467	0.616072	0	0.7823	0.535042	0.171542	0	0	0	0	0	0.713709	0.258625	0.3522	0.446137
Vilcún	0.594627	0.488531	0.702467	0.237837	0.770808	0.643247	0.0628946	0.679137	0.411797	0.134382	0.613707	0	0	0.438657	0	0.385206	0.445688
Curanilahue	0.732192	0.730076	0.702467	0.577878	0.891616	0.0833926	0	0.171542	0	0	0.613707	0	0	0.713709	0	0.347772	0.444084
San Felipe	0.732192	0.645473	0.702467	0.430621	0.770808	0.221859	0.210347	0.679137	0.174083	0.100386	0	0	0	0.459725	0	0.341806	0.442172
Villarrica	0.773167	0.359686	0.702467	0.306554	0.770808	0.497386	0.0628946	0.679137	0.174083	0.100386	0.613707	0	0	0.438657	0	0.365262	0.437801
Victoria	0.60425	0.645473	0.387548	0.237837	0.891616	0.7823	0	0.171542	0	0.225018	0.613707	0	0.319373	0.713709	0.378838	0.398081	0.436963
Aysén	0.732192	0.57504	0.702467	0.174383	0.770808	0.643247	0.0628946	0.679137	0.174083	0.100386	0.613707	0	0	0	0	0.348556	0.43561
La Cruz	0.523801	0.199215	0.64116	0.516809	0.891616	0.497386	0.17174	0.679137	0.174083	0.409801	0.613707	0	0	0.253984	0.101094	0.378236	0.429938
Gorbea	0.52847	0.50109	0.702467	0.475129	0.770808	0.50478	0.0628946	0.679137	0.174083	0	0	0	0.319373	0.438657	0.101094	0.350532	0.42516
San Javier	0.732192	0.681656	0.702467	0.475795	0.891616	0.0833926	0.0628946	0.171542	0	0	0.613707	0	0	0.529036	0	0.32962	0.424936
La Cisterna	0.732192	0.730076	0.702467	0.53337	0.891616	0.0833926	0.199993	0.171542	0	0	0	0	0	0.438657	0.258625	0.316129	0.423841
Cabildo	0.60252	0.350295	0.702467	0.383644	0.891616	0.221175	0	0.679137	0.174083	0.54228	0	0.262182	0	0.438657	0	0.34987	0.416883
Chiguayante	0.732192	0.730076	0.702467	0	0.891616	0.0833926	0.180213	0.171542	0	0.134382	0.613707	0	0.319373	0.713709	0	0.351511	0.416603
Peñalolén	0.732192	0.681656	0.702467	0.53337	0.891616	0.0833926	0.180213	0.171542	0	0	0.613707	0	0	0	0	0.30601	0.416571
Santo Domingo	0.732192	0.413616	0.702467	0.252933	0.587555	0.497386	0.0628946	0.414831	0	0.367247	0.759332	0	0	0.438657	0.101094	0.355347	0.416022
Quilpué	0.773167	0.347064	0.702467	0.095769	0.770808	0.498657	0.263829	0.679137	0.174083	0	0	0	0.319373	0.438657	0.101094	0.344274	0.413719
San Joaquín	0.732192	0.681656	0.702467	0.225122	0.891616	0.7823	0.210347	0.171542	0	0	0	0	0	0	0	0.293149	0.41193
Huechuraba	0.732192	0	0.702467	0.577878	0.891616	0.7823	0.180213	0.171542	0	0	0.299105	0	0	0.713709	0	0.336735	0.410928
Pitrufquén	0.60282	0.341318	0.702467	0.314881	0.891616	0.497386	0.0628946	0.679137	0.174083	0	0	0	0.319373	0.438657	0.101094	0.341715	0.410373
Panquehue	0.605003	0.33268	0.702467	0.320539	0.770808	0.505464	0	0.679137	0.174083	0	0.613707	0	0.319373	0.184673	0	0.347196	0.408755
Zapallar	0.732192	0.200611	0.702467	0.485662	0.770808	0.0833926	0.210347	0.679137	0.174083	0.409801	0	0	0	0.459725	0.101094	0.333954	0.407552
Teodoro Schmidt	0.70747	0.503879	0.702467	0.237837	0.770808	0.359604	0	0	0.417599	0	0.613707	0	0.319373	0.438657	0.101094	0.344833	0.407047
Nueva Imperial	0.605003	0.424269	0.702467	0.234235	0.770808	0.359604	0.0628946	0.679137	0	0.134382	0.613707	0	0.319373	0.184673	0.101094	0.34611	0.404811
Machalí	0.732192	0.681656	0.702467	0.485662	0	0.7823	0.210347	0	0	0.407897	0.613707	0	0	0	0.101094	0.314488	0.404338
Temuco	0.773167	0.50109	0.702467	0.516809	0	0.360913	0.210347	0.679137	0.174083	0.275418	0	0	0	0.438657	0.258625	0.326047	0.403972
Loncoche	0.668518	0.342824	0.702467	0.280652	0.624687	0.506051	0.0628946	0.679137	0.411797	0	0	0	0.319373	0.438657	0	0.335804	0.403761
Limache	0.593594	0.50109	0.702467	0.323843	0.770808	0.359642	0.0628946	0.679137	0.174083	0.134382	0	0.24934	0	0.184673	0.101094	0.32247	0.402096
Mostazal	0.732192	0.730076	0.702467	0.430621	0.891616	0	0.126731	0.171542	0	0	0	0	0	0.184673	0.536369	0.300419	0.401506
Coyhaique	0.773167	0.434898	0.702467	0.218891	0.770808	0.497386	0.0628946	0.679137	0	0.134382	0.314602	0	0	0	0	0.305909	0.400793
Punta Arenas	0.732192	0.273474	0.702467	0.342738	0.770808	0.505464	0.234634	0.414831	0	0.409801	0	0	0	0.253984	0.101094	0.316099	0.399485
Los Sauces	0.645977	0.346938	0.702467	0.237837	0.770808	0.359604	0.0628946	0.679137	0.174083	0	0	0	0.619932	0.438657	0	0.335889	0.398577
Santa Bárbara	0.773167	0.267398	0.702467	0.193132	0.891616	0.7823	0.180213	0	0	0	0.613707	0	0	0.438657	0	0.322844	0.398483
Paine	0.732192	0.04842	0.702467	0.371035	0.891616	0.7823	0.0628946	0.171542	0	0	0.613707	0	0	0.438657	0.258625	0.33823	0.397871
Lonquimay	0.665307	0.343334	0.702467	0.285163	0.770808	0.497386	0.0534826	0.679137	0.411797	0	0	0	0.319373	0	0	0.315217	0.396823
Algarrobo	0.687847	0.417856	0.702467	0.402108	0.891616	0.366998	0.0628946	0	0	0.100386	0.613707	0	0	0.438657	0.101094	0.319042	0.396781
Olmué	0.60252	0.518906	0.702467	0.455158	0.770808	0.137783	0	0.414831	0.174083	0	0.314602	0	0.619932	0	0	0.314073	0.393454
Iquique	0.732192	0.550096	0.498	0.197702	0.891616	0.498657	0.116377	0	0	0.441894	0.613707	0	0	0	0.258625	0.319924	0.392885
Ránquil	0.592144	0.076821	0.702467	0.296131	0.891616	0.7823	0.0628946	0	0	0.40005	0.613707	0	0	0.713709	0.101094	0.348862	0.391285
La Reina	0.732192	0.342824	0.702467	0	0.891616	0.7823	0.481559	0.171542	0	0	0	0	0	0.438657	0.101094	0.309617	0.388998
Valdivia	0.732192	0.04842	0.702467	0.470585	0.891616	0.7823	0.126731	0.171542	0	0	0.613707	0	0	0	0	0.302637	0.386351
Curacautín	0.732192	0.408106	0.620689	0.282345	0.624687	0.359604	0.0628946	0.414831	0.174083	0	0.613707	0	0	0.438657	0	0.315453	0.384989
Angol	0.60298	0.150795	0.702467	0.306554	0.891616	0.643247	0.0628946	0	0.174083	0.134382	0.613707	0	0	0.713709	0	0.333096	0.384527
San Esteban	0.605003	0.344729	0.702467	0.359021	0.770808	0.221137	0	0.414831	0.174083	0.357497	0.314602	0	0.319373	0.184673	0	0.317882	0.384078
Traiguén	0.604091	0.424269	0.620689	0.24109	0.770808	0.36772	0.210347	0.679137	0.174083	0	0	0	0	0.438657	0.101094	0.308799	0.381437
Cunco	0.773167	0.518906	0.702467	0.129894	0.624687	0.0833926	0.0628946	0.414831	0	0.100386	0.613707	0	0.319373	0.253984	0.101094	0.313252	0.380838
La Ligua	0.732192	0.255349	0.702467	0.216097	0.770808	0.359604	0.0628946	0.414831	0.174083	0.407897	0	0	0	0.184673	0.378838	0.310649	0.378481
Litueche	0.732192	0	0.702467	0.419171	0.891616	0.7823	0.0628946	0.171542	0	0	0	0	0	0.713709	0	0.298393	0.376054
Papudo	0.533425	0.358877	0.702467	0.551803	0.624687	0.221175	0	0.414831	0.174083	0	0.613707	0	0	0.438657	0	0.308914	0.375394
Ancud	0.732192	0.730076	0.702467	0	0.891616	0.0833926	0.210347	0.171542	0	0	0	0	0	0.713709	0	0.282356	0.374368
La Florida	0.732192	0.730076	0.702467	0	0.891616	0.0833926	0.393443	0.171542	0	0	0	0	0	0.438657	0	0.276226	0.374352
Cartagena	0.732192	0.04842	0.702467	0.120113	0.770808	0.359642	0.116377	0.679137	0.174083	0	0.613707	0.262182	0	0.253984	0.101094	0.328947	0.374271
Concón	0.553507	0.436582	0.447764	0.411641	0.891616	0.137783	0	0.679137	0	0.100386	0.613707	0	0.319373	0	0.101094	0.312839	0.373018
San Fernando	0.732192	0.730076	0.702467	0.0664915	0.891616	0.0833926	0.0628946	0.171542	0	0	0	0	0	0.713709	0	0.276959	0.37217
Melipeuco	0.316127	0.407596	0.702467	0.111196	0.770808	0.35892	0	0.679137	0.174083	0.309415	0.613707	0	0.319373	0.184673	0.277744	0.34835	0.372053
San Clemente	0.732192	0	0.702467	0.654552	0.891616	0	0.0628946	0	0	0	0.613707	0	0.319373	0.713709	0	0.312701	0.371861
Valparaíso	0.436498	0.434303	0.702467	0.353807	0.891616	0.229253	0.14651	0	0.417599	0.441894	0	0.24934	0	0.184673	0.101094	0.305937	0.369681
Los Ángeles	0.732192	0.294404	0.702467	0	0.891616	0.7823	0	0.171542	0	0	0.613707	0	0	0.253984	0	0.296148	0.368907
Purén	0.602361	0.277942	0.702467	0.126641	0.770808	0.643247	0	0.679137	0	0	0	0	0.300559	0.438657	0	0.302788	0.3688
Maipú	0.732192	0.342824	0.702467	0	0.891616	0.0833926	0.210347	0.171542	0	0.54228	0.613707	0	0	0.253984	0.101094	0.309696	0.368077
La Unión	0.732192	0.04842	0.702467	0.485662	0.891616	0.0833926	0.126731	0.171542	0	0	0.613707	0	0	0.713709	0	0.304629	0.367484
Perquenco	0.53036	0.266003	0.702467	0.237837	0.624687	0.366998	0.0534826	0.679137	0.174083	0	0.613707	0	0	0.438657	0.101094	0.319234	0.365691
Osorno	0.773167	0	0.702467	0.0664915	0.891616	0.7823	0.126731	0.171542	0	0.232865	0.613707	0	0	0.184673	0	0.303037	0.364973
Putaendo	0.597852	0.424269	0.702467	0.408637	0.891616	0.137783	0	0.414831	0.174083	0.134382	0	0	0	0.184673	0	0.271373	0.364175
Saavedra	0.70874	0.158267	0.702467	0.123039	0.770808	0.359604	0	0.679137	0	0	0	0	0.319373	0.713709	0.101094	0.309082	0.364037
Collipulli	0.732192	0.282056	0.702467	0.126641	0.770808	0.359642	0	0.414831	0.174083	0.134382	0.613707	0	0	0	0.101094	0.294127	0.363856
Lautaro	0.732192	0.0667876	0.702467	0.304544	0.770808	0.221175	0.263829	0.414831	0	0.234769	0	0	0.319373	0.438657	0	0.297962	0.363159
Los Muermos	0.732192	0	0.702467	0.485662	0.891616	0.0833926	0.126731	0.171542	0	0	0.613707	0	0	0.713709	0	0.301401	0.362158
Los Andes	0.732192	0.140142	0.702467	0.561031	0.770808	0.359642	0.126731	0	0	0.134382	0	0	0.319373	0.184673	0.101094	0.275502	0.361308
Puerto Montt	0.732192	0	0.702467	0.568364	0.891616	0.0833926	0.263829	0.171542	0	0.132479	0	0	0	0.713709	0	0.283973	0.360729
Santa María	0.466405	0.129356	0.64116	0.39055	0.770808	0.643247	0	0.679137	0	0.134382	0	0	0	0.438657	0.101094	0.292986	0.352771
El Tabo	0.666495	0.50109	0.702467	0.180262	0.624687	0.0833926	0.199993	0.679137	0	0	0	0	0	0.253984	0.101094	0.266173	0.35179
Hualqui	0.732192	0.681656	0.702467	0	0.891616	0.0833926	0.126731	0.171542	0	0.325404	0	0	0	0	0	0.247667	0.351747
Hijuelas	0.709652	0.150795	0.64116	0.513323	0.770808	0.0833926	0	0.414831	0	0.134382	0	0	0.619932	0	0.101094	0.275958	0.351232
Chillán	0.732192	0.730076	0.702467	0	0.891616	0	0.0628946	0	0	0	0	0	0	0.713709	0	0.25553	0.349391
Ercilla	0.466685	0.199215	0.702467	0.193132	0.770808	0.359604	0	0.679137	0.243516	0	0.613707	0	0.319373	0	0	0.303176	0.349227
Cerrillos	0.773167	0	0.702467	0	0.891616	0.7823	0.210347	0.171542	0	0.0906352	0.613707	0	0	0	0	0.282385	0.348842
Cholchol	0.530539	0.199215	0.702467	0.111196	0.770808	0.50478	0	0.679137	0.174083	0.134382	0	0	0.319373	0.253984	0	0.291998	0.348355
Guaitecas	0.595324	0.33268	0.702467	0.174383	0.617535	0.359642	0	0.679137	0	0	0	0	0.319373	0.438657	0	0.28128	0.347319
Viña Del Mar	0.521319	0.123846	0.702467	0	0.770808	0.366998	0.210347	0.679137	0	0.275418	0	0	0.300559	0.438657	0.378838	0.317893	0.347069
El Bosque	0.773167	0	0.702467	0.304544	0.891616	0.0833926	0.0628946	0.171542	0	0	0.613707	0	0	0.713709	0	0.287803	0.345542
Tiltil	0.732192	0.387252	0.702467	0	0.891616	0.7823	0	0.171542	0	0	0	0	0	0	0	0.244491	0.344412
Purranque	0.732192	0	0.702467	0.237837	0.891616	0.698908	0.126731	0.171542	0	0	0	0	0	0	0.536369	0.273177	0.343456
Villa Alemana	0.709492	0.332226	0.702467	0.409229	0	0.221175	0.0628946	0.679137	0.174083	0.275418	0	0	0	0.438657	0.101094	0.273725	0.343007
Freire	0.532232	0.04842	0.702467	0.342523	0.770808	0.366998	0.0628946	0.264305	0	0	0.613707	0	0.319373	0.438657	0	0.297492	0.340871
San Juan De La Costa	0.773167	0.342824	0.702467	0.430621	0.891616	0	0.116377	0.171542	0	0	0	0	0	0	0	0.228574	0.340136
Coinco	0.732192	0	0.702467	0.238557	0.891616	0.0833926	0.535042	0.171542	0	0.367247	0	0	0.319373	0	0	0.269429	0.339986
Vichuquén	0.732192	0	0.702467	0.192784	0.891616	0.7823	0	0.171542	0	0.132479	0	0	0	0.253984	0	0.257291	0.337876
Licantén	0.732192	0	0.702467	0.654552	0.891616	0.0833926	0.0836159	0	0	0	0.613707	0	0	0	0	0.25077	0.337619
San Bernardo	0.732192	0	0.702467	0	0.891616	0.7823	0.0628946	0.171542	0	0	0.613707	0	0	0.184673	0	0.276093	0.337523
Lumaco	0.604091	0.418139	0.702467	0.237837	0.460475	0.643247	0.0534826	0.414831	0.174083	0	0	0	0	0	0	0.247243	0.337226
Independencia	0.732192	0	0.702467	0.473785	0.891616	0.0833926	0.126731	0.171542	0	0	0	0	0	0.713709	0	0.259696	0.336422
Puchuncaví	0.668518	0.426548	0.226768	0.222196	0.770808	0.0833926	0.116377	0.679137	0	0.234769	0	0	0.319373	0.438657	0	0.279103	0.336017
Arauco	0.732192	0	0.702467	0	0.891616	0.7823	0.0628946	0.171542	0	0	0.759332	0	0	0	0	0.27349	0.335961
Renca	0.732192	0	0.702467	0.485662	0.891616	0.0833926	0.263829	0.171542	0	0	0	0	0	0.438657	0	0.251291	0.334833
Puente Alto	0.732192	0	0.702467	0.430621	0.891616	0	0.334107	0.171542	0	0	0.613707	0	0	0	0	0.258417	0.33471
Paillaco	0.732192	0	0.702467	0.247105	0.891616	0.0833926	0.0628946	0.171542	0	0	0.613707	0	0	0.713709	0	0.281242	0.334472
Fresia	0.732192	0	0.702467	0	0.891616	0.7823	0.126731	0.171542	0	0	0.613707	0	0	0	0	0.268037	0.333967
Hualpén	0.687847	0	0.702467	0.616072	0.891616	0	0.14651	0.171542	0	0	0	0	0	0.529036	0	0.249673	0.332848
Curicó	0.732192	0	0.702467	0.286265	0.891616	0.0833926	0.263829	0.171542	0	0	0.613707	0	0	0.253984	0	0.2666	0.332055
Futrono	0.668518	0	0.702467	0	0.891616	0.7823	0.14651	0.171542	0	0	0	0	0	0.713709	0	0.271778	0.330876
Cañete	0.732192	0	0.702467	0.485662	0.891616	0.0833926	0	0.171542	0	0	0	0	0	0.713709	0	0.252039	0.330006
Rinconada	0.60252	0.565862	0.586011	0.210745	0.770808	0.643247	0	0	0	0	0	0	0	0	0.101094	0.232019	0.329973
Rengo	0.773167	0	0.702467	0.35832	0.891616	0	0.0628946	0.171542	0	0	0.613707	0	0.319373	0	0	0.259539	0.329309
San José De Maipo	0.732192	0	0.702467	0.0550414	0.891616	0.0833926	0.263829	0.171542	0	0.232865	0.613707	0	0	0.438657	0	0.279021	0.327963
Colina	0.732192	0	0.702467	0.364129	0.891616	0	0.481559	0.171542	0	0.134382	0	0	0	0.184673	0	0.244171	0.326466
Quintero	0.702341	0.04842	0.620689	0.0575748	0.624687	0.366998	0	0.679137	0.174083	0.309415	0	0	0	0.438657	0.101094	0.274873	0.325624
Antuco	0.732192	0	0.702467	0	0.891616	0.7823	0.210347	0.171542	0	0	0	0	0	0.253984	0	0.24963	0.324595
Macul	0.732192	0	0.702467	0	0.891616	0.7823	0.210347	0.171542	0	0	0	0	0	0.253984	0	0.24963	0.324595
Talagante	0.732192	0.387252	0.702467	0.241268	0.891616	0.0833926	0.0628946	0.171542	0	0	0	0	0	0	0	0.218175	0.323389
Sierra Gorda	0.732192	0.04842	0.702467	0.415479	0.891616	0	0.0628946	0	0	0.498532	0	0	0	0.275052	0	0.241777	0.323337
Estación Central	0.773167	0	0.702467	0.231223	0.891616	0.0833926	0.481559	0.171542	0	0.0906352	0	0	0	0.184673	0	0.240685	0.322152
Puerto Varas	0.773167	0	0.702467	0	0.891616	0.7823	0.210347	0.171542	0	0	0	0	0	0	0	0.235429	0.319762
Paredones	0.732192	0	0.702467	0.179914	0.891616	0.0833926	0	0.171542	0	0	0.613707	0	0	0.529036	0.101094	0.266997	0.319625
Nancagua	0.668677	0.730076	0.702467	0	0.891616	0	0	0.171542	0	0	0	0	0	0	0	0.210959	0.319105
Frutillar	0.732192	0.04842	0.702467	0.247105	0.891616	0.0833926	0.126731	0.171542	0	0	0	0	0	0.713709	0	0.247812	0.31908
Rancagua	0.732192	0	0.702467	0	0.891616	0.0833926	0.263829	0.171542	0	0.632915	0	0	0	0.438657	0	0.261107	0.317913
Lolol	0.732192	0	0.702467	0.451586	0.891616	0	0	0.171542	0	0	0.613707	0	0	0	0	0.237541	0.31676
Galvarino	0.521299	0.266003	0.702467	0.0536212	0.770808	0.35892	0	0.679137	0.174083	0	0	0	0	0.184673	0	0.247401	0.316266
Los Álamos	0.732192	0	0.702467	0	0.891616	0.415303	0	0.171542	0	0.100386	0.613707	0	0	0.253984	0	0.258747	0.315852
Lo Espejo	0.732192	0	0.702467	0.310508	0.891616	0	0.210347	0.171542	0	0	0.613707	0	0	0	0	0.242159	0.315273
Salamanca	0.732192	0	0.702467	0.0634537	0.891616	0.7823	0	0.171542	0	0.134382	0	0	0	0	0	0.231864	0.314879
Quemchi	0.732192	0.04842	0.702467	0.485662	0.891616	0.0833926	0.126731	0.171542	0	0	0	0	0	0	0	0.216135	0.314387
Calera	0.521319	0.115208	0.702467	0.111196	0.770808	0.643834	0.0628946	0	0.174083	0	0	0	0.300559	0.529036	0	0.262094	0.314205
Pedro Aguirre Cerda	0.732192	0	0.702467	0.53337	0.891616	0.0833926	0.126731	0.171542	0	0	0	0	0	0	0	0.216087	0.313832
Curarrehue	0.58155	0.0754256	0.702467	0.193348	0.770808	0.35892	0	0.679137	0	0	0	0	0.319373	0	0	0.245402	0.313792
Lo Prado	0.732192	0	0.702467	0	0.891616	0.7823	0.146518	0.171542	0	0	0	0	0	0	0.101094	0.235182	0.313638
Concepción	0.732192	0	0.702467	0	0.891616	0.0833926	0.210347	0.171542	0	0.225018	0.613707	0	0	0.253984	0	0.258951	0.31147
Florida	0.732192	0	0.702467	0	0.891616	0.0833926	0.210347	0.171542	0	0	0.613707	0	0	0.529036	0	0.262287	0.311222
La Estrella	0.732192	0	0.702467	0	0.891616	0.0833926	0.0628946	0.171542	0	0	0.613707	0	0	0.713709	0	0.264768	0.309761
Cabo De Hornos	0.604091	0.196143	0.702467	0.111196	0.770808	0.359604	0	0.414831	0.174083	0	0	0	0	0.184673	0	0.234526	0.309292
Talcahuano	0.732192	0.04842	0.702467	0.0575748	0.891616	0.422072	0.0628946	0.171542	0	0	0	0	0	0.438657	0	0.235162	0.309002
Ovalle	0.732192	0	0.702467	0	0.891616	0.0833926	0.0628946	0	0	0.532529	0.613707	0	0	0.253984	0	0.258185	0.307706
Curacaví	0.732192	0	0.702467	0	0.891616	0.7823	0.0628946	0.171542	0	0	0	0	0	0	0	0.222867	0.305588
Juan Fernández	0.515393	0.0667876	0.475699	0.365576	0.624687	0	0	0.679137	0	0	0.613707	0.262182	0	0.529036	0	0.27548	0.305395
Queilén	0.732192	0	0.702467	0	0.891616	0.0833926	0.126731	0.171542	0	0	0	0	0	0.713709	0.536369	0.263868	0.305134
La Pintana	0.773167	0.04842	0.702467	0.302362	0.891616	0.0833926	0.126731	0.171542	0	0	0	0	0	0	0.101094	0.213386	0.304417
Nogales	0.321688	0	0.702467	0.183515	0.770808	0.359604	0	0.679137	0	0	0.613707	0	0.319373	0.184673	0	0.275665	0.302713
La Granja	0.732192	0	0.702467	0.247105	0.891616	0	0.210347	0.171542	0	0	0	0	0	0.438657	0	0.226262	0.301931
Pinto	0.773167	0	0.702467	0	0.891616	0	0	0	0	0.134382	0.613707	0	0	0.713709	0	0.25527	0.301903
Chimbarongo	0.732192	0.342824	0.702467	0.0634537	0.891616	0	0	0.171542	0	0	0	0	0	0.253984	0	0.210539	0.301269
Mulchén	0.732192	0	0.702467	0	0.891616	0.0833926	0.210347	0.171542	0	0	0.613707	0	0	0.253984	0	0.24395	0.300219
Calle Larga	0.138138	0.192539	0.702467	0.464271	0.624687	0.0833926	0.0628946	0.679137	0	0.234769	0	0	0.619932	0.184673	0	0.265793	0.300068
Coquimbo	0.732192	0	0.702467	0.219094	0.891616	0.0833926	0.0628946	0	0	0.134382	0.613707	0	0	0	0	0.229316	0.299549
Malloa	0.732192	0	0.702467	0.485662	0.891616	0.0833926	0.126731	0	0	0	0	0	0	0	0	0.201471	0.298768
Rauco	0.732192	0	0.702467	0	0.891616	0.7823	0.116377	0	0	0	0	0	0	0	0	0.214997	0.298505
Carahue	0.533265	0.271459	0.702467	0.0536212	0	0.421388	0	0.679137	0	0	0	0	0.619932	0.713709	0	0.266332	0.298385
Tomé	0.732192	0.294404	0.702467	0	0	0	0.116669	0.679137	0	0	0.613707	0.262182	0	0.438657	0	0.255961	0.298146
Arica	0.70747	0	0.524614	0.111196	0.891616	0.221859	0.199993	0	0	0	0.759332	0	0	0.253984	0.101094	0.251411	0.297977
Padre Hurtado	0.666495	0.190577	0.447764	0.111196	0.891616	0.221859	0.0534826	0.414831	0	0.134382	0	0	0.319373	0	0	0.230105	0.297956
Villa Alegre	0.732192	0	0.702467	0.17185	0.891616	0	0.0628946	0.171542	0	0.0906352	0.613707	0	0	0	0	0.229127	0.297092
Chépica	0.668518	0	0.702467	0.352756	0.891616	0.0833926	0	0.171542	0	0.0906352	0	0	0	0.253984	0	0.214327	0.29458
Toltén	0.0656973	0.228126	0.702467	0.111196	0.770808	0.643247	0	0.679137	0.174083	0	0	0	0.319373	0.253984	0	0.263208	0.294079
Yerbas Buenas	0.732192	0	0.702467	0.170781	0.891616	0.0833926	0	0.171542	0	0	0	0	0.319373	0.253984	0	0.22169	0.292903
O'Higgins	0.468135	0	0.620689	0.333061	0.770808	0.359604	0	0.414831	0	0.134382	0	0	0	0.438657	0	0.236011	0.292225
Puyehue	0.732192	0	0.702467	0.304328	0.891616	0	0.14651	0.171542	0	0	0	0	0	0	0.157531	0.207079	0.291003
San Gregorio	0.110042	0.294404	0.702467	0.174383	0.770808	0.359604	0	0.679137	0.174083	0	0	0	0.319373	0.184673	0	0.251265	0.290826
Río Verde	0.42379	0.225054	0.702467	0.22477	0.770808	0.221859	0	0.679137	0	0	0	0	0	0	0	0.216526	0.290515
Nacimiento	0.732192	0	0.702467	0	0.891616	0.0833926	0.210347	0.171542	0	0	0.613707	0	0	0	0	0.227018	0.29006
Coronel	0.732192	0	0.702467	0	0.891616	0.0833926	0.126731	0.171542	0	0.132479	0	0	0	0.529036	0	0.22463	0.28828
Calbuco	0.732192	0	0.702467	0	0.891616	0	0.210347	0.171542	0	0	0	0	0	0.713709	0	0.228125	0.288223
Melipilla	0.732192	0	0.702467	0	0.891616	0.0833926	0.210347	0.171542	0	0.100386	0	0	0	0.438657	0	0.22204	0.288077
Río Negro	0.732192	0	0.702467	0.0595854	0.891616	0.0833926	0.0628946	0.171542	0	0	0.314602	0	0.319373	0	0	0.222511	0.287982
Laja	0.687847	0	0.702467	0.238557	0.891616	0	0.210347	0.171542	0	0	0	0	0	0.253984	0	0.210424	0.287924
La Serena	0.687847	0	0.702467	0	0.891616	0	0.0628946	0	0	0	0.613707	0	0	0.713709	0	0.244816	0.287866
Teno	0.732192	0	0.702467	0.183515	0.891616	0	0.0628946	0	0	0	0	0	0	0.713709	0	0.219093	0.287435
Olivar	0.732192	0	0.702467	0	0.891616	0.0833926	0.0628946	0.171542	0	0	0	0	0.319373	0.438657	0	0.226809	0.286986
El Monte	0.732192	0	0.702467	0.126292	0.891616	0.0833926	0.0628946	0.171542	0	0	0	0	0	0.438657	0	0.213937	0.28684
Linares	0.732192	0	0.702467	0.35832	0.891616	0	0.0628946	0.171542	0	0	0	0	0	0	0	0.194602	0.286659
Puqueldón	0.732192	0	0.702467	0	0.891616	0.0833926	0.0638361	0.171542	0	0	0	0	0	0.713709	0	0.223917	0.28527
Palena	0.732192	0	0.702467	0	0.891616	0.0833926	0.0628946	0.171542	0	0	0	0	0	0.713709	0	0.223854	0.285213
Colbún	0.773167	0	0.702467	0.192784	0.891616	0.0833926	0	0	0	0	0	0	0	0.438657	0	0.205472	0.28475
Cochrane	0.46802	0	0.64116	0.0536212	0.624687	0.359604	0	0.679137	0.174083	0.134382	0	0.24934	0.319373	0	0	0.246894	0.284388
Los Lagos	0.732192	0	0.702467	0	0.891616	0	0.126731	0.171542	0	0	0	0	0	0.713709	0	0.22255	0.283206
Renaico	0.605003	0.12379	0.646869	0	0.770808	0.497386	0	0.243289	0	0	0	0	0.319373	0	0	0.213768	0.280808
Porvenir	0.773167	0	0.702467	0	0.891616	0	0.0628946	0.171542	0	0	0.613707	0	0	0	0	0.21436	0.280702
San Pedro	0.732192	0	0.702467	0.296131	0.891616	0	0.0628946	0.171542	0	0	0	0	0	0	0	0.190456	0.28044
Pelarco	0.732192	0	0.702467	0	0.891616	0	0.0628946	0	0	0.0906352	0	0	0.319373	0.529036	0	0.221881	0.279003
Cabrero	0.732192	0	0.702467	0	0.891616	0	0.210347	0.171542	0	0	0	0	0	0.438657	0	0.209788	0.277221
Pudahuel	0.732192	0	0.702467	0.123039	0.891616	0	0.210347	0.171542	0	0.100386	0	0	0	0	0	0.195439	0.276998
Retiro	0.732192	0	0.702467	0.0667069	0.891616	0.0833926	0	0.171542	0	0.0906352	0	0	0.319373	0	0	0.203862	0.276868
Codegua	0.732192	0	0.702467	0.0664915	0.891616	0.0833926	0.126731	0.171542	0	0.132479	0	0	0	0	0.101094	0.200534	0.276801
Catemu	0.773167	0	0.702467	0.126641	0.770808	0.0833926	0	0.414831	0	0	0	0	0	0	0	0.19142	0.275814
Graneros	0.732192	0	0.702467	0	0.891616	0	0.0628946	0.171542	0	0	0.613707	0	0	0	0	0.211628	0.275375
Diego De Almagro	0.732192	0.142157	0.702467	0.129945	0.891616	0	0.0534826	0	0	0.134382	0	0	0	0	0	0.18575	0.275321
Panguipulli	0.687847	0	0.702467	0	0.891616	0	0.126731	0	0	0	0	0	0	0.713709	0.258625	0.2254	0.274907
Yumbel	0.687847	0	0.702467	0.126641	0.891616	0	0	0	0	0.132479	0.613707	0	0	0	0	0.210317	0.274832
Hualaihué	0.667765	0	0.702467	0	0.891616	0	0.126731	0.171542	0	0	0	0	0	0.713709	0	0.218255	0.27483
San Pedro De Atacama	0.732192	0	0.702467	0.0664915	0.891616	0	0.0628946	0	0	0.309415	0.299105	0	0	0	0	0.204279	0.274619
Natales	0.732192	0.04842	0.702467	0	0.891616	0	0.0628946	0	0	0	0	0	0	0.713709	0	0.210087	0.274409
Recoleta	0.732192	0	0.702467	0.286265	0	0.7823	0.210347	0	0	0	0	0	0.319373	0	0	0.202196	0.274215
Tortel	0.58155	0.203456	0.702467	0.0631871	0.314354	0.221859	0.0534826	0.679137	0	0	0	0	0	0.253984	0	0.204898	0.269342
Isla de Maipo	0.387516	0.190577	0.45646	0.124066	0.587555	0.423381	0.0994729	0	0	0.225018	0	0.24934	0.619932	0.275052	0	0.242558	0.269026
Conchalí	0.668677	0	0.702467	0.126641	0.891616	0.0833926	0.0628946	0.171542	0	0	0	0	0	0	0.258625	0.197724	0.268831
Pichilemu	0.732192	0	0.702467	0	0.891616	0	0.0628946	0.171542	0	0	0	0	0	0.438657	0	0.199958	0.268373
Maule	0.732192	0	0.64116	0	0.891616	0	0.0628946	0	0.655312	0	0	0	0	0	0	0.198878	0.26717
Molina	0.732192	0	0.702467	0	0.891616	0.0833926	0.0628946	0.171542	0	0	0	0	0	0.253984	0	0.193206	0.266824
Río Bueno	0.732192	0	0.702467	0	0.891616	0.0833926	0.210347	0.171542	0	0	0	0	0	0	0	0.186104	0.265512
Yungay	0.732192	0	0.702467	0	0.891616	0	0	0	0	0	0	0	0	0.713709	0	0.202666	0.265309
Doñihue	0.732192	0	0.702467	0	0.891616	0	0.126731	0.171542	0	0	0	0	0	0.253984	0	0.191902	0.264817
Alto Del Carmen	0.732192	0.142157	0.702467	0.123039	0.891616	0	0	0	0	0	0	0	0	0	0	0.172765	0.264702
Navidad	0.732192	0	0.702467	0	0.891616	0.0833926	0	0.171542	0	0	0	0	0	0.275052	0	0.190417	0.263893
Alhué	0.732192	0	0.702467	0	0.891616	0	0.0628946	0.171542	0	0	0	0	0.319373	0	0	0.192006	0.263602
Río Claro	0.732192	0	0.702467	0	0.891616	0.0833926	0	0.171542	0	0	0	0	0	0.253984	0	0.189013	0.26305
Lebu	0.732192	0	0.702467	0	0.891616	0	0.0836159	0.171542	0	0	0	0	0	0.253984	0	0.189028	0.26223
Palmilla	0.732192	0	0.64116	0	0.891616	0	0	0.171542	0	0	0	0	0	0.529036	0	0.197703	0.262084
Laguna Blanca	0.468135	0	0.702467	0.180262	0.471414	0.359604	0.147452	0.679137	0	0	0	0	0	0	0	0.200565	0.261611
Negrete	0.732192	0	0.702467	0	0.891616	0	0.0628946	0.171542	0	0	0	0	0	0.253984	0	0.187646	0.260987
Pelluhue	0.732192	0	0.702467	0	0.891616	0	0.0628946	0.171542	0	0	0	0	0	0.253984	0	0.187646	0.260987
Camarones	0.118236	0.04842	0.702467	0.237273	0.891616	0.360913	0.0628946	0	0	0.309415	0.759332	0	0	0	0	0.232704	0.260882
Torres Del Paine	0.668518	0	0.702467	0	0.891616	0	0.0628946	0	0	0	0	0	0	0.713709	0	0.202614	0.260805
Coltauco	0.732192	0	0.702467	0	0.891616	0	0.0628946	0.171542	0	0	0	0.24934	0	0	0	0.187337	0.260801
Dalcahue	0.732192	0	0.702467	0	0.891616	0.0833926	0.126731	0.171542	0	0	0	0	0	0	0	0.180529	0.260495
Llanquihue	0.732192	0	0.702467	0	0.891616	0.0833926	0.126731	0.171542	0	0	0	0	0	0	0	0.180529	0.260495
Penco	0.732192	0	0.702467	0	0.891616	0.0833926	0.126731	0.171542	0	0	0	0	0	0	0	0.180529	0.260495
Quellón	0.732192	0	0.702467	0	0.891616	0.0833926	0.126731	0.171542	0	0	0	0	0	0	0	0.180529	0.260495
Cisnes	0.110042	0.145708	0.702467	0.0536212	0.770808	0.221859	0	0.435848	0.174083	0.275418	0	0	0	0.713709	0	0.240238	0.260311
Quinta Normal	0.732192	0.04842	0.702467	0.238557	0	0.7823	0.126731	0	0	0	0	0	0	0	0.101094	0.182117	0.260011
Pica	0.732192	0.04842	0.64116	0.0595854	0.891616	0	0.0534826	0	0	0.0906352	0	0	0	0.253984	0	0.184738	0.259815
Chanco	0.732192	0	0.702467	0	0.891616	0	0	0.171542	0	0	0	0	0	0.253984	0	0.183453	0.257213
Buin	0.732192	0	0.702467	0	0.891616	0.0833926	0.0628946	0.171542	0	0	0	0	0	0	0	0.176274	0.256665
Cerro Navia	0.732192	0	0.702467	0	0.891616	0.0833926	0.0628946	0.171542	0	0	0	0	0	0	0	0.176274	0.256665
Marchihue	0.732192	0	0.702467	0	0.891616	0.0833926	0.0628946	0.171542	0	0	0	0	0	0	0	0.176274	0.256665
Castro	0.732192	0	0.702467	0	0.891616	0	0.126731	0.171542	0	0	0	0	0	0	0	0.17497	0.254657
Chonchi	0.732192	0	0.702467	0	0.891616	0	0.126731	0.171542	0	0	0	0	0	0	0	0.17497	0.254657
Cochamó	0.732192	0	0.702467	0	0.891616	0	0.126731	0.171542	0	0	0	0	0	0	0	0.17497	0.254657
Lota	0.732192	0	0.702467	0	0.891616	0	0.126731	0.171542	0	0	0	0	0	0	0	0.17497	0.254657
Maullín	0.732192	0	0.702467	0	0.891616	0	0.126731	0.171542	0	0	0	0	0	0	0	0.17497	0.254657
Bulnes	0.668677	0	0.702467	0.252718	0.891616	0	0	0	0	0	0	0	0	0	0	0.167699	0.253776
San Rafael	0.732192	0	0.702467	0.0664915	0.891616	0	0	0.171542	0	0	0	0	0	0	0	0.170954	0.253703
Petorca	0.110042	0.434303	0.702467	0.0634537	0.770808	0.0833926	0.0628946	0.414831	0.174083	0.134382	0	0	0	0	0.101094	0.20345	0.253293
Hualañé	0.732192	0	0.702467	0	0.891616	0	0.0638361	0.171542	0	0	0	0	0	0	0	0.170777	0.250884
Lago Ranco	0.732192	0	0.702467	0	0.891616	0	0.0628946	0.171542	0	0	0	0	0	0	0	0.170714	0.250827
Quilaco	0.732192	0	0.702467	0	0.891616	0	0.0628946	0.171542	0	0	0	0	0	0	0	0.170714	0.250827
Sagrada Familia	0.732192	0	0.702467	0	0.891616	0	0.0628946	0.171542	0	0	0	0	0	0	0	0.170714	0.250827
Parral	0.0443449	0.218978	0.702467	0	0.891616	0.7823	0.0628946	0.171542	0	0	0	0	0	0.253984	0	0.208542	0.250415
Lago Verde	0.645065	0	0.472711	0.238557	0.435163	0.0833926	0	0	0.174083	0.266861	0	0	0	0.713709	0.101094	0.208709	0.249264
San Pablo	0.668518	0	0.702467	0	0.891616	0	0.116377	0.171542	0	0	0	0	0	0	0	0.170035	0.245758
Portezuelo	0.732192	0.730076	0.702467	0	0	0	0	0	0	0	0	0	0	0	0	0.144316	0.24574
Tirúa	0.709652	0	0.64116	0	0.891616	0.0833926	0	0.171542	0	0	0	0	0	0	0	0.166491	0.24383
Placilla	0.732192	0	0.64116	0	0.891616	0	0	0.171542	0	0	0	0	0	0	0	0.162434	0.240923
María Pinto	0.0443449	0	0.702467	0	0.891616	0.7823	0.0628946	0.171542	0	0	0.613707	0	0	0	0	0.217925	0.240716
Río Ibáñez	0.110042	0.196143	0.702467	0.111196	0.624687	0.359604	0.0628946	0.414831	0.174083	0	0	0.24934	0	0	0	0.200352	0.239736
San Pedro De La Paz	0.732192	0	0.702467	0.2853	0.153273	0	0.263829	0.171542	0	0.134382	0	0	0	0	0	0.162866	0.239065
Curaco De Vélez	0.349012	0.04842	0.702467	0	0.891616	0	0.126731	0.171542	0	0	0	0	0	0.713709	0	0.200233	0.238718
Talca	0.308732	0	0.702467	0.330093	0.891616	0	0.116377	0	0	0.266861	0	0	0	0	0	0.17441	0.235046
Llaillay	0.173557	0.0754256	0.702467	0.190773	0.624687	0.359604	0.0628946	0.171542	0	0.100386	0	0	0	0.438657	0	0.193333	0.231962
El Carmen	0.0443449	0.04842	0.702467	0	0.891616	0	0.199993	0	0	0.225018	0.613707	0	0	0.713709	0	0.229285	0.229014
Primavera	0.0443449	0	0.702467	0.485662	0.891616	0	0.0628946	0.171542	0	0	0	0	0	0.459725	0	0.187883	0.228362
Punitaqui	0.0443449	0	0.702467	0	0.891616	0.7823	0.0534826	0	0	0	0	0	0	0.529036	0	0.200216	0.226472
Mariquina	0.773167	0	0.702467	0.180614	0	0	0.126731	0	0	0	0	0	0	0.713709	0	0.166446	0.224972
Mejillones	0.732192	0.04842	0.702467	0	0	0.0833926	0.116377	0.171542	0	0.309415	0	0	0	0.275052	0	0.162591	0.220343
Santa Juana	0.732192	0	0.702467	0	0.153273	0	0	0.171542	0	0	0.613707	0	0	0.184673	0	0.170524	0.219921
San Ramón	0.732192	0	0.702467	0.485662	0	0.0833926	0	0	0	0	0	0	0	0	0	0.133581	0.219835
San Vicente	0.773167	0	0.702467	0	0	0.0833926	0.0628946	0	0	0	0.613707	0	0.319373	0	0	0.170333	0.217693
Curepto	0.732192	0	0.233001	0	0.891616	0	0.0628946	0	0	0	0	0	0	0.529036	0	0.163249	0.21475
Contulmo	0.45995	0	0.702467	0	0.891616	0	0	0.171542	0	0	0	0	0	0	0	0.148372	0.211662
Quinchao	0.399621	0	0.702467	0	0.891616	0	0.126731	0.171542	0	0	0	0	0	0	0	0.152798	0.211423
Empedrado	0.732192	0	0.702467	0	0	0	0	0	0	0	0.613707	0	0	0.529036	0	0.171827	0.211141
Tucapel	0.0443449	0	0.702467	0.126292	0.891616	0.698908	0	0	0	0	0	0	0	0	0	0.164242	0.208894
Pumanque	0.468717	0	0.64116	0	0.891616	0	0	0.171542	0	0	0	0	0	0	0	0.144869	0.206671
Putre	0.322516	0.04842	0.566773	0.124066	0.435163	0.644556	0.0534826	0	0	0.134382	0	0	0	0	0	0.155291	0.206197
Pichidegua	0.732192	0	0.702467	0.126292	0	0.0833926	0.0628946	0	0	0	0	0	0	0.438657	0	0.14306	0.205218
Ñuñoa	0.732192	0	0.702467	0	0	0.0833926	0.393443	0.171542	0	0	0	0	0	0	0	0.138869	0.205168
Pemuco	0.0443449	0.04842	0.702467	0	0.891616	0	0.0628946	0	0	0.398146	0	0	0	0.713709	0	0.190773	0.204896
Chañaral	0.732192	0	0.702467	0	0	0.0833926	0.0628946	0	0	0.134382	0	0	0.319373	0.253984	0	0.152579	0.204696
Pirque	0.0443449	0	0.702467	0.304328	0.891616	0.0833926	0.126731	0.171542	0	0	0	0	0	0	0	0.154961	0.201507
Lanco	0.0443449	0	0.702467	0	0.891616	0	0.210347	0.171542	0	0	0	0	0	0.713709	0	0.182268	0.198803
San Carlos	0.732192	0	0.702467	0	0	0	0.0628946	0	0	0	0	0	0	0.713709	0	0.147418	0.197754
Cauquenes	0.0443449	0	0.702467	0	0.891616	0	0.0628946	0.171542	0	0	0.613707	0	0	0.253984	0	0.182704	0.196115
San Ignacio	0.0443449	0	0.702467	0.126077	0.891616	0	0.0628946	0	0	0.367247	0	0	0.319373	0	0	0.167601	0.194859
Quillón	0.0443449	0	0.702467	0.422174	0.891616	0	0.0628946	0	0	0	0	0	0	0	0	0.141566	0.193332
Huasco	0.0443449	0.142157	0.702467	0	0.891616	0.0833926	0	0	0	0.134382	0	0	0	0.438657	0	0.162468	0.193081
Tocopilla	0.0443449	0	0.702467	0	0.891616	0	0	0	0	0	0.613707	0.24934	0	0.253984	0	0.183697	0.192022
Quilleco	0	0	0.702467	0	0.891616	0	0	0	0	0	0.613707	0	0.619932	0	0	0.188515	0.190922
Quirihue	0.0443449	0	0.702467	0.126641	0.891616	0	0	0	0	0.134382	0	0	0	0.529036	0	0.161899	0.187885
Peumo	0.732192	0	0.702467	0	0	0.0833926	0.0628946	0.171542	0	0	0	0	0	0	0	0.116833	0.185335
Vicuña	0.0443449	0	0.702467	0	0.891616	0	0	0	0	0.134382	0	0	0	0.713709	0	0.165768	0.182608
Vallenar	0	0.190577	0.702467	0	0.891616	0	0	0	0	0.134382	0	0	0	0.253984	0	0.144868	0.179418
Peralillo	0.732192	0	0.702467	0	0	0	0.0534826	0	0	0	0	0	0	0.253984	0	0.116142	0.1788
Quinta De Tilcoco	0.732192	0	0.702467	0	0	0.0833926	0.116377	0	0	0	0	0	0	0	0	0.108962	0.178252
San Miguel	0.0443449	0	0.702467	0	0.891616	0	0.210347	0.171542	0	0	0	0	0	0.184673	0	0.146999	0.177641
Monte Patria	0.0443449	0	0.702467	0	0.891616	0	0.0534826	0	0	0	0.613707	0	0	0	0	0.153708	0.175098
Romeral	0	0	0.702467	0	0.891616	0.276249	0.0628946	0.171542	0	0	0	0	0	0	0	0.140318	0.17498
Colchane	0.732192	0	0.702467	0	0	0	0	0	0	0.134382	0	0	0	0	0	0.104603	0.172151
Las Cabras	0.732192	0	0.702467	0	0	0	0	0	0	0.132479	0	0	0	0	0	0.104476	0.172056
Illapel	0.0443449	0	0.702467	0	0.891616	0	0	0	0	0	0.613707	0	0	0	0	0.150142	0.171889
Andacollo	0.0443449	0	0.64116	0	0.891616	0.0833926	0	0	0	0	0.299105	0	0	0.253984	0	0.147574	0.169171
San Fabián	0.0443449	0	0.702467	0	0.891616	0	0	0	0	0	0	0	0	0.529036	0	0.144498	0.168502
San Nicolás	0.0443449	0	0.702467	0	0.891616	0	0	0	0	0	0	0	0	0.529036	0	0.144498	0.168502
Lampa	0.0443449	0	0.702467	0	0.891616	0.0833926	0.0628946	0.171542	0	0	0	0	0	0	0	0.130417	0.167244
Tierra Amarilla	0.0443449	0	0.702467	0	0.891616	0	0	0	0	0.134382	0	0	0.319373	0	0	0.139479	0.166835
Corral	0.40429	0	0	0.237837	0.891616	0.0833926	0	0	0	0	0	0	0.319373	0	0	0.129101	0.166283
Pencahue	0.732192	0	0.702467	0	0	0	0	0	0	0	0	0	0	0	0	0.0956439	0.165432
Cobquecura	0.0443449	0.04842	0.702467	0.1833	0	0.7823	0	0	0	0	0	0	0	0.184673	0	0.1297	0.161816
Caldera	0.0443449	0	0.702467	0	0.153273	0.7823	0.0534826	0	0	0.309415	0	0	0	0	0	0.136352	0.161714
Chaitén	0.0443449	0	0.702467	0	0.891616	0	0.0628946	0.171542	0	0	0	0	0	0	0	0.124858	0.161407
Chile Chico	0.0443449	0	0.702467	0	0.891616	0	0.0628946	0.171542	0	0	0	0	0	0	0	0.124858	0.161407
Máfil	0.0443449	0	0.702467	0	0.891616	0	0.0628946	0.171542	0	0	0	0	0	0	0	0.124858	0.161407
Copiapó	0	0.04842	0.64116	0	0.891616	0.0833926	0.0628946	0	0	0	0	0	0	0.253984	0	0.132098	0.160542
Los Vilos	0	0	0.702467	0	0.891616	0	0	0	0	0	0	0	0	0.459725	0	0.136921	0.159965
Puerto Octay	0.0443449	0	0.702467	0	0.891616	0	0	0.171542	0	0	0	0	0	0	0	0.120665	0.157633
La Higuera	0	0	0.702467	0.0664915	0.891616	0	0.116377	0	0	0	0	0	0	0	0	0.118463	0.155208
Combarbalá	0.0443449	0	0.702467	0	0.891616	0	0.116377	0	0	0	0	0	0	0	0	0.116987	0.154323
Paiguano	0	0	0.702467	0	0.891616	0	0	0	0	0	0	0	0	0.253984	0	0.123204	0.151735
Timaukel	0.0443449	0	0.702467	0	0.891616	0	0.0628946	0	0	0	0	0	0	0	0	0.113421	0.151114
Freirina	0	0	0.702467	0	0.891616	0	0	0	0	0.134382	0	0	0	0	0	0.115231	0.148295
Alto Biobío	0.0443449	0	0.702467	0	0.891616	0	0	0	0	0	0	0	0	0	0	0.109229	0.147341
Constitución	0	0	0.702467	0	0.891616	0	0.0628946	0	0	0	0	0	0	0	0	0.110465	0.14535
Pozo Almonte	0	0	0.498	0	0.891616	0.139053	0.0628946	0	0	0	0	0	0	0.253984	0	0.123037	0.144796
San Rosendo	0.0443449	0.04842	0.702467	0.301446	0	0	0	0	0	0	0	0	0	0.713709	0	0.120692	0.140031
María Elena	0.0443449	0	0.0613066	0.0575748	0.891616	0	0.0534826	0	0	0	0.613707	0	0.319373	0	0	0.136094	0.129514
General Lagos	0.0443449	0	0.314779	0	0.891616	0.0833926	0.0534826	0	0	0	0.145625	0	0	0	0	0.102216	0.123443
Requínoa	0.0443449	0	0.702467	0	0	0.0833926	0.0628946	0.171542	0	0	0.613707	0	0	0	0	0.11189	0.120463
Camiña	0.540576	0	0.478695	0	0	0	0	0	0	0	0	0	0	0	0	0.0679514	0.118144
Treguaco	0.0443449	0	0.702467	0	0	0.0833926	0	0	0	0.134382	0.613707	0	0	0	0	0.10522	0.113116
Canela	0.243975	0	0.702467	0	0	0	0.0628946	0	0	0	0	0	0	0	0	0.0672891	0.105737
Coihueco	0.0443449	0	0.702467	0	0	0	0.0628946	0	0	0	0	0	0	0.529036	0	0.0892495	0.100947
Río Hurtado	0.0443449	0	0.702467	0	0	0.0833926	0.116377	0.171542	0	0	0	0	0	0	0	0.0745416	0.0991241
Ñiquén	0.0443449	0	0.294308	0	0	0.698908	0	0	0	0	0.314602	0	0	0	0	0.0901442	0.0967032
Taltal	0.0443449	0	0.702467	0	0	0.0833926	0	0	0	0	0	0	0.319373	0	0	0.0766385	0.0946239
Huara	0.0443449	0	0.702467	0	0	0	0.0534826	0	0	0.266861	0	0	0	0	0	0.0711437	0.0925635
Calama	0.10786	0	0.367076	0	0	0	0	0	0	0.40005	0	0	0.319373	0	0	0.079624	0.0835069
Longaví	0	0	0.702467	0.111196	0	0	0	0	0	0	0	0	0	0	0	0.0542442	0.0813663
Coelemu	0.0443449	0	0.702467	0	0	0	0.0628946	0	0	0	0	0	0	0	0	0.0539804	0.0797852
Ninhue	0	0	0.702467	0	0	0	0	0	0	0	0	0	0	0	0	0.0468311	0.0702467
Chillán Viejo	0.0443449	0	0.64116	0	0	0	0	0	0	0	0	0	0	0	0	0.0457003	0.0698808
Santa Cruz	0	0	0.64116	0	0	0	0	0	0	0	0	0	0	0	0	0.042744	0.064116
Ollagüe	0.0443449	0	0	0	0	0	0.0534826	0	0	0	0.613707	0	0	0	0	0.0474356	0.0335221
Alto Hospicio	0	0	0	0	0	0.139053	0.0534826	0	0	0	0	0	0	0	0	0.0128357	0.0129427
Calera De Tango	0	0	0	0.0664915	0	0	0	0	0	0	0	0	0	0	0	0.00443277	0.00664915

## Sheet: 1. Puntajes Simples Traspuestos
Comuna	Dimensión	Puntaje Simple
Isla de Maipo	Factor 1: Información de unidades municipales y funcionarios	6	2
Algarrobo	Factor 1: Información de unidades municipales y funcionarios	10	2
Alhué	Factor 1: Información de unidades municipales y funcionarios	11	2
Alto Biobío	Factor 1: Información de unidades municipales y funcionarios	1	2
Alto Del Carmen	Factor 1: Información de unidades municipales y funcionarios	11	2
Alto Hospicio	Factor 1: Información de unidades municipales y funcionarios	0	2
Ancud	Factor 1: Información de unidades municipales y funcionarios	11	2
Andacollo	Factor 1: Información de unidades municipales y funcionarios	1	2
Angol	Factor 1: Información de unidades municipales y funcionarios	9	2
Antofagasta	Factor 1: Información de unidades municipales y funcionarios	12	2
Antuco	Factor 1: Información de unidades municipales y funcionarios	11	2
Arauco	Factor 1: Información de unidades municipales y funcionarios	11	2
Arica	Factor 1: Información de unidades municipales y funcionarios	11	2
Aysén	Factor 1: Información de unidades municipales y funcionarios	11	2
Buin	Factor 1: Información de unidades municipales y funcionarios	11	2
Bulnes	Factor 1: Información de unidades municipales y funcionarios	10	2
Cabildo	Factor 1: Información de unidades municipales y funcionarios	9	2
Cabo De Hornos	Factor 1: Información de unidades municipales y funcionarios	9	2
Cabrero	Factor 1: Información de unidades municipales y funcionarios	11	2
Calama	Factor 1: Información de unidades municipales y funcionarios	2	2
Calbuco	Factor 1: Información de unidades municipales y funcionarios	11	2
Caldera	Factor 1: Información de unidades municipales y funcionarios	1	2
Calera	Factor 1: Información de unidades municipales y funcionarios	8	2
Calera De Tango	Factor 1: Información de unidades municipales y funcionarios	0	2
Calle Larga	Factor 1: Información de unidades municipales y funcionarios	2	2
Camarones	Factor 1: Información de unidades municipales y funcionarios	2	2
Camiña	Factor 1: Información de unidades municipales y funcionarios	8	2
Canela	Factor 1: Información de unidades municipales y funcionarios	4	2
Cañete	Factor 1: Información de unidades municipales y funcionarios	11	2
Carahue	Factor 1: Información de unidades municipales y funcionarios	8	2
Cartagena	Factor 1: Información de unidades municipales y funcionarios	11	2
Casablanca	Factor 1: Información de unidades municipales y funcionarios	11	2
Castro	Factor 1: Información de unidades municipales y funcionarios	11	2
Catemu	Factor 1: Información de unidades municipales y funcionarios	12	2
Cauquenes	Factor 1: Información de unidades municipales y funcionarios	1	2
Cerrillos	Factor 1: Información de unidades municipales y funcionarios	12	2
Cerro Navia	Factor 1: Información de unidades municipales y funcionarios	11	2
Chaitén	Factor 1: Información de unidades municipales y funcionarios	1	2
Chanco	Factor 1: Información de unidades municipales y funcionarios	11	2
Chañaral	Factor 1: Información de unidades municipales y funcionarios	11	2
Chépica	Factor 1: Información de unidades municipales y funcionarios	10	2
Chiguayante	Factor 1: Información de unidades municipales y funcionarios	11	2
Chile Chico	Factor 1: Información de unidades municipales y funcionarios	1	2
Chillán	Factor 1: Información de unidades municipales y funcionarios	11	2
Chillán Viejo	Factor 1: Información de unidades municipales y funcionarios	1	2
Chimbarongo	Factor 1: Información de unidades municipales y funcionarios	11	2
Cholchol	Factor 1: Información de unidades municipales y funcionarios	8	2
Chonchi	Factor 1: Información de unidades municipales y funcionarios	11	2
Cisnes	Factor 1: Información de unidades municipales y funcionarios	2	2
Cobquecura	Factor 1: Información de unidades municipales y funcionarios	1	2
Cochamó	Factor 1: Información de unidades municipales y funcionarios	11	2
Cochrane	Factor 1: Información de unidades municipales y funcionarios	7	2
Codegua	Factor 1: Información de unidades municipales y funcionarios	11	2
Coelemu	Factor 1: Información de unidades municipales y funcionarios	1	2
Coihueco	Factor 1: Información de unidades municipales y funcionarios	1	2
Coinco	Factor 1: Información de unidades municipales y funcionarios	11	2
Colbún	Factor 1: Información de unidades municipales y funcionarios	12	2
Colchane	Factor 1: Información de unidades municipales y funcionarios	11	2
Colina	Factor 1: Información de unidades municipales y funcionarios	11	2
Collipulli	Factor 1: Información de unidades municipales y funcionarios	11	2
Coltauco	Factor 1: Información de unidades municipales y funcionarios	11	2
Combarbalá	Factor 1: Información de unidades municipales y funcionarios	1	2
Concepción	Factor 1: Información de unidades municipales y funcionarios	11	2
Conchalí	Factor 1: Información de unidades municipales y funcionarios	10	2
Concón	Factor 1: Información de unidades municipales y funcionarios	8	2
Constitución	Factor 1: Información de unidades municipales y funcionarios	0	2
Contulmo	Factor 1: Información de unidades municipales y funcionarios	7	2
Copiapó	Factor 1: Información de unidades municipales y funcionarios	0	2
Coquimbo	Factor 1: Información de unidades municipales y funcionarios	11	2
Coronel	Factor 1: Información de unidades municipales y funcionarios	11	2
Corral	Factor 1: Información de unidades municipales y funcionarios	6	2
Coyhaique	Factor 1: Información de unidades municipales y funcionarios	12	2
Cunco	Factor 1: Información de unidades municipales y funcionarios	12	2
Curacautín	Factor 1: Información de unidades municipales y funcionarios	11	2
Curacaví	Factor 1: Información de unidades municipales y funcionarios	11	2
Curaco De Vélez	Factor 1: Información de unidades municipales y funcionarios	5	2
Curanilahue	Factor 1: Información de unidades municipales y funcionarios	11	2
Curarrehue	Factor 1: Información de unidades municipales y funcionarios	9	2
Curepto	Factor 1: Información de unidades municipales y funcionarios	11	2
Curicó	Factor 1: Información de unidades municipales y funcionarios	11	2
Dalcahue	Factor 1: Información de unidades municipales y funcionarios	11	2
Diego De Almagro	Factor 1: Información de unidades municipales y funcionarios	11	2
Doñihue	Factor 1: Información de unidades municipales y funcionarios	11	2
El Bosque	Factor 1: Información de unidades municipales y funcionarios	12	2
El Carmen	Factor 1: Información de unidades municipales y funcionarios	1	2
El Monte	Factor 1: Información de unidades municipales y funcionarios	11	2
El Quisco	Factor 1: Información de unidades municipales y funcionarios	11	2
El Tabo	Factor 1: Información de unidades municipales y funcionarios	10	2
Empedrado	Factor 1: Información de unidades municipales y funcionarios	11	2
Ercilla	Factor 1: Información de unidades municipales y funcionarios	7	2
Estación Central	Factor 1: Información de unidades municipales y funcionarios	12	2
Florida	Factor 1: Información de unidades municipales y funcionarios	11	2
Freire	Factor 1: Información de unidades municipales y funcionarios	8	2
Freirina	Factor 1: Información de unidades municipales y funcionarios	0	2
Fresia	Factor 1: Información de unidades municipales y funcionarios	11	2
Frutillar	Factor 1: Información de unidades municipales y funcionarios	11	2
Futaleufú	Factor 1: Información de unidades municipales y funcionarios	11	2
Futrono	Factor 1: Información de unidades municipales y funcionarios	10	2
Galvarino	Factor 1: Información de unidades municipales y funcionarios	8	2
General Lagos	Factor 1: Información de unidades municipales y funcionarios	1	2
Gorbea	Factor 1: Información de unidades municipales y funcionarios	8	2
Graneros	Factor 1: Información de unidades municipales y funcionarios	11	2
Guaitecas	Factor 1: Información de unidades municipales y funcionarios	9	2
Hijuelas	Factor 1: Información de unidades municipales y funcionarios	11	2
Hualaihué	Factor 1: Información de unidades municipales y funcionarios	10	2
Hualañé	Factor 1: Información de unidades municipales y funcionarios	11	2
Hualpén	Factor 1: Información de unidades municipales y funcionarios	10	2
Hualqui	Factor 1: Información de unidades municipales y funcionarios	11	2
Huara	Factor 1: Información de unidades municipales y funcionarios	1	2
Huasco	Factor 1: Información de unidades municipales y funcionarios	1	2
Huechuraba	Factor 1: Información de unidades municipales y funcionarios	11	2
Illapel	Factor 1: Información de unidades municipales y funcionarios	1	2
Independencia	Factor 1: Información de unidades municipales y funcionarios	11	2
Iquique	Factor 1: Información de unidades municipales y funcionarios	11	2
Juan Fernández	Factor 1: Información de unidades municipales y funcionarios	8	2
La Cisterna	Factor 1: Información de unidades municipales y funcionarios	11	2
La Cruz	Factor 1: Información de unidades municipales y funcionarios	8	2
La Estrella	Factor 1: Información de unidades municipales y funcionarios	11	2
La Florida	Factor 1: Información de unidades municipales y funcionarios	11	2
La Granja	Factor 1: Información de unidades municipales y funcionarios	11	2
La Higuera	Factor 1: Información de unidades municipales y funcionarios	0	2
La Ligua	Factor 1: Información de unidades municipales y funcionarios	11	2
La Pintana	Factor 1: Información de unidades municipales y funcionarios	12	2
La Reina	Factor 1: Información de unidades municipales y funcionarios	11	2
La Serena	Factor 1: Información de unidades municipales y funcionarios	10	2
La Unión	Factor 1: Información de unidades municipales y funcionarios	11	2
Lago Ranco	Factor 1: Información de unidades municipales y funcionarios	11	2
Lago Verde	Factor 1: Información de unidades municipales y funcionarios	10	2
Laguna Blanca	Factor 1: Información de unidades municipales y funcionarios	7	2
Laja	Factor 1: Información de unidades municipales y funcionarios	10	2
Lampa	Factor 1: Información de unidades municipales y funcionarios	1	2
Lanco	Factor 1: Información de unidades municipales y funcionarios	1	2
Las Cabras	Factor 1: Información de unidades municipales y funcionarios	11	2
Las Condes	Factor 1: Información de unidades municipales y funcionarios	11	2
Lautaro	Factor 1: Información de unidades municipales y funcionarios	11	2
Lebu	Factor 1: Información de unidades municipales y funcionarios	11	2
Licantén	Factor 1: Información de unidades municipales y funcionarios	11	2
Limache	Factor 1: Información de unidades municipales y funcionarios	9	2
Linares	Factor 1: Información de unidades municipales y funcionarios	11	2
Litueche	Factor 1: Información de unidades municipales y funcionarios	11	2
Llaillay	Factor 1: Información de unidades municipales y funcionarios	3	2
Llanquihue	Factor 1: Información de unidades municipales y funcionarios	11	2
Lo Barnechea	Factor 1: Información de unidades municipales y funcionarios	12	2
Lo Espejo	Factor 1: Información de unidades municipales y funcionarios	11	2
Lo Prado	Factor 1: Información de unidades municipales y funcionarios	11	2
Lolol	Factor 1: Información de unidades municipales y funcionarios	11	2
Loncoche	Factor 1: Información de unidades municipales y funcionarios	10	2
Longaví	Factor 1: Información de unidades municipales y funcionarios	0	2
Lonquimay	Factor 1: Información de unidades municipales y funcionarios	10	2
Los Álamos	Factor 1: Información de unidades municipales y funcionarios	11	2
Los Andes	Factor 1: Información de unidades municipales y funcionarios	11	2
Los Ángeles	Factor 1: Información de unidades municipales y funcionarios	11	2
Los Lagos	Factor 1: Información de unidades municipales y funcionarios	11	2
Los Muermos	Factor 1: Información de unidades municipales y funcionarios	11	2
Los Sauces	Factor 1: Información de unidades municipales y funcionarios	10	2
Los Vilos	Factor 1: Información de unidades municipales y funcionarios	0	2
Lota	Factor 1: Información de unidades municipales y funcionarios	11	2
Lumaco	Factor 1: Información de unidades municipales y funcionarios	9	2
Machalí	Factor 1: Información de unidades municipales y funcionarios	11	2
Macul	Factor 1: Información de unidades municipales y funcionarios	11	2
Máfil	Factor 1: Información de unidades municipales y funcionarios	1	2
Maipú	Factor 1: Información de unidades municipales y funcionarios	11	2
Malloa	Factor 1: Información de unidades municipales y funcionarios	11	2
Marchihue	Factor 1: Información de unidades municipales y funcionarios	11	2
María Elena	Factor 1: Información de unidades municipales y funcionarios	1	2
María Pinto	Factor 1: Información de unidades municipales y funcionarios	1	2
Mariquina	Factor 1: Información de unidades municipales y funcionarios	12	2
Maule	Factor 1: Información de unidades municipales y funcionarios	11	2
Maullín	Factor 1: Información de unidades municipales y funcionarios	11	2
Mejillones	Factor 1: Información de unidades municipales y funcionarios	11	2
Melipeuco	Factor 1: Información de unidades municipales y funcionarios	5	2
Melipilla	Factor 1: Información de unidades municipales y funcionarios	11	2
Molina	Factor 1: Información de unidades municipales y funcionarios	11	2
Monte Patria	Factor 1: Información de unidades municipales y funcionarios	1	2
Mostazal	Factor 1: Información de unidades municipales y funcionarios	11	2
Mulchén	Factor 1: Información de unidades municipales y funcionarios	11	2
Nacimiento	Factor 1: Información de unidades municipales y funcionarios	11	2
Nancagua	Factor 1: Información de unidades municipales y funcionarios	10	2
Natales	Factor 1: Información de unidades municipales y funcionarios	11	2
Navidad	Factor 1: Información de unidades municipales y funcionarios	11	2
Negrete	Factor 1: Información de unidades municipales y funcionarios	11	2
Ninhue	Factor 1: Información de unidades municipales y funcionarios	0	2
Nogales	Factor 1: Información de unidades municipales y funcionarios	5	2
Nueva Imperial	Factor 1: Información de unidades municipales y funcionarios	9	2
Ñiquén	Factor 1: Información de unidades municipales y funcionarios	1	2
Ñuñoa	Factor 1: Información de unidades municipales y funcionarios	11	2
O'Higgins	Factor 1: Información de unidades municipales y funcionarios	7	2
Olivar	Factor 1: Información de unidades municipales y funcionarios	11	2
Ollagüe	Factor 1: Información de unidades municipales y funcionarios	1	2
Olmué	Factor 1: Información de unidades municipales y funcionarios	9	2
Osorno	Factor 1: Información de unidades municipales y funcionarios	12	2
Ovalle	Factor 1: Información de unidades municipales y funcionarios	11	2
Padre Hurtado	Factor 1: Información de unidades municipales y funcionarios	10	2
Padre Las Casas	Factor 1: Información de unidades municipales y funcionarios	11	2
Paiguano	Factor 1: Información de unidades municipales y funcionarios	0	2
Paillaco	Factor 1: Información de unidades municipales y funcionarios	11	2
Paine	Factor 1: Información de unidades municipales y funcionarios	11	2
Palena	Factor 1: Información de unidades municipales y funcionarios	11	2
Palmilla	Factor 1: Información de unidades municipales y funcionarios	11	2
Panguipulli	Factor 1: Información de unidades municipales y funcionarios	10	2
Panquehue	Factor 1: Información de unidades municipales y funcionarios	9	2
Papudo	Factor 1: Información de unidades municipales y funcionarios	8	2
Paredones	Factor 1: Información de unidades municipales y funcionarios	11	2
Parral	Factor 1: Información de unidades municipales y funcionarios	1	2
Pedro Aguirre Cerda	Factor 1: Información de unidades municipales y funcionarios	11	2
Pelarco	Factor 1: Información de unidades municipales y funcionarios	11	2
Pelluhue	Factor 1: Información de unidades municipales y funcionarios	11	2
Pemuco	Factor 1: Información de unidades municipales y funcionarios	1	2
Pencahue	Factor 1: Información de unidades municipales y funcionarios	11	2
Penco	Factor 1: Información de unidades municipales y funcionarios	11	2
Peñaflor	Factor 1: Información de unidades municipales y funcionarios	12	2
Peñalolén	Factor 1: Información de unidades municipales y funcionarios	11	2
Peralillo	Factor 1: Información de unidades municipales y funcionarios	11	2
Perquenco	Factor 1: Información de unidades municipales y funcionarios	8	2
Petorca	Factor 1: Información de unidades municipales y funcionarios	2	2
Peumo	Factor 1: Información de unidades municipales y funcionarios	11	2
Pica	Factor 1: Información de unidades municipales y funcionarios	11	2
Pichidegua	Factor 1: Información de unidades municipales y funcionarios	11	2
Pichilemu	Factor 1: Información de unidades municipales y funcionarios	11	2
Pinto	Factor 1: Información de unidades municipales y funcionarios	12	2
Pirque	Factor 1: Información de unidades municipales y funcionarios	1	2
Pitrufquén	Factor 1: Información de unidades municipales y funcionarios	9	2
Placilla	Factor 1: Información de unidades municipales y funcionarios	11	2
Portezuelo	Factor 1: Información de unidades municipales y funcionarios	11	2
Porvenir	Factor 1: Información de unidades municipales y funcionarios	12	2
Pozo Almonte	Factor 1: Información de unidades municipales y funcionarios	0	2
Primavera	Factor 1: Información de unidades municipales y funcionarios	1	2
Providencia	Factor 1: Información de unidades municipales y funcionarios	12	2
Puchuncaví	Factor 1: Información de unidades municipales y funcionarios	10	2
Pucón	Factor 1: Información de unidades municipales y funcionarios	11	2
Pudahuel	Factor 1: Información de unidades municipales y funcionarios	11	2
Puente Alto	Factor 1: Información de unidades municipales y funcionarios	11	2
Puerto Montt	Factor 1: Información de unidades municipales y funcionarios	11	2
Puerto Octay	Factor 1: Información de unidades municipales y funcionarios	1	2
Puerto Varas	Factor 1: Información de unidades municipales y funcionarios	12	2
Pumanque	Factor 1: Información de unidades municipales y funcionarios	7	2
Punitaqui	Factor 1: Información de unidades municipales y funcionarios	1	2
Punta Arenas	Factor 1: Información de unidades municipales y funcionarios	11	2
Puqueldón	Factor 1: Información de unidades municipales y funcionarios	11	2
Purén	Factor 1: Información de unidades municipales y funcionarios	9	2
Purranque	Factor 1: Información de unidades municipales y funcionarios	11	2
Putaendo	Factor 1: Información de unidades municipales y funcionarios	9	2
Putre	Factor 1: Información de unidades municipales y funcionarios	5	2
Puyehue	Factor 1: Información de unidades municipales y funcionarios	11	2
Queilén	Factor 1: Información de unidades municipales y funcionarios	11	2
Quellón	Factor 1: Información de unidades municipales y funcionarios	11	2
Quemchi	Factor 1: Información de unidades municipales y funcionarios	11	2
Quilaco	Factor 1: Información de unidades municipales y funcionarios	11	2
Quilicura	Factor 1: Información de unidades municipales y funcionarios	11	2
Quilleco	Factor 1: Información de unidades municipales y funcionarios	0	2
Quillón	Factor 1: Información de unidades municipales y funcionarios	1	2
Quillota	Factor 1: Información de unidades municipales y funcionarios	12	2
Quilpué	Factor 1: Información de unidades municipales y funcionarios	12	2
Quinchao	Factor 1: Información de unidades municipales y funcionarios	6	2
Quinta De Tilcoco	Factor 1: Información de unidades municipales y funcionarios	11	2
Quinta Normal	Factor 1: Información de unidades municipales y funcionarios	11	2
Quintero	Factor 1: Información de unidades municipales y funcionarios	11	2
Quirihue	Factor 1: Información de unidades municipales y funcionarios	1	2
Rancagua	Factor 1: Información de unidades municipales y funcionarios	11	2
Ránquil	Factor 1: Información de unidades municipales y funcionarios	9	2
Rauco	Factor 1: Información de unidades municipales y funcionarios	11	2
Recoleta	Factor 1: Información de unidades municipales y funcionarios	11	2
Renaico	Factor 1: Información de unidades municipales y funcionarios	9	2
Renca	Factor 1: Información de unidades municipales y funcionarios	11	2
Rengo	Factor 1: Información de unidades municipales y funcionarios	12	2
Requínoa	Factor 1: Información de unidades municipales y funcionarios	1	2
Retiro	Factor 1: Información de unidades municipales y funcionarios	11	2
Rinconada	Factor 1: Información de unidades municipales y funcionarios	9	2
Río Bueno	Factor 1: Información de unidades municipales y funcionarios	11	2
Río Claro	Factor 1: Información de unidades municipales y funcionarios	11	2
Río Hurtado	Factor 1: Información de unidades municipales y funcionarios	1	2
Río Ibáñez	Factor 1: Información de unidades municipales y funcionarios	2	2
Río Negro	Factor 1: Información de unidades municipales y funcionarios	11	2
Río Verde	Factor 1: Información de unidades municipales y funcionarios	6	2
Romeral	Factor 1: Información de unidades municipales y funcionarios	0	2
Saavedra	Factor 1: Información de unidades municipales y funcionarios	11	2
Sagrada Familia	Factor 1: Información de unidades municipales y funcionarios	11	2
Salamanca	Factor 1: Información de unidades municipales y funcionarios	11	2
San Antonio	Factor 1: Información de unidades municipales y funcionarios	12	2
San Bernardo	Factor 1: Información de unidades municipales y funcionarios	11	2
San Carlos	Factor 1: Información de unidades municipales y funcionarios	11	2
San Clemente	Factor 1: Información de unidades municipales y funcionarios	11	2
San Esteban	Factor 1: Información de unidades municipales y funcionarios	9	2
San Fabián	Factor 1: Información de unidades municipales y funcionarios	1	2
San Felipe	Factor 1: Información de unidades municipales y funcionarios	11	2
San Fernando	Factor 1: Información de unidades municipales y funcionarios	11	2
San Gregorio	Factor 1: Información de unidades municipales y funcionarios	2	2
San Ignacio	Factor 1: Información de unidades municipales y funcionarios	1	2
San Javier	Factor 1: Información de unidades municipales y funcionarios	11	2
San Joaquín	Factor 1: Información de unidades municipales y funcionarios	11	2
San José De Maipo	Factor 1: Información de unidades municipales y funcionarios	11	2
San Juan De La Costa	Factor 1: Información de unidades municipales y funcionarios	12	2
San Miguel	Factor 1: Información de unidades municipales y funcionarios	1	2
San Nicolás	Factor 1: Información de unidades municipales y funcionarios	1	2
San Pablo	Factor 1: Información de unidades municipales y funcionarios	10	2
San Pedro	Factor 1: Información de unidades municipales y funcionarios	11	2
San Pedro De Atacama	Factor 1: Información de unidades municipales y funcionarios	11	2
San Pedro De La Paz	Factor 1: Información de unidades municipales y funcionarios	11	2
San Rafael	Factor 1: Información de unidades municipales y funcionarios	11	2
San Ramón	Factor 1: Información de unidades municipales y funcionarios	11	2
San Rosendo	Factor 1: Información de unidades municipales y funcionarios	1	2
San Vicente	Factor 1: Información de unidades municipales y funcionarios	12	2
Santa Bárbara	Factor 1: Información de unidades municipales y funcionarios	12	2
Santa Cruz	Factor 1: Información de unidades municipales y funcionarios	0	2
Santa Juana	Factor 1: Información de unidades municipales y funcionarios	11	2
Santa María	Factor 1: Información de unidades municipales y funcionarios	7	2
Santiago	Factor 1: Información de unidades municipales y funcionarios	11	2
Santo Domingo	Factor 1: Información de unidades municipales y funcionarios	11	2
Sierra Gorda	Factor 1: Información de unidades municipales y funcionarios	11	2
Talagante	Factor 1: Información de unidades municipales y funcionarios	11	2
Talca	Factor 1: Información de unidades municipales y funcionarios	5	2
Talcahuano	Factor 1: Información de unidades municipales y funcionarios	11	2
Taltal	Factor 1: Información de unidades municipales y funcionarios	1	2
Temuco	Factor 1: Información de unidades municipales y funcionarios	12	2
Teno	Factor 1: Información de unidades municipales y funcionarios	11	2
Teodoro Schmidt	Factor 1: Información de unidades municipales y funcionarios	11	2
Tierra Amarilla	Factor 1: Información de unidades municipales y funcionarios	1	2
Tiltil	Factor 1: Información de unidades municipales y funcionarios	11	2
Timaukel	Factor 1: Información de unidades municipales y funcionarios	1	2
Tirúa	Factor 1: Información de unidades municipales y funcionarios	11	2
Tocopilla	Factor 1: Información de unidades municipales y funcionarios	1	2
Toltén	Factor 1: Información de unidades municipales y funcionarios	1	2
Tomé	Factor 1: Información de unidades municipales y funcionarios	11	2
Torres Del Paine	Factor 1: Información de unidades municipales y funcionarios	10	2
Tortel	Factor 1: Información de unidades municipales y funcionarios	9	2
Traiguén	Factor 1: Información de unidades municipales y funcionarios	9	2
Treguaco	Factor 1: Información de unidades municipales y funcionarios	1	2
Tucapel	Factor 1: Información de unidades municipales y funcionarios	1	2
Valdivia	Factor 1: Información de unidades municipales y funcionarios	11	2
Vallenar	Factor 1: Información de unidades municipales y funcionarios	0	2
Valparaíso	Factor 1: Información de unidades municipales y funcionarios	7	2
Vichuquén	Factor 1: Información de unidades municipales y funcionarios	11	2
Victoria	Factor 1: Información de unidades municipales y funcionarios	9	2
Vicuña	Factor 1: Información de unidades municipales y funcionarios	1	2
Vilcún	Factor 1: Información de unidades municipales y funcionarios	9	2
Villa Alegre	Factor 1: Información de unidades municipales y funcionarios	11	2
Villa Alemana	Factor 1: Información de unidades municipales y funcionarios	11	2
Villarrica	Factor 1: Información de unidades municipales y funcionarios	12	2
Viña Del Mar	Factor 1: Información de unidades municipales y funcionarios	8	2
Vitacura	Factor 1: Información de unidades municipales y funcionarios	11	2
Yerbas Buenas	Factor 1: Información de unidades municipales y funcionarios	11	2
Yumbel	Factor 1: Información de unidades municipales y funcionarios	10	2
Yungay	Factor 1: Información de unidades municipales y funcionarios	11	2
Zapallar	Factor 1: Información de unidades municipales y funcionarios	11	2
Isla de Maipo	Factor 2: Integración	3	3
Algarrobo	Factor 2: Integración	6	3
Alhué	Factor 2: Integración	0	3
Alto Biobío	Factor 2: Integración	0	3
Alto Del Carmen	Factor 2: Integración	2	3
Alto Hospicio	Factor 2: Integración	0	3
Ancud	Factor 2: Integración	10	3
Andacollo	Factor 2: Integración	0	3
Angol	Factor 2: Integración	2	3
Antofagasta	Factor 2: Integración	10	3
Antuco	Factor 2: Integración	0	3
Arauco	Factor 2: Integración	0	3
Arica	Factor 2: Integración	0	3
Aysén	Factor 2: Integración	8	3
Buin	Factor 2: Integración	0	3
Bulnes	Factor 2: Integración	0	3
Cabildo	Factor 2: Integración	5	3
Cabo De Hornos	Factor 2: Integración	3	3
Cabrero	Factor 2: Integración	0	3
Calama	Factor 2: Integración	0	3
Calbuco	Factor 2: Integración	0	3
Caldera	Factor 2: Integración	0	3
Calera	Factor 2: Integración	2	3
Calera De Tango	Factor 2: Integración	0	3
Calle Larga	Factor 2: Integración	3	3
Camarones	Factor 2: Integración	1	3
Camiña	Factor 2: Integración	0	3
Canela	Factor 2: Integración	0	3
Cañete	Factor 2: Integración	0	3
Carahue	Factor 2: Integración	4	3
Cartagena	Factor 2: Integración	1	3
Casablanca	Factor 2: Integración	8	3
Castro	Factor 2: Integración	0	3
Catemu	Factor 2: Integración	0	3
Cauquenes	Factor 2: Integración	0	3
Cerrillos	Factor 2: Integración	0	3
Cerro Navia	Factor 2: Integración	0	3
Chaitén	Factor 2: Integración	0	3
Chanco	Factor 2: Integración	0	3
Chañaral	Factor 2: Integración	0	3
Chépica	Factor 2: Integración	0	3
Chiguayante	Factor 2: Integración	10	3
Chile Chico	Factor 2: Integración	0	3
Chillán	Factor 2: Integración	10	3
Chillán Viejo	Factor 2: Integración	0	3
Chimbarongo	Factor 2: Integración	5	3
Cholchol	Factor 2: Integración	3	3
Chonchi	Factor 2: Integración	0	3
Cisnes	Factor 2: Integración	2	3
Cobquecura	Factor 2: Integración	1	3
Cochamó	Factor 2: Integración	0	3
Cochrane	Factor 2: Integración	0	3
Codegua	Factor 2: Integración	0	3
Coelemu	Factor 2: Integración	0	3
Coihueco	Factor 2: Integración	0	3
Coinco	Factor 2: Integración	0	3
Colbún	Factor 2: Integración	0	3
Colchane	Factor 2: Integración	0	3
Colina	Factor 2: Integración	0	3
Collipulli	Factor 2: Integración	4	3
Coltauco	Factor 2: Integración	0	3
Combarbalá	Factor 2: Integración	0	3
Concepción	Factor 2: Integración	0	3
Conchalí	Factor 2: Integración	0	3
Concón	Factor 2: Integración	6	3
Constitución	Factor 2: Integración	0	3
Contulmo	Factor 2: Integración	0	3
Copiapó	Factor 2: Integración	1	3
Coquimbo	Factor 2: Integración	0	3
Coronel	Factor 2: Integración	0	3
Corral	Factor 2: Integración	0	3
Coyhaique	Factor 2: Integración	6	3
Cunco	Factor 2: Integración	7	3
Curacautín	Factor 2: Integración	6	3
Curacaví	Factor 2: Integración	0	3
Curaco De Vélez	Factor 2: Integración	1	3
Curanilahue	Factor 2: Integración	10	3
Curarrehue	Factor 2: Integración	1	3
Curepto	Factor 2: Integración	0	3
Curicó	Factor 2: Integración	0	3
Dalcahue	Factor 2: Integración	0	3
Diego De Almagro	Factor 2: Integración	2	3
Doñihue	Factor 2: Integración	0	3
El Bosque	Factor 2: Integración	0	3
El Carmen	Factor 2: Integración	1	3
El Monte	Factor 2: Integración	0	3
El Quisco	Factor 2: Integración	8	3
El Tabo	Factor 2: Integración	7	3
Empedrado	Factor 2: Integración	0	3
Ercilla	Factor 2: Integración	3	3
Estación Central	Factor 2: Integración	0	3
Florida	Factor 2: Integración	0	3
Freire	Factor 2: Integración	1	3
Freirina	Factor 2: Integración	0	3
Fresia	Factor 2: Integración	0	3
Frutillar	Factor 2: Integración	1	3
Futaleufú	Factor 2: Integración	10	3
Futrono	Factor 2: Integración	0	3
Galvarino	Factor 2: Integración	4	3
General Lagos	Factor 2: Integración	0	3
Gorbea	Factor 2: Integración	7	3
Graneros	Factor 2: Integración	0	3
Guaitecas	Factor 2: Integración	5	3
Hijuelas	Factor 2: Integración	2	3
Hualaihué	Factor 2: Integración	0	3
Hualañé	Factor 2: Integración	0	3
Hualpén	Factor 2: Integración	0	3
Hualqui	Factor 2: Integración	9	3
Huara	Factor 2: Integración	0	3
Huasco	Factor 2: Integración	2	3
Huechuraba	Factor 2: Integración	0	3
Illapel	Factor 2: Integración	0	3
Independencia	Factor 2: Integración	0	3
Iquique	Factor 2: Integración	7	3
Juan Fernández	Factor 2: Integración	1	3
La Cisterna	Factor 2: Integración	10	3
La Cruz	Factor 2: Integración	3	3
La Estrella	Factor 2: Integración	0	3
La Florida	Factor 2: Integración	10	3
La Granja	Factor 2: Integración	0	3
La Higuera	Factor 2: Integración	0	3
La Ligua	Factor 2: Integración	4	3
La Pintana	Factor 2: Integración	1	3
La Reina	Factor 2: Integración	5	3
La Serena	Factor 2: Integración	0	3
La Unión	Factor 2: Integración	1	3
Lago Ranco	Factor 2: Integración	0	3
Lago Verde	Factor 2: Integración	0	3
Laguna Blanca	Factor 2: Integración	0	3
Laja	Factor 2: Integración	0	3
Lampa	Factor 2: Integración	0	3
Lanco	Factor 2: Integración	0	3
Las Cabras	Factor 2: Integración	0	3
Las Condes	Factor 2: Integración	10	3
Lautaro	Factor 2: Integración	1	3
Lebu	Factor 2: Integración	0	3
Licantén	Factor 2: Integración	0	3
Limache	Factor 2: Integración	7	3
Linares	Factor 2: Integración	0	3
Litueche	Factor 2: Integración	0	3
Llaillay	Factor 2: Integración	1	3
Llanquihue	Factor 2: Integración	0	3
Lo Barnechea	Factor 2: Integración	10	3
Lo Espejo	Factor 2: Integración	0	3
Lo Prado	Factor 2: Integración	0	3
Lolol	Factor 2: Integración	0	3
Loncoche	Factor 2: Integración	5	3
Longaví	Factor 2: Integración	0	3
Lonquimay	Factor 2: Integración	5	3
Los Álamos	Factor 2: Integración	0	3
Los Andes	Factor 2: Integración	2	3
Los Ángeles	Factor 2: Integración	4	3
Los Lagos	Factor 2: Integración	0	3
Los Muermos	Factor 2: Integración	0	3
Los Sauces	Factor 2: Integración	5	3
Los Vilos	Factor 2: Integración	0	3
Lota	Factor 2: Integración	0	3
Lumaco	Factor 2: Integración	6	3
Machalí	Factor 2: Integración	9	3
Macul	Factor 2: Integración	0	3
Máfil	Factor 2: Integración	0	3
Maipú	Factor 2: Integración	5	3
Malloa	Factor 2: Integración	0	3
Marchihue	Factor 2: Integración	0	3
María Elena	Factor 2: Integración	0	3
María Pinto	Factor 2: Integración	0	3
Mariquina	Factor 2: Integración	0	3
Maule	Factor 2: Integración	0	3
Maullín	Factor 2: Integración	0	3
Mejillones	Factor 2: Integración	1	3
Melipeuco	Factor 2: Integración	6	3
Melipilla	Factor 2: Integración	0	3
Molina	Factor 2: Integración	0	3
Monte Patria	Factor 2: Integración	0	3
Mostazal	Factor 2: Integración	10	3
Mulchén	Factor 2: Integración	0	3
Nacimiento	Factor 2: Integración	0	3
Nancagua	Factor 2: Integración	10	3
Natales	Factor 2: Integración	1	3
Navidad	Factor 2: Integración	0	3
Negrete	Factor 2: Integración	0	3
Ninhue	Factor 2: Integración	0	3
Nogales	Factor 2: Integración	0	3
Nueva Imperial	Factor 2: Integración	6	3
Ñiquén	Factor 2: Integración	0	3
Ñuñoa	Factor 2: Integración	0	3
O'Higgins	Factor 2: Integración	0	3
Olivar	Factor 2: Integración	0	3
Ollagüe	Factor 2: Integración	0	3
Olmué	Factor 2: Integración	7	3
Osorno	Factor 2: Integración	0	3
Ovalle	Factor 2: Integración	0	3
Padre Hurtado	Factor 2: Integración	3	3
Padre Las Casas	Factor 2: Integración	7	3
Paiguano	Factor 2: Integración	0	3
Paillaco	Factor 2: Integración	0	3
Paine	Factor 2: Integración	1	3
Palena	Factor 2: Integración	0	3
Palmilla	Factor 2: Integración	0	3
Panguipulli	Factor 2: Integración	0	3
Panquehue	Factor 2: Integración	5	3
Papudo	Factor 2: Integración	5	3
Paredones	Factor 2: Integración	0	3
Parral	Factor 2: Integración	3	3
Pedro Aguirre Cerda	Factor 2: Integración	0	3
Pelarco	Factor 2: Integración	0	3
Pelluhue	Factor 2: Integración	0	3
Pemuco	Factor 2: Integración	1	3
Pencahue	Factor 2: Integración	0	3
Penco	Factor 2: Integración	0	3
Peñaflor	Factor 2: Integración	5	3
Peñalolén	Factor 2: Integración	9	3
Peralillo	Factor 2: Integración	0	3
Perquenco	Factor 2: Integración	4	3
Petorca	Factor 2: Integración	6	3
Peumo	Factor 2: Integración	0	3
Pica	Factor 2: Integración	1	3
Pichidegua	Factor 2: Integración	0	3
Pichilemu	Factor 2: Integración	0	3
Pinto	Factor 2: Integración	0	3
Pirque	Factor 2: Integración	0	3
Pitrufquén	Factor 2: Integración	5	3
Placilla	Factor 2: Integración	0	3
Portezuelo	Factor 2: Integración	10	3
Porvenir	Factor 2: Integración	0	3
Pozo Almonte	Factor 2: Integración	0	3
Primavera	Factor 2: Integración	0	3
Providencia	Factor 2: Integración	10	3
Puchuncaví	Factor 2: Integración	6	3
Pucón	Factor 2: Integración	7	3
Pudahuel	Factor 2: Integración	0	3
Puente Alto	Factor 2: Integración	0	3
Puerto Montt	Factor 2: Integración	0	3
Puerto Octay	Factor 2: Integración	0	3
Puerto Varas	Factor 2: Integración	0	3
Pumanque	Factor 2: Integración	0	3
Punitaqui	Factor 2: Integración	0	3
Punta Arenas	Factor 2: Integración	4	3
Puqueldón	Factor 2: Integración	0	3
Purén	Factor 2: Integración	4	3
Purranque	Factor 2: Integración	0	3
Putaendo	Factor 2: Integración	6	3
Putre	Factor 2: Integración	1	3
Puyehue	Factor 2: Integración	0	3
Queilén	Factor 2: Integración	0	3
Quellón	Factor 2: Integración	0	3
Quemchi	Factor 2: Integración	1	3
Quilaco	Factor 2: Integración	0	3
Quilicura	Factor 2: Integración	10	3
Quilleco	Factor 2: Integración	0	3
Quillón	Factor 2: Integración	0	3
Quillota	Factor 2: Integración	9	3
Quilpué	Factor 2: Integración	5	3
Quinchao	Factor 2: Integración	0	3
Quinta De Tilcoco	Factor 2: Integración	0	3
Quinta Normal	Factor 2: Integración	1	3
Quintero	Factor 2: Integración	1	3
Quirihue	Factor 2: Integración	0	3
Rancagua	Factor 2: Integración	0	3
Ránquil	Factor 2: Integración	1	3
Rauco	Factor 2: Integración	0	3
Recoleta	Factor 2: Integración	0	3
Renaico	Factor 2: Integración	2	3
Renca	Factor 2: Integración	0	3
Rengo	Factor 2: Integración	0	3
Requínoa	Factor 2: Integración	0	3
Retiro	Factor 2: Integración	0	3
Rinconada	Factor 2: Integración	8	3
Río Bueno	Factor 2: Integración	0	3
Río Claro	Factor 2: Integración	0	3
Río Hurtado	Factor 2: Integración	0	3
Río Ibáñez	Factor 2: Integración	3	3
Río Negro	Factor 2: Integración	0	3
Río Verde	Factor 2: Integración	3	3
Romeral	Factor 2: Integración	0	3
Saavedra	Factor 2: Integración	2	3
Sagrada Familia	Factor 2: Integración	0	3
Salamanca	Factor 2: Integración	0	3
San Antonio	Factor 2: Integración	9	3
San Bernardo	Factor 2: Integración	0	3
San Carlos	Factor 2: Integración	0	3
San Clemente	Factor 2: Integración	0	3
San Esteban	Factor 2: Integración	5	3
San Fabián	Factor 2: Integración	0	3
San Felipe	Factor 2: Integración	9	3
San Fernando	Factor 2: Integración	10	3
San Gregorio	Factor 2: Integración	4	3
San Ignacio	Factor 2: Integración	0	3
San Javier	Factor 2: Integración	9	3
San Joaquín	Factor 2: Integración	9	3
San José De Maipo	Factor 2: Integración	0	3
San Juan De La Costa	Factor 2: Integración	5	3
San Miguel	Factor 2: Integración	0	3
San Nicolás	Factor 2: Integración	0	3
San Pablo	Factor 2: Integración	0	3
San Pedro	Factor 2: Integración	0	3
San Pedro De Atacama	Factor 2: Integración	0	3
San Pedro De La Paz	Factor 2: Integración	0	3
San Rafael	Factor 2: Integración	0	3
San Ramón	Factor 2: Integración	0	3
San Rosendo	Factor 2: Integración	1	3
San Vicente	Factor 2: Integración	0	3
Santa Bárbara	Factor 2: Integración	4	3
Santa Cruz	Factor 2: Integración	0	3
Santa Juana	Factor 2: Integración	0	3
Santa María	Factor 2: Integración	2	3
Santiago	Factor 2: Integración	10	3
Santo Domingo	Factor 2: Integración	6	3
Sierra Gorda	Factor 2: Integración	1	3
Talagante	Factor 2: Integración	5	3
Talca	Factor 2: Integración	0	3
Talcahuano	Factor 2: Integración	1	3
Taltal	Factor 2: Integración	0	3
Temuco	Factor 2: Integración	7	3
Teno	Factor 2: Integración	0	3
Teodoro Schmidt	Factor 2: Integración	7	3
Tierra Amarilla	Factor 2: Integración	0	3
Tiltil	Factor 2: Integración	5	3
Timaukel	Factor 2: Integración	0	3
Tirúa	Factor 2: Integración	0	3
Tocopilla	Factor 2: Integración	0	3
Toltén	Factor 2: Integración	3	3
Tomé	Factor 2: Integración	4	3
Torres Del Paine	Factor 2: Integración	0	3
Tortel	Factor 2: Integración	3	3
Traiguén	Factor 2: Integración	6	3
Treguaco	Factor 2: Integración	0	3
Tucapel	Factor 2: Integración	0	3
Valdivia	Factor 2: Integración	1	3
Vallenar	Factor 2: Integración	3	3
Valparaíso	Factor 2: Integración	6	3
Vichuquén	Factor 2: Integración	0	3
Victoria	Factor 2: Integración	9	3
Vicuña	Factor 2: Integración	0	3
Vilcún	Factor 2: Integración	7	3
Villa Alegre	Factor 2: Integración	0	3
Villa Alemana	Factor 2: Integración	5	3
Villarrica	Factor 2: Integración	5	3
Viña Del Mar	Factor 2: Integración	2	3
Vitacura	Factor 2: Integración	9	3
Yerbas Buenas	Factor 2: Integración	0	3
Yumbel	Factor 2: Integración	0	3
Yungay	Factor 2: Integración	0	3
Zapallar	Factor 2: Integración	3	3
Isla de Maipo	Factor 3: Transparencia	6	4
Algarrobo	Factor 3: Transparencia	10	4
Alhué	Factor 3: Transparencia	10	4
Alto Biobío	Factor 3: Transparencia	10	4
Alto Del Carmen	Factor 3: Transparencia	10	4
Alto Hospicio	Factor 3: Transparencia	0	4
Ancud	Factor 3: Transparencia	10	4
Andacollo	Factor 3: Transparencia	9	4
Angol	Factor 3: Transparencia	10	4
Antofagasta	Factor 3: Transparencia	10	4
Antuco	Factor 3: Transparencia	10	4
Arauco	Factor 3: Transparencia	10	4
Arica	Factor 3: Transparencia	7	4
Aysén	Factor 3: Transparencia	10	4
Buin	Factor 3: Transparencia	10	4
Bulnes	Factor 3: Transparencia	10	4
Cabildo	Factor 3: Transparencia	10	4
Cabo De Hornos	Factor 3: Transparencia	10	4
Cabrero	Factor 3: Transparencia	10	4
Calama	Factor 3: Transparencia	6	4
Calbuco	Factor 3: Transparencia	10	4
Caldera	Factor 3: Transparencia	10	4
Calera	Factor 3: Transparencia	10	4
Calera De Tango	Factor 3: Transparencia	0	4
Calle Larga	Factor 3: Transparencia	10	4
Camarones	Factor 3: Transparencia	10	4
Camiña	Factor 3: Transparencia	7	4
Canela	Factor 3: Transparencia	10	4
Cañete	Factor 3: Transparencia	10	4
Carahue	Factor 3: Transparencia	10	4
Cartagena	Factor 3: Transparencia	10	4
Casablanca	Factor 3: Transparencia	10	4
Castro	Factor 3: Transparencia	10	4
Catemu	Factor 3: Transparencia	10	4
Cauquenes	Factor 3: Transparencia	10	4
Cerrillos	Factor 3: Transparencia	10	4
Cerro Navia	Factor 3: Transparencia	10	4
Chaitén	Factor 3: Transparencia	10	4
Chanco	Factor 3: Transparencia	10	4
Chañaral	Factor 3: Transparencia	10	4
Chépica	Factor 3: Transparencia	10	4
Chiguayante	Factor 3: Transparencia	10	4
Chile Chico	Factor 3: Transparencia	10	4
Chillán	Factor 3: Transparencia	10	4
Chillán Viejo	Factor 3: Transparencia	9	4
Chimbarongo	Factor 3: Transparencia	10	4
Cholchol	Factor 3: Transparencia	10	4
Chonchi	Factor 3: Transparencia	10	4
Cisnes	Factor 3: Transparencia	10	4
Cobquecura	Factor 3: Transparencia	10	4
Cochamó	Factor 3: Transparencia	10	4
Cochrane	Factor 3: Transparencia	9	4
Codegua	Factor 3: Transparencia	10	4
Coelemu	Factor 3: Transparencia	10	4
Coihueco	Factor 3: Transparencia	10	4
Coinco	Factor 3: Transparencia	10	4
Colbún	Factor 3: Transparencia	10	4
Colchane	Factor 3: Transparencia	10	4
Colina	Factor 3: Transparencia	10	4
Collipulli	Factor 3: Transparencia	10	4
Coltauco	Factor 3: Transparencia	10	4
Combarbalá	Factor 3: Transparencia	10	4
Concepción	Factor 3: Transparencia	10	4
Conchalí	Factor 3: Transparencia	10	4
Concón	Factor 3: Transparencia	7	4
Constitución	Factor 3: Transparencia	10	4
Contulmo	Factor 3: Transparencia	10	4
Copiapó	Factor 3: Transparencia	9	4
Coquimbo	Factor 3: Transparencia	10	4
Coronel	Factor 3: Transparencia	10	4
Corral	Factor 3: Transparencia	0	4
Coyhaique	Factor 3: Transparencia	10	4
Cunco	Factor 3: Transparencia	10	4
Curacautín	Factor 3: Transparencia	9	4
Curacaví	Factor 3: Transparencia	10	4
Curaco De Vélez	Factor 3: Transparencia	10	4
Curanilahue	Factor 3: Transparencia	10	4
Curarrehue	Factor 3: Transparencia	10	4
Curepto	Factor 3: Transparencia	4	4
Curicó	Factor 3: Transparencia	10	4
Dalcahue	Factor 3: Transparencia	10	4
Diego De Almagro	Factor 3: Transparencia	10	4
Doñihue	Factor 3: Transparencia	10	4
El Bosque	Factor 3: Transparencia	10	4
El Carmen	Factor 3: Transparencia	10	4
El Monte	Factor 3: Transparencia	10	4
El Quisco	Factor 3: Transparencia	10	4
El Tabo	Factor 3: Transparencia	10	4
Empedrado	Factor 3: Transparencia	10	4
Ercilla	Factor 3: Transparencia	10	4
Estación Central	Factor 3: Transparencia	10	4
Florida	Factor 3: Transparencia	10	4
Freire	Factor 3: Transparencia	10	4
Freirina	Factor 3: Transparencia	10	4
Fresia	Factor 3: Transparencia	10	4
Frutillar	Factor 3: Transparencia	10	4
Futaleufú	Factor 3: Transparencia	10	4
Futrono	Factor 3: Transparencia	10	4
Galvarino	Factor 3: Transparencia	10	4
General Lagos	Factor 3: Transparencia	5	4
Gorbea	Factor 3: Transparencia	10	4
Graneros	Factor 3: Transparencia	10	4
Guaitecas	Factor 3: Transparencia	10	4
Hijuelas	Factor 3: Transparencia	9	4
Hualaihué	Factor 3: Transparencia	10	4
Hualañé	Factor 3: Transparencia	10	4
Hualpén	Factor 3: Transparencia	10	4
Hualqui	Factor 3: Transparencia	10	4
Huara	Factor 3: Transparencia	10	4
Huasco	Factor 3: Transparencia	10	4
Huechuraba	Factor 3: Transparencia	10	4
Illapel	Factor 3: Transparencia	10	4
Independencia	Factor 3: Transparencia	10	4
Iquique	Factor 3: Transparencia	7	4
Juan Fernández	Factor 3: Transparencia	6	4
La Cisterna	Factor 3: Transparencia	10	4
La Cruz	Factor 3: Transparencia	9	4
La Estrella	Factor 3: Transparencia	10	4
La Florida	Factor 3: Transparencia	10	4
La Granja	Factor 3: Transparencia	10	4
La Higuera	Factor 3: Transparencia	10	4
La Ligua	Factor 3: Transparencia	10	4
La Pintana	Factor 3: Transparencia	10	4
La Reina	Factor 3: Transparencia	10	4
La Serena	Factor 3: Transparencia	10	4
La Unión	Factor 3: Transparencia	10	4
Lago Ranco	Factor 3: Transparencia	10	4
Lago Verde	Factor 3: Transparencia	7	4
Laguna Blanca	Factor 3: Transparencia	10	4
Laja	Factor 3: Transparencia	10	4
Lampa	Factor 3: Transparencia	10	4
Lanco	Factor 3: Transparencia	10	4
Las Cabras	Factor 3: Transparencia	10	4
Las Condes	Factor 3: Transparencia	10	4
Lautaro	Factor 3: Transparencia	10	4
Lebu	Factor 3: Transparencia	10	4
Licantén	Factor 3: Transparencia	10	4
Limache	Factor 3: Transparencia	10	4
Linares	Factor 3: Transparencia	10	4
Litueche	Factor 3: Transparencia	10	4
Llaillay	Factor 3: Transparencia	10	4
Llanquihue	Factor 3: Transparencia	10	4
Lo Barnechea	Factor 3: Transparencia	10	4
Lo Espejo	Factor 3: Transparencia	10	4
Lo Prado	Factor 3: Transparencia	10	4
Lolol	Factor 3: Transparencia	10	4
Loncoche	Factor 3: Transparencia	10	4
Longaví	Factor 3: Transparencia	10	4
Lonquimay	Factor 3: Transparencia	10	4
Los Álamos	Factor 3: Transparencia	10	4
Los Andes	Factor 3: Transparencia	10	4
Los Ángeles	Factor 3: Transparencia	10	4
Los Lagos	Factor 3: Transparencia	10	4
Los Muermos	Factor 3: Transparencia	10	4
Los Sauces	Factor 3: Transparencia	10	4
Los Vilos	Factor 3: Transparencia	10	4
Lota	Factor 3: Transparencia	10	4
Lumaco	Factor 3: Transparencia	10	4
Machalí	Factor 3: Transparencia	10	4
Macul	Factor 3: Transparencia	10	4
Máfil	Factor 3: Transparencia	10	4
Maipú	Factor 3: Transparencia	10	4
Malloa	Factor 3: Transparencia	10	4
Marchihue	Factor 3: Transparencia	10	4
María Elena	Factor 3: Transparencia	1	4
María Pinto	Factor 3: Transparencia	10	4
Mariquina	Factor 3: Transparencia	10	4
Maule	Factor 3: Transparencia	9	4
Maullín	Factor 3: Transparencia	10	4
Mejillones	Factor 3: Transparencia	10	4
Melipeuco	Factor 3: Transparencia	10	4
Melipilla	Factor 3: Transparencia	10	4
Molina	Factor 3: Transparencia	10	4
Monte Patria	Factor 3: Transparencia	10	4
Mostazal	Factor 3: Transparencia	10	4
Mulchén	Factor 3: Transparencia	10	4
Nacimiento	Factor 3: Transparencia	10	4
Nancagua	Factor 3: Transparencia	10	4
Natales	Factor 3: Transparencia	10	4
Navidad	Factor 3: Transparencia	10	4
Negrete	Factor 3: Transparencia	10	4
Ninhue	Factor 3: Transparencia	10	4
Nogales	Factor 3: Transparencia	10	4
Nueva Imperial	Factor 3: Transparencia	10	4
Ñiquén	Factor 3: Transparencia	5	4
Ñuñoa	Factor 3: Transparencia	10	4
O'Higgins	Factor 3: Transparencia	9	4
Olivar	Factor 3: Transparencia	10	4
Ollagüe	Factor 3: Transparencia	0	4
Olmué	Factor 3: Transparencia	10	4
Osorno	Factor 3: Transparencia	10	4
Ovalle	Factor 3: Transparencia	10	4
Padre Hurtado	Factor 3: Transparencia	7	4
Padre Las Casas	Factor 3: Transparencia	10	4
Paiguano	Factor 3: Transparencia	10	4
Paillaco	Factor 3: Transparencia	10	4
Paine	Factor 3: Transparencia	10	4
Palena	Factor 3: Transparencia	10	4
Palmilla	Factor 3: Transparencia	9	4
Panguipulli	Factor 3: Transparencia	10	4
Panquehue	Factor 3: Transparencia	10	4
Papudo	Factor 3: Transparencia	10	4
Paredones	Factor 3: Transparencia	10	4
Parral	Factor 3: Transparencia	10	4
Pedro Aguirre Cerda	Factor 3: Transparencia	10	4
Pelarco	Factor 3: Transparencia	10	4
Pelluhue	Factor 3: Transparencia	10	4
Pemuco	Factor 3: Transparencia	10	4
Pencahue	Factor 3: Transparencia	10	4
Penco	Factor 3: Transparencia	10	4
Peñaflor	Factor 3: Transparencia	9	4
Peñalolén	Factor 3: Transparencia	10	4
Peralillo	Factor 3: Transparencia	10	4
Perquenco	Factor 3: Transparencia	10	4
Petorca	Factor 3: Transparencia	10	4
Peumo	Factor 3: Transparencia	10	4
Pica	Factor 3: Transparencia	9	4
Pichidegua	Factor 3: Transparencia	10	4
Pichilemu	Factor 3: Transparencia	10	4
Pinto	Factor 3: Transparencia	10	4
Pirque	Factor 3: Transparencia	10	4
Pitrufquén	Factor 3: Transparencia	10	4
Placilla	Factor 3: Transparencia	9	4
Portezuelo	Factor 3: Transparencia	10	4
Porvenir	Factor 3: Transparencia	10	4
Pozo Almonte	Factor 3: Transparencia	7	4
Primavera	Factor 3: Transparencia	10	4
Providencia	Factor 3: Transparencia	10	4
Puchuncaví	Factor 3: Transparencia	4	4
Pucón	Factor 3: Transparencia	10	4
Pudahuel	Factor 3: Transparencia	10	4
Puente Alto	Factor 3: Transparencia	10	4
Puerto Montt	Factor 3: Transparencia	10	4
Puerto Octay	Factor 3: Transparencia	10	4
Puerto Varas	Factor 3: Transparencia	10	4
Pumanque	Factor 3: Transparencia	9	4
Punitaqui	Factor 3: Transparencia	10	4
Punta Arenas	Factor 3: Transparencia	10	4
Puqueldón	Factor 3: Transparencia	10	4
Purén	Factor 3: Transparencia	10	4
Purranque	Factor 3: Transparencia	10	4
Putaendo	Factor 3: Transparencia	10	4
Putre	Factor 3: Transparencia	8	4
Puyehue	Factor 3: Transparencia	10	4
Queilén	Factor 3: Transparencia	10	4
Quellón	Factor 3: Transparencia	10	4
Quemchi	Factor 3: Transparencia	10	4
Quilaco	Factor 3: Transparencia	10	4
Quilicura	Factor 3: Transparencia	10	4
Quilleco	Factor 3: Transparencia	10	4
Quillón	Factor 3: Transparencia	10	4
Quillota	Factor 3: Transparencia	10	4
Quilpué	Factor 3: Transparencia	10	4
Quinchao	Factor 3: Transparencia	10	4
Quinta De Tilcoco	Factor 3: Transparencia	10	4
Quinta Normal	Factor 3: Transparencia	10	4
Quintero	Factor 3: Transparencia	9	4
Quirihue	Factor 3: Transparencia	10	4
Rancagua	Factor 3: Transparencia	10	4
Ránquil	Factor 3: Transparencia	10	4
Rauco	Factor 3: Transparencia	10	4
Recoleta	Factor 3: Transparencia	10	4
Renaico	Factor 3: Transparencia	9	4
Renca	Factor 3: Transparencia	10	4
Rengo	Factor 3: Transparencia	10	4
Requínoa	Factor 3: Transparencia	10	4
Retiro	Factor 3: Transparencia	10	4
Rinconada	Factor 3: Transparencia	8	4
Río Bueno	Factor 3: Transparencia	10	4
Río Claro	Factor 3: Transparencia	10	4
Río Hurtado	Factor 3: Transparencia	10	4
Río Ibáñez	Factor 3: Transparencia	10	4
Río Negro	Factor 3: Transparencia	10	4
Río Verde	Factor 3: Transparencia	10	4
Romeral	Factor 3: Transparencia	10	4
Saavedra	Factor 3: Transparencia	10	4
Sagrada Familia	Factor 3: Transparencia	10	4
Salamanca	Factor 3: Transparencia	10	4
San Antonio	Factor 3: Transparencia	10	4
San Bernardo	Factor 3: Transparencia	10	4
San Carlos	Factor 3: Transparencia	10	4
San Clemente	Factor 3: Transparencia	10	4
San Esteban	Factor 3: Transparencia	10	4
San Fabián	Factor 3: Transparencia	10	4
San Felipe	Factor 3: Transparencia	10	4
San Fernando	Factor 3: Transparencia	10	4
San Gregorio	Factor 3: Transparencia	10	4
San Ignacio	Factor 3: Transparencia	10	4
San Javier	Factor 3: Transparencia	10	4
San Joaquín	Factor 3: Transparencia	10	4
San José De Maipo	Factor 3: Transparencia	10	4
San Juan De La Costa	Factor 3: Transparencia	10	4
San Miguel	Factor 3: Transparencia	10	4
San Nicolás	Factor 3: Transparencia	10	4
San Pablo	Factor 3: Transparencia	10	4
San Pedro	Factor 3: Transparencia	10	4
San Pedro De Atacama	Factor 3: Transparencia	10	4
San Pedro De La Paz	Factor 3: Transparencia	10	4
San Rafael	Factor 3: Transparencia	10	4
San Ramón	Factor 3: Transparencia	10	4
San Rosendo	Factor 3: Transparencia	10	4
San Vicente	Factor 3: Transparencia	10	4
Santa Bárbara	Factor 3: Transparencia	10	4
Santa Cruz	Factor 3: Transparencia	9	4
Santa Juana	Factor 3: Transparencia	10	4
Santa María	Factor 3: Transparencia	9	4
Santiago	Factor 3: Transparencia	10	4
Santo Domingo	Factor 3: Transparencia	10	4
Sierra Gorda	Factor 3: Transparencia	10	4
Talagante	Factor 3: Transparencia	10	4
Talca	Factor 3: Transparencia	10	4
Talcahuano	Factor 3: Transparencia	10	4
Taltal	Factor 3: Transparencia	10	4
Temuco	Factor 3: Transparencia	10	4
Teno	Factor 3: Transparencia	10	4
Teodoro Schmidt	Factor 3: Transparencia	10	4
Tierra Amarilla	Factor 3: Transparencia	10	4
Tiltil	Factor 3: Transparencia	10	4
Timaukel	Factor 3: Transparencia	10	4
Tirúa	Factor 3: Transparencia	9	4
Tocopilla	Factor 3: Transparencia	10	4
Toltén	Factor 3: Transparencia	10	4
Tomé	Factor 3: Transparencia	10	4
Torres Del Paine	Factor 3: Transparencia	10	4
Tortel	Factor 3: Transparencia	10	4
Traiguén	Factor 3: Transparencia	9	4
Treguaco	Factor 3: Transparencia	10	4
Tucapel	Factor 3: Transparencia	10	4
Valdivia	Factor 3: Transparencia	10	4
Vallenar	Factor 3: Transparencia	10	4
Valparaíso	Factor 3: Transparencia	10	4
Vichuquén	Factor 3: Transparencia	10	4
Victoria	Factor 3: Transparencia	6	4
Vicuña	Factor 3: Transparencia	10	4
Vilcún	Factor 3: Transparencia	10	4
Villa Alegre	Factor 3: Transparencia	10	4
Villa Alemana	Factor 3: Transparencia	10	4
Villarrica	Factor 3: Transparencia	10	4
Viña Del Mar	Factor 3: Transparencia	10	4
Vitacura	Factor 3: Transparencia	10	4
Yerbas Buenas	Factor 3: Transparencia	10	4
Yumbel	Factor 3: Transparencia	10	4
Yungay	Factor 3: Transparencia	10	4
Zapallar	Factor 3: Transparencia	10	4
Isla de Maipo	Factor 4: Información Educacional y de Salud	2	5
Algarrobo	Factor 4: Información Educacional y de Salud	7	5
Alhué	Factor 4: Información Educacional y de Salud	0	5
Alto Biobío	Factor 4: Información Educacional y de Salud	0	5
Alto Del Carmen	Factor 4: Información Educacional y de Salud	2	5
Alto Hospicio	Factor 4: Información Educacional y de Salud	0	5
Ancud	Factor 4: Información Educacional y de Salud	0	5
Andacollo	Factor 4: Información Educacional y de Salud	0	5
Angol	Factor 4: Información Educacional y de Salud	5	5
Antofagasta	Factor 4: Información Educacional y de Salud	3	5
Antuco	Factor 4: Información Educacional y de Salud	0	5
Arauco	Factor 4: Información Educacional y de Salud	0	5
Arica	Factor 4: Información Educacional y de Salud	2	5
Aysén	Factor 4: Información Educacional y de Salud	3	5
Buin	Factor 4: Información Educacional y de Salud	0	5
Bulnes	Factor 4: Información Educacional y de Salud	4	5
Cabildo	Factor 4: Información Educacional y de Salud	7	5
Cabo De Hornos	Factor 4: Información Educacional y de Salud	2	5
Cabrero	Factor 4: Información Educacional y de Salud	0	5
Calama	Factor 4: Información Educacional y de Salud	0	5
Calbuco	Factor 4: Información Educacional y de Salud	0	5
Caldera	Factor 4: Información Educacional y de Salud	0	5
Calera	Factor 4: Información Educacional y de Salud	2	5
Calera De Tango	Factor 4: Información Educacional y de Salud	1	5
Calle Larga	Factor 4: Información Educacional y de Salud	8	5
Camarones	Factor 4: Información Educacional y de Salud	4	5
Camiña	Factor 4: Información Educacional y de Salud	0	5
Canela	Factor 4: Información Educacional y de Salud	0	5
Cañete	Factor 4: Información Educacional y de Salud	8	5
Carahue	Factor 4: Información Educacional y de Salud	1	5
Cartagena	Factor 4: Información Educacional y de Salud	2	5
Casablanca	Factor 4: Información Educacional y de Salud	8	5
Castro	Factor 4: Información Educacional y de Salud	0	5
Catemu	Factor 4: Información Educacional y de Salud	2	5
Cauquenes	Factor 4: Información Educacional y de Salud	0	5
Cerrillos	Factor 4: Información Educacional y de Salud	0	5
Cerro Navia	Factor 4: Información Educacional y de Salud	0	5
Chaitén	Factor 4: Información Educacional y de Salud	0	5
Chanco	Factor 4: Información Educacional y de Salud	0	5
Chañaral	Factor 4: Información Educacional y de Salud	0	5
Chépica	Factor 4: Información Educacional y de Salud	6	5
Chiguayante	Factor 4: Información Educacional y de Salud	0	5
Chile Chico	Factor 4: Información Educacional y de Salud	0	5
Chillán	Factor 4: Información Educacional y de Salud	0	5
Chillán Viejo	Factor 4: Información Educacional y de Salud	0	5
Chimbarongo	Factor 4: Información Educacional y de Salud	1	5
Cholchol	Factor 4: Información Educacional y de Salud	2	5
Chonchi	Factor 4: Información Educacional y de Salud	0	5
Cisnes	Factor 4: Información Educacional y de Salud	1	5
Cobquecura	Factor 4: Información Educacional y de Salud	3	5
Cochamó	Factor 4: Información Educacional y de Salud	0	5
Cochrane	Factor 4: Información Educacional y de Salud	1	5
Codegua	Factor 4: Información Educacional y de Salud	1	5
Coelemu	Factor 4: Información Educacional y de Salud	0	5
Coihueco	Factor 4: Información Educacional y de Salud	0	5
Coinco	Factor 4: Información Educacional y de Salud	4	5
Colbún	Factor 4: Información Educacional y de Salud	3	5
Colchane	Factor 4: Información Educacional y de Salud	0	5
Colina	Factor 4: Información Educacional y de Salud	6	5
Collipulli	Factor 4: Información Educacional y de Salud	2	5
Coltauco	Factor 4: Información Educacional y de Salud	0	5
Combarbalá	Factor 4: Información Educacional y de Salud	0	5
Concepción	Factor 4: Información Educacional y de Salud	0	5
Conchalí	Factor 4: Información Educacional y de Salud	2	5
Concón	Factor 4: Información Educacional y de Salud	7	5
Constitución	Factor 4: Información Educacional y de Salud	0	5
Contulmo	Factor 4: Información Educacional y de Salud	0	5
Copiapó	Factor 4: Información Educacional y de Salud	0	5
Coquimbo	Factor 4: Información Educacional y de Salud	4	5
Coronel	Factor 4: Información Educacional y de Salud	0	5
Corral	Factor 4: Información Educacional y de Salud	4	5
Coyhaique	Factor 4: Información Educacional y de Salud	4	5
Cunco	Factor 4: Información Educacional y de Salud	2	5
Curacautín	Factor 4: Información Educacional y de Salud	5	5
Curacaví	Factor 4: Información Educacional y de Salud	0	5
Curaco De Vélez	Factor 4: Información Educacional y de Salud	0	5
Curanilahue	Factor 4: Información Educacional y de Salud	10	5
Curarrehue	Factor 4: Información Educacional y de Salud	3	5
Curepto	Factor 4: Información Educacional y de Salud	0	5
Curicó	Factor 4: Información Educacional y de Salud	5	5
Dalcahue	Factor 4: Información Educacional y de Salud	0	5
Diego De Almagro	Factor 4: Información Educacional y de Salud	2	5
Doñihue	Factor 4: Información Educacional y de Salud	0	5
El Bosque	Factor 4: Información Educacional y de Salud	5	5
El Carmen	Factor 4: Información Educacional y de Salud	0	5
El Monte	Factor 4: Información Educacional y de Salud	2	5
El Quisco	Factor 4: Información Educacional y de Salud	9	5
El Tabo	Factor 4: Información Educacional y de Salud	3	5
Empedrado	Factor 4: Información Educacional y de Salud	0	5
Ercilla	Factor 4: Información Educacional y de Salud	3	5
Estación Central	Factor 4: Información Educacional y de Salud	4	5
Florida	Factor 4: Información Educacional y de Salud	0	5
Freire	Factor 4: Información Educacional y de Salud	6	5
Freirina	Factor 4: Información Educacional y de Salud	0	5
Fresia	Factor 4: Información Educacional y de Salud	0	5
Frutillar	Factor 4: Información Educacional y de Salud	4	5
Futaleufú	Factor 4: Información Educacional y de Salud	8	5
Futrono	Factor 4: Información Educacional y de Salud	0	5
Galvarino	Factor 4: Información Educacional y de Salud	1	5
General Lagos	Factor 4: Información Educacional y de Salud	0	5
Gorbea	Factor 4: Información Educacional y de Salud	8	5
Graneros	Factor 4: Información Educacional y de Salud	0	5
Guaitecas	Factor 4: Información Educacional y de Salud	3	5
Hijuelas	Factor 4: Información Educacional y de Salud	9	5
Hualaihué	Factor 4: Información Educacional y de Salud	0	5
Hualañé	Factor 4: Información Educacional y de Salud	0	5
Hualpén	Factor 4: Información Educacional y de Salud	11	5
Hualqui	Factor 4: Información Educacional y de Salud	0	5
Huara	Factor 4: Información Educacional y de Salud	0	5
Huasco	Factor 4: Información Educacional y de Salud	0	5
Huechuraba	Factor 4: Información Educacional y de Salud	10	5
Illapel	Factor 4: Información Educacional y de Salud	0	5
Independencia	Factor 4: Información Educacional y de Salud	8	5
Iquique	Factor 4: Información Educacional y de Salud	4	5
Juan Fernández	Factor 4: Información Educacional y de Salud	7	5
La Cisterna	Factor 4: Información Educacional y de Salud	9	5
La Cruz	Factor 4: Información Educacional y de Salud	9	5
La Estrella	Factor 4: Información Educacional y de Salud	0	5
La Florida	Factor 4: Información Educacional y de Salud	0	5
La Granja	Factor 4: Información Educacional y de Salud	4	5
La Higuera	Factor 4: Información Educacional y de Salud	1	5
La Ligua	Factor 4: Información Educacional y de Salud	4	5
La Pintana	Factor 4: Información Educacional y de Salud	5	5
La Reina	Factor 4: Información Educacional y de Salud	0	5
La Serena	Factor 4: Información Educacional y de Salud	0	5
La Unión	Factor 4: Información Educacional y de Salud	8	5
Lago Ranco	Factor 4: Información Educacional y de Salud	0	5
Lago Verde	Factor 4: Información Educacional y de Salud	4	5
Laguna Blanca	Factor 4: Información Educacional y de Salud	3	5
Laja	Factor 4: Información Educacional y de Salud	4	5
Lampa	Factor 4: Información Educacional y de Salud	0	5
Lanco	Factor 4: Información Educacional y de Salud	0	5
Las Cabras	Factor 4: Información Educacional y de Salud	0	5
Las Condes	Factor 4: Información Educacional y de Salud	11	5
Lautaro	Factor 4: Información Educacional y de Salud	5	5
Lebu	Factor 4: Información Educacional y de Salud	0	5
Licantén	Factor 4: Información Educacional y de Salud	12	5
Limache	Factor 4: Información Educacional y de Salud	6	5
Linares	Factor 4: Información Educacional y de Salud	6	5
Litueche	Factor 4: Información Educacional y de Salud	7	5
Llaillay	Factor 4: Información Educacional y de Salud	3	5
Llanquihue	Factor 4: Información Educacional y de Salud	0	5
Lo Barnechea	Factor 4: Información Educacional y de Salud	11	5
Lo Espejo	Factor 4: Información Educacional y de Salud	5	5
Lo Prado	Factor 4: Información Educacional y de Salud	0	5
Lolol	Factor 4: Información Educacional y de Salud	8	5
Loncoche	Factor 4: Información Educacional y de Salud	5	5
Longaví	Factor 4: Información Educacional y de Salud	2	5
Lonquimay	Factor 4: Información Educacional y de Salud	5	5
Los Álamos	Factor 4: Información Educacional y de Salud	0	5
Los Andes	Factor 4: Información Educacional y de Salud	10	5
Los Ángeles	Factor 4: Información Educacional y de Salud	0	5
Los Lagos	Factor 4: Información Educacional y de Salud	0	5
Los Muermos	Factor 4: Información Educacional y de Salud	8	5
Los Sauces	Factor 4: Información Educacional y de Salud	4	5
Los Vilos	Factor 4: Información Educacional y de Salud	0	5
Lota	Factor 4: Información Educacional y de Salud	0	5
Lumaco	Factor 4: Información Educacional y de Salud	4	5
Machalí	Factor 4: Información Educacional y de Salud	8	5
Macul	Factor 4: Información Educacional y de Salud	0	5
Máfil	Factor 4: Información Educacional y de Salud	0	5
Maipú	Factor 4: Información Educacional y de Salud	0	5
Malloa	Factor 4: Información Educacional y de Salud	8	5
Marchihue	Factor 4: Información Educacional y de Salud	0	5
María Elena	Factor 4: Información Educacional y de Salud	1	5
María Pinto	Factor 4: Información Educacional y de Salud	0	5
Mariquina	Factor 4: Información Educacional y de Salud	3	5
Maule	Factor 4: Información Educacional y de Salud	0	5
Maullín	Factor 4: Información Educacional y de Salud	0	5
Mejillones	Factor 4: Información Educacional y de Salud	0	5
Melipeuco	Factor 4: Información Educacional y de Salud	2	5
Melipilla	Factor 4: Información Educacional y de Salud	0	5
Molina	Factor 4: Información Educacional y de Salud	0	5
Monte Patria	Factor 4: Información Educacional y de Salud	0	5
Mostazal	Factor 4: Información Educacional y de Salud	7	5
Mulchén	Factor 4: Información Educacional y de Salud	0	5
Nacimiento	Factor 4: Información Educacional y de Salud	0	5
Nancagua	Factor 4: Información Educacional y de Salud	0	5
Natales	Factor 4: Información Educacional y de Salud	0	5
Navidad	Factor 4: Información Educacional y de Salud	0	5
Negrete	Factor 4: Información Educacional y de Salud	0	5
Ninhue	Factor 4: Información Educacional y de Salud	0	5
Nogales	Factor 4: Información Educacional y de Salud	3	5
Nueva Imperial	Factor 4: Información Educacional y de Salud	4	5
Ñiquén	Factor 4: Información Educacional y de Salud	0	5
Ñuñoa	Factor 4: Información Educacional y de Salud	0	5
O'Higgins	Factor 4: Información Educacional y de Salud	6	5
Olivar	Factor 4: Información Educacional y de Salud	0	5
Ollagüe	Factor 4: Información Educacional y de Salud	0	5
Olmué	Factor 4: Información Educacional y de Salud	8	5
Osorno	Factor 4: Información Educacional y de Salud	1	5
Ovalle	Factor 4: Información Educacional y de Salud	0	5
Padre Hurtado	Factor 4: Información Educacional y de Salud	2	5
Padre Las Casas	Factor 4: Información Educacional y de Salud	5	5
Paiguano	Factor 4: Información Educacional y de Salud	0	5
Paillaco	Factor 4: Información Educacional y de Salud	4	5
Paine	Factor 4: Información Educacional y de Salud	6	5
Palena	Factor 4: Información Educacional y de Salud	0	5
Palmilla	Factor 4: Información Educacional y de Salud	0	5
Panguipulli	Factor 4: Información Educacional y de Salud	0	5
Panquehue	Factor 4: Información Educacional y de Salud	6	5
Papudo	Factor 4: Información Educacional y de Salud	10	5
Paredones	Factor 4: Información Educacional y de Salud	3	5
Parral	Factor 4: Información Educacional y de Salud	0	5
Pedro Aguirre Cerda	Factor 4: Información Educacional y de Salud	9	5
Pelarco	Factor 4: Información Educacional y de Salud	0	5
Pelluhue	Factor 4: Información Educacional y de Salud	0	5
Pemuco	Factor 4: Información Educacional y de Salud	0	5
Pencahue	Factor 4: Información Educacional y de Salud	0	5
Penco	Factor 4: Información Educacional y de Salud	0	5
Peñaflor	Factor 4: Información Educacional y de Salud	12	5
Peñalolén	Factor 4: Información Educacional y de Salud	9	5
Peralillo	Factor 4: Información Educacional y de Salud	0	5
Perquenco	Factor 4: Información Educacional y de Salud	4	5
Petorca	Factor 4: Información Educacional y de Salud	1	5
Peumo	Factor 4: Información Educacional y de Salud	0	5
Pica	Factor 4: Información Educacional y de Salud	1	5
Pichidegua	Factor 4: Información Educacional y de Salud	2	5
Pichilemu	Factor 4: Información Educacional y de Salud	0	5
Pinto	Factor 4: Información Educacional y de Salud	0	5
Pirque	Factor 4: Información Educacional y de Salud	5	5
Pitrufquén	Factor 4: Información Educacional y de Salud	5	5
Placilla	Factor 4: Información Educacional y de Salud	0	5
Portezuelo	Factor 4: Información Educacional y de Salud	0	5
Porvenir	Factor 4: Información Educacional y de Salud	0	5
Pozo Almonte	Factor 4: Información Educacional y de Salud	0	5
Primavera	Factor 4: Información Educacional y de Salud	8	5
Providencia	Factor 4: Información Educacional y de Salud	11	5
Puchuncaví	Factor 4: Información Educacional y de Salud	4	5
Pucón	Factor 4: Información Educacional y de Salud	7	5
Pudahuel	Factor 4: Información Educacional y de Salud	2	5
Puente Alto	Factor 4: Información Educacional y de Salud	7	5
Puerto Montt	Factor 4: Información Educacional y de Salud	10	5
Puerto Octay	Factor 4: Información Educacional y de Salud	0	5
Puerto Varas	Factor 4: Información Educacional y de Salud	0	5
Pumanque	Factor 4: Información Educacional y de Salud	0	5
Punitaqui	Factor 4: Información Educacional y de Salud	0	5
Punta Arenas	Factor 4: Información Educacional y de Salud	6	5
Puqueldón	Factor 4: Información Educacional y de Salud	0	5
Purén	Factor 4: Información Educacional y de Salud	2	5
Purranque	Factor 4: Información Educacional y de Salud	4	5
Putaendo	Factor 4: Información Educacional y de Salud	7	5
Putre	Factor 4: Información Educacional y de Salud	2	5
Puyehue	Factor 4: Información Educacional y de Salud	5	5
Queilén	Factor 4: Información Educacional y de Salud	0	5
Quellón	Factor 4: Información Educacional y de Salud	0	5
Quemchi	Factor 4: Información Educacional y de Salud	8	5
Quilaco	Factor 4: Información Educacional y de Salud	0	5
Quilicura	Factor 4: Información Educacional y de Salud	12	5
Quilleco	Factor 4: Información Educacional y de Salud	0	5
Quillón	Factor 4: Información Educacional y de Salud	7	5
Quillota	Factor 4: Información Educacional y de Salud	7	5
Quilpué	Factor 4: Información Educacional y de Salud	2	5
Quinchao	Factor 4: Información Educacional y de Salud	0	5
Quinta De Tilcoco	Factor 4: Información Educacional y de Salud	0	5
Quinta Normal	Factor 4: Información Educacional y de Salud	4	5
Quintero	Factor 4: Información Educacional y de Salud	1	5
Quirihue	Factor 4: Información Educacional y de Salud	2	5
Rancagua	Factor 4: Información Educacional y de Salud	0	5
Ránquil	Factor 4: Información Educacional y de Salud	5	5
Rauco	Factor 4: Información Educacional y de Salud	0	5
Recoleta	Factor 4: Información Educacional y de Salud	5	5
Renaico	Factor 4: Información Educacional y de Salud	0	5
Renca	Factor 4: Información Educacional y de Salud	8	5
Rengo	Factor 4: Información Educacional y de Salud	6	5
Requínoa	Factor 4: Información Educacional y de Salud	0	5
Retiro	Factor 4: Información Educacional y de Salud	1	5
Rinconada	Factor 4: Información Educacional y de Salud	4	5
Río Bueno	Factor 4: Información Educacional y de Salud	0	5
Río Claro	Factor 4: Información Educacional y de Salud	0	5
Río Hurtado	Factor 4: Información Educacional y de Salud	0	5
Río Ibáñez	Factor 4: Información Educacional y de Salud	2	5
Río Negro	Factor 4: Información Educacional y de Salud	1	5
Río Verde	Factor 4: Información Educacional y de Salud	4	5
Romeral	Factor 4: Información Educacional y de Salud	0	5
Saavedra	Factor 4: Información Educacional y de Salud	2	5
Sagrada Familia	Factor 4: Información Educacional y de Salud	0	5
Salamanca	Factor 4: Información Educacional y de Salud	1	5
San Antonio	Factor 4: Información Educacional y de Salud	8	5
San Bernardo	Factor 4: Información Educacional y de Salud	0	5
San Carlos	Factor 4: Información Educacional y de Salud	0	5
San Clemente	Factor 4: Información Educacional y de Salud	12	5
San Esteban	Factor 4: Información Educacional y de Salud	6	5
San Fabián	Factor 4: Información Educacional y de Salud	0	5
San Felipe	Factor 4: Información Educacional y de Salud	7	5
San Fernando	Factor 4: Información Educacional y de Salud	1	5
San Gregorio	Factor 4: Información Educacional y de Salud	3	5
San Ignacio	Factor 4: Información Educacional y de Salud	2	5
San Javier	Factor 4: Información Educacional y de Salud	8	5
San Joaquín	Factor 4: Información Educacional y de Salud	4	5
San José De Maipo	Factor 4: Información Educacional y de Salud	1	5
San Juan De La Costa	Factor 4: Información Educacional y de Salud	7	5
San Miguel	Factor 4: Información Educacional y de Salud	0	5
San Nicolás	Factor 4: Información Educacional y de Salud	0	5
San Pablo	Factor 4: Información Educacional y de Salud	0	5
San Pedro	Factor 4: Información Educacional y de Salud	5	5
San Pedro De Atacama	Factor 4: Información Educacional y de Salud	1	5
San Pedro De La Paz	Factor 4: Información Educacional y de Salud	5	5
San Rafael	Factor 4: Información Educacional y de Salud	1	5
San Ramón	Factor 4: Información Educacional y de Salud	8	5
San Rosendo	Factor 4: Información Educacional y de Salud	5	5
San Vicente	Factor 4: Información Educacional y de Salud	0	5
Santa Bárbara	Factor 4: Información Educacional y de Salud	3	5
Santa Cruz	Factor 4: Información Educacional y de Salud	0	5
Santa Juana	Factor 4: Información Educacional y de Salud	0	5
Santa María	Factor 4: Información Educacional y de Salud	7	5
Santiago	Factor 4: Información Educacional y de Salud	9	5
Santo Domingo	Factor 4: Información Educacional y de Salud	4	5
Sierra Gorda	Factor 4: Información Educacional y de Salud	7	5
Talagante	Factor 4: Información Educacional y de Salud	4	5
Talca	Factor 4: Información Educacional y de Salud	6	5
Talcahuano	Factor 4: Información Educacional y de Salud	1	5
Taltal	Factor 4: Información Educacional y de Salud	0	5
Temuco	Factor 4: Información Educacional y de Salud	9	5
Teno	Factor 4: Información Educacional y de Salud	3	5
Teodoro Schmidt	Factor 4: Información Educacional y de Salud	4	5
Tierra Amarilla	Factor 4: Información Educacional y de Salud	0	5
Tiltil	Factor 4: Información Educacional y de Salud	0	5
Timaukel	Factor 4: Información Educacional y de Salud	0	5
Tirúa	Factor 4: Información Educacional y de Salud	0	5
Tocopilla	Factor 4: Información Educacional y de Salud	0	5
Toltén	Factor 4: Información Educacional y de Salud	2	5
Tomé	Factor 4: Información Educacional y de Salud	0	5
Torres Del Paine	Factor 4: Información Educacional y de Salud	0	5
Tortel	Factor 4: Información Educacional y de Salud	1	5
Traiguén	Factor 4: Información Educacional y de Salud	4	5
Treguaco	Factor 4: Información Educacional y de Salud	0	5
Tucapel	Factor 4: Información Educacional y de Salud	2	5
Valdivia	Factor 4: Información Educacional y de Salud	8	5
Vallenar	Factor 4: Información Educacional y de Salud	0	5
Valparaíso	Factor 4: Información Educacional y de Salud	7	5
Vichuquén	Factor 4: Información Educacional y de Salud	3	5
Victoria	Factor 4: Información Educacional y de Salud	4	5
Vicuña	Factor 4: Información Educacional y de Salud	0	5
Vilcún	Factor 4: Información Educacional y de Salud	4	5
Villa Alegre	Factor 4: Información Educacional y de Salud	3	5
Villa Alemana	Factor 4: Información Educacional y de Salud	7	5
Villarrica	Factor 4: Información Educacional y de Salud	5	5
Viña Del Mar	Factor 4: Información Educacional y de Salud	0	5
Vitacura	Factor 4: Información Educacional y de Salud	10	5
Yerbas Buenas	Factor 4: Información Educacional y de Salud	3	5
Yumbel	Factor 4: Información Educacional y de Salud	2	5
Yungay	Factor 4: Información Educacional y de Salud	0	5
Zapallar	Factor 4: Información Educacional y de Salud	8	5
Isla de Maipo	Factor 5: Ley de Lobby	3	7
Algarrobo	Factor 5: Ley de Lobby	6	6
Alhué	Factor 5: Ley de Lobby	6	6
Alto Biobío	Factor 5: Ley de Lobby	6	6
Alto Del Carmen	Factor 5: Ley de Lobby	6	6
Alto Hospicio	Factor 5: Ley de Lobby	0	6
Ancud	Factor 5: Ley de Lobby	6	6
Andacollo	Factor 5: Ley de Lobby	6	6
Angol	Factor 5: Ley de Lobby	6	6
Antofagasta	Factor 5: Ley de Lobby	6	6
Antuco	Factor 5: Ley de Lobby	6	6
Arauco	Factor 5: Ley de Lobby	6	6
Arica	Factor 5: Ley de Lobby	6	6
Aysén	Factor 5: Ley de Lobby	5	6
Buin	Factor 5: Ley de Lobby	6	6
Bulnes	Factor 5: Ley de Lobby	6	6
Cabildo	Factor 5: Ley de Lobby	6	6
Cabo De Hornos	Factor 5: Ley de Lobby	5	6
Cabrero	Factor 5: Ley de Lobby	6	6
Calama	Factor 5: Ley de Lobby	0	6
Calbuco	Factor 5: Ley de Lobby	6	6
Caldera	Factor 5: Ley de Lobby	1	6
Calera	Factor 5: Ley de Lobby	5	6
Calera De Tango	Factor 5: Ley de Lobby	0	6
Calle Larga	Factor 5: Ley de Lobby	4	6
Camarones	Factor 5: Ley de Lobby	6	6
Camiña	Factor 5: Ley de Lobby	0	6
Canela	Factor 5: Ley de Lobby	0	6
Cañete	Factor 5: Ley de Lobby	6	6
Carahue	Factor 5: Ley de Lobby	0	6
Cartagena	Factor 5: Ley de Lobby	5	6
Casablanca	Factor 5: Ley de Lobby	6	6
Castro	Factor 5: Ley de Lobby	6	6
Catemu	Factor 5: Ley de Lobby	5	6
Cauquenes	Factor 5: Ley de Lobby	6	6
Cerrillos	Factor 5: Ley de Lobby	6	6
Cerro Navia	Factor 5: Ley de Lobby	6	6
Chaitén	Factor 5: Ley de Lobby	6	6
Chanco	Factor 5: Ley de Lobby	6	6
Chañaral	Factor 5: Ley de Lobby	0	6
Chépica	Factor 5: Ley de Lobby	6	6
Chiguayante	Factor 5: Ley de Lobby	6	6
Chile Chico	Factor 5: Ley de Lobby	6	6
Chillán	Factor 5: Ley de Lobby	6	6
Chillán Viejo	Factor 5: Ley de Lobby	0	6
Chimbarongo	Factor 5: Ley de Lobby	6	6
Cholchol	Factor 5: Ley de Lobby	5	6
Chonchi	Factor 5: Ley de Lobby	6	6
Cisnes	Factor 5: Ley de Lobby	5	6
Cobquecura	Factor 5: Ley de Lobby	0	6
Cochamó	Factor 5: Ley de Lobby	6	6
Cochrane	Factor 5: Ley de Lobby	4	6
Codegua	Factor 5: Ley de Lobby	6	6
Coelemu	Factor 5: Ley de Lobby	0	6
Coihueco	Factor 5: Ley de Lobby	0	6
Coinco	Factor 5: Ley de Lobby	6	6
Colbún	Factor 5: Ley de Lobby	6	6
Colchane	Factor 5: Ley de Lobby	0	6
Colina	Factor 5: Ley de Lobby	6	6
Collipulli	Factor 5: Ley de Lobby	5	6
Coltauco	Factor 5: Ley de Lobby	6	6
Combarbalá	Factor 5: Ley de Lobby	6	6
Concepción	Factor 5: Ley de Lobby	6	6
Conchalí	Factor 5: Ley de Lobby	6	6
Concón	Factor 5: Ley de Lobby	6	6
Constitución	Factor 5: Ley de Lobby	6	6
Contulmo	Factor 5: Ley de Lobby	6	6
Copiapó	Factor 5: Ley de Lobby	6	6
Coquimbo	Factor 5: Ley de Lobby	6	6
Coronel	Factor 5: Ley de Lobby	6	6
Corral	Factor 5: Ley de Lobby	6	6
Coyhaique	Factor 5: Ley de Lobby	5	6
Cunco	Factor 5: Ley de Lobby	4	6
Curacautín	Factor 5: Ley de Lobby	4	6
Curacaví	Factor 5: Ley de Lobby	6	6
Curaco De Vélez	Factor 5: Ley de Lobby	6	6
Curanilahue	Factor 5: Ley de Lobby	6	6
Curarrehue	Factor 5: Ley de Lobby	5	6
Curepto	Factor 5: Ley de Lobby	6	6
Curicó	Factor 5: Ley de Lobby	6	6
Dalcahue	Factor 5: Ley de Lobby	6	6
Diego De Almagro	Factor 5: Ley de Lobby	6	6
Doñihue	Factor 5: Ley de Lobby	6	6
El Bosque	Factor 5: Ley de Lobby	6	6
El Carmen	Factor 5: Ley de Lobby	6	6
El Monte	Factor 5: Ley de Lobby	6	6
El Quisco	Factor 5: Ley de Lobby	5	6
El Tabo	Factor 5: Ley de Lobby	4	6
Empedrado	Factor 5: Ley de Lobby	0	6
Ercilla	Factor 5: Ley de Lobby	5	6
Estación Central	Factor 5: Ley de Lobby	6	6
Florida	Factor 5: Ley de Lobby	6	6
Freire	Factor 5: Ley de Lobby	5	6
Freirina	Factor 5: Ley de Lobby	6	6
Fresia	Factor 5: Ley de Lobby	6	6
Frutillar	Factor 5: Ley de Lobby	6	6
Futaleufú	Factor 5: Ley de Lobby	6	6
Futrono	Factor 5: Ley de Lobby	6	6
Galvarino	Factor 5: Ley de Lobby	5	6
General Lagos	Factor 5: Ley de Lobby	6	6
Gorbea	Factor 5: Ley de Lobby	5	6
Graneros	Factor 5: Ley de Lobby	6	6
Guaitecas	Factor 5: Ley de Lobby	4	6
Hijuelas	Factor 5: Ley de Lobby	5	6
Hualaihué	Factor 5: Ley de Lobby	6	6
Hualañé	Factor 5: Ley de Lobby	6	6
Hualpén	Factor 5: Ley de Lobby	6	6
Hualqui	Factor 5: Ley de Lobby	6	6
Huara	Factor 5: Ley de Lobby	0	6
Huasco	Factor 5: Ley de Lobby	6	6
Huechuraba	Factor 5: Ley de Lobby	6	6
Illapel	Factor 5: Ley de Lobby	6	6
Independencia	Factor 5: Ley de Lobby	6	6
Iquique	Factor 5: Ley de Lobby	6	6
Juan Fernández	Factor 5: Ley de Lobby	4	6
La Cisterna	Factor 5: Ley de Lobby	6	6
La Cruz	Factor 5: Ley de Lobby	6	6
La Estrella	Factor 5: Ley de Lobby	6	6
La Florida	Factor 5: Ley de Lobby	6	6
La Granja	Factor 5: Ley de Lobby	6	6
La Higuera	Factor 5: Ley de Lobby	6	6
La Ligua	Factor 5: Ley de Lobby	5	6
La Pintana	Factor 5: Ley de Lobby	6	6
La Reina	Factor 5: Ley de Lobby	6	6
La Serena	Factor 5: Ley de Lobby	6	6
La Unión	Factor 5: Ley de Lobby	6	6
Lago Ranco	Factor 5: Ley de Lobby	6	6
Lago Verde	Factor 5: Ley de Lobby	3	6
Laguna Blanca	Factor 5: Ley de Lobby	3	6
Laja	Factor 5: Ley de Lobby	6	6
Lampa	Factor 5: Ley de Lobby	6	6
Lanco	Factor 5: Ley de Lobby	6	6
Las Cabras	Factor 5: Ley de Lobby	0	6
Las Condes	Factor 5: Ley de Lobby	6	6
Lautaro	Factor 5: Ley de Lobby	5	6
Lebu	Factor 5: Ley de Lobby	6	6
Licantén	Factor 5: Ley de Lobby	6	6
Limache	Factor 5: Ley de Lobby	5	6
Linares	Factor 5: Ley de Lobby	6	6
Litueche	Factor 5: Ley de Lobby	6	6
Llaillay	Factor 5: Ley de Lobby	4	6
Llanquihue	Factor 5: Ley de Lobby	6	6
Lo Barnechea	Factor 5: Ley de Lobby	6	6
Lo Espejo	Factor 5: Ley de Lobby	6	6
Lo Prado	Factor 5: Ley de Lobby	6	6
Lolol	Factor 5: Ley de Lobby	6	6
Loncoche	Factor 5: Ley de Lobby	4	6
Longaví	Factor 5: Ley de Lobby	0	6
Lonquimay	Factor 5: Ley de Lobby	5	6
Los Álamos	Factor 5: Ley de Lobby	6	6
Los Andes	Factor 5: Ley de Lobby	5	6
Los Ángeles	Factor 5: Ley de Lobby	6	6
Los Lagos	Factor 5: Ley de Lobby	6	6
Los Muermos	Factor 5: Ley de Lobby	6	6
Los Sauces	Factor 5: Ley de Lobby	5	6
Los Vilos	Factor 5: Ley de Lobby	6	6
Lota	Factor 5: Ley de Lobby	6	6
Lumaco	Factor 5: Ley de Lobby	3	6
Machalí	Factor 5: Ley de Lobby	0	6
Macul	Factor 5: Ley de Lobby	6	6
Máfil	Factor 5: Ley de Lobby	6	6
Maipú	Factor 5: Ley de Lobby	6	6
Malloa	Factor 5: Ley de Lobby	6	6
Marchihue	Factor 5: Ley de Lobby	6	6
María Elena	Factor 5: Ley de Lobby	6	6
María Pinto	Factor 5: Ley de Lobby	6	6
Mariquina	Factor 5: Ley de Lobby	0	6
Maule	Factor 5: Ley de Lobby	6	6
Maullín	Factor 5: Ley de Lobby	6	6
Mejillones	Factor 5: Ley de Lobby	0	6
Melipeuco	Factor 5: Ley de Lobby	5	6
Melipilla	Factor 5: Ley de Lobby	6	6
Molina	Factor 5: Ley de Lobby	6	6
Monte Patria	Factor 5: Ley de Lobby	6	6
Mostazal	Factor 5: Ley de Lobby	6	6
Mulchén	Factor 5: Ley de Lobby	6	6
Nacimiento	Factor 5: Ley de Lobby	6	6
Nancagua	Factor 5: Ley de Lobby	6	6
Natales	Factor 5: Ley de Lobby	6	6
Navidad	Factor 5: Ley de Lobby	6	6
Negrete	Factor 5: Ley de Lobby	6	6
Ninhue	Factor 5: Ley de Lobby	0	6
Nogales	Factor 5: Ley de Lobby	5	6
Nueva Imperial	Factor 5: Ley de Lobby	5	6
Ñiquén	Factor 5: Ley de Lobby	0	6
Ñuñoa	Factor 5: Ley de Lobby	0	6
O'Higgins	Factor 5: Ley de Lobby	5	6
Olivar	Factor 5: Ley de Lobby	6	6
Ollagüe	Factor 5: Ley de Lobby	0	6
Olmué	Factor 5: Ley de Lobby	5	6
Osorno	Factor 5: Ley de Lobby	6	6
Ovalle	Factor 5: Ley de Lobby	6	6
Padre Hurtado	Factor 5: Ley de Lobby	6	6
Padre Las Casas	Factor 5: Ley de Lobby	5	6
Paiguano	Factor 5: Ley de Lobby	6	6
Paillaco	Factor 5: Ley de Lobby	6	6
Paine	Factor 5: Ley de Lobby	6	6
Palena	Factor 5: Ley de Lobby	6	6
Palmilla	Factor 5: Ley de Lobby	6	6
Panguipulli	Factor 5: Ley de Lobby	6	6
Panquehue	Factor 5: Ley de Lobby	5	6
Papudo	Factor 5: Ley de Lobby	4	6
Paredones	Factor 5: Ley de Lobby	6	6
Parral	Factor 5: Ley de Lobby	6	6
Pedro Aguirre Cerda	Factor 5: Ley de Lobby	6	6
Pelarco	Factor 5: Ley de Lobby	6	6
Pelluhue	Factor 5: Ley de Lobby	6	6
Pemuco	Factor 5: Ley de Lobby	6	6
Pencahue	Factor 5: Ley de Lobby	0	6
Penco	Factor 5: Ley de Lobby	6	6
Peñaflor	Factor 5: Ley de Lobby	6	6
Peñalolén	Factor 5: Ley de Lobby	6	6
Peralillo	Factor 5: Ley de Lobby	0	6
Perquenco	Factor 5: Ley de Lobby	4	6
Petorca	Factor 5: Ley de Lobby	5	6
Peumo	Factor 5: Ley de Lobby	0	6
Pica	Factor 5: Ley de Lobby	6	6
Pichidegua	Factor 5: Ley de Lobby	0	6
Pichilemu	Factor 5: Ley de Lobby	6	6
Pinto	Factor 5: Ley de Lobby	6	6
Pirque	Factor 5: Ley de Lobby	6	6
Pitrufquén	Factor 5: Ley de Lobby	6	6
Placilla	Factor 5: Ley de Lobby	6	6
Portezuelo	Factor 5: Ley de Lobby	0	6
Porvenir	Factor 5: Ley de Lobby	6	6
Pozo Almonte	Factor 5: Ley de Lobby	6	6
Primavera	Factor 5: Ley de Lobby	6	6
Providencia	Factor 5: Ley de Lobby	0	6
Puchuncaví	Factor 5: Ley de Lobby	5	6
Pucón	Factor 5: Ley de Lobby	5	6
Pudahuel	Factor 5: Ley de Lobby	6	6
Puente Alto	Factor 5: Ley de Lobby	6	6
Puerto Montt	Factor 5: Ley de Lobby	6	6
Puerto Octay	Factor 5: Ley de Lobby	6	6
Puerto Varas	Factor 5: Ley de Lobby	6	6
Pumanque	Factor 5: Ley de Lobby	6	6
Punitaqui	Factor 5: Ley de Lobby	6	6
Punta Arenas	Factor 5: Ley de Lobby	5	6
Puqueldón	Factor 5: Ley de Lobby	6	6
Purén	Factor 5: Ley de Lobby	5	6
Purranque	Factor 5: Ley de Lobby	6	6
Putaendo	Factor 5: Ley de Lobby	6	6
Putre	Factor 5: Ley de Lobby	3	6
Puyehue	Factor 5: Ley de Lobby	6	6
Queilén	Factor 5: Ley de Lobby	6	6
Quellón	Factor 5: Ley de Lobby	6	6
Quemchi	Factor 5: Ley de Lobby	6	6
Quilaco	Factor 5: Ley de Lobby	6	6
Quilicura	Factor 5: Ley de Lobby	6	6
Quilleco	Factor 5: Ley de Lobby	6	6
Quillón	Factor 5: Ley de Lobby	6	6
Quillota	Factor 5: Ley de Lobby	5	6
Quilpué	Factor 5: Ley de Lobby	5	6
Quinchao	Factor 5: Ley de Lobby	6	6
Quinta De Tilcoco	Factor 5: Ley de Lobby	0	6
Quinta Normal	Factor 5: Ley de Lobby	0	6
Quintero	Factor 5: Ley de Lobby	4	6
Quirihue	Factor 5: Ley de Lobby	6	6
Rancagua	Factor 5: Ley de Lobby	6	6
Ránquil	Factor 5: Ley de Lobby	6	6
Rauco	Factor 5: Ley de Lobby	6	6
Recoleta	Factor 5: Ley de Lobby	0	6
Renaico	Factor 5: Ley de Lobby	5	6
Renca	Factor 5: Ley de Lobby	6	6
Rengo	Factor 5: Ley de Lobby	6	6
Requínoa	Factor 5: Ley de Lobby	0	6
Retiro	Factor 5: Ley de Lobby	6	6
Rinconada	Factor 5: Ley de Lobby	5	6
Río Bueno	Factor 5: Ley de Lobby	6	6
Río Claro	Factor 5: Ley de Lobby	6	6
Río Hurtado	Factor 5: Ley de Lobby	0	6
Río Ibáñez	Factor 5: Ley de Lobby	4	6
Río Negro	Factor 5: Ley de Lobby	6	6
Río Verde	Factor 5: Ley de Lobby	5	6
Romeral	Factor 5: Ley de Lobby	6	6
Saavedra	Factor 5: Ley de Lobby	5	6
Sagrada Familia	Factor 5: Ley de Lobby	6	6
Salamanca	Factor 5: Ley de Lobby	6	6
San Antonio	Factor 5: Ley de Lobby	5	6
San Bernardo	Factor 5: Ley de Lobby	6	6
San Carlos	Factor 5: Ley de Lobby	0	6
San Clemente	Factor 5: Ley de Lobby	6	6
San Esteban	Factor 5: Ley de Lobby	5	6
San Fabián	Factor 5: Ley de Lobby	6	6
San Felipe	Factor 5: Ley de Lobby	5	6
San Fernando	Factor 5: Ley de Lobby	6	6
San Gregorio	Factor 5: Ley de Lobby	5	6
San Ignacio	Factor 5: Ley de Lobby	6	6
San Javier	Factor 5: Ley de Lobby	6	6
San Joaquín	Factor 5: Ley de Lobby	6	6
San José De Maipo	Factor 5: Ley de Lobby	6	6
San Juan De La Costa	Factor 5: Ley de Lobby	6	6
San Miguel	Factor 5: Ley de Lobby	6	6
San Nicolás	Factor 5: Ley de Lobby	6	6
San Pablo	Factor 5: Ley de Lobby	6	6
San Pedro	Factor 5: Ley de Lobby	6	6
San Pedro De Atacama	Factor 5: Ley de Lobby	6	6
San Pedro De La Paz	Factor 5: Ley de Lobby	1	6
San Rafael	Factor 5: Ley de Lobby	6	6
San Ramón	Factor 5: Ley de Lobby	0	6
San Rosendo	Factor 5: Ley de Lobby	0	6
San Vicente	Factor 5: Ley de Lobby	0	6
Santa Bárbara	Factor 5: Ley de Lobby	6	6
Santa Cruz	Factor 5: Ley de Lobby	0	6
Santa Juana	Factor 5: Ley de Lobby	1	6
Santa María	Factor 5: Ley de Lobby	5	6
Santiago	Factor 5: Ley de Lobby	6	6
Santo Domingo	Factor 5: Ley de Lobby	4	6
Sierra Gorda	Factor 5: Ley de Lobby	6	6
Talagante	Factor 5: Ley de Lobby	6	6
Talca	Factor 5: Ley de Lobby	6	6
Talcahuano	Factor 5: Ley de Lobby	6	6
Taltal	Factor 5: Ley de Lobby	0	6
Temuco	Factor 5: Ley de Lobby	0	6
Teno	Factor 5: Ley de Lobby	6	6
Teodoro Schmidt	Factor 5: Ley de Lobby	5	6
Tierra Amarilla	Factor 5: Ley de Lobby	6	6
Tiltil	Factor 5: Ley de Lobby	6	6
Timaukel	Factor 5: Ley de Lobby	6	6
Tirúa	Factor 5: Ley de Lobby	6	6
Tocopilla	Factor 5: Ley de Lobby	6	6
Toltén	Factor 5: Ley de Lobby	5	6
Tomé	Factor 5: Ley de Lobby	0	6
Torres Del Paine	Factor 5: Ley de Lobby	6	6
Tortel	Factor 5: Ley de Lobby	2	6
Traiguén	Factor 5: Ley de Lobby	5	6
Treguaco	Factor 5: Ley de Lobby	0	6
Tucapel	Factor 5: Ley de Lobby	6	6
Valdivia	Factor 5: Ley de Lobby	6	6
Vallenar	Factor 5: Ley de Lobby	6	6
Valparaíso	Factor 5: Ley de Lobby	6	6
Vichuquén	Factor 5: Ley de Lobby	6	6
Victoria	Factor 5: Ley de Lobby	6	6
Vicuña	Factor 5: Ley de Lobby	6	6
Vilcún	Factor 5: Ley de Lobby	5	6
Villa Alegre	Factor 5: Ley de Lobby	6	6
Villa Alemana	Factor 5: Ley de Lobby	0	6
Villarrica	Factor 5: Ley de Lobby	5	6
Viña Del Mar	Factor 5: Ley de Lobby	5	6
Vitacura	Factor 5: Ley de Lobby	6	6
Yerbas Buenas	Factor 5: Ley de Lobby	6	6
Yumbel	Factor 5: Ley de Lobby	6	6
Yungay	Factor 5: Ley de Lobby	6	6
Zapallar	Factor 5: Ley de Lobby	5	6
Isla de Maipo	Factor 6: Concejo Comunal de Organizaciones de la Sociedad Civil (COSOC)	3	7
Algarrobo	Factor 6: Concejo Comunal de Organizaciones de la Sociedad Civil (COSOC)	3	7
Alhué	Factor 6: Concejo Comunal de Organizaciones de la Sociedad Civil (COSOC)	0	7
Alto Biobío	Factor 6: Concejo Comunal de Organizaciones de la Sociedad Civil (COSOC)	0	7
Alto Del Carmen	Factor 6: Concejo Comunal de Organizaciones de la Sociedad Civil (COSOC)	0	7
Alto Hospicio	Factor 6: Concejo Comunal de Organizaciones de la Sociedad Civil (COSOC)	1	7
Ancud	Factor 6: Concejo Comunal de Organizaciones de la Sociedad Civil (COSOC)	1	7
Andacollo	Factor 6: Concejo Comunal de Organizaciones de la Sociedad Civil (COSOC)	1	7
Angol	Factor 6: Concejo Comunal de Organizaciones de la Sociedad Civil (COSOC)	5	7
Antofagasta	Factor 6: Concejo Comunal de Organizaciones de la Sociedad Civil (COSOC)	6	7
Antuco	Factor 6: Concejo Comunal de Organizaciones de la Sociedad Civil (COSOC)	6	7
Arauco	Factor 6: Concejo Comunal de Organizaciones de la Sociedad Civil (COSOC)	6	7
Arica	Factor 6: Concejo Comunal de Organizaciones de la Sociedad Civil (COSOC)	2	7
Aysén	Factor 6: Concejo Comunal de Organizaciones de la Sociedad Civil (COSOC)	5	7
Buin	Factor 6: Concejo Comunal de Organizaciones de la Sociedad Civil (COSOC)	1	7
Bulnes	Factor 6: Concejo Comunal de Organizaciones de la Sociedad Civil (COSOC)	0	7
Cabildo	Factor 6: Concejo Comunal de Organizaciones de la Sociedad Civil (COSOC)	2	7
Cabo De Hornos	Factor 6: Concejo Comunal de Organizaciones de la Sociedad Civil (COSOC)	3	7
Cabrero	Factor 6: Concejo Comunal de Organizaciones de la Sociedad Civil (COSOC)	0	7
Calama	Factor 6: Concejo Comunal de Organizaciones de la Sociedad Civil (COSOC)	0	7
Calbuco	Factor 6: Concejo Comunal de Organizaciones de la Sociedad Civil (COSOC)	0	7
Caldera	Factor 6: Concejo Comunal de Organizaciones de la Sociedad Civil (COSOC)	6	7
Calera	Factor 6: Concejo Comunal de Organizaciones de la Sociedad Civil (COSOC)	5	7
Calera De Tango	Factor 6: Concejo Comunal de Organizaciones de la Sociedad Civil (COSOC)	0	7
Calle Larga	Factor 6: Concejo Comunal de Organizaciones de la Sociedad Civil (COSOC)	1	7
Camarones	Factor 6: Concejo Comunal de Organizaciones de la Sociedad Civil (COSOC)	3	7
Camiña	Factor 6: Concejo Comunal de Organizaciones de la Sociedad Civil (COSOC)	0	7
Canela	Factor 6: Concejo Comunal de Organizaciones de la Sociedad Civil (COSOC)	0	7
Cañete	Factor 6: Concejo Comunal de Organizaciones de la Sociedad Civil (COSOC)	1	7
Carahue	Factor 6: Concejo Comunal de Organizaciones de la Sociedad Civil (COSOC)	3	7
Cartagena	Factor 6: Concejo Comunal de Organizaciones de la Sociedad Civil (COSOC)	3	7
Casablanca	Factor 6: Concejo Comunal de Organizaciones de la Sociedad Civil (COSOC)	3	7
Castro	Factor 6: Concejo Comunal de Organizaciones de la Sociedad Civil (COSOC)	0	7
Catemu	Factor 6: Concejo Comunal de Organizaciones de la Sociedad Civil (COSOC)	1	7
Cauquenes	Factor 6: Concejo Comunal de Organizaciones de la Sociedad Civil (COSOC)	0	7
Cerrillos	Factor 6: Concejo Comunal de Organizaciones de la Sociedad Civil (COSOC)	6	7
Cerro Navia	Factor 6: Concejo Comunal de Organizaciones de la Sociedad Civil (COSOC)	1	7
Chaitén	Factor 6: Concejo Comunal de Organizaciones de la Sociedad Civil (COSOC)	0	7
Chanco	Factor 6: Concejo Comunal de Organizaciones de la Sociedad Civil (COSOC)	0	7
Chañaral	Factor 6: Concejo Comunal de Organizaciones de la Sociedad Civil (COSOC)	1	7
Chépica	Factor 6: Concejo Comunal de Organizaciones de la Sociedad Civil (COSOC)	1	7
Chiguayante	Factor 6: Concejo Comunal de Organizaciones de la Sociedad Civil (COSOC)	1	7
Chile Chico	Factor 6: Concejo Comunal de Organizaciones de la Sociedad Civil (COSOC)	0	7
Chillán	Factor 6: Concejo Comunal de Organizaciones de la Sociedad Civil (COSOC)	0	7
Chillán Viejo	Factor 6: Concejo Comunal de Organizaciones de la Sociedad Civil (COSOC)	0	7
Chimbarongo	Factor 6: Concejo Comunal de Organizaciones de la Sociedad Civil (COSOC)	0	7
Cholchol	Factor 6: Concejo Comunal de Organizaciones de la Sociedad Civil (COSOC)	4	7
Chonchi	Factor 6: Concejo Comunal de Organizaciones de la Sociedad Civil (COSOC)	0	7
Cisnes	Factor 6: Concejo Comunal de Organizaciones de la Sociedad Civil (COSOC)	2	7
Cobquecura	Factor 6: Concejo Comunal de Organizaciones de la Sociedad Civil (COSOC)	6	7
Cochamó	Factor 6: Concejo Comunal de Organizaciones de la Sociedad Civil (COSOC)	0	7
Cochrane	Factor 6: Concejo Comunal de Organizaciones de la Sociedad Civil (COSOC)	3	7
Codegua	Factor 6: Concejo Comunal de Organizaciones de la Sociedad Civil (COSOC)	1	7
Coelemu	Factor 6: Concejo Comunal de Organizaciones de la Sociedad Civil (COSOC)	0	7
Coihueco	Factor 6: Concejo Comunal de Organizaciones de la Sociedad Civil (COSOC)	0	7
Coinco	Factor 6: Concejo Comunal de Organizaciones de la Sociedad Civil (COSOC)	1	7
Colbún	Factor 6: Concejo Comunal de Organizaciones de la Sociedad Civil (COSOC)	1	7
Colchane	Factor 6: Concejo Comunal de Organizaciones de la Sociedad Civil (COSOC)	0	7
Colina	Factor 6: Concejo Comunal de Organizaciones de la Sociedad Civil (COSOC)	0	7
Collipulli	Factor 6: Concejo Comunal de Organizaciones de la Sociedad Civil (COSOC)	3	7
Coltauco	Factor 6: Concejo Comunal de Organizaciones de la Sociedad Civil (COSOC)	0	7
Combarbalá	Factor 6: Concejo Comunal de Organizaciones de la Sociedad Civil (COSOC)	0	7
Concepción	Factor 6: Concejo Comunal de Organizaciones de la Sociedad Civil (COSOC)	1	7
Conchalí	Factor 6: Concejo Comunal de Organizaciones de la Sociedad Civil (COSOC)	1	7
Concón	Factor 6: Concejo Comunal de Organizaciones de la Sociedad Civil (COSOC)	1	7
Constitución	Factor 6: Concejo Comunal de Organizaciones de la Sociedad Civil (COSOC)	0	7
Contulmo	Factor 6: Concejo Comunal de Organizaciones de la Sociedad Civil (COSOC)	0	7
Copiapó	Factor 6: Concejo Comunal de Organizaciones de la Sociedad Civil (COSOC)	1	7
Coquimbo	Factor 6: Concejo Comunal de Organizaciones de la Sociedad Civil (COSOC)	1	7
Coronel	Factor 6: Concejo Comunal de Organizaciones de la Sociedad Civil (COSOC)	1	7
Corral	Factor 6: Concejo Comunal de Organizaciones de la Sociedad Civil (COSOC)	1	7
Coyhaique	Factor 6: Concejo Comunal de Organizaciones de la Sociedad Civil (COSOC)	4	7
Cunco	Factor 6: Concejo Comunal de Organizaciones de la Sociedad Civil (COSOC)	1	7
Curacautín	Factor 6: Concejo Comunal de Organizaciones de la Sociedad Civil (COSOC)	3	7
Curacaví	Factor 6: Concejo Comunal de Organizaciones de la Sociedad Civil (COSOC)	6	7
Curaco De Vélez	Factor 6: Concejo Comunal de Organizaciones de la Sociedad Civil (COSOC)	0	7
Curanilahue	Factor 6: Concejo Comunal de Organizaciones de la Sociedad Civil (COSOC)	1	7
Curarrehue	Factor 6: Concejo Comunal de Organizaciones de la Sociedad Civil (COSOC)	3	7
Curepto	Factor 6: Concejo Comunal de Organizaciones de la Sociedad Civil (COSOC)	0	7
Curicó	Factor 6: Concejo Comunal de Organizaciones de la Sociedad Civil (COSOC)	1	7
Dalcahue	Factor 6: Concejo Comunal de Organizaciones de la Sociedad Civil (COSOC)	1	7
Diego De Almagro	Factor 6: Concejo Comunal de Organizaciones de la Sociedad Civil (COSOC)	0	7
Doñihue	Factor 6: Concejo Comunal de Organizaciones de la Sociedad Civil (COSOC)	0	7
El Bosque	Factor 6: Concejo Comunal de Organizaciones de la Sociedad Civil (COSOC)	1	7
El Carmen	Factor 6: Concejo Comunal de Organizaciones de la Sociedad Civil (COSOC)	0	7
El Monte	Factor 6: Concejo Comunal de Organizaciones de la Sociedad Civil (COSOC)	1	7
El Quisco	Factor 6: Concejo Comunal de Organizaciones de la Sociedad Civil (COSOC)	5	7
El Tabo	Factor 6: Concejo Comunal de Organizaciones de la Sociedad Civil (COSOC)	1	7
Empedrado	Factor 6: Concejo Comunal de Organizaciones de la Sociedad Civil (COSOC)	0	7
Ercilla	Factor 6: Concejo Comunal de Organizaciones de la Sociedad Civil (COSOC)	3	7
Estación Central	Factor 6: Concejo Comunal de Organizaciones de la Sociedad Civil (COSOC)	1	7
Florida	Factor 6: Concejo Comunal de Organizaciones de la Sociedad Civil (COSOC)	1	7
Freire	Factor 6: Concejo Comunal de Organizaciones de la Sociedad Civil (COSOC)	3	7
Freirina	Factor 6: Concejo Comunal de Organizaciones de la Sociedad Civil (COSOC)	0	7
Fresia	Factor 6: Concejo Comunal de Organizaciones de la Sociedad Civil (COSOC)	6	7
Frutillar	Factor 6: Concejo Comunal de Organizaciones de la Sociedad Civil (COSOC)	1	7
Futaleufú	Factor 6: Concejo Comunal de Organizaciones de la Sociedad Civil (COSOC)	6	7
Futrono	Factor 6: Concejo Comunal de Organizaciones de la Sociedad Civil (COSOC)	6	7
Galvarino	Factor 6: Concejo Comunal de Organizaciones de la Sociedad Civil (COSOC)	3	7
General Lagos	Factor 6: Concejo Comunal de Organizaciones de la Sociedad Civil (COSOC)	1	7
Gorbea	Factor 6: Concejo Comunal de Organizaciones de la Sociedad Civil (COSOC)	4	7
Graneros	Factor 6: Concejo Comunal de Organizaciones de la Sociedad Civil (COSOC)	0	7
Guaitecas	Factor 6: Concejo Comunal de Organizaciones de la Sociedad Civil (COSOC)	3	7
Hijuelas	Factor 6: Concejo Comunal de Organizaciones de la Sociedad Civil (COSOC)	1	7
Hualaihué	Factor 6: Concejo Comunal de Organizaciones de la Sociedad Civil (COSOC)	0	7
Hualañé	Factor 6: Concejo Comunal de Organizaciones de la Sociedad Civil (COSOC)	0	7
Hualpén	Factor 6: Concejo Comunal de Organizaciones de la Sociedad Civil (COSOC)	0	7
Hualqui	Factor 6: Concejo Comunal de Organizaciones de la Sociedad Civil (COSOC)	1	7
Huara	Factor 6: Concejo Comunal de Organizaciones de la Sociedad Civil (COSOC)	0	7
Huasco	Factor 6: Concejo Comunal de Organizaciones de la Sociedad Civil (COSOC)	1	7
Huechuraba	Factor 6: Concejo Comunal de Organizaciones de la Sociedad Civil (COSOC)	6	7
Illapel	Factor 6: Concejo Comunal de Organizaciones de la Sociedad Civil (COSOC)	0	7
Independencia	Factor 6: Concejo Comunal de Organizaciones de la Sociedad Civil (COSOC)	1	7
Iquique	Factor 6: Concejo Comunal de Organizaciones de la Sociedad Civil (COSOC)	4	7
Juan Fernández	Factor 6: Concejo Comunal de Organizaciones de la Sociedad Civil (COSOC)	0	7
La Cisterna	Factor 6: Concejo Comunal de Organizaciones de la Sociedad Civil (COSOC)	1	7
La Cruz	Factor 6: Concejo Comunal de Organizaciones de la Sociedad Civil (COSOC)	4	7
La Estrella	Factor 6: Concejo Comunal de Organizaciones de la Sociedad Civil (COSOC)	1	7
La Florida	Factor 6: Concejo Comunal de Organizaciones de la Sociedad Civil (COSOC)	1	7
La Granja	Factor 6: Concejo Comunal de Organizaciones de la Sociedad Civil (COSOC)	0	7
La Higuera	Factor 6: Concejo Comunal de Organizaciones de la Sociedad Civil (COSOC)	0	7
La Ligua	Factor 6: Concejo Comunal de Organizaciones de la Sociedad Civil (COSOC)	3	7
La Pintana	Factor 6: Concejo Comunal de Organizaciones de la Sociedad Civil (COSOC)	1	7
La Reina	Factor 6: Concejo Comunal de Organizaciones de la Sociedad Civil (COSOC)	6	7
La Serena	Factor 6: Concejo Comunal de Organizaciones de la Sociedad Civil (COSOC)	0	7
La Unión	Factor 6: Concejo Comunal de Organizaciones de la Sociedad Civil (COSOC)	1	7
Lago Ranco	Factor 6: Concejo Comunal de Organizaciones de la Sociedad Civil (COSOC)	0	7
Lago Verde	Factor 6: Concejo Comunal de Organizaciones de la Sociedad Civil (COSOC)	1	7
Laguna Blanca	Factor 6: Concejo Comunal de Organizaciones de la Sociedad Civil (COSOC)	3	7
Laja	Factor 6: Concejo Comunal de Organizaciones de la Sociedad Civil (COSOC)	0	7
Lampa	Factor 6: Concejo Comunal de Organizaciones de la Sociedad Civil (COSOC)	1	7
Lanco	Factor 6: Concejo Comunal de Organizaciones de la Sociedad Civil (COSOC)	0	7
Las Cabras	Factor 6: Concejo Comunal de Organizaciones de la Sociedad Civil (COSOC)	0	7
Las Condes	Factor 6: Concejo Comunal de Organizaciones de la Sociedad Civil (COSOC)	6	7
Lautaro	Factor 6: Concejo Comunal de Organizaciones de la Sociedad Civil (COSOC)	2	7
Lebu	Factor 6: Concejo Comunal de Organizaciones de la Sociedad Civil (COSOC)	0	7
Licantén	Factor 6: Concejo Comunal de Organizaciones de la Sociedad Civil (COSOC)	1	7
Limache	Factor 6: Concejo Comunal de Organizaciones de la Sociedad Civil (COSOC)	3	7
Linares	Factor 6: Concejo Comunal de Organizaciones de la Sociedad Civil (COSOC)	0	7
Litueche	Factor 6: Concejo Comunal de Organizaciones de la Sociedad Civil (COSOC)	6	7
Llaillay	Factor 6: Concejo Comunal de Organizaciones de la Sociedad Civil (COSOC)	3	7
Llanquihue	Factor 6: Concejo Comunal de Organizaciones de la Sociedad Civil (COSOC)	1	7
Lo Barnechea	Factor 6: Concejo Comunal de Organizaciones de la Sociedad Civil (COSOC)	6	7
Lo Espejo	Factor 6: Concejo Comunal de Organizaciones de la Sociedad Civil (COSOC)	0	7
Lo Prado	Factor 6: Concejo Comunal de Organizaciones de la Sociedad Civil (COSOC)	6	7
Lolol	Factor 6: Concejo Comunal de Organizaciones de la Sociedad Civil (COSOC)	0	7
Loncoche	Factor 6: Concejo Comunal de Organizaciones de la Sociedad Civil (COSOC)	4	7
Longaví	Factor 6: Concejo Comunal de Organizaciones de la Sociedad Civil (COSOC)	0	7
Lonquimay	Factor 6: Concejo Comunal de Organizaciones de la Sociedad Civil (COSOC)	4	7
Los Álamos	Factor 6: Concejo Comunal de Organizaciones de la Sociedad Civil (COSOC)	3	7
Los Andes	Factor 6: Concejo Comunal de Organizaciones de la Sociedad Civil (COSOC)	3	7
Los Ángeles	Factor 6: Concejo Comunal de Organizaciones de la Sociedad Civil (COSOC)	6	7
Los Lagos	Factor 6: Concejo Comunal de Organizaciones de la Sociedad Civil (COSOC)	0	7
Los Muermos	Factor 6: Concejo Comunal de Organizaciones de la Sociedad Civil (COSOC)	1	7
Los Sauces	Factor 6: Concejo Comunal de Organizaciones de la Sociedad Civil (COSOC)	3	7
Los Vilos	Factor 6: Concejo Comunal de Organizaciones de la Sociedad Civil (COSOC)	0	7
Lota	Factor 6: Concejo Comunal de Organizaciones de la Sociedad Civil (COSOC)	0	7
Lumaco	Factor 6: Concejo Comunal de Organizaciones de la Sociedad Civil (COSOC)	5	7
Machalí	Factor 6: Concejo Comunal de Organizaciones de la Sociedad Civil (COSOC)	6	7
Macul	Factor 6: Concejo Comunal de Organizaciones de la Sociedad Civil (COSOC)	6	7
Máfil	Factor 6: Concejo Comunal de Organizaciones de la Sociedad Civil (COSOC)	0	7
Maipú	Factor 6: Concejo Comunal de Organizaciones de la Sociedad Civil (COSOC)	1	7
Malloa	Factor 6: Concejo Comunal de Organizaciones de la Sociedad Civil (COSOC)	1	7
Marchihue	Factor 6: Concejo Comunal de Organizaciones de la Sociedad Civil (COSOC)	1	7
María Elena	Factor 6: Concejo Comunal de Organizaciones de la Sociedad Civil (COSOC)	0	7
María Pinto	Factor 6: Concejo Comunal de Organizaciones de la Sociedad Civil (COSOC)	6	7
Mariquina	Factor 6: Concejo Comunal de Organizaciones de la Sociedad Civil (COSOC)	0	7
Maule	Factor 6: Concejo Comunal de Organizaciones de la Sociedad Civil (COSOC)	0	7
Maullín	Factor 6: Concejo Comunal de Organizaciones de la Sociedad Civil (COSOC)	0	7
Mejillones	Factor 6: Concejo Comunal de Organizaciones de la Sociedad Civil (COSOC)	1	7
Melipeuco	Factor 6: Concejo Comunal de Organizaciones de la Sociedad Civil (COSOC)	3	7
Melipilla	Factor 6: Concejo Comunal de Organizaciones de la Sociedad Civil (COSOC)	1	7
Molina	Factor 6: Concejo Comunal de Organizaciones de la Sociedad Civil (COSOC)	1	7
Monte Patria	Factor 6: Concejo Comunal de Organizaciones de la Sociedad Civil (COSOC)	0	7
Mostazal	Factor 6: Concejo Comunal de Organizaciones de la Sociedad Civil (COSOC)	0	7
Mulchén	Factor 6: Concejo Comunal de Organizaciones de la Sociedad Civil (COSOC)	1	7
Nacimiento	Factor 6: Concejo Comunal de Organizaciones de la Sociedad Civil (COSOC)	1	7
Nancagua	Factor 6: Concejo Comunal de Organizaciones de la Sociedad Civil (COSOC)	0	7
Natales	Factor 6: Concejo Comunal de Organizaciones de la Sociedad Civil (COSOC)	0	7
Navidad	Factor 6: Concejo Comunal de Organizaciones de la Sociedad Civil (COSOC)	1	7
Negrete	Factor 6: Concejo Comunal de Organizaciones de la Sociedad Civil (COSOC)	0	7
Ninhue	Factor 6: Concejo Comunal de Organizaciones de la Sociedad Civil (COSOC)	0	7
Nogales	Factor 6: Concejo Comunal de Organizaciones de la Sociedad Civil (COSOC)	3	7
Nueva Imperial	Factor 6: Concejo Comunal de Organizaciones de la Sociedad Civil (COSOC)	3	7
Ñiquén	Factor 6: Concejo Comunal de Organizaciones de la Sociedad Civil (COSOC)	5	7
Ñuñoa	Factor 6: Concejo Comunal de Organizaciones de la Sociedad Civil (COSOC)	1	7
O'Higgins	Factor 6: Concejo Comunal de Organizaciones de la Sociedad Civil (COSOC)	3	7
Olivar	Factor 6: Concejo Comunal de Organizaciones de la Sociedad Civil (COSOC)	1	7
Ollagüe	Factor 6: Concejo Comunal de Organizaciones de la Sociedad Civil (COSOC)	0	7
Olmué	Factor 6: Concejo Comunal de Organizaciones de la Sociedad Civil (COSOC)	1	7
Osorno	Factor 6: Concejo Comunal de Organizaciones de la Sociedad Civil (COSOC)	6	7
Ovalle	Factor 6: Concejo Comunal de Organizaciones de la Sociedad Civil (COSOC)	1	7
Padre Hurtado	Factor 6: Concejo Comunal de Organizaciones de la Sociedad Civil (COSOC)	2	7
Padre Las Casas	Factor 6: Concejo Comunal de Organizaciones de la Sociedad Civil (COSOC)	4	7
Paiguano	Factor 6: Concejo Comunal de Organizaciones de la Sociedad Civil (COSOC)	0	7
Paillaco	Factor 6: Concejo Comunal de Organizaciones de la Sociedad Civil (COSOC)	1	7
Paine	Factor 6: Concejo Comunal de Organizaciones de la Sociedad Civil (COSOC)	6	7
Palena	Factor 6: Concejo Comunal de Organizaciones de la Sociedad Civil (COSOC)	1	7
Palmilla	Factor 6: Concejo Comunal de Organizaciones de la Sociedad Civil (COSOC)	0	7
Panguipulli	Factor 6: Concejo Comunal de Organizaciones de la Sociedad Civil (COSOC)	0	7
Panquehue	Factor 6: Concejo Comunal de Organizaciones de la Sociedad Civil (COSOC)	4	7
Papudo	Factor 6: Concejo Comunal de Organizaciones de la Sociedad Civil (COSOC)	2	7
Paredones	Factor 6: Concejo Comunal de Organizaciones de la Sociedad Civil (COSOC)	1	7
Parral	Factor 6: Concejo Comunal de Organizaciones de la Sociedad Civil (COSOC)	6	7
Pedro Aguirre Cerda	Factor 6: Concejo Comunal de Organizaciones de la Sociedad Civil (COSOC)	1	7
Pelarco	Factor 6: Concejo Comunal de Organizaciones de la Sociedad Civil (COSOC)	0	7
Pelluhue	Factor 6: Concejo Comunal de Organizaciones de la Sociedad Civil (COSOC)	0	7
Pemuco	Factor 6: Concejo Comunal de Organizaciones de la Sociedad Civil (COSOC)	0	7
Pencahue	Factor 6: Concejo Comunal de Organizaciones de la Sociedad Civil (COSOC)	0	7
Penco	Factor 6: Concejo Comunal de Organizaciones de la Sociedad Civil (COSOC)	1	7
Peñaflor	Factor 6: Concejo Comunal de Organizaciones de la Sociedad Civil (COSOC)	4	7
Peñalolén	Factor 6: Concejo Comunal de Organizaciones de la Sociedad Civil (COSOC)	1	7
Peralillo	Factor 6: Concejo Comunal de Organizaciones de la Sociedad Civil (COSOC)	0	7
Perquenco	Factor 6: Concejo Comunal de Organizaciones de la Sociedad Civil (COSOC)	3	7
Petorca	Factor 6: Concejo Comunal de Organizaciones de la Sociedad Civil (COSOC)	1	7
Peumo	Factor 6: Concejo Comunal de Organizaciones de la Sociedad Civil (COSOC)	1	7
Pica	Factor 6: Concejo Comunal de Organizaciones de la Sociedad Civil (COSOC)	0	7
Pichidegua	Factor 6: Concejo Comunal de Organizaciones de la Sociedad Civil (COSOC)	1	7
Pichilemu	Factor 6: Concejo Comunal de Organizaciones de la Sociedad Civil (COSOC)	0	7
Pinto	Factor 6: Concejo Comunal de Organizaciones de la Sociedad Civil (COSOC)	0	7
Pirque	Factor 6: Concejo Comunal de Organizaciones de la Sociedad Civil (COSOC)	1	7
Pitrufquén	Factor 6: Concejo Comunal de Organizaciones de la Sociedad Civil (COSOC)	4	7
Placilla	Factor 6: Concejo Comunal de Organizaciones de la Sociedad Civil (COSOC)	0	7
Portezuelo	Factor 6: Concejo Comunal de Organizaciones de la Sociedad Civil (COSOC)	0	7
Porvenir	Factor 6: Concejo Comunal de Organizaciones de la Sociedad Civil (COSOC)	0	7
Pozo Almonte	Factor 6: Concejo Comunal de Organizaciones de la Sociedad Civil (COSOC)	1	7
Primavera	Factor 6: Concejo Comunal de Organizaciones de la Sociedad Civil (COSOC)	0	7
Providencia	Factor 6: Concejo Comunal de Organizaciones de la Sociedad Civil (COSOC)	6	7
Puchuncaví	Factor 6: Concejo Comunal de Organizaciones de la Sociedad Civil (COSOC)	1	7
Pucón	Factor 6: Concejo Comunal de Organizaciones de la Sociedad Civil (COSOC)	5	7
Pudahuel	Factor 6: Concejo Comunal de Organizaciones de la Sociedad Civil (COSOC)	0	7
Puente Alto	Factor 6: Concejo Comunal de Organizaciones de la Sociedad Civil (COSOC)	0	7
Puerto Montt	Factor 6: Concejo Comunal de Organizaciones de la Sociedad Civil (COSOC)	1	7
Puerto Octay	Factor 6: Concejo Comunal de Organizaciones de la Sociedad Civil (COSOC)	0	7
Puerto Varas	Factor 6: Concejo Comunal de Organizaciones de la Sociedad Civil (COSOC)	6	7
Pumanque	Factor 6: Concejo Comunal de Organizaciones de la Sociedad Civil (COSOC)	0	7
Punitaqui	Factor 6: Concejo Comunal de Organizaciones de la Sociedad Civil (COSOC)	6	7
Punta Arenas	Factor 6: Concejo Comunal de Organizaciones de la Sociedad Civil (COSOC)	4	7
Puqueldón	Factor 6: Concejo Comunal de Organizaciones de la Sociedad Civil (COSOC)	1	7
Purén	Factor 6: Concejo Comunal de Organizaciones de la Sociedad Civil (COSOC)	5	7
Purranque	Factor 6: Concejo Comunal de Organizaciones de la Sociedad Civil (COSOC)	5	7
Putaendo	Factor 6: Concejo Comunal de Organizaciones de la Sociedad Civil (COSOC)	1	7
Putre	Factor 6: Concejo Comunal de Organizaciones de la Sociedad Civil (COSOC)	5	7
Puyehue	Factor 6: Concejo Comunal de Organizaciones de la Sociedad Civil (COSOC)	0	7
Queilén	Factor 6: Concejo Comunal de Organizaciones de la Sociedad Civil (COSOC)	1	7
Quellón	Factor 6: Concejo Comunal de Organizaciones de la Sociedad Civil (COSOC)	1	7
Quemchi	Factor 6: Concejo Comunal de Organizaciones de la Sociedad Civil (COSOC)	1	7
Quilaco	Factor 6: Concejo Comunal de Organizaciones de la Sociedad Civil (COSOC)	0	7
Quilicura	Factor 6: Concejo Comunal de Organizaciones de la Sociedad Civil (COSOC)	1	7
Quilleco	Factor 6: Concejo Comunal de Organizaciones de la Sociedad Civil (COSOC)	0	7
Quillón	Factor 6: Concejo Comunal de Organizaciones de la Sociedad Civil (COSOC)	0	7
Quillota	Factor 6: Concejo Comunal de Organizaciones de la Sociedad Civil (COSOC)	3	7
Quilpué	Factor 6: Concejo Comunal de Organizaciones de la Sociedad Civil (COSOC)	4	7
Quinchao	Factor 6: Concejo Comunal de Organizaciones de la Sociedad Civil (COSOC)	0	7
Quinta De Tilcoco	Factor 6: Concejo Comunal de Organizaciones de la Sociedad Civil (COSOC)	1	7
Quinta Normal	Factor 6: Concejo Comunal de Organizaciones de la Sociedad Civil (COSOC)	6	7
Quintero	Factor 6: Concejo Comunal de Organizaciones de la Sociedad Civil (COSOC)	3	7
Quirihue	Factor 6: Concejo Comunal de Organizaciones de la Sociedad Civil (COSOC)	0	7
Rancagua	Factor 6: Concejo Comunal de Organizaciones de la Sociedad Civil (COSOC)	1	7
Ránquil	Factor 6: Concejo Comunal de Organizaciones de la Sociedad Civil (COSOC)	6	7
Rauco	Factor 6: Concejo Comunal de Organizaciones de la Sociedad Civil (COSOC)	6	7
Recoleta	Factor 6: Concejo Comunal de Organizaciones de la Sociedad Civil (COSOC)	6	7
Renaico	Factor 6: Concejo Comunal de Organizaciones de la Sociedad Civil (COSOC)	4	7
Renca	Factor 6: Concejo Comunal de Organizaciones de la Sociedad Civil (COSOC)	1	7
Rengo	Factor 6: Concejo Comunal de Organizaciones de la Sociedad Civil (COSOC)	0	7
Requínoa	Factor 6: Concejo Comunal de Organizaciones de la Sociedad Civil (COSOC)	1	7
Retiro	Factor 6: Concejo Comunal de Organizaciones de la Sociedad Civil (COSOC)	1	7
Rinconada	Factor 6: Concejo Comunal de Organizaciones de la Sociedad Civil (COSOC)	5	7
Río Bueno	Factor 6: Concejo Comunal de Organizaciones de la Sociedad Civil (COSOC)	1	7
Río Claro	Factor 6: Concejo Comunal de Organizaciones de la Sociedad Civil (COSOC)	1	7
Río Hurtado	Factor 6: Concejo Comunal de Organizaciones de la Sociedad Civil (COSOC)	1	7
Río Ibáñez	Factor 6: Concejo Comunal de Organizaciones de la Sociedad Civil (COSOC)	3	7
Río Negro	Factor 6: Concejo Comunal de Organizaciones de la Sociedad Civil (COSOC)	1	7
Río Verde	Factor 6: Concejo Comunal de Organizaciones de la Sociedad Civil (COSOC)	2	7
Romeral	Factor 6: Concejo Comunal de Organizaciones de la Sociedad Civil (COSOC)	2	7
Saavedra	Factor 6: Concejo Comunal de Organizaciones de la Sociedad Civil (COSOC)	3	7
Sagrada Familia	Factor 6: Concejo Comunal de Organizaciones de la Sociedad Civil (COSOC)	0	7
Salamanca	Factor 6: Concejo Comunal de Organizaciones de la Sociedad Civil (COSOC)	6	7
San Antonio	Factor 6: Concejo Comunal de Organizaciones de la Sociedad Civil (COSOC)	4	7
[truncated: 3,505 more rows]

## Sheet: 2. Puntajes CF Traspuestos
Comuna	Dimensión	Puntaje CF
Isla de Maipo	Factor 1: Información de unidades municipales y funcionarios	4.65019	2
Algarrobo	Factor 1: Información de unidades municipales y funcionarios	8.25417	2
Alhué	Factor 1: Información de unidades municipales y funcionarios	8.78631	2
Alto Biobío	Factor 1: Información de unidades municipales y funcionarios	0.532139	2
Alto Del Carmen	Factor 1: Información de unidades municipales y funcionarios	8.78631	2
Alto Hospicio	Factor 1: Información de unidades municipales y funcionarios	0	2
Ancud	Factor 1: Información de unidades municipales y funcionarios	8.78631	2
Andacollo	Factor 1: Información de unidades municipales y funcionarios	0.532139	2
Angol	Factor 1: Información de unidades municipales y funcionarios	7.23576	2
Antofagasta	Factor 1: Información de unidades municipales y funcionarios	9.278	2
Antuco	Factor 1: Información de unidades municipales y funcionarios	8.78631	2
Arauco	Factor 1: Información de unidades municipales y funcionarios	8.78631	2
Arica	Factor 1: Información de unidades municipales y funcionarios	8.48963	2
Aysén	Factor 1: Información de unidades municipales y funcionarios	8.78631	2
Buin	Factor 1: Información de unidades municipales y funcionarios	8.78631	2
Bulnes	Factor 1: Información de unidades municipales y funcionarios	8.02413	2
Cabildo	Factor 1: Información de unidades municipales y funcionarios	7.23024	2
Cabo De Hornos	Factor 1: Información de unidades municipales y funcionarios	7.24909	2
Cabrero	Factor 1: Información de unidades municipales y funcionarios	8.78631	2
Calama	Factor 1: Información de unidades municipales y funcionarios	1.29432	2
Calbuco	Factor 1: Información de unidades municipales y funcionarios	8.78631	2
Caldera	Factor 1: Información de unidades municipales y funcionarios	0.532139	2
Calera	Factor 1: Información de unidades municipales y funcionarios	6.25583	2
Calera De Tango	Factor 1: Información de unidades municipales y funcionarios	0	2
Calle Larga	Factor 1: Información de unidades municipales y funcionarios	1.65766	2
Camarones	Factor 1: Información de unidades municipales y funcionarios	1.41883	2
Camiña	Factor 1: Información de unidades municipales y funcionarios	6.48691	2
Canela	Factor 1: Información de unidades municipales y funcionarios	2.9277	2
Cañete	Factor 1: Información de unidades municipales y funcionarios	8.78631	2
Carahue	Factor 1: Información de unidades municipales y funcionarios	6.39918	2
Cartagena	Factor 1: Información de unidades municipales y funcionarios	8.78631	2
Casablanca	Factor 1: Información de unidades municipales y funcionarios	8.78631	2
Castro	Factor 1: Información de unidades municipales y funcionarios	8.78631	2
Catemu	Factor 1: Información de unidades municipales y funcionarios	9.278	2
Cauquenes	Factor 1: Información de unidades municipales y funcionarios	0.532139	2
Cerrillos	Factor 1: Información de unidades municipales y funcionarios	9.278	2
Cerro Navia	Factor 1: Información de unidades municipales y funcionarios	8.78631	2
Chaitén	Factor 1: Información de unidades municipales y funcionarios	0.532139	2
Chanco	Factor 1: Información de unidades municipales y funcionarios	8.78631	2
Chañaral	Factor 1: Información de unidades municipales y funcionarios	8.78631	2
Chépica	Factor 1: Información de unidades municipales y funcionarios	8.02221	2
Chiguayante	Factor 1: Información de unidades municipales y funcionarios	8.78631	2
Chile Chico	Factor 1: Información de unidades municipales y funcionarios	0.532139	2
Chillán	Factor 1: Información de unidades municipales y funcionarios	8.78631	2
Chillán Viejo	Factor 1: Información de unidades municipales y funcionarios	0.532139	2
Chimbarongo	Factor 1: Información de unidades municipales y funcionarios	8.78631	2
Cholchol	Factor 1: Información de unidades municipales y funcionarios	6.36647	2
Chonchi	Factor 1: Información de unidades municipales y funcionarios	8.78631	2
Cisnes	Factor 1: Información de unidades municipales y funcionarios	1.32051	2
Cobquecura	Factor 1: Información de unidades municipales y funcionarios	0.532139	2
Cochamó	Factor 1: Información de unidades municipales y funcionarios	8.78631	2
Cochrane	Factor 1: Información de unidades municipales y funcionarios	5.61624	2
Codegua	Factor 1: Información de unidades municipales y funcionarios	8.78631	2
Coelemu	Factor 1: Información de unidades municipales y funcionarios	0.532139	2
Coihueco	Factor 1: Información de unidades municipales y funcionarios	0.532139	2
Coinco	Factor 1: Información de unidades municipales y funcionarios	8.78631	2
Colbún	Factor 1: Información de unidades municipales y funcionarios	9.278	2
Colchane	Factor 1: Información de unidades municipales y funcionarios	8.78631	2
Colina	Factor 1: Información de unidades municipales y funcionarios	8.78631	2
Collipulli	Factor 1: Información de unidades municipales y funcionarios	8.78631	2
Coltauco	Factor 1: Información de unidades municipales y funcionarios	8.78631	2
Combarbalá	Factor 1: Información de unidades municipales y funcionarios	0.532139	2
Concepción	Factor 1: Información de unidades municipales y funcionarios	8.78631	2
Conchalí	Factor 1: Información de unidades municipales y funcionarios	8.02413	2
Concón	Factor 1: Información de unidades municipales y funcionarios	6.64208	2
Constitución	Factor 1: Información de unidades municipales y funcionarios	0	2
Contulmo	Factor 1: Información de unidades municipales y funcionarios	5.51941	2
Copiapó	Factor 1: Información de unidades municipales y funcionarios	0	2
Coquimbo	Factor 1: Información de unidades municipales y funcionarios	8.78631	2
Coronel	Factor 1: Información de unidades municipales y funcionarios	8.78631	2
Corral	Factor 1: Información de unidades municipales y funcionarios	4.85148	2
Coyhaique	Factor 1: Información de unidades municipales y funcionarios	9.278	2
Cunco	Factor 1: Información de unidades municipales y funcionarios	9.278	2
Curacautín	Factor 1: Información de unidades municipales y funcionarios	8.78631	2
Curacaví	Factor 1: Información de unidades municipales y funcionarios	8.78631	2
Curaco De Vélez	Factor 1: Información de unidades municipales y funcionarios	4.18814	2
Curanilahue	Factor 1: Información de unidades municipales y funcionarios	8.78631	2
Curarrehue	Factor 1: Información de unidades municipales y funcionarios	6.9786	2
Curepto	Factor 1: Información de unidades municipales y funcionarios	8.78631	2
Curicó	Factor 1: Información de unidades municipales y funcionarios	8.78631	2
Dalcahue	Factor 1: Información de unidades municipales y funcionarios	8.78631	2
Diego De Almagro	Factor 1: Información de unidades municipales y funcionarios	8.78631	2
Doñihue	Factor 1: Información de unidades municipales y funcionarios	8.78631	2
El Bosque	Factor 1: Información de unidades municipales y funcionarios	9.278	2
El Carmen	Factor 1: Información de unidades municipales y funcionarios	0.532139	2
El Monte	Factor 1: Información de unidades municipales y funcionarios	8.78631	2
El Quisco	Factor 1: Información de unidades municipales y funcionarios	8.78631	2
El Tabo	Factor 1: Información de unidades municipales y funcionarios	7.99794	2
Empedrado	Factor 1: Información de unidades municipales y funcionarios	8.78631	2
Ercilla	Factor 1: Información de unidades municipales y funcionarios	5.60022	2
Estación Central	Factor 1: Información de unidades municipales y funcionarios	9.278	2
Florida	Factor 1: Información de unidades municipales y funcionarios	8.78631	2
Freire	Factor 1: Información de unidades municipales y funcionarios	6.38678	2
Freirina	Factor 1: Información de unidades municipales y funcionarios	0	2
Fresia	Factor 1: Información de unidades municipales y funcionarios	8.78631	2
Frutillar	Factor 1: Información de unidades municipales y funcionarios	8.78631	2
Futaleufú	Factor 1: Información de unidades municipales y funcionarios	8.78631	2
Futrono	Factor 1: Información de unidades municipales y funcionarios	8.02221	2
Galvarino	Factor 1: Información de unidades municipales y funcionarios	6.25558	2
General Lagos	Factor 1: Información de unidades municipales y funcionarios	0.532139	2
Gorbea	Factor 1: Información de unidades municipales y funcionarios	6.34164	2
Graneros	Factor 1: Información de unidades municipales y funcionarios	8.78631	2
Guaitecas	Factor 1: Información de unidades municipales y funcionarios	7.14389	2
Hijuelas	Factor 1: Información de unidades municipales y funcionarios	8.51582	2
Hualaihué	Factor 1: Información de unidades municipales y funcionarios	8.01318	2
Hualañé	Factor 1: Información de unidades municipales y funcionarios	8.78631	2
Hualpén	Factor 1: Información de unidades municipales y funcionarios	8.25417	2
Hualqui	Factor 1: Información de unidades municipales y funcionarios	8.78631	2
Huara	Factor 1: Información de unidades municipales y funcionarios	0.532139	2
Huasco	Factor 1: Información de unidades municipales y funcionarios	0.532139	2
Huechuraba	Factor 1: Información de unidades municipales y funcionarios	8.78631	2
Illapel	Factor 1: Información de unidades municipales y funcionarios	0.532139	2
Independencia	Factor 1: Información de unidades municipales y funcionarios	8.78631	2
Iquique	Factor 1: Información de unidades municipales y funcionarios	8.78631	2
Juan Fernández	Factor 1: Información de unidades municipales y funcionarios	6.18472	2
La Cisterna	Factor 1: Información de unidades municipales y funcionarios	8.78631	2
La Cruz	Factor 1: Información de unidades municipales y funcionarios	6.28562	2
La Estrella	Factor 1: Información de unidades municipales y funcionarios	8.78631	2
La Florida	Factor 1: Información de unidades municipales y funcionarios	8.78631	2
La Granja	Factor 1: Información de unidades municipales y funcionarios	8.78631	2
La Higuera	Factor 1: Información de unidades municipales y funcionarios	0	2
La Ligua	Factor 1: Información de unidades municipales y funcionarios	8.78631	2
La Pintana	Factor 1: Información de unidades municipales y funcionarios	9.278	2
La Reina	Factor 1: Información de unidades municipales y funcionarios	8.78631	2
La Serena	Factor 1: Información de unidades municipales y funcionarios	8.25417	2
La Unión	Factor 1: Información de unidades municipales y funcionarios	8.78631	2
Lago Ranco	Factor 1: Información de unidades municipales y funcionarios	8.78631	2
Lago Verde	Factor 1: Información de unidades municipales y funcionarios	7.74079	2
Laguna Blanca	Factor 1: Información de unidades municipales y funcionarios	5.61762	2
Laja	Factor 1: Información de unidades municipales y funcionarios	8.25417	2
Lampa	Factor 1: Información de unidades municipales y funcionarios	0.532139	2
Lanco	Factor 1: Información de unidades municipales y funcionarios	0.532139	2
Las Cabras	Factor 1: Información de unidades municipales y funcionarios	8.78631	2
Las Condes	Factor 1: Información de unidades municipales y funcionarios	8.78631	2
Lautaro	Factor 1: Información de unidades municipales y funcionarios	8.78631	2
Lebu	Factor 1: Información de unidades municipales y funcionarios	8.78631	2
Licantén	Factor 1: Información de unidades municipales y funcionarios	8.78631	2
Limache	Factor 1: Información de unidades municipales y funcionarios	7.12313	2
Linares	Factor 1: Información de unidades municipales y funcionarios	8.78631	2
Litueche	Factor 1: Información de unidades municipales y funcionarios	8.78631	2
Llaillay	Factor 1: Información de unidades municipales y funcionarios	2.08269	2
Llanquihue	Factor 1: Información de unidades municipales y funcionarios	8.78631	2
Lo Barnechea	Factor 1: Información de unidades municipales y funcionarios	9.278	2
Lo Espejo	Factor 1: Información de unidades municipales y funcionarios	8.78631	2
Lo Prado	Factor 1: Información de unidades municipales y funcionarios	8.78631	2
Lolol	Factor 1: Información de unidades municipales y funcionarios	8.78631	2
Loncoche	Factor 1: Información de unidades municipales y funcionarios	8.02221	2
Longaví	Factor 1: Información de unidades municipales y funcionarios	0	2
Lonquimay	Factor 1: Información de unidades municipales y funcionarios	7.98368	2
Los Álamos	Factor 1: Información de unidades municipales y funcionarios	8.78631	2
Los Andes	Factor 1: Información de unidades municipales y funcionarios	8.78631	2
Los Ángeles	Factor 1: Información de unidades municipales y funcionarios	8.78631	2
Los Lagos	Factor 1: Información de unidades municipales y funcionarios	8.78631	2
Los Muermos	Factor 1: Información de unidades municipales y funcionarios	8.78631	2
Los Sauces	Factor 1: Información de unidades municipales y funcionarios	7.75173	2
Los Vilos	Factor 1: Información de unidades municipales y funcionarios	0	2
Lota	Factor 1: Información de unidades municipales y funcionarios	8.78631	2
Lumaco	Factor 1: Información de unidades municipales y funcionarios	7.24909	2
Machalí	Factor 1: Información de unidades municipales y funcionarios	8.78631	2
Macul	Factor 1: Información de unidades municipales y funcionarios	8.78631	2
Máfil	Factor 1: Información de unidades municipales y funcionarios	0.532139	2
Maipú	Factor 1: Información de unidades municipales y funcionarios	8.78631	2
Malloa	Factor 1: Información de unidades municipales y funcionarios	8.78631	2
Marchihue	Factor 1: Información de unidades municipales y funcionarios	8.78631	2
María Elena	Factor 1: Información de unidades municipales y funcionarios	0.532139	2
María Pinto	Factor 1: Información de unidades municipales y funcionarios	0.532139	2
Mariquina	Factor 1: Información de unidades municipales y funcionarios	9.278	2
Maule	Factor 1: Información de unidades municipales y funcionarios	8.78631	2
Maullín	Factor 1: Información de unidades municipales y funcionarios	8.78631	2
Mejillones	Factor 1: Información de unidades municipales y funcionarios	8.78631	2
Melipeuco	Factor 1: Información de unidades municipales y funcionarios	3.79352	2
Melipilla	Factor 1: Información de unidades municipales y funcionarios	8.78631	2
Molina	Factor 1: Información de unidades municipales y funcionarios	8.78631	2
Monte Patria	Factor 1: Información de unidades municipales y funcionarios	0.532139	2
Mostazal	Factor 1: Información de unidades municipales y funcionarios	8.78631	2
Mulchén	Factor 1: Información de unidades municipales y funcionarios	8.78631	2
Nacimiento	Factor 1: Información de unidades municipales y funcionarios	8.78631	2
Nancagua	Factor 1: Información de unidades municipales y funcionarios	8.02413	2
Natales	Factor 1: Información de unidades municipales y funcionarios	8.78631	2
Navidad	Factor 1: Información de unidades municipales y funcionarios	8.78631	2
Negrete	Factor 1: Información de unidades municipales y funcionarios	8.78631	2
Ninhue	Factor 1: Información de unidades municipales y funcionarios	0	2
Nogales	Factor 1: Información de unidades municipales y funcionarios	3.86026	2
Nueva Imperial	Factor 1: Información de unidades municipales y funcionarios	7.26003	2
Ñiquén	Factor 1: Información de unidades municipales y funcionarios	0.532139	2
Ñuñoa	Factor 1: Información de unidades municipales y funcionarios	8.78631	2
O'Higgins	Factor 1: Información de unidades municipales y funcionarios	5.61762	2
Olivar	Factor 1: Información de unidades municipales y funcionarios	8.78631	2
Ollagüe	Factor 1: Información de unidades municipales y funcionarios	0.532139	2
Olmué	Factor 1: Información de unidades municipales y funcionarios	7.23024	2
Osorno	Factor 1: Información de unidades municipales y funcionarios	9.278	2
Ovalle	Factor 1: Información de unidades municipales y funcionarios	8.78631	2
Padre Hurtado	Factor 1: Información de unidades municipales y funcionarios	7.99794	2
Padre Las Casas	Factor 1: Información de unidades municipales y funcionarios	8.78631	2
Paiguano	Factor 1: Información de unidades municipales y funcionarios	0	2
Paillaco	Factor 1: Información de unidades municipales y funcionarios	8.78631	2
Paine	Factor 1: Información de unidades municipales y funcionarios	8.78631	2
Palena	Factor 1: Información de unidades municipales y funcionarios	8.78631	2
Palmilla	Factor 1: Información de unidades municipales y funcionarios	8.78631	2
Panguipulli	Factor 1: Información de unidades municipales y funcionarios	8.25417	2
Panquehue	Factor 1: Información de unidades municipales y funcionarios	7.26003	2
Papudo	Factor 1: Información de unidades municipales y funcionarios	6.40109	2
Paredones	Factor 1: Información de unidades municipales y funcionarios	8.78631	2
Parral	Factor 1: Información de unidades municipales y funcionarios	0.532139	2
Pedro Aguirre Cerda	Factor 1: Información de unidades municipales y funcionarios	8.78631	2
Pelarco	Factor 1: Información de unidades municipales y funcionarios	8.78631	2
Pelluhue	Factor 1: Información de unidades municipales y funcionarios	8.78631	2
Pemuco	Factor 1: Información de unidades municipales y funcionarios	0.532139	2
Pencahue	Factor 1: Información de unidades municipales y funcionarios	8.78631	2
Penco	Factor 1: Información de unidades municipales y funcionarios	8.78631	2
Peñaflor	Factor 1: Información de unidades municipales y funcionarios	9.278	2
Peñalolén	Factor 1: Información de unidades municipales y funcionarios	8.78631	2
Peralillo	Factor 1: Información de unidades municipales y funcionarios	8.78631	2
Perquenco	Factor 1: Información de unidades municipales y funcionarios	6.36431	2
Petorca	Factor 1: Información de unidades municipales y funcionarios	1.32051	2
Peumo	Factor 1: Información de unidades municipales y funcionarios	8.78631	2
Pica	Factor 1: Información de unidades municipales y funcionarios	8.78631	2
Pichidegua	Factor 1: Información de unidades municipales y funcionarios	8.78631	2
Pichilemu	Factor 1: Información de unidades municipales y funcionarios	8.78631	2
Pinto	Factor 1: Información de unidades municipales y funcionarios	9.278	2
Pirque	Factor 1: Información de unidades municipales y funcionarios	0.532139	2
Pitrufquén	Factor 1: Información de unidades municipales y funcionarios	7.23385	2
Placilla	Factor 1: Información de unidades municipales y funcionarios	8.78631	2
Portezuelo	Factor 1: Información de unidades municipales y funcionarios	8.78631	2
Porvenir	Factor 1: Información de unidades municipales y funcionarios	9.278	2
Pozo Almonte	Factor 1: Información de unidades municipales y funcionarios	0	2
Primavera	Factor 1: Información de unidades municipales y funcionarios	0.532139	2
Providencia	Factor 1: Información de unidades municipales y funcionarios	9.278	2
Puchuncaví	Factor 1: Información de unidades municipales y funcionarios	8.02221	2
Pucón	Factor 1: Información de unidades municipales y funcionarios	8.78631	2
Pudahuel	Factor 1: Información de unidades municipales y funcionarios	8.78631	2
Puente Alto	Factor 1: Información de unidades municipales y funcionarios	8.78631	2
Puerto Montt	Factor 1: Información de unidades municipales y funcionarios	8.78631	2
Puerto Octay	Factor 1: Información de unidades municipales y funcionarios	0.532139	2
Puerto Varas	Factor 1: Información de unidades municipales y funcionarios	9.278	2
Pumanque	Factor 1: Información de unidades municipales y funcionarios	5.6246	2
Punitaqui	Factor 1: Información de unidades municipales y funcionarios	0.532139	2
Punta Arenas	Factor 1: Información de unidades municipales y funcionarios	8.78631	2
Puqueldón	Factor 1: Información de unidades municipales y funcionarios	8.78631	2
Purén	Factor 1: Información de unidades municipales y funcionarios	7.22833	2
Purranque	Factor 1: Información de unidades municipales y funcionarios	8.78631	2
Putaendo	Factor 1: Información de unidades municipales y funcionarios	7.17422	2
Putre	Factor 1: Información de unidades municipales y funcionarios	3.87019	2
Puyehue	Factor 1: Información de unidades municipales y funcionarios	8.78631	2
Queilén	Factor 1: Información de unidades municipales y funcionarios	8.78631	2
Quellón	Factor 1: Información de unidades municipales y funcionarios	8.78631	2
Quemchi	Factor 1: Información de unidades municipales y funcionarios	8.78631	2
Quilaco	Factor 1: Información de unidades municipales y funcionarios	8.78631	2
Quilicura	Factor 1: Información de unidades municipales y funcionarios	8.78631	2
Quilleco	Factor 1: Información de unidades municipales y funcionarios	0	2
Quillón	Factor 1: Información de unidades municipales y funcionarios	0.532139	2
Quillota	Factor 1: Información de unidades municipales y funcionarios	9.278	2
Quilpué	Factor 1: Información de unidades municipales y funcionarios	9.278	2
Quinchao	Factor 1: Información de unidades municipales y funcionarios	4.79546	2
Quinta De Tilcoco	Factor 1: Información de unidades municipales y funcionarios	8.78631	2
Quinta Normal	Factor 1: Información de unidades municipales y funcionarios	8.78631	2
Quintero	Factor 1: Información de unidades municipales y funcionarios	8.42809	2
Quirihue	Factor 1: Información de unidades municipales y funcionarios	0.532139	2
Rancagua	Factor 1: Información de unidades municipales y funcionarios	8.78631	2
Ránquil	Factor 1: Información de unidades municipales y funcionarios	7.10573	2
Rauco	Factor 1: Información de unidades municipales y funcionarios	8.78631	2
Recoleta	Factor 1: Información de unidades municipales y funcionarios	8.78631	2
Renaico	Factor 1: Información de unidades municipales y funcionarios	7.26003	2
Renca	Factor 1: Información de unidades municipales y funcionarios	8.78631	2
Rengo	Factor 1: Información de unidades municipales y funcionarios	9.278	2
Requínoa	Factor 1: Información de unidades municipales y funcionarios	0.532139	2
Retiro	Factor 1: Información de unidades municipales y funcionarios	8.78631	2
Rinconada	Factor 1: Información de unidades municipales y funcionarios	7.23024	2
Río Bueno	Factor 1: Información de unidades municipales y funcionarios	8.78631	2
Río Claro	Factor 1: Información de unidades municipales y funcionarios	8.78631	2
Río Hurtado	Factor 1: Información de unidades municipales y funcionarios	0.532139	2
Río Ibáñez	Factor 1: Información de unidades municipales y funcionarios	1.32051	2
Río Negro	Factor 1: Información de unidades municipales y funcionarios	8.78631	2
Río Verde	Factor 1: Información de unidades municipales y funcionarios	5.08548	2
Romeral	Factor 1: Información de unidades municipales y funcionarios	0	2
Saavedra	Factor 1: Información de unidades municipales y funcionarios	8.50488	2
Sagrada Familia	Factor 1: Información de unidades municipales y funcionarios	8.78631	2
Salamanca	Factor 1: Información de unidades municipales y funcionarios	8.78631	2
San Antonio	Factor 1: Información de unidades municipales y funcionarios	9.278	2
San Bernardo	Factor 1: Información de unidades municipales y funcionarios	8.78631	2
San Carlos	Factor 1: Información de unidades municipales y funcionarios	8.78631	2
San Clemente	Factor 1: Información de unidades municipales y funcionarios	8.78631	2
San Esteban	Factor 1: Información de unidades municipales y funcionarios	7.26003	2
San Fabián	Factor 1: Información de unidades municipales y funcionarios	0.532139	2
San Felipe	Factor 1: Información de unidades municipales y funcionarios	8.78631	2
San Fernando	Factor 1: Información de unidades municipales y funcionarios	8.78631	2
San Gregorio	Factor 1: Información de unidades municipales y funcionarios	1.32051	2
San Ignacio	Factor 1: Información de unidades municipales y funcionarios	0.532139	2
San Javier	Factor 1: Información de unidades municipales y funcionarios	8.78631	2
San Joaquín	Factor 1: Información de unidades municipales y funcionarios	8.78631	2
San José De Maipo	Factor 1: Información de unidades municipales y funcionarios	8.78631	2
San Juan De La Costa	Factor 1: Información de unidades municipales y funcionarios	9.278	2
San Miguel	Factor 1: Información de unidades municipales y funcionarios	0.532139	2
San Nicolás	Factor 1: Información de unidades municipales y funcionarios	0.532139	2
San Pablo	Factor 1: Información de unidades municipales y funcionarios	8.02221	2
San Pedro	Factor 1: Información de unidades municipales y funcionarios	8.78631	2
San Pedro De Atacama	Factor 1: Información de unidades municipales y funcionarios	8.78631	2
San Pedro De La Paz	Factor 1: Información de unidades municipales y funcionarios	8.78631	2
San Rafael	Factor 1: Información de unidades municipales y funcionarios	8.78631	2
San Ramón	Factor 1: Información de unidades municipales y funcionarios	8.78631	2
San Rosendo	Factor 1: Información de unidades municipales y funcionarios	0.532139	2
San Vicente	Factor 1: Información de unidades municipales y funcionarios	9.278	2
Santa Bárbara	Factor 1: Información de unidades municipales y funcionarios	9.278	2
Santa Cruz	Factor 1: Información de unidades municipales y funcionarios	0	2
Santa Juana	Factor 1: Información de unidades municipales y funcionarios	8.78631	2
Santa María	Factor 1: Información de unidades municipales y funcionarios	5.59686	2
Santiago	Factor 1: Información de unidades municipales y funcionarios	8.78631	2
Santo Domingo	Factor 1: Información de unidades municipales y funcionarios	8.78631	2
Sierra Gorda	Factor 1: Información de unidades municipales y funcionarios	8.78631	2
Talagante	Factor 1: Información de unidades municipales y funcionarios	8.78631	2
Talca	Factor 1: Información de unidades municipales y funcionarios	3.70479	2
Talcahuano	Factor 1: Información de unidades municipales y funcionarios	8.78631	2
Taltal	Factor 1: Información de unidades municipales y funcionarios	0.532139	2
Temuco	Factor 1: Información de unidades municipales y funcionarios	9.278	2
Teno	Factor 1: Información de unidades municipales y funcionarios	8.78631	2
Teodoro Schmidt	Factor 1: Información de unidades municipales y funcionarios	8.48963	2
Tierra Amarilla	Factor 1: Información de unidades municipales y funcionarios	0.532139	2
Tiltil	Factor 1: Información de unidades municipales y funcionarios	8.78631	2
Timaukel	Factor 1: Información de unidades municipales y funcionarios	0.532139	2
Tirúa	Factor 1: Información de unidades municipales y funcionarios	8.51582	2
Tocopilla	Factor 1: Información de unidades municipales y funcionarios	0.532139	2
Toltén	Factor 1: Información de unidades municipales y funcionarios	0.788368	2
Tomé	Factor 1: Información de unidades municipales y funcionarios	8.78631	2
Torres Del Paine	Factor 1: Información de unidades municipales y funcionarios	8.02221	2
Tortel	Factor 1: Información de unidades municipales y funcionarios	6.9786	2
Traiguén	Factor 1: Información de unidades municipales y funcionarios	7.24909	2
Treguaco	Factor 1: Información de unidades municipales y funcionarios	0.532139	2
Tucapel	Factor 1: Información de unidades municipales y funcionarios	0.532139	2
Valdivia	Factor 1: Información de unidades municipales y funcionarios	8.78631	2
Vallenar	Factor 1: Información de unidades municipales y funcionarios	0	2
Valparaíso	Factor 1: Información de unidades municipales y funcionarios	5.23798	2
Vichuquén	Factor 1: Información de unidades municipales y funcionarios	8.78631	2
Victoria	Factor 1: Información de unidades municipales y funcionarios	7.251	2
Vicuña	Factor 1: Información de unidades municipales y funcionarios	0.532139	2
Vilcún	Factor 1: Información de unidades municipales y funcionarios	7.13553	2
Villa Alegre	Factor 1: Información de unidades municipales y funcionarios	8.78631	2
Villa Alemana	Factor 1: Información de unidades municipales y funcionarios	8.51391	2
Villarrica	Factor 1: Información de unidades municipales y funcionarios	9.278	2
Viña Del Mar	Factor 1: Información de unidades municipales y funcionarios	6.25583	2
Vitacura	Factor 1: Información de unidades municipales y funcionarios	8.78631	2
Yerbas Buenas	Factor 1: Información de unidades municipales y funcionarios	8.78631	2
Yumbel	Factor 1: Información de unidades municipales y funcionarios	8.25417	2
Yungay	Factor 1: Información de unidades municipales y funcionarios	8.78631	2
Zapallar	Factor 1: Información de unidades municipales y funcionarios	8.78631	2
Isla de Maipo	Factor 2: Integración	1.90577	3
Algarrobo	Factor 2: Integración	4.17856	3
Alhué	Factor 2: Integración	0	3
Alto Biobío	Factor 2: Integración	0	3
Alto Del Carmen	Factor 2: Integración	1.42157	3
Alto Hospicio	Factor 2: Integración	0	3
Ancud	Factor 2: Integración	7.30076	3
Andacollo	Factor 2: Integración	0	3
Angol	Factor 2: Integración	1.50795	3
Antofagasta	Factor 2: Integración	7.30076	3
Antuco	Factor 2: Integración	0	3
Arauco	Factor 2: Integración	0	3
Arica	Factor 2: Integración	0	3
Aysén	Factor 2: Integración	5.7504	3
Buin	Factor 2: Integración	0	3
Bulnes	Factor 2: Integración	0	3
Cabildo	Factor 2: Integración	3.50295	3
Cabo De Hornos	Factor 2: Integración	1.96143	3
Cabrero	Factor 2: Integración	0	3
Calama	Factor 2: Integración	0	3
Calbuco	Factor 2: Integración	0	3
Caldera	Factor 2: Integración	0	3
Calera	Factor 2: Integración	1.15208	3
Calera De Tango	Factor 2: Integración	0	3
Calle Larga	Factor 2: Integración	1.92539	3
Camarones	Factor 2: Integración	0.4842	3
Camiña	Factor 2: Integración	0	3
Canela	Factor 2: Integración	0	3
Cañete	Factor 2: Integración	0	3
Carahue	Factor 2: Integración	2.71459	3
Cartagena	Factor 2: Integración	0.4842	3
Casablanca	Factor 2: Integración	5.87972	3
Castro	Factor 2: Integración	0	3
Catemu	Factor 2: Integración	0	3
Cauquenes	Factor 2: Integración	0	3
Cerrillos	Factor 2: Integración	0	3
Cerro Navia	Factor 2: Integración	0	3
Chaitén	Factor 2: Integración	0	3
Chanco	Factor 2: Integración	0	3
Chañaral	Factor 2: Integración	0	3
Chépica	Factor 2: Integración	0	3
Chiguayante	Factor 2: Integración	7.30076	3
Chile Chico	Factor 2: Integración	0	3
Chillán	Factor 2: Integración	7.30076	3
Chillán Viejo	Factor 2: Integración	0	3
Chimbarongo	Factor 2: Integración	3.42824	3
Cholchol	Factor 2: Integración	1.99215	3
Chonchi	Factor 2: Integración	0	3
Cisnes	Factor 2: Integración	1.45708	3
Cobquecura	Factor 2: Integración	0.4842	3
Cochamó	Factor 2: Integración	0	3
Cochrane	Factor 2: Integración	0	3
Codegua	Factor 2: Integración	0	3
Coelemu	Factor 2: Integración	0	3
Coihueco	Factor 2: Integración	0	3
Coinco	Factor 2: Integración	0	3
Colbún	Factor 2: Integración	0	3
Colchane	Factor 2: Integración	0	3
Colina	Factor 2: Integración	0	3
Collipulli	Factor 2: Integración	2.82056	3
Coltauco	Factor 2: Integración	0	3
Combarbalá	Factor 2: Integración	0	3
Concepción	Factor 2: Integración	0	3
Conchalí	Factor 2: Integración	0	3
Concón	Factor 2: Integración	4.36582	3
Constitución	Factor 2: Integración	0	3
Contulmo	Factor 2: Integración	0	3
Copiapó	Factor 2: Integración	0.4842	3
Coquimbo	Factor 2: Integración	0	3
Coronel	Factor 2: Integración	0	3
Corral	Factor 2: Integración	0	3
Coyhaique	Factor 2: Integración	4.34898	3
Cunco	Factor 2: Integración	5.18906	3
Curacautín	Factor 2: Integración	4.08106	3
Curacaví	Factor 2: Integración	0	3
Curaco De Vélez	Factor 2: Integración	0.4842	3
Curanilahue	Factor 2: Integración	7.30076	3
Curarrehue	Factor 2: Integración	0.754256	3
Curepto	Factor 2: Integración	0	3
Curicó	Factor 2: Integración	0	3
Dalcahue	Factor 2: Integración	0	3
Diego De Almagro	Factor 2: Integración	1.42157	3
Doñihue	Factor 2: Integración	0	3
El Bosque	Factor 2: Integración	0	3
El Carmen	Factor 2: Integración	0.4842	3
El Monte	Factor 2: Integración	0	3
El Quisco	Factor 2: Integración	5.65862	3
El Tabo	Factor 2: Integración	5.0109	3
Empedrado	Factor 2: Integración	0	3
Ercilla	Factor 2: Integración	1.99215	3
Estación Central	Factor 2: Integración	0	3
Florida	Factor 2: Integración	0	3
Freire	Factor 2: Integración	0.4842	3
Freirina	Factor 2: Integración	0	3
Fresia	Factor 2: Integración	0	3
Frutillar	Factor 2: Integración	0.4842	3
Futaleufú	Factor 2: Integración	7.30076	3
Futrono	Factor 2: Integración	0	3
Galvarino	Factor 2: Integración	2.66003	3
General Lagos	Factor 2: Integración	0	3
Gorbea	Factor 2: Integración	5.0109	3
Graneros	Factor 2: Integración	0	3
Guaitecas	Factor 2: Integración	3.3268	3
Hijuelas	Factor 2: Integración	1.50795	3
Hualaihué	Factor 2: Integración	0	3
Hualañé	Factor 2: Integración	0	3
Hualpén	Factor 2: Integración	0	3
Hualqui	Factor 2: Integración	6.81656	3
Huara	Factor 2: Integración	0	3
Huasco	Factor 2: Integración	1.42157	3
Huechuraba	Factor 2: Integración	0	3
Illapel	Factor 2: Integración	0	3
Independencia	Factor 2: Integración	0	3
Iquique	Factor 2: Integración	5.50096	3
Juan Fernández	Factor 2: Integración	0.667876	3
La Cisterna	Factor 2: Integración	7.30076	3
La Cruz	Factor 2: Integración	1.99215	3
La Estrella	Factor 2: Integración	0	3
La Florida	Factor 2: Integración	7.30076	3
La Granja	Factor 2: Integración	0	3
La Higuera	Factor 2: Integración	0	3
La Ligua	Factor 2: Integración	2.55349	3
La Pintana	Factor 2: Integración	0.4842	3
La Reina	Factor 2: Integración	3.42824	3
La Serena	Factor 2: Integración	0	3
La Unión	Factor 2: Integración	0.4842	3
Lago Ranco	Factor 2: Integración	0	3
Lago Verde	Factor 2: Integración	0	3
Laguna Blanca	Factor 2: Integración	0	3
Laja	Factor 2: Integración	0	3
Lampa	Factor 2: Integración	0	3
Lanco	Factor 2: Integración	0	3
Las Cabras	Factor 2: Integración	0	3
Las Condes	Factor 2: Integración	7.30076	3
Lautaro	Factor 2: Integración	0.667876	3
Lebu	Factor 2: Integración	0	3
Licantén	Factor 2: Integración	0	3
Limache	Factor 2: Integración	5.0109	3
Linares	Factor 2: Integración	0	3
Litueche	Factor 2: Integración	0	3
Llaillay	Factor 2: Integración	0.754256	3
Llanquihue	Factor 2: Integración	0	3
Lo Barnechea	Factor 2: Integración	7.30076	3
Lo Espejo	Factor 2: Integración	0	3
Lo Prado	Factor 2: Integración	0	3
Lolol	Factor 2: Integración	0	3
Loncoche	Factor 2: Integración	3.42824	3
Longaví	Factor 2: Integración	0	3
Lonquimay	Factor 2: Integración	3.43334	3
Los Álamos	Factor 2: Integración	0	3
Los Andes	Factor 2: Integración	1.40142	3
Los Ángeles	Factor 2: Integración	2.94404	3
Los Lagos	Factor 2: Integración	0	3
Los Muermos	Factor 2: Integración	0	3
Los Sauces	Factor 2: Integración	3.46938	3
Los Vilos	Factor 2: Integración	0	3
Lota	Factor 2: Integración	0	3
Lumaco	Factor 2: Integración	4.18139	3
Machalí	Factor 2: Integración	6.81656	3
Macul	Factor 2: Integración	0	3
Máfil	Factor 2: Integración	0	3
Maipú	Factor 2: Integración	3.42824	3
Malloa	Factor 2: Integración	0	3
Marchihue	Factor 2: Integración	0	3
María Elena	Factor 2: Integración	0	3
María Pinto	Factor 2: Integración	0	3
Mariquina	Factor 2: Integración	0	3
Maule	Factor 2: Integración	0	3
Maullín	Factor 2: Integración	0	3
Mejillones	Factor 2: Integración	0.4842	3
Melipeuco	Factor 2: Integración	4.07596	3
Melipilla	Factor 2: Integración	0	3
Molina	Factor 2: Integración	0	3
Monte Patria	Factor 2: Integración	0	3
Mostazal	Factor 2: Integración	7.30076	3
Mulchén	Factor 2: Integración	0	3
Nacimiento	Factor 2: Integración	0	3
Nancagua	Factor 2: Integración	7.30076	3
Natales	Factor 2: Integración	0.4842	3
Navidad	Factor 2: Integración	0	3
Negrete	Factor 2: Integración	0	3
Ninhue	Factor 2: Integración	0	3
Nogales	Factor 2: Integración	0	3
Nueva Imperial	Factor 2: Integración	4.24269	3
Ñiquén	Factor 2: Integración	0	3
Ñuñoa	Factor 2: Integración	0	3
O'Higgins	Factor 2: Integración	0	3
Olivar	Factor 2: Integración	0	3
Ollagüe	Factor 2: Integración	0	3
Olmué	Factor 2: Integración	5.18906	3
Osorno	Factor 2: Integración	0	3
Ovalle	Factor 2: Integración	0	3
Padre Hurtado	Factor 2: Integración	1.90577	3
Padre Las Casas	Factor 2: Integración	5.18906	3
Paiguano	Factor 2: Integración	0	3
Paillaco	Factor 2: Integración	0	3
Paine	Factor 2: Integración	0.4842	3
Palena	Factor 2: Integración	0	3
Palmilla	Factor 2: Integración	0	3
Panguipulli	Factor 2: Integración	0	3
Panquehue	Factor 2: Integración	3.3268	3
Papudo	Factor 2: Integración	3.58877	3
Paredones	Factor 2: Integración	0	3
Parral	Factor 2: Integración	2.18978	3
Pedro Aguirre Cerda	Factor 2: Integración	0	3
Pelarco	Factor 2: Integración	0	3
Pelluhue	Factor 2: Integración	0	3
Pemuco	Factor 2: Integración	0.4842	3
Pencahue	Factor 2: Integración	0	3
Penco	Factor 2: Integración	0	3
Peñaflor	Factor 2: Integración	3.3268	3
Peñalolén	Factor 2: Integración	6.81656	3
Peralillo	Factor 2: Integración	0	3
Perquenco	Factor 2: Integración	2.66003	3
Petorca	Factor 2: Integración	4.34303	3
Peumo	Factor 2: Integración	0	3
Pica	Factor 2: Integración	0.4842	3
Pichidegua	Factor 2: Integración	0	3
Pichilemu	Factor 2: Integración	0	3
Pinto	Factor 2: Integración	0	3
Pirque	Factor 2: Integración	0	3
Pitrufquén	Factor 2: Integración	3.41318	3
Placilla	Factor 2: Integración	0	3
Portezuelo	Factor 2: Integración	7.30076	3
Porvenir	Factor 2: Integración	0	3
Pozo Almonte	Factor 2: Integración	0	3
Primavera	Factor 2: Integración	0	3
Providencia	Factor 2: Integración	7.30076	3
Puchuncaví	Factor 2: Integración	4.26548	3
Pucón	Factor 2: Integración	4.89041	3
Pudahuel	Factor 2: Integración	0	3
Puente Alto	Factor 2: Integración	0	3
Puerto Montt	Factor 2: Integración	0	3
Puerto Octay	Factor 2: Integración	0	3
Puerto Varas	Factor 2: Integración	0	3
Pumanque	Factor 2: Integración	0	3
Punitaqui	Factor 2: Integración	0	3
Punta Arenas	Factor 2: Integración	2.73474	3
Puqueldón	Factor 2: Integración	0	3
Purén	Factor 2: Integración	2.77942	3
Purranque	Factor 2: Integración	0	3
Putaendo	Factor 2: Integración	4.24269	3
Putre	Factor 2: Integración	0.4842	3
Puyehue	Factor 2: Integración	0	3
Queilén	Factor 2: Integración	0	3
Quellón	Factor 2: Integración	0	3
Quemchi	Factor 2: Integración	0.4842	3
Quilaco	Factor 2: Integración	0	3
Quilicura	Factor 2: Integración	7.30076	3
Quilleco	Factor 2: Integración	0	3
Quillón	Factor 2: Integración	0	3
Quillota	Factor 2: Integración	6.45473	3
Quilpué	Factor 2: Integración	3.47064	3
Quinchao	Factor 2: Integración	0	3
Quinta De Tilcoco	Factor 2: Integración	0	3
Quinta Normal	Factor 2: Integración	0.4842	3
Quintero	Factor 2: Integración	0.4842	3
Quirihue	Factor 2: Integración	0	3
Rancagua	Factor 2: Integración	0	3
Ránquil	Factor 2: Integración	0.76821	3
Rauco	Factor 2: Integración	0	3
Recoleta	Factor 2: Integración	0	3
Renaico	Factor 2: Integración	1.2379	3
Renca	Factor 2: Integración	0	3
Rengo	Factor 2: Integración	0	3
Requínoa	Factor 2: Integración	0	3
Retiro	Factor 2: Integración	0	3
Rinconada	Factor 2: Integración	5.65862	3
Río Bueno	Factor 2: Integración	0	3
Río Claro	Factor 2: Integración	0	3
Río Hurtado	Factor 2: Integración	0	3
Río Ibáñez	Factor 2: Integración	1.96143	3
Río Negro	Factor 2: Integración	0	3
Río Verde	Factor 2: Integración	2.25054	3
Romeral	Factor 2: Integración	0	3
Saavedra	Factor 2: Integración	1.58267	3
Sagrada Familia	Factor 2: Integración	0	3
Salamanca	Factor 2: Integración	0	3
San Antonio	Factor 2: Integración	6.45473	3
San Bernardo	Factor 2: Integración	0	3
San Carlos	Factor 2: Integración	0	3
San Clemente	Factor 2: Integración	0	3
San Esteban	Factor 2: Integración	3.44729	3
San Fabián	Factor 2: Integración	0	3
San Felipe	Factor 2: Integración	6.45473	3
San Fernando	Factor 2: Integración	7.30076	3
San Gregorio	Factor 2: Integración	2.94404	3
San Ignacio	Factor 2: Integración	0	3
San Javier	Factor 2: Integración	6.81656	3
San Joaquín	Factor 2: Integración	6.81656	3
San José De Maipo	Factor 2: Integración	0	3
San Juan De La Costa	Factor 2: Integración	3.42824	3
San Miguel	Factor 2: Integración	0	3
San Nicolás	Factor 2: Integración	0	3
San Pablo	Factor 2: Integración	0	3
San Pedro	Factor 2: Integración	0	3
San Pedro De Atacama	Factor 2: Integración	0	3
San Pedro De La Paz	Factor 2: Integración	0	3
San Rafael	Factor 2: Integración	0	3
San Ramón	Factor 2: Integración	0	3
San Rosendo	Factor 2: Integración	0.4842	3
San Vicente	Factor 2: Integración	0	3
Santa Bárbara	Factor 2: Integración	2.67398	3
Santa Cruz	Factor 2: Integración	0	3
Santa Juana	Factor 2: Integración	0	3
Santa María	Factor 2: Integración	1.29356	3
Santiago	Factor 2: Integración	7.30076	3
Santo Domingo	Factor 2: Integración	4.13616	3
Sierra Gorda	Factor 2: Integración	0.4842	3
Talagante	Factor 2: Integración	3.87252	3
Talca	Factor 2: Integración	0	3
Talcahuano	Factor 2: Integración	0.4842	3
Taltal	Factor 2: Integración	0	3
Temuco	Factor 2: Integración	5.0109	3
Teno	Factor 2: Integración	0	3
Teodoro Schmidt	Factor 2: Integración	5.03879	3
Tierra Amarilla	Factor 2: Integración	0	3
Tiltil	Factor 2: Integración	3.87252	3
Timaukel	Factor 2: Integración	0	3
Tirúa	Factor 2: Integración	0	3
Tocopilla	Factor 2: Integración	0	3
Toltén	Factor 2: Integración	2.28126	3
Tomé	Factor 2: Integración	2.94404	3
Torres Del Paine	Factor 2: Integración	0	3
Tortel	Factor 2: Integración	2.03456	3
Traiguén	Factor 2: Integración	4.24269	3
Treguaco	Factor 2: Integración	0	3
Tucapel	Factor 2: Integración	0	3
Valdivia	Factor 2: Integración	0.4842	3
Vallenar	Factor 2: Integración	1.90577	3
Valparaíso	Factor 2: Integración	4.34303	3
Vichuquén	Factor 2: Integración	0	3
Victoria	Factor 2: Integración	6.45473	3
Vicuña	Factor 2: Integración	0	3
Vilcún	Factor 2: Integración	4.88531	3
Villa Alegre	Factor 2: Integración	0	3
Villa Alemana	Factor 2: Integración	3.32226	3
Villarrica	Factor 2: Integración	3.59686	3
Viña Del Mar	Factor 2: Integración	1.23846	3
Vitacura	Factor 2: Integración	6.81656	3
Yerbas Buenas	Factor 2: Integración	0	3
Yumbel	Factor 2: Integración	0	3
Yungay	Factor 2: Integración	0	3
Zapallar	Factor 2: Integración	2.00611	3
Isla de Maipo	Factor 3: Transparencia	4.5646	4
Algarrobo	Factor 3: Transparencia	7.02467	4
Alhué	Factor 3: Transparencia	7.02467	4
Alto Biobío	Factor 3: Transparencia	7.02467	4
Alto Del Carmen	Factor 3: Transparencia	7.02467	4
Alto Hospicio	Factor 3: Transparencia	0	4
Ancud	Factor 3: Transparencia	7.02467	4
Andacollo	Factor 3: Transparencia	6.4116	4
Angol	Factor 3: Transparencia	7.02467	4
Antofagasta	Factor 3: Transparencia	7.02467	4
Antuco	Factor 3: Transparencia	7.02467	4
Arauco	Factor 3: Transparencia	7.02467	4
Arica	Factor 3: Transparencia	5.24614	4
Aysén	Factor 3: Transparencia	7.02467	4
Buin	Factor 3: Transparencia	7.02467	4
Bulnes	Factor 3: Transparencia	7.02467	4
Cabildo	Factor 3: Transparencia	7.02467	4
Cabo De Hornos	Factor 3: Transparencia	7.02467	4
Cabrero	Factor 3: Transparencia	7.02467	4
Calama	Factor 3: Transparencia	3.67076	4
Calbuco	Factor 3: Transparencia	7.02467	4
Caldera	Factor 3: Transparencia	7.02467	4
Calera	Factor 3: Transparencia	7.02467	4
Calera De Tango	Factor 3: Transparencia	0	4
Calle Larga	Factor 3: Transparencia	7.02467	4
Camarones	Factor 3: Transparencia	7.02467	4
Camiña	Factor 3: Transparencia	4.78695	4
Canela	Factor 3: Transparencia	7.02467	4
Cañete	Factor 3: Transparencia	7.02467	4
Carahue	Factor 3: Transparencia	7.02467	4
Cartagena	Factor 3: Transparencia	7.02467	4
Casablanca	Factor 3: Transparencia	7.02467	4
Castro	Factor 3: Transparencia	7.02467	4
Catemu	Factor 3: Transparencia	7.02467	4
Cauquenes	Factor 3: Transparencia	7.02467	4
Cerrillos	Factor 3: Transparencia	7.02467	4
Cerro Navia	Factor 3: Transparencia	7.02467	4
Chaitén	Factor 3: Transparencia	7.02467	4
Chanco	Factor 3: Transparencia	7.02467	4
Chañaral	Factor 3: Transparencia	7.02467	4
Chépica	Factor 3: Transparencia	7.02467	4
Chiguayante	Factor 3: Transparencia	7.02467	4
Chile Chico	Factor 3: Transparencia	7.02467	4
Chillán	Factor 3: Transparencia	7.02467	4
Chillán Viejo	Factor 3: Transparencia	6.4116	4
Chimbarongo	Factor 3: Transparencia	7.02467	4
Cholchol	Factor 3: Transparencia	7.02467	4
Chonchi	Factor 3: Transparencia	7.02467	4
Cisnes	Factor 3: Transparencia	7.02467	4
Cobquecura	Factor 3: Transparencia	7.02467	4
Cochamó	Factor 3: Transparencia	7.02467	4
Cochrane	Factor 3: Transparencia	6.4116	4
Codegua	Factor 3: Transparencia	7.02467	4
Coelemu	Factor 3: Transparencia	7.02467	4
Coihueco	Factor 3: Transparencia	7.02467	4
Coinco	Factor 3: Transparencia	7.02467	4
Colbún	Factor 3: Transparencia	7.02467	4
Colchane	Factor 3: Transparencia	7.02467	4
Colina	Factor 3: Transparencia	7.02467	4
Collipulli	Factor 3: Transparencia	7.02467	4
Coltauco	Factor 3: Transparencia	7.02467	4
Combarbalá	Factor 3: Transparencia	7.02467	4
Concepción	Factor 3: Transparencia	7.02467	4
Conchalí	Factor 3: Transparencia	7.02467	4
Concón	Factor 3: Transparencia	4.47764	4
Constitución	Factor 3: Transparencia	7.02467	4
Contulmo	Factor 3: Transparencia	7.02467	4
Copiapó	Factor 3: Transparencia	6.4116	4
Coquimbo	Factor 3: Transparencia	7.02467	4
Coronel	Factor 3: Transparencia	7.02467	4
Corral	Factor 3: Transparencia	0	4
Coyhaique	Factor 3: Transparencia	7.02467	4
Cunco	Factor 3: Transparencia	7.02467	4
Curacautín	Factor 3: Transparencia	6.20689	4
Curacaví	Factor 3: Transparencia	7.02467	4
Curaco De Vélez	Factor 3: Transparencia	7.02467	4
Curanilahue	Factor 3: Transparencia	7.02467	4
Curarrehue	Factor 3: Transparencia	7.02467	4
Curepto	Factor 3: Transparencia	2.33001	4
Curicó	Factor 3: Transparencia	7.02467	4
Dalcahue	Factor 3: Transparencia	7.02467	4
Diego De Almagro	Factor 3: Transparencia	7.02467	4
Doñihue	Factor 3: Transparencia	7.02467	4
El Bosque	Factor 3: Transparencia	7.02467	4
El Carmen	Factor 3: Transparencia	7.02467	4
El Monte	Factor 3: Transparencia	7.02467	4
El Quisco	Factor 3: Transparencia	7.02467	4
El Tabo	Factor 3: Transparencia	7.02467	4
Empedrado	Factor 3: Transparencia	7.02467	4
Ercilla	Factor 3: Transparencia	7.02467	4
Estación Central	Factor 3: Transparencia	7.02467	4
Florida	Factor 3: Transparencia	7.02467	4
Freire	Factor 3: Transparencia	7.02467	4
Freirina	Factor 3: Transparencia	7.02467	4
Fresia	Factor 3: Transparencia	7.02467	4
Frutillar	Factor 3: Transparencia	7.02467	4
Futaleufú	Factor 3: Transparencia	7.02467	4
Futrono	Factor 3: Transparencia	7.02467	4
Galvarino	Factor 3: Transparencia	7.02467	4
General Lagos	Factor 3: Transparencia	3.14779	4
Gorbea	Factor 3: Transparencia	7.02467	4
Graneros	Factor 3: Transparencia	7.02467	4
Guaitecas	Factor 3: Transparencia	7.02467	4
Hijuelas	Factor 3: Transparencia	6.4116	4
Hualaihué	Factor 3: Transparencia	7.02467	4
Hualañé	Factor 3: Transparencia	7.02467	4
Hualpén	Factor 3: Transparencia	7.02467	4
Hualqui	Factor 3: Transparencia	7.02467	4
Huara	Factor 3: Transparencia	7.02467	4
Huasco	Factor 3: Transparencia	7.02467	4
Huechuraba	Factor 3: Transparencia	7.02467	4
Illapel	Factor 3: Transparencia	7.02467	4
Independencia	Factor 3: Transparencia	7.02467	4
Iquique	Factor 3: Transparencia	4.98	4
Juan Fernández	Factor 3: Transparencia	4.75699	4
La Cisterna	Factor 3: Transparencia	7.02467	4
La Cruz	Factor 3: Transparencia	6.4116	4
La Estrella	Factor 3: Transparencia	7.02467	4
La Florida	Factor 3: Transparencia	7.02467	4
La Granja	Factor 3: Transparencia	7.02467	4
La Higuera	Factor 3: Transparencia	7.02467	4
La Ligua	Factor 3: Transparencia	7.02467	4
La Pintana	Factor 3: Transparencia	7.02467	4
La Reina	Factor 3: Transparencia	7.02467	4
La Serena	Factor 3: Transparencia	7.02467	4
La Unión	Factor 3: Transparencia	7.02467	4
Lago Ranco	Factor 3: Transparencia	7.02467	4
Lago Verde	Factor 3: Transparencia	4.72711	4
Laguna Blanca	Factor 3: Transparencia	7.02467	4
Laja	Factor 3: Transparencia	7.02467	4
Lampa	Factor 3: Transparencia	7.02467	4
Lanco	Factor 3: Transparencia	7.02467	4
Las Cabras	Factor 3: Transparencia	7.02467	4
Las Condes	Factor 3: Transparencia	7.02467	4
Lautaro	Factor 3: Transparencia	7.02467	4
Lebu	Factor 3: Transparencia	7.02467	4
Licantén	Factor 3: Transparencia	7.02467	4
Limache	Factor 3: Transparencia	7.02467	4
Linares	Factor 3: Transparencia	7.02467	4
Litueche	Factor 3: Transparencia	7.02467	4
Llaillay	Factor 3: Transparencia	7.02467	4
Llanquihue	Factor 3: Transparencia	7.02467	4
Lo Barnechea	Factor 3: Transparencia	7.02467	4
Lo Espejo	Factor 3: Transparencia	7.02467	4
Lo Prado	Factor 3: Transparencia	7.02467	4
Lolol	Factor 3: Transparencia	7.02467	4
Loncoche	Factor 3: Transparencia	7.02467	4
Longaví	Factor 3: Transparencia	7.02467	4
Lonquimay	Factor 3: Transparencia	7.02467	4
Los Álamos	Factor 3: Transparencia	7.02467	4
Los Andes	Factor 3: Transparencia	7.02467	4
Los Ángeles	Factor 3: Transparencia	7.02467	4
Los Lagos	Factor 3: Transparencia	7.02467	4
Los Muermos	Factor 3: Transparencia	7.02467	4
Los Sauces	Factor 3: Transparencia	7.02467	4
Los Vilos	Factor 3: Transparencia	7.02467	4
Lota	Factor 3: Transparencia	7.02467	4
Lumaco	Factor 3: Transparencia	7.02467	4
Machalí	Factor 3: Transparencia	7.02467	4
Macul	Factor 3: Transparencia	7.02467	4
Máfil	Factor 3: Transparencia	7.02467	4
Maipú	Factor 3: Transparencia	7.02467	4
Malloa	Factor 3: Transparencia	7.02467	4
Marchihue	Factor 3: Transparencia	7.02467	4
María Elena	Factor 3: Transparencia	0.613066	4
María Pinto	Factor 3: Transparencia	7.02467	4
Mariquina	Factor 3: Transparencia	7.02467	4
Maule	Factor 3: Transparencia	6.4116	4
Maullín	Factor 3: Transparencia	7.02467	4
Mejillones	Factor 3: Transparencia	7.02467	4
Melipeuco	Factor 3: Transparencia	7.02467	4
Melipilla	Factor 3: Transparencia	7.02467	4
Molina	Factor 3: Transparencia	7.02467	4
Monte Patria	Factor 3: Transparencia	7.02467	4
Mostazal	Factor 3: Transparencia	7.02467	4
Mulchén	Factor 3: Transparencia	7.02467	4
Nacimiento	Factor 3: Transparencia	7.02467	4
Nancagua	Factor 3: Transparencia	7.02467	4
Natales	Factor 3: Transparencia	7.02467	4
Navidad	Factor 3: Transparencia	7.02467	4
Negrete	Factor 3: Transparencia	7.02467	4
Ninhue	Factor 3: Transparencia	7.02467	4
Nogales	Factor 3: Transparencia	7.02467	4
Nueva Imperial	Factor 3: Transparencia	7.02467	4
Ñiquén	Factor 3: Transparencia	2.94308	4
Ñuñoa	Factor 3: Transparencia	7.02467	4
O'Higgins	Factor 3: Transparencia	6.20689	4
Olivar	Factor 3: Transparencia	7.02467	4
Ollagüe	Factor 3: Transparencia	0	4
Olmué	Factor 3: Transparencia	7.02467	4
Osorno	Factor 3: Transparencia	7.02467	4
Ovalle	Factor 3: Transparencia	7.02467	4
Padre Hurtado	Factor 3: Transparencia	4.47764	4
Padre Las Casas	Factor 3: Transparencia	7.02467	4
Paiguano	Factor 3: Transparencia	7.02467	4
Paillaco	Factor 3: Transparencia	7.02467	4
Paine	Factor 3: Transparencia	7.02467	4
Palena	Factor 3: Transparencia	7.02467	4
Palmilla	Factor 3: Transparencia	6.4116	4
Panguipulli	Factor 3: Transparencia	7.02467	4
Panquehue	Factor 3: Transparencia	7.02467	4
Papudo	Factor 3: Transparencia	7.02467	4
Paredones	Factor 3: Transparencia	7.02467	4
Parral	Factor 3: Transparencia	7.02467	4
Pedro Aguirre Cerda	Factor 3: Transparencia	7.02467	4
Pelarco	Factor 3: Transparencia	7.02467	4
Pelluhue	Factor 3: Transparencia	7.02467	4
Pemuco	Factor 3: Transparencia	7.02467	4
Pencahue	Factor 3: Transparencia	7.02467	4
Penco	Factor 3: Transparencia	7.02467	4
Peñaflor	Factor 3: Transparencia	6.46869	4
Peñalolén	Factor 3: Transparencia	7.02467	4
Peralillo	Factor 3: Transparencia	7.02467	4
Perquenco	Factor 3: Transparencia	7.02467	4
Petorca	Factor 3: Transparencia	7.02467	4
Peumo	Factor 3: Transparencia	7.02467	4
Pica	Factor 3: Transparencia	6.4116	4
Pichidegua	Factor 3: Transparencia	7.02467	4
Pichilemu	Factor 3: Transparencia	7.02467	4
Pinto	Factor 3: Transparencia	7.02467	4
Pirque	Factor 3: Transparencia	7.02467	4
Pitrufquén	Factor 3: Transparencia	7.02467	4
Placilla	Factor 3: Transparencia	6.4116	4
Portezuelo	Factor 3: Transparencia	7.02467	4
Porvenir	Factor 3: Transparencia	7.02467	4
Pozo Almonte	Factor 3: Transparencia	4.98	4
Primavera	Factor 3: Transparencia	7.02467	4
Providencia	Factor 3: Transparencia	7.02467	4
Puchuncaví	Factor 3: Transparencia	2.26768	4
Pucón	Factor 3: Transparencia	7.02467	4
Pudahuel	Factor 3: Transparencia	7.02467	4
Puente Alto	Factor 3: Transparencia	7.02467	4
Puerto Montt	Factor 3: Transparencia	7.02467	4
Puerto Octay	Factor 3: Transparencia	7.02467	4
Puerto Varas	Factor 3: Transparencia	7.02467	4
Pumanque	Factor 3: Transparencia	6.4116	4
Punitaqui	Factor 3: Transparencia	7.02467	4
Punta Arenas	Factor 3: Transparencia	7.02467	4
Puqueldón	Factor 3: Transparencia	7.02467	4
Purén	Factor 3: Transparencia	7.02467	4
Purranque	Factor 3: Transparencia	7.02467	4
Putaendo	Factor 3: Transparencia	7.02467	4
Putre	Factor 3: Transparencia	5.66773	4
Puyehue	Factor 3: Transparencia	7.02467	4
Queilén	Factor 3: Transparencia	7.02467	4
Quellón	Factor 3: Transparencia	7.02467	4
Quemchi	Factor 3: Transparencia	7.02467	4
Quilaco	Factor 3: Transparencia	7.02467	4
Quilicura	Factor 3: Transparencia	7.02467	4
Quilleco	Factor 3: Transparencia	7.02467	4
Quillón	Factor 3: Transparencia	7.02467	4
Quillota	Factor 3: Transparencia	7.02467	4
Quilpué	Factor 3: Transparencia	7.02467	4
Quinchao	Factor 3: Transparencia	7.02467	4
Quinta De Tilcoco	Factor 3: Transparencia	7.02467	4
Quinta Normal	Factor 3: Transparencia	7.02467	4
Quintero	Factor 3: Transparencia	6.20689	4
Quirihue	Factor 3: Transparencia	7.02467	4
Rancagua	Factor 3: Transparencia	7.02467	4
Ránquil	Factor 3: Transparencia	7.02467	4
Rauco	Factor 3: Transparencia	7.02467	4
Recoleta	Factor 3: Transparencia	7.02467	4
Renaico	Factor 3: Transparencia	6.46869	4
Renca	Factor 3: Transparencia	7.02467	4
Rengo	Factor 3: Transparencia	7.02467	4
Requínoa	Factor 3: Transparencia	7.02467	4
Retiro	Factor 3: Transparencia	7.02467	4
Rinconada	Factor 3: Transparencia	5.86011	4
Río Bueno	Factor 3: Transparencia	7.02467	4
Río Claro	Factor 3: Transparencia	7.02467	4
Río Hurtado	Factor 3: Transparencia	7.02467	4
Río Ibáñez	Factor 3: Transparencia	7.02467	4
Río Negro	Factor 3: Transparencia	7.02467	4
Río Verde	Factor 3: Transparencia	7.02467	4
Romeral	Factor 3: Transparencia	7.02467	4
Saavedra	Factor 3: Transparencia	7.02467	4
Sagrada Familia	Factor 3: Transparencia	7.02467	4
Salamanca	Factor 3: Transparencia	7.02467	4
San Antonio	Factor 3: Transparencia	7.02467	4
San Bernardo	Factor 3: Transparencia	7.02467	4
San Carlos	Factor 3: Transparencia	7.02467	4
San Clemente	Factor 3: Transparencia	7.02467	4
San Esteban	Factor 3: Transparencia	7.02467	4
San Fabián	Factor 3: Transparencia	7.02467	4
San Felipe	Factor 3: Transparencia	7.02467	4
San Fernando	Factor 3: Transparencia	7.02467	4
San Gregorio	Factor 3: Transparencia	7.02467	4
San Ignacio	Factor 3: Transparencia	7.02467	4
San Javier	Factor 3: Transparencia	7.02467	4
San Joaquín	Factor 3: Transparencia	7.02467	4
San José De Maipo	Factor 3: Transparencia	7.02467	4
San Juan De La Costa	Factor 3: Transparencia	7.02467	4
San Miguel	Factor 3: Transparencia	7.02467	4
San Nicolás	Factor 3: Transparencia	7.02467	4
San Pablo	Factor 3: Transparencia	7.02467	4
San Pedro	Factor 3: Transparencia	7.02467	4
San Pedro De Atacama	Factor 3: Transparencia	7.02467	4
San Pedro De La Paz	Factor 3: Transparencia	7.02467	4
San Rafael	Factor 3: Transparencia	7.02467	4
San Ramón	Factor 3: Transparencia	7.02467	4
San Rosendo	Factor 3: Transparencia	7.02467	4
San Vicente	Factor 3: Transparencia	7.02467	4
Santa Bárbara	Factor 3: Transparencia	7.02467	4
Santa Cruz	Factor 3: Transparencia	6.4116	4
Santa Juana	Factor 3: Transparencia	7.02467	4
Santa María	Factor 3: Transparencia	6.4116	4
Santiago	Factor 3: Transparencia	7.02467	4
Santo Domingo	Factor 3: Transparencia	7.02467	4
Sierra Gorda	Factor 3: Transparencia	7.02467	4
Talagante	Factor 3: Transparencia	7.02467	4
Talca	Factor 3: Transparencia	7.02467	4
Talcahuano	Factor 3: Transparencia	7.02467	4
Taltal	Factor 3: Transparencia	7.02467	4
Temuco	Factor 3: Transparencia	7.02467	4
Teno	Factor 3: Transparencia	7.02467	4
Teodoro Schmidt	Factor 3: Transparencia	7.02467	4
Tierra Amarilla	Factor 3: Transparencia	7.02467	4
Tiltil	Factor 3: Transparencia	7.02467	4
Timaukel	Factor 3: Transparencia	7.02467	4
Tirúa	Factor 3: Transparencia	6.4116	4
Tocopilla	Factor 3: Transparencia	7.02467	4
Toltén	Factor 3: Transparencia	7.02467	4
Tomé	Factor 3: Transparencia	7.02467	4
Torres Del Paine	Factor 3: Transparencia	7.02467	4
Tortel	Factor 3: Transparencia	7.02467	4
Traiguén	Factor 3: Transparencia	6.20689	4
Treguaco	Factor 3: Transparencia	7.02467	4
Tucapel	Factor 3: Transparencia	7.02467	4
Valdivia	Factor 3: Transparencia	7.02467	4
Vallenar	Factor 3: Transparencia	7.02467	4
Valparaíso	Factor 3: Transparencia	7.02467	4
Vichuquén	Factor 3: Transparencia	7.02467	4
Victoria	Factor 3: Transparencia	3.87548	4
Vicuña	Factor 3: Transparencia	7.02467	4
Vilcún	Factor 3: Transparencia	7.02467	4
Villa Alegre	Factor 3: Transparencia	7.02467	4
Villa Alemana	Factor 3: Transparencia	7.02467	4
Villarrica	Factor 3: Transparencia	7.02467	4
Viña Del Mar	Factor 3: Transparencia	7.02467	4
Vitacura	Factor 3: Transparencia	7.02467	4
Yerbas Buenas	Factor 3: Transparencia	7.02467	4
Yumbel	Factor 3: Transparencia	7.02467	4
Yungay	Factor 3: Transparencia	7.02467	4
Zapallar	Factor 3: Transparencia	7.02467	4
Isla de Maipo	Factor 4: Información Educacional y de Salud	1.4888	5
Algarrobo	Factor 4: Información Educacional y de Salud	4.8253	5
Alhué	Factor 4: Información Educacional y de Salud	0	5
Alto Biobío	Factor 4: Información Educacional y de Salud	0	5
Alto Del Carmen	Factor 4: Información Educacional y de Salud	1.47647	5
Alto Hospicio	Factor 4: Información Educacional y de Salud	0	5
Ancud	Factor 4: Información Educacional y de Salud	0	5
Andacollo	Factor 4: Información Educacional y de Salud	0	5
Angol	Factor 4: Información Educacional y de Salud	3.67865	5
Antofagasta	Factor 4: Información Educacional y de Salud	1.87645	5
Antuco	Factor 4: Información Educacional y de Salud	0	5
Arauco	Factor 4: Información Educacional y de Salud	0	5
Arica	Factor 4: Información Educacional y de Salud	1.33435	5
Aysén	Factor 4: Información Educacional y de Salud	2.0926	5
Buin	Factor 4: Información Educacional y de Salud	0	5
Bulnes	Factor 4: Información Educacional y de Salud	3.03261	5
Cabildo	Factor 4: Información Educacional y de Salud	4.60373	5
Cabo De Hornos	Factor 4: Información Educacional y de Salud	1.33435	5
Cabrero	Factor 4: Información Educacional y de Salud	0	5
Calama	Factor 4: Información Educacional y de Salud	0	5
Calbuco	Factor 4: Información Educacional y de Salud	0	5
Caldera	Factor 4: Información Educacional y de Salud	0	5
Calera	Factor 4: Información Educacional y de Salud	1.33435	5
Calera De Tango	Factor 4: Información Educacional y de Salud	0.797898	5
Calle Larga	Factor 4: Información Educacional y de Salud	5.57125	5
Camarones	Factor 4: Información Educacional y de Salud	2.84728	5
Camiña	Factor 4: Información Educacional y de Salud	0	5
Canela	Factor 4: Información Educacional y de Salud	0	5
Cañete	Factor 4: Información Educacional y de Salud	5.82794	5
Carahue	Factor 4: Información Educacional y de Salud	0.643455	5
Cartagena	Factor 4: Información Educacional y de Salud	1.44135	5
Casablanca	Factor 4: Información Educacional y de Salud	5.82794	5
Castro	Factor 4: Información Educacional y de Salud	0	5
Catemu	Factor 4: Información Educacional y de Salud	1.51969	5
Cauquenes	Factor 4: Información Educacional y de Salud	0	5
Cerrillos	Factor 4: Información Educacional y de Salud	0	5
Cerro Navia	Factor 4: Información Educacional y de Salud	0	5
Chaitén	Factor 4: Información Educacional y de Salud	0	5
Chanco	Factor 4: Información Educacional y de Salud	0	5
Chañaral	Factor 4: Información Educacional y de Salud	0	5
Chépica	Factor 4: Información Educacional y de Salud	4.23307	5
Chiguayante	Factor 4: Información Educacional y de Salud	0	5
Chile Chico	Factor 4: Información Educacional y de Salud	0	5
Chillán	Factor 4: Información Educacional y de Salud	0	5
Chillán Viejo	Factor 4: Información Educacional y de Salud	0	5
Chimbarongo	Factor 4: Información Educacional y de Salud	0.761444	5
Cholchol	Factor 4: Información Educacional y de Salud	1.33435	5
Chonchi	Factor 4: Información Educacional y de Salud	0	5
Cisnes	Factor 4: Información Educacional y de Salud	0.643455	5
Cobquecura	Factor 4: Información Educacional y de Salud	2.1996	5
Cochamó	Factor 4: Información Educacional y de Salud	0	5
Cochrane	Factor 4: Información Educacional y de Salud	0.643455	5
Codegua	Factor 4: Información Educacional y de Salud	0.797898	5
Coelemu	Factor 4: Información Educacional y de Salud	0	5
Coihueco	Factor 4: Información Educacional y de Salud	0	5
Coinco	Factor 4: Información Educacional y de Salud	2.86268	5
Colbún	Factor 4: Información Educacional y de Salud	2.31341	5
Colchane	Factor 4: Información Educacional y de Salud	0	5
Colina	Factor 4: Información Educacional y de Salud	4.36955	5
Collipulli	Factor 4: Información Educacional y de Salud	1.51969	5
Coltauco	Factor 4: Información Educacional y de Salud	0	5
Combarbalá	Factor 4: Información Educacional y de Salud	0	5
Concepción	Factor 4: Información Educacional y de Salud	0	5
Conchalí	Factor 4: Información Educacional y de Salud	1.51969	5
Concón	Factor 4: Información Educacional y de Salud	4.93969	5
Constitución	Factor 4: Información Educacional y de Salud	0	5
Contulmo	Factor 4: Información Educacional y de Salud	0	5
Copiapó	Factor 4: Información Educacional y de Salud	0	5
Coquimbo	Factor 4: Información Educacional y de Salud	2.62912	5
Coronel	Factor 4: Información Educacional y de Salud	0	5
Corral	Factor 4: Información Educacional y de Salud	2.85404	5
Coyhaique	Factor 4: Información Educacional y de Salud	2.62669	5
Cunco	Factor 4: Información Educacional y de Salud	1.55873	5
Curacautín	Factor 4: Información Educacional y de Salud	3.38814	5
Curacaví	Factor 4: Información Educacional y de Salud	0	5
Curaco De Vélez	Factor 4: Información Educacional y de Salud	0	5
Curanilahue	Factor 4: Información Educacional y de Salud	6.93454	5
Curarrehue	Factor 4: Información Educacional y de Salud	2.32017	5
Curepto	Factor 4: Información Educacional y de Salud	0	5
Curicó	Factor 4: Información Educacional y de Salud	3.43518	5
Dalcahue	Factor 4: Información Educacional y de Salud	0	5
Diego De Almagro	Factor 4: Información Educacional y de Salud	1.55934	5
Doñihue	Factor 4: Información Educacional y de Salud	0	5
El Bosque	Factor 4: Información Educacional y de Salud	3.65452	5
El Carmen	Factor 4: Información Educacional y de Salud	0	5
El Monte	Factor 4: Información Educacional y de Salud	1.51551	5
El Quisco	Factor 4: Información Educacional y de Salud	6.15987	5
El Tabo	Factor 4: Información Educacional y de Salud	2.16314	5
Empedrado	Factor 4: Información Educacional y de Salud	0	5
Ercilla	Factor 4: Información Educacional y de Salud	2.31759	5
Estación Central	Factor 4: Información Educacional y de Salud	2.77468	5
Florida	Factor 4: Información Educacional y de Salud	0	5
Freire	Factor 4: Información Educacional y de Salud	4.11027	5
Freirina	Factor 4: Información Educacional y de Salud	0	5
Fresia	Factor 4: Información Educacional y de Salud	0	5
Frutillar	Factor 4: Información Educacional y de Salud	2.96527	5
Futaleufú	Factor 4: Información Educacional y de Salud	5.82794	5
Futrono	Factor 4: Información Educacional y de Salud	0	5
Galvarino	Factor 4: Información Educacional y de Salud	0.643455	5
General Lagos	Factor 4: Información Educacional y de Salud	0	5
Gorbea	Factor 4: Información Educacional y de Salud	5.70154	5
Graneros	Factor 4: Información Educacional y de Salud	0	5
Guaitecas	Factor 4: Información Educacional y de Salud	2.0926	5
Hijuelas	Factor 4: Información Educacional y de Salud	6.15987	5
Hualaihué	Factor 4: Información Educacional y de Salud	0	5
Hualañé	Factor 4: Información Educacional y de Salud	0	5
Hualpén	Factor 4: Información Educacional y de Salud	7.39287	5
Hualqui	Factor 4: Información Educacional y de Salud	0	5
Huara	Factor 4: Información Educacional y de Salud	0	5
Huasco	Factor 4: Información Educacional y de Salud	0	5
Huechuraba	Factor 4: Información Educacional y de Salud	6.93454	5
Illapel	Factor 4: Información Educacional y de Salud	0	5
Independencia	Factor 4: Información Educacional y de Salud	5.68542	5
Iquique	Factor 4: Información Educacional y de Salud	2.37243	5
Juan Fernández	Factor 4: Información Educacional y de Salud	4.38692	5
La Cisterna	Factor 4: Información Educacional y de Salud	6.40044	5
La Cruz	Factor 4: Información Educacional y de Salud	6.2017	5
La Estrella	Factor 4: Información Educacional y de Salud	0	5
La Florida	Factor 4: Información Educacional y de Salud	0	5
La Granja	Factor 4: Información Educacional y de Salud	2.96527	5
La Higuera	Factor 4: Información Educacional y de Salud	0.797898	5
La Ligua	Factor 4: Información Educacional y de Salud	2.59317	5
La Pintana	Factor 4: Información Educacional y de Salud	3.62835	5
La Reina	Factor 4: Información Educacional y de Salud	0	5
La Serena	Factor 4: Información Educacional y de Salud	0	5
La Unión	Factor 4: Información Educacional y de Salud	5.82794	5
Lago Ranco	Factor 4: Información Educacional y de Salud	0	5
Lago Verde	Factor 4: Información Educacional y de Salud	2.86268	5
Laguna Blanca	Factor 4: Información Educacional y de Salud	2.16314	5
Laja	Factor 4: Información Educacional y de Salud	2.86268	5
Lampa	Factor 4: Información Educacional y de Salud	0	5
Lanco	Factor 4: Información Educacional y de Salud	0	5
Las Cabras	Factor 4: Información Educacional y de Salud	0	5
Las Condes	Factor 4: Información Educacional y de Salud	7.39287	5
Lautaro	Factor 4: Información Educacional y de Salud	3.65452	5
Lebu	Factor 4: Información Educacional y de Salud	0	5
Licantén	Factor 4: Información Educacional y de Salud	7.85463	5
Limache	Factor 4: Información Educacional y de Salud	3.88612	5
Linares	Factor 4: Información Educacional y de Salud	4.29984	5
Litueche	Factor 4: Información Educacional y de Salud	5.03005	5
Llaillay	Factor 4: Información Educacional y de Salud	2.28928	5
Llanquihue	Factor 4: Información Educacional y de Salud	0	5
Lo Barnechea	Factor 4: Información Educacional y de Salud	7.39287	5
Lo Espejo	Factor 4: Información Educacional y de Salud	3.7261	5
Lo Prado	Factor 4: Información Educacional y de Salud	0	5
Lolol	Factor 4: Información Educacional y de Salud	5.41903	5
Loncoche	Factor 4: Información Educacional y de Salud	3.36783	5
Longaví	Factor 4: Información Educacional y de Salud	1.33435	5
Lonquimay	Factor 4: Información Educacional y de Salud	3.42196	5
Los Álamos	Factor 4: Información Educacional y de Salud	0	5
Los Andes	Factor 4: Información Educacional y de Salud	6.73237	5
Los Ángeles	Factor 4: Información Educacional y de Salud	0	5
Los Lagos	Factor 4: Información Educacional y de Salud	0	5
Los Muermos	Factor 4: Información Educacional y de Salud	5.82794	5
Los Sauces	Factor 4: Información Educacional y de Salud	2.85404	5
Los Vilos	Factor 4: Información Educacional y de Salud	0	5
Lota	Factor 4: Información Educacional y de Salud	0	5
Lumaco	Factor 4: Información Educacional y de Salud	2.85404	5
Machalí	Factor 4: Información Educacional y de Salud	5.82794	5
Macul	Factor 4: Información Educacional y de Salud	0	5
Máfil	Factor 4: Información Educacional y de Salud	0	5
Maipú	Factor 4: Información Educacional y de Salud	0	5
Malloa	Factor 4: Información Educacional y de Salud	5.82794	5
Marchihue	Factor 4: Información Educacional y de Salud	0	5
María Elena	Factor 4: Información Educacional y de Salud	0.690897	5
María Pinto	Factor 4: Información Educacional y de Salud	0	5
Mariquina	Factor 4: Información Educacional y de Salud	2.16737	5
Maule	Factor 4: Información Educacional y de Salud	0	5
Maullín	Factor 4: Información Educacional y de Salud	0	5
Mejillones	Factor 4: Información Educacional y de Salud	0	5
Melipeuco	Factor 4: Información Educacional y de Salud	1.33435	5
Melipilla	Factor 4: Información Educacional y de Salud	0	5
Molina	Factor 4: Información Educacional y de Salud	0	5
Monte Patria	Factor 4: Información Educacional y de Salud	0	5
Mostazal	Factor 4: Información Educacional y de Salud	5.16745	5
Mulchén	Factor 4: Información Educacional y de Salud	0	5
Nacimiento	Factor 4: Información Educacional y de Salud	0	5
Nancagua	Factor 4: Información Educacional y de Salud	0	5
Natales	Factor 4: Información Educacional y de Salud	0	5
Navidad	Factor 4: Información Educacional y de Salud	0	5
Negrete	Factor 4: Información Educacional y de Salud	0	5
Ninhue	Factor 4: Información Educacional y de Salud	0	5
Nogales	Factor 4: Información Educacional y de Salud	2.20218	5
Nueva Imperial	Factor 4: Información Educacional y de Salud	2.81082	5
Ñiquén	Factor 4: Información Educacional y de Salud	0	5
Ñuñoa	Factor 4: Información Educacional y de Salud	0	5
O'Higgins	Factor 4: Información Educacional y de Salud	3.99673	5
Olivar	Factor 4: Información Educacional y de Salud	0	5
Ollagüe	Factor 4: Información Educacional y de Salud	0	5
Olmué	Factor 4: Información Educacional y de Salud	5.46189	5
Osorno	Factor 4: Información Educacional y de Salud	0.797898	5
Ovalle	Factor 4: Información Educacional y de Salud	0	5
Padre Hurtado	Factor 4: Información Educacional y de Salud	1.33435	5
Padre Las Casas	Factor 4: Información Educacional y de Salud	3.8331	5
Paiguano	Factor 4: Información Educacional y de Salud	0	5
Paillaco	Factor 4: Información Educacional y de Salud	2.96527	5
Paine	Factor 4: Información Educacional y de Salud	4.45242	5
Palena	Factor 4: Información Educacional y de Salud	0	5
Palmilla	Factor 4: Información Educacional y de Salud	0	5
Panguipulli	Factor 4: Información Educacional y de Salud	0	5
Panquehue	Factor 4: Información Educacional y de Salud	3.84647	5
Papudo	Factor 4: Información Educacional y de Salud	6.62163	5
Paredones	Factor 4: Información Educacional y de Salud	2.15896	5
Parral	Factor 4: Información Educacional y de Salud	0	5
Pedro Aguirre Cerda	Factor 4: Información Educacional y de Salud	6.40044	5
Pelarco	Factor 4: Información Educacional y de Salud	0	5
Pelluhue	Factor 4: Información Educacional y de Salud	0	5
Pemuco	Factor 4: Información Educacional y de Salud	0	5
Pencahue	Factor 4: Información Educacional y de Salud	0	5
Penco	Factor 4: Información Educacional y de Salud	0	5
Peñaflor	Factor 4: Información Educacional y de Salud	7.85463	5
Peñalolén	Factor 4: Información Educacional y de Salud	6.40044	5
Peralillo	Factor 4: Información Educacional y de Salud	0	5
Perquenco	Factor 4: Información Educacional y de Salud	2.85404	5
Petorca	Factor 4: Información Educacional y de Salud	0.761444	5
Peumo	Factor 4: Información Educacional y de Salud	0	5
Pica	Factor 4: Información Educacional y de Salud	0.715025	5
Pichidegua	Factor 4: Información Educacional y de Salud	1.51551	5
Pichilemu	Factor 4: Información Educacional y de Salud	0	5
Pinto	Factor 4: Información Educacional y de Salud	0	5
Pirque	Factor 4: Información Educacional y de Salud	3.65194	5
Pitrufquén	Factor 4: Información Educacional y de Salud	3.77857	5
Placilla	Factor 4: Información Educacional y de Salud	0	5
Portezuelo	Factor 4: Información Educacional y de Salud	0	5
Porvenir	Factor 4: Información Educacional y de Salud	0	5
Pozo Almonte	Factor 4: Información Educacional y de Salud	0	5
Primavera	Factor 4: Información Educacional y de Salud	5.82794	5
Providencia	Factor 4: Información Educacional y de Salud	7.39287	5
Puchuncaví	Factor 4: Información Educacional y de Salud	2.66635	5
Pucón	Factor 4: Información Educacional y de Salud	5.01065	5
Pudahuel	Factor 4: Información Educacional y de Salud	1.47647	5
Puente Alto	Factor 4: Información Educacional y de Salud	5.16745	5
Puerto Montt	Factor 4: Información Educacional y de Salud	6.82037	5
Puerto Octay	Factor 4: Información Educacional y de Salud	0	5
Puerto Varas	Factor 4: Información Educacional y de Salud	0	5
Pumanque	Factor 4: Información Educacional y de Salud	0	5
Punitaqui	Factor 4: Información Educacional y de Salud	0	5
Punta Arenas	Factor 4: Información Educacional y de Salud	4.11286	5
Puqueldón	Factor 4: Información Educacional y de Salud	0	5
Purén	Factor 4: Información Educacional y de Salud	1.51969	5
Purranque	Factor 4: Información Educacional y de Salud	2.85404	5
Putaendo	Factor 4: Información Educacional y de Salud	4.90365	5
Putre	Factor 4: Información Educacional y de Salud	1.4888	5
Puyehue	Factor 4: Información Educacional y de Salud	3.65194	5
Queilén	Factor 4: Información Educacional y de Salud	0	5
Quellón	Factor 4: Información Educacional y de Salud	0	5
Quemchi	Factor 4: Información Educacional y de Salud	5.82794	5
Quilaco	Factor 4: Información Educacional y de Salud	0	5
Quilicura	Factor 4: Información Educacional y de Salud	7.85463	5
Quilleco	Factor 4: Información Educacional y de Salud	0	5
Quillón	Factor 4: Información Educacional y de Salud	5.06609	5
Quillota	Factor 4: Información Educacional y de Salud	5.16745	5
Quilpué	Factor 4: Información Educacional y de Salud	1.14923	5
Quinchao	Factor 4: Información Educacional y de Salud	0	5
Quinta De Tilcoco	Factor 4: Información Educacional y de Salud	0	5
Quinta Normal	Factor 4: Información Educacional y de Salud	2.86268	5
Quintero	Factor 4: Información Educacional y de Salud	0.690897	5
Quirihue	Factor 4: Información Educacional y de Salud	1.51969	5
Rancagua	Factor 4: Información Educacional y de Salud	0	5
Ránquil	Factor 4: Información Educacional y de Salud	3.55358	5
Rauco	Factor 4: Información Educacional y de Salud	0	5
Recoleta	Factor 4: Información Educacional y de Salud	3.43518	5
Renaico	Factor 4: Información Educacional y de Salud	0	5
Renca	Factor 4: Información Educacional y de Salud	5.82794	5
Rengo	Factor 4: Información Educacional y de Salud	4.29984	5
Requínoa	Factor 4: Información Educacional y de Salud	0	5
Retiro	Factor 4: Información Educacional y de Salud	0.800483	5
Rinconada	Factor 4: Información Educacional y de Salud	2.52894	5
Río Bueno	Factor 4: Información Educacional y de Salud	0	5
Río Claro	Factor 4: Información Educacional y de Salud	0	5
Río Hurtado	Factor 4: Información Educacional y de Salud	0	5
Río Ibáñez	Factor 4: Información Educacional y de Salud	1.33435	5
Río Negro	Factor 4: Información Educacional y de Salud	0.715025	5
Río Verde	Factor 4: Información Educacional y de Salud	2.69724	5
Romeral	Factor 4: Información Educacional y de Salud	0	5
Saavedra	Factor 4: Información Educacional y de Salud	1.47647	5
Sagrada Familia	Factor 4: Información Educacional y de Salud	0	5
Salamanca	Factor 4: Información Educacional y de Salud	0.761444	5
San Antonio	Factor 4: Información Educacional y de Salud	5.62578	5
San Bernardo	Factor 4: Información Educacional y de Salud	0	5
San Carlos	Factor 4: Información Educacional y de Salud	0	5
San Clemente	Factor 4: Información Educacional y de Salud	7.85463	5
San Esteban	Factor 4: Información Educacional y de Salud	4.30825	5
San Fabián	Factor 4: Información Educacional y de Salud	0	5
San Felipe	Factor 4: Información Educacional y de Salud	5.16745	5
San Fernando	Factor 4: Información Educacional y de Salud	0.797898	5
San Gregorio	Factor 4: Información Educacional y de Salud	2.0926	5
San Ignacio	Factor 4: Información Educacional y de Salud	1.51292	5
San Javier	Factor 4: Información Educacional y de Salud	5.70954	5
San Joaquín	Factor 4: Información Educacional y de Salud	2.70146	5
San José De Maipo	Factor 4: Información Educacional y de Salud	0.660497	5
San Juan De La Costa	Factor 4: Información Educacional y de Salud	5.16745	5
San Miguel	Factor 4: Información Educacional y de Salud	0	5
San Nicolás	Factor 4: Información Educacional y de Salud	0	5
San Pablo	Factor 4: Información Educacional y de Salud	0	5
San Pedro	Factor 4: Información Educacional y de Salud	3.55358	5
San Pedro De Atacama	Factor 4: Información Educacional y de Salud	0.797898	5
San Pedro De La Paz	Factor 4: Información Educacional y de Salud	3.4236	5
San Rafael	Factor 4: Información Educacional y de Salud	0.797898	5
San Ramón	Factor 4: Información Educacional y de Salud	5.82794	5
San Rosendo	Factor 4: Información Educacional y de Salud	3.61736	5
San Vicente	Factor 4: Información Educacional y de Salud	0	5
Santa Bárbara	Factor 4: Información Educacional y de Salud	2.31759	5
Santa Cruz	Factor 4: Información Educacional y de Salud	0	5
Santa Juana	Factor 4: Información Educacional y de Salud	0	5
Santa María	Factor 4: Información Educacional y de Salud	4.6866	5
Santiago	Factor 4: Información Educacional y de Salud	6.40044	5
Santo Domingo	Factor 4: Información Educacional y de Salud	3.0352	5
Sierra Gorda	Factor 4: Información Educacional y de Salud	4.98575	5
Talagante	Factor 4: Información Educacional y de Salud	2.89521	5
Talca	Factor 4: Información Educacional y de Salud	3.96112	5
Talcahuano	Factor 4: Información Educacional y de Salud	0.690897	5
Taltal	Factor 4: Información Educacional y de Salud	0	5
Temuco	Factor 4: Información Educacional y de Salud	6.2017	5
Teno	Factor 4: Información Educacional y de Salud	2.20218	5
Teodoro Schmidt	Factor 4: Información Educacional y de Salud	2.85404	5
Tierra Amarilla	Factor 4: Información Educacional y de Salud	0	5
Tiltil	Factor 4: Información Educacional y de Salud	0	5
Timaukel	Factor 4: Información Educacional y de Salud	0	5
Tirúa	Factor 4: Información Educacional y de Salud	0	5
Tocopilla	Factor 4: Información Educacional y de Salud	0	5
Toltén	Factor 4: Información Educacional y de Salud	1.33435	5
Tomé	Factor 4: Información Educacional y de Salud	0	5
Torres Del Paine	Factor 4: Información Educacional y de Salud	0	5
Tortel	Factor 4: Información Educacional y de Salud	0.758246	5
Traiguén	Factor 4: Información Educacional y de Salud	2.89308	5
Treguaco	Factor 4: Información Educacional y de Salud	0	5
Tucapel	Factor 4: Información Educacional y de Salud	1.51551	5
Valdivia	Factor 4: Información Educacional y de Salud	5.64702	5
Vallenar	Factor 4: Información Educacional y de Salud	0	5
Valparaíso	Factor 4: Información Educacional y de Salud	4.24568	5
Vichuquén	Factor 4: Información Educacional y de Salud	2.31341	5
Victoria	Factor 4: Información Educacional y de Salud	2.85404	5
Vicuña	Factor 4: Información Educacional y de Salud	0	5
Vilcún	Factor 4: Información Educacional y de Salud	2.85404	5
Villa Alegre	Factor 4: Información Educacional y de Salud	2.0622	5
Villa Alemana	Factor 4: Información Educacional y de Salud	4.91075	5
Villarrica	Factor 4: Información Educacional y de Salud	3.67865	5
Viña Del Mar	Factor 4: Información Educacional y de Salud	0	5
Vitacura	Factor 4: Información Educacional y de Salud	6.82037	5
Yerbas Buenas	Factor 4: Información Educacional y de Salud	2.04938	5
Yumbel	Factor 4: Información Educacional y de Salud	1.51969	5
Yungay	Factor 4: Información Educacional y de Salud	0	5
Zapallar	Factor 4: Información Educacional y de Salud	5.82794	5
Isla de Maipo	Factor 5: Ley de Lobby	2.54029	7
Algarrobo	Factor 5: Ley de Lobby	5.3497	6
Alhué	Factor 5: Ley de Lobby	5.3497	6
Alto Biobío	Factor 5: Ley de Lobby	5.3497	6
Alto Del Carmen	Factor 5: Ley de Lobby	5.3497	6
Alto Hospicio	Factor 5: Ley de Lobby	0	6
Ancud	Factor 5: Ley de Lobby	5.3497	6
Andacollo	Factor 5: Ley de Lobby	5.3497	6
Angol	Factor 5: Ley de Lobby	5.3497	6
Antofagasta	Factor 5: Ley de Lobby	5.3497	6
Antuco	Factor 5: Ley de Lobby	5.3497	6
Arauco	Factor 5: Ley de Lobby	5.3497	6
Arica	Factor 5: Ley de Lobby	5.3497	6
Aysén	Factor 5: Ley de Lobby	4.62485	6
Buin	Factor 5: Ley de Lobby	5.3497	6
Bulnes	Factor 5: Ley de Lobby	5.3497	6
Cabildo	Factor 5: Ley de Lobby	5.3497	6
Cabo De Hornos	Factor 5: Ley de Lobby	4.62485	6
Cabrero	Factor 5: Ley de Lobby	5.3497	6
Calama	Factor 5: Ley de Lobby	0	6
Calbuco	Factor 5: Ley de Lobby	5.3497	6
Caldera	Factor 5: Ley de Lobby	0.919636	6
Calera	Factor 5: Ley de Lobby	4.62485	6
Calera De Tango	Factor 5: Ley de Lobby	0	6
Calle Larga	Factor 5: Ley de Lobby	3.74812	6
Camarones	Factor 5: Ley de Lobby	5.3497	6
Camiña	Factor 5: Ley de Lobby	0	6
Canela	Factor 5: Ley de Lobby	0	6
Cañete	Factor 5: Ley de Lobby	5.3497	6
Carahue	Factor 5: Ley de Lobby	0	6
Cartagena	Factor 5: Ley de Lobby	4.62485	6
Casablanca	Factor 5: Ley de Lobby	5.3497	6
Castro	Factor 5: Ley de Lobby	5.3497	6
Catemu	Factor 5: Ley de Lobby	4.62485	6
Cauquenes	Factor 5: Ley de Lobby	5.3497	6
Cerrillos	Factor 5: Ley de Lobby	5.3497	6
Cerro Navia	Factor 5: Ley de Lobby	5.3497	6
Chaitén	Factor 5: Ley de Lobby	5.3497	6
Chanco	Factor 5: Ley de Lobby	5.3497	6
Chañaral	Factor 5: Ley de Lobby	0	6
Chépica	Factor 5: Ley de Lobby	5.3497	6
Chiguayante	Factor 5: Ley de Lobby	5.3497	6
Chile Chico	Factor 5: Ley de Lobby	5.3497	6
Chillán	Factor 5: Ley de Lobby	5.3497	6
Chillán Viejo	Factor 5: Ley de Lobby	0	6
Chimbarongo	Factor 5: Ley de Lobby	5.3497	6
Cholchol	Factor 5: Ley de Lobby	4.62485	6
Chonchi	Factor 5: Ley de Lobby	5.3497	6
Cisnes	Factor 5: Ley de Lobby	4.62485	6
Cobquecura	Factor 5: Ley de Lobby	0	6
Cochamó	Factor 5: Ley de Lobby	5.3497	6
Cochrane	Factor 5: Ley de Lobby	3.74812	6
Codegua	Factor 5: Ley de Lobby	5.3497	6
Coelemu	Factor 5: Ley de Lobby	0	6
Coihueco	Factor 5: Ley de Lobby	0	6
Coinco	Factor 5: Ley de Lobby	5.3497	6
Colbún	Factor 5: Ley de Lobby	5.3497	6
Colchane	Factor 5: Ley de Lobby	0	6
Colina	Factor 5: Ley de Lobby	5.3497	6
Collipulli	Factor 5: Ley de Lobby	4.62485	6
Coltauco	Factor 5: Ley de Lobby	5.3497	6
Combarbalá	Factor 5: Ley de Lobby	5.3497	6
Concepción	Factor 5: Ley de Lobby	5.3497	6
Conchalí	Factor 5: Ley de Lobby	5.3497	6
Concón	Factor 5: Ley de Lobby	5.3497	6
Constitución	Factor 5: Ley de Lobby	5.3497	6
Contulmo	Factor 5: Ley de Lobby	5.3497	6
Copiapó	Factor 5: Ley de Lobby	5.3497	6
Coquimbo	Factor 5: Ley de Lobby	5.3497	6
Coronel	Factor 5: Ley de Lobby	5.3497	6
Corral	Factor 5: Ley de Lobby	5.3497	6
Coyhaique	Factor 5: Ley de Lobby	4.62485	6
Cunco	Factor 5: Ley de Lobby	3.74812	6
Curacautín	Factor 5: Ley de Lobby	3.74812	6
Curacaví	Factor 5: Ley de Lobby	5.3497	6
Curaco De Vélez	Factor 5: Ley de Lobby	5.3497	6
Curanilahue	Factor 5: Ley de Lobby	5.3497	6
Curarrehue	Factor 5: Ley de Lobby	4.62485	6
Curepto	Factor 5: Ley de Lobby	5.3497	6
Curicó	Factor 5: Ley de Lobby	5.3497	6
Dalcahue	Factor 5: Ley de Lobby	5.3497	6
Diego De Almagro	Factor 5: Ley de Lobby	5.3497	6
Doñihue	Factor 5: Ley de Lobby	5.3497	6
El Bosque	Factor 5: Ley de Lobby	5.3497	6
El Carmen	Factor 5: Ley de Lobby	5.3497	6
El Monte	Factor 5: Ley de Lobby	5.3497	6
El Quisco	Factor 5: Ley de Lobby	4.62485	6
El Tabo	Factor 5: Ley de Lobby	3.74812	6
Empedrado	Factor 5: Ley de Lobby	0	6
Ercilla	Factor 5: Ley de Lobby	4.62485	6
Estación Central	Factor 5: Ley de Lobby	5.3497	6
Florida	Factor 5: Ley de Lobby	5.3497	6
Freire	Factor 5: Ley de Lobby	4.62485	6
Freirina	Factor 5: Ley de Lobby	5.3497	6
Fresia	Factor 5: Ley de Lobby	5.3497	6
Frutillar	Factor 5: Ley de Lobby	5.3497	6
Futaleufú	Factor 5: Ley de Lobby	5.3497	6
Futrono	Factor 5: Ley de Lobby	5.3497	6
Galvarino	Factor 5: Ley de Lobby	4.62485	6
General Lagos	Factor 5: Ley de Lobby	5.3497	6
Gorbea	Factor 5: Ley de Lobby	4.62485	6
Graneros	Factor 5: Ley de Lobby	5.3497	6
Guaitecas	Factor 5: Ley de Lobby	3.70521	6
Hijuelas	Factor 5: Ley de Lobby	4.62485	6
Hualaihué	Factor 5: Ley de Lobby	5.3497	6
Hualañé	Factor 5: Ley de Lobby	5.3497	6
Hualpén	Factor 5: Ley de Lobby	5.3497	6
Hualqui	Factor 5: Ley de Lobby	5.3497	6
Huara	Factor 5: Ley de Lobby	0	6
Huasco	Factor 5: Ley de Lobby	5.3497	6
Huechuraba	Factor 5: Ley de Lobby	5.3497	6
Illapel	Factor 5: Ley de Lobby	5.3497	6
Independencia	Factor 5: Ley de Lobby	5.3497	6
Iquique	Factor 5: Ley de Lobby	5.3497	6
Juan Fernández	Factor 5: Ley de Lobby	3.74812	6
La Cisterna	Factor 5: Ley de Lobby	5.3497	6
La Cruz	Factor 5: Ley de Lobby	5.3497	6
La Estrella	Factor 5: Ley de Lobby	5.3497	6
La Florida	Factor 5: Ley de Lobby	5.3497	6
La Granja	Factor 5: Ley de Lobby	5.3497	6
La Higuera	Factor 5: Ley de Lobby	5.3497	6
La Ligua	Factor 5: Ley de Lobby	4.62485	6
La Pintana	Factor 5: Ley de Lobby	5.3497	6
La Reina	Factor 5: Ley de Lobby	5.3497	6
La Serena	Factor 5: Ley de Lobby	5.3497	6
La Unión	Factor 5: Ley de Lobby	5.3497	6
Lago Ranco	Factor 5: Ley de Lobby	5.3497	6
Lago Verde	Factor 5: Ley de Lobby	2.61098	6
Laguna Blanca	Factor 5: Ley de Lobby	2.82848	6
Laja	Factor 5: Ley de Lobby	5.3497	6
Lampa	Factor 5: Ley de Lobby	5.3497	6
Lanco	Factor 5: Ley de Lobby	5.3497	6
Las Cabras	Factor 5: Ley de Lobby	0	6
Las Condes	Factor 5: Ley de Lobby	5.3497	6
Lautaro	Factor 5: Ley de Lobby	4.62485	6
Lebu	Factor 5: Ley de Lobby	5.3497	6
Licantén	Factor 5: Ley de Lobby	5.3497	6
Limache	Factor 5: Ley de Lobby	4.62485	6
Linares	Factor 5: Ley de Lobby	5.3497	6
Litueche	Factor 5: Ley de Lobby	5.3497	6
Llaillay	Factor 5: Ley de Lobby	3.74812	6
Llanquihue	Factor 5: Ley de Lobby	5.3497	6
Lo Barnechea	Factor 5: Ley de Lobby	5.3497	6
Lo Espejo	Factor 5: Ley de Lobby	5.3497	6
Lo Prado	Factor 5: Ley de Lobby	5.3497	6
Lolol	Factor 5: Ley de Lobby	5.3497	6
Loncoche	Factor 5: Ley de Lobby	3.74812	6
Longaví	Factor 5: Ley de Lobby	0	6
Lonquimay	Factor 5: Ley de Lobby	4.62485	6
Los Álamos	Factor 5: Ley de Lobby	5.3497	6
Los Andes	Factor 5: Ley de Lobby	4.62485	6
Los Ángeles	Factor 5: Ley de Lobby	5.3497	6
Los Lagos	Factor 5: Ley de Lobby	5.3497	6
Los Muermos	Factor 5: Ley de Lobby	5.3497	6
Los Sauces	Factor 5: Ley de Lobby	4.62485	6
Los Vilos	Factor 5: Ley de Lobby	5.3497	6
Lota	Factor 5: Ley de Lobby	5.3497	6
Lumaco	Factor 5: Ley de Lobby	2.76285	6
Machalí	Factor 5: Ley de Lobby	0	6
Macul	Factor 5: Ley de Lobby	5.3497	6
Máfil	Factor 5: Ley de Lobby	5.3497	6
Maipú	Factor 5: Ley de Lobby	5.3497	6
Malloa	Factor 5: Ley de Lobby	5.3497	6
Marchihue	Factor 5: Ley de Lobby	5.3497	6
María Elena	Factor 5: Ley de Lobby	5.3497	6
María Pinto	Factor 5: Ley de Lobby	5.3497	6
Mariquina	Factor 5: Ley de Lobby	0	6
Maule	Factor 5: Ley de Lobby	5.3497	6
Maullín	Factor 5: Ley de Lobby	5.3497	6
Mejillones	Factor 5: Ley de Lobby	0	6
Melipeuco	Factor 5: Ley de Lobby	4.62485	6
Melipilla	Factor 5: Ley de Lobby	5.3497	6
Molina	Factor 5: Ley de Lobby	5.3497	6
Monte Patria	Factor 5: Ley de Lobby	5.3497	6
Mostazal	Factor 5: Ley de Lobby	5.3497	6
Mulchén	Factor 5: Ley de Lobby	5.3497	6
Nacimiento	Factor 5: Ley de Lobby	5.3497	6
Nancagua	Factor 5: Ley de Lobby	5.3497	6
Natales	Factor 5: Ley de Lobby	5.3497	6
Navidad	Factor 5: Ley de Lobby	5.3497	6
Negrete	Factor 5: Ley de Lobby	5.3497	6
Ninhue	Factor 5: Ley de Lobby	0	6
Nogales	Factor 5: Ley de Lobby	4.62485	6
Nueva Imperial	Factor 5: Ley de Lobby	4.62485	6
Ñiquén	Factor 5: Ley de Lobby	0	6
Ñuñoa	Factor 5: Ley de Lobby	0	6
O'Higgins	Factor 5: Ley de Lobby	4.62485	6
Olivar	Factor 5: Ley de Lobby	5.3497	6
Ollagüe	Factor 5: Ley de Lobby	0	6
Olmué	Factor 5: Ley de Lobby	4.62485	6
Osorno	Factor 5: Ley de Lobby	5.3497	6
Ovalle	Factor 5: Ley de Lobby	5.3497	6
Padre Hurtado	Factor 5: Ley de Lobby	5.3497	6
Padre Las Casas	Factor 5: Ley de Lobby	4.62485	6
Paiguano	Factor 5: Ley de Lobby	5.3497	6
Paillaco	Factor 5: Ley de Lobby	5.3497	6
Paine	Factor 5: Ley de Lobby	5.3497	6
Palena	Factor 5: Ley de Lobby	5.3497	6
Palmilla	Factor 5: Ley de Lobby	5.3497	6
Panguipulli	Factor 5: Ley de Lobby	5.3497	6
Panquehue	Factor 5: Ley de Lobby	4.62485	6
Papudo	Factor 5: Ley de Lobby	3.74812	6
Paredones	Factor 5: Ley de Lobby	5.3497	6
Parral	Factor 5: Ley de Lobby	5.3497	6
Pedro Aguirre Cerda	Factor 5: Ley de Lobby	5.3497	6
Pelarco	Factor 5: Ley de Lobby	5.3497	6
Pelluhue	Factor 5: Ley de Lobby	5.3497	6
Pemuco	Factor 5: Ley de Lobby	5.3497	6
Pencahue	Factor 5: Ley de Lobby	0	6
Penco	Factor 5: Ley de Lobby	5.3497	6
Peñaflor	Factor 5: Ley de Lobby	5.3497	6
Peñalolén	Factor 5: Ley de Lobby	5.3497	6
Peralillo	Factor 5: Ley de Lobby	0	6
Perquenco	Factor 5: Ley de Lobby	3.74812	6
Petorca	Factor 5: Ley de Lobby	4.62485	6
Peumo	Factor 5: Ley de Lobby	0	6
Pica	Factor 5: Ley de Lobby	5.3497	6
Pichidegua	Factor 5: Ley de Lobby	0	6
Pichilemu	Factor 5: Ley de Lobby	5.3497	6
Pinto	Factor 5: Ley de Lobby	5.3497	6
Pirque	Factor 5: Ley de Lobby	5.3497	6
Pitrufquén	Factor 5: Ley de Lobby	5.3497	6
Placilla	Factor 5: Ley de Lobby	5.3497	6
Portezuelo	Factor 5: Ley de Lobby	0	6
Porvenir	Factor 5: Ley de Lobby	5.3497	6
Pozo Almonte	Factor 5: Ley de Lobby	5.3497	6
Primavera	Factor 5: Ley de Lobby	5.3497	6
Providencia	Factor 5: Ley de Lobby	0	6
Puchuncaví	Factor 5: Ley de Lobby	4.62485	6
Pucón	Factor 5: Ley de Lobby	4.62485	6
Pudahuel	Factor 5: Ley de Lobby	5.3497	6
Puente Alto	Factor 5: Ley de Lobby	5.3497	6
Puerto Montt	Factor 5: Ley de Lobby	5.3497	6
Puerto Octay	Factor 5: Ley de Lobby	5.3497	6
Puerto Varas	Factor 5: Ley de Lobby	5.3497	6
Pumanque	Factor 5: Ley de Lobby	5.3497	6
Punitaqui	Factor 5: Ley de Lobby	5.3497	6
Punta Arenas	Factor 5: Ley de Lobby	4.62485	6
Puqueldón	Factor 5: Ley de Lobby	5.3497	6
Purén	Factor 5: Ley de Lobby	4.62485	6
Purranque	Factor 5: Ley de Lobby	5.3497	6
Putaendo	Factor 5: Ley de Lobby	5.3497	6
Putre	Factor 5: Ley de Lobby	2.61098	6
Puyehue	Factor 5: Ley de Lobby	5.3497	6
Queilén	Factor 5: Ley de Lobby	5.3497	6
Quellón	Factor 5: Ley de Lobby	5.3497	6
Quemchi	Factor 5: Ley de Lobby	5.3497	6
Quilaco	Factor 5: Ley de Lobby	5.3497	6
Quilicura	Factor 5: Ley de Lobby	5.3497	6
Quilleco	Factor 5: Ley de Lobby	5.3497	6
Quillón	Factor 5: Ley de Lobby	5.3497	6
Quillota	Factor 5: Ley de Lobby	4.62485	6
Quilpué	Factor 5: Ley de Lobby	4.62485	6
Quinchao	Factor 5: Ley de Lobby	5.3497	6
Quinta De Tilcoco	Factor 5: Ley de Lobby	0	6
Quinta Normal	Factor 5: Ley de Lobby	0	6
Quintero	Factor 5: Ley de Lobby	3.74812	6
Quirihue	Factor 5: Ley de Lobby	5.3497	6
Rancagua	Factor 5: Ley de Lobby	5.3497	6
Ránquil	Factor 5: Ley de Lobby	5.3497	6
Rauco	Factor 5: Ley de Lobby	5.3497	6
Recoleta	Factor 5: Ley de Lobby	0	6
Renaico	Factor 5: Ley de Lobby	4.62485	6
Renca	Factor 5: Ley de Lobby	5.3497	6
Rengo	Factor 5: Ley de Lobby	5.3497	6
Requínoa	Factor 5: Ley de Lobby	0	6
Retiro	Factor 5: Ley de Lobby	5.3497	6
Rinconada	Factor 5: Ley de Lobby	4.62485	6
Río Bueno	Factor 5: Ley de Lobby	5.3497	6
Río Claro	Factor 5: Ley de Lobby	5.3497	6
Río Hurtado	Factor 5: Ley de Lobby	0	6
Río Ibáñez	Factor 5: Ley de Lobby	3.74812	6
Río Negro	Factor 5: Ley de Lobby	5.3497	6
Río Verde	Factor 5: Ley de Lobby	4.62485	6
Romeral	Factor 5: Ley de Lobby	5.3497	6
Saavedra	Factor 5: Ley de Lobby	4.62485	6
Sagrada Familia	Factor 5: Ley de Lobby	5.3497	6
Salamanca	Factor 5: Ley de Lobby	5.3497	6
San Antonio	Factor 5: Ley de Lobby	4.62485	6
San Bernardo	Factor 5: Ley de Lobby	5.3497	6
San Carlos	Factor 5: Ley de Lobby	0	6
San Clemente	Factor 5: Ley de Lobby	5.3497	6
San Esteban	Factor 5: Ley de Lobby	4.62485	6
San Fabián	Factor 5: Ley de Lobby	5.3497	6
San Felipe	Factor 5: Ley de Lobby	4.62485	6
San Fernando	Factor 5: Ley de Lobby	5.3497	6
San Gregorio	Factor 5: Ley de Lobby	4.62485	6
San Ignacio	Factor 5: Ley de Lobby	5.3497	6
San Javier	Factor 5: Ley de Lobby	5.3497	6
San Joaquín	Factor 5: Ley de Lobby	5.3497	6
San José De Maipo	Factor 5: Ley de Lobby	5.3497	6
San Juan De La Costa	Factor 5: Ley de Lobby	5.3497	6
San Miguel	Factor 5: Ley de Lobby	5.3497	6
San Nicolás	Factor 5: Ley de Lobby	5.3497	6
San Pablo	Factor 5: Ley de Lobby	5.3497	6
San Pedro	Factor 5: Ley de Lobby	5.3497	6
San Pedro De Atacama	Factor 5: Ley de Lobby	5.3497	6
San Pedro De La Paz	Factor 5: Ley de Lobby	0.919636	6
San Rafael	Factor 5: Ley de Lobby	5.3497	6
San Ramón	Factor 5: Ley de Lobby	0	6
San Rosendo	Factor 5: Ley de Lobby	0	6
San Vicente	Factor 5: Ley de Lobby	0	6
Santa Bárbara	Factor 5: Ley de Lobby	5.3497	6
Santa Cruz	Factor 5: Ley de Lobby	0	6
Santa Juana	Factor 5: Ley de Lobby	0.919636	6
Santa María	Factor 5: Ley de Lobby	4.62485	6
Santiago	Factor 5: Ley de Lobby	5.3497	6
Santo Domingo	Factor 5: Ley de Lobby	3.52533	6
Sierra Gorda	Factor 5: Ley de Lobby	5.3497	6
Talagante	Factor 5: Ley de Lobby	5.3497	6
Talca	Factor 5: Ley de Lobby	5.3497	6
Talcahuano	Factor 5: Ley de Lobby	5.3497	6
Taltal	Factor 5: Ley de Lobby	0	6
Temuco	Factor 5: Ley de Lobby	0	6
Teno	Factor 5: Ley de Lobby	5.3497	6
Teodoro Schmidt	Factor 5: Ley de Lobby	4.62485	6
Tierra Amarilla	Factor 5: Ley de Lobby	5.3497	6
Tiltil	Factor 5: Ley de Lobby	5.3497	6
Timaukel	Factor 5: Ley de Lobby	5.3497	6
Tirúa	Factor 5: Ley de Lobby	5.3497	6
Tocopilla	Factor 5: Ley de Lobby	5.3497	6
Toltén	Factor 5: Ley de Lobby	4.62485	6
Tomé	Factor 5: Ley de Lobby	0	6
Torres Del Paine	Factor 5: Ley de Lobby	5.3497	6
Tortel	Factor 5: Ley de Lobby	1.88613	6
Traiguén	Factor 5: Ley de Lobby	4.62485	6
Treguaco	Factor 5: Ley de Lobby	0	6
Tucapel	Factor 5: Ley de Lobby	5.3497	6
Valdivia	Factor 5: Ley de Lobby	5.3497	6
Vallenar	Factor 5: Ley de Lobby	5.3497	6
Valparaíso	Factor 5: Ley de Lobby	5.3497	6
Vichuquén	Factor 5: Ley de Lobby	5.3497	6
Victoria	Factor 5: Ley de Lobby	5.3497	6
Vicuña	Factor 5: Ley de Lobby	5.3497	6
Vilcún	Factor 5: Ley de Lobby	4.62485	6
Villa Alegre	Factor 5: Ley de Lobby	5.3497	6
Villa Alemana	Factor 5: Ley de Lobby	0	6
Villarrica	Factor 5: Ley de Lobby	4.62485	6
Viña Del Mar	Factor 5: Ley de Lobby	4.62485	6
Vitacura	Factor 5: Ley de Lobby	5.3497	6
Yerbas Buenas	Factor 5: Ley de Lobby	5.3497	6
Yumbel	Factor 5: Ley de Lobby	5.3497	6
Yungay	Factor 5: Ley de Lobby	5.3497	6
Zapallar	Factor 5: Ley de Lobby	4.62485	6
Isla de Maipo	Factor 6: Concejo Comunal de Organizaciones de la Sociedad Civil (COSOC)	2.54029	7
Algarrobo	Factor 6: Concejo Comunal de Organizaciones de la Sociedad Civil (COSOC)	2.20199	7
Alhué	Factor 6: Concejo Comunal de Organizaciones de la Sociedad Civil (COSOC)	0	7
Alto Biobío	Factor 6: Concejo Comunal de Organizaciones de la Sociedad Civil (COSOC)	0	7
Alto Del Carmen	Factor 6: Concejo Comunal de Organizaciones de la Sociedad Civil (COSOC)	0	7
Alto Hospicio	Factor 6: Concejo Comunal de Organizaciones de la Sociedad Civil (COSOC)	0.83432	7
Ancud	Factor 6: Concejo Comunal de Organizaciones de la Sociedad Civil (COSOC)	0.500356	7
Andacollo	Factor 6: Concejo Comunal de Organizaciones de la Sociedad Civil (COSOC)	0.500356	7
Angol	Factor 6: Concejo Comunal de Organizaciones de la Sociedad Civil (COSOC)	3.85948	7
Antofagasta	Factor 6: Concejo Comunal de Organizaciones de la Sociedad Civil (COSOC)	4.6938	7
Antuco	Factor 6: Concejo Comunal de Organizaciones de la Sociedad Civil (COSOC)	4.6938	7
Arauco	Factor 6: Concejo Comunal de Organizaciones de la Sociedad Civil (COSOC)	4.6938	7
Arica	Factor 6: Concejo Comunal de Organizaciones de la Sociedad Civil (COSOC)	1.33116	7
Aysén	Factor 6: Concejo Comunal de Organizaciones de la Sociedad Civil (COSOC)	3.85948	7
Buin	Factor 6: Concejo Comunal de Organizaciones de la Sociedad Civil (COSOC)	0.500356	7
Bulnes	Factor 6: Concejo Comunal de Organizaciones de la Sociedad Civil (COSOC)	0	7
Cabildo	Factor 6: Concejo Comunal de Organizaciones de la Sociedad Civil (COSOC)	1.32705	7
Cabo De Hornos	Factor 6: Concejo Comunal de Organizaciones de la Sociedad Civil (COSOC)	2.15762	7
Cabrero	Factor 6: Concejo Comunal de Organizaciones de la Sociedad Civil (COSOC)	0	7
Calama	Factor 6: Concejo Comunal de Organizaciones de la Sociedad Civil (COSOC)	0	7
Calbuco	Factor 6: Concejo Comunal de Organizaciones de la Sociedad Civil (COSOC)	0	7
Caldera	Factor 6: Concejo Comunal de Organizaciones de la Sociedad Civil (COSOC)	4.6938	7
Calera	Factor 6: Concejo Comunal de Organizaciones de la Sociedad Civil (COSOC)	3.863	7
Calera De Tango	Factor 6: Concejo Comunal de Organizaciones de la Sociedad Civil (COSOC)	0	7
Calle Larga	Factor 6: Concejo Comunal de Organizaciones de la Sociedad Civil (COSOC)	0.500356	7
Camarones	Factor 6: Concejo Comunal de Organizaciones de la Sociedad Civil (COSOC)	2.16548	7
Camiña	Factor 6: Concejo Comunal de Organizaciones de la Sociedad Civil (COSOC)	0	7
Canela	Factor 6: Concejo Comunal de Organizaciones de la Sociedad Civil (COSOC)	0	7
Cañete	Factor 6: Concejo Comunal de Organizaciones de la Sociedad Civil (COSOC)	0.500356	7
Carahue	Factor 6: Concejo Comunal de Organizaciones de la Sociedad Civil (COSOC)	2.52833	7
Cartagena	Factor 6: Concejo Comunal de Organizaciones de la Sociedad Civil (COSOC)	2.15785	7
Casablanca	Factor 6: Concejo Comunal de Organizaciones de la Sociedad Civil (COSOC)	2.20984	7
Castro	Factor 6: Concejo Comunal de Organizaciones de la Sociedad Civil (COSOC)	0	7
Catemu	Factor 6: Concejo Comunal de Organizaciones de la Sociedad Civil (COSOC)	0.500356	7
Cauquenes	Factor 6: Concejo Comunal de Organizaciones de la Sociedad Civil (COSOC)	0	7
Cerrillos	Factor 6: Concejo Comunal de Organizaciones de la Sociedad Civil (COSOC)	4.6938	7
Cerro Navia	Factor 6: Concejo Comunal de Organizaciones de la Sociedad Civil (COSOC)	0.500356	7
Chaitén	Factor 6: Concejo Comunal de Organizaciones de la Sociedad Civil (COSOC)	0	7
Chanco	Factor 6: Concejo Comunal de Organizaciones de la Sociedad Civil (COSOC)	0	7
Chañaral	Factor 6: Concejo Comunal de Organizaciones de la Sociedad Civil (COSOC)	0.500356	7
Chépica	Factor 6: Concejo Comunal de Organizaciones de la Sociedad Civil (COSOC)	0.500356	7
Chiguayante	Factor 6: Concejo Comunal de Organizaciones de la Sociedad Civil (COSOC)	0.500356	7
Chile Chico	Factor 6: Concejo Comunal de Organizaciones de la Sociedad Civil (COSOC)	0	7
Chillán	Factor 6: Concejo Comunal de Organizaciones de la Sociedad Civil (COSOC)	0	7
Chillán Viejo	Factor 6: Concejo Comunal de Organizaciones de la Sociedad Civil (COSOC)	0	7
Chimbarongo	Factor 6: Concejo Comunal de Organizaciones de la Sociedad Civil (COSOC)	0	7
Cholchol	Factor 6: Concejo Comunal de Organizaciones de la Sociedad Civil (COSOC)	3.02868	7
Chonchi	Factor 6: Concejo Comunal de Organizaciones de la Sociedad Civil (COSOC)	0	7
Cisnes	Factor 6: Concejo Comunal de Organizaciones de la Sociedad Civil (COSOC)	1.33116	7
Cobquecura	Factor 6: Concejo Comunal de Organizaciones de la Sociedad Civil (COSOC)	4.6938	7
Cochamó	Factor 6: Concejo Comunal de Organizaciones de la Sociedad Civil (COSOC)	0	7
Cochrane	Factor 6: Concejo Comunal de Organizaciones de la Sociedad Civil (COSOC)	2.15762	7
Codegua	Factor 6: Concejo Comunal de Organizaciones de la Sociedad Civil (COSOC)	0.500356	7
Coelemu	Factor 6: Concejo Comunal de Organizaciones de la Sociedad Civil (COSOC)	0	7
Coihueco	Factor 6: Concejo Comunal de Organizaciones de la Sociedad Civil (COSOC)	0	7
Coinco	Factor 6: Concejo Comunal de Organizaciones de la Sociedad Civil (COSOC)	0.500356	7
Colbún	Factor 6: Concejo Comunal de Organizaciones de la Sociedad Civil (COSOC)	0.500356	7
Colchane	Factor 6: Concejo Comunal de Organizaciones de la Sociedad Civil (COSOC)	0	7
Colina	Factor 6: Concejo Comunal de Organizaciones de la Sociedad Civil (COSOC)	0	7
Collipulli	Factor 6: Concejo Comunal de Organizaciones de la Sociedad Civil (COSOC)	2.15785	7
Coltauco	Factor 6: Concejo Comunal de Organizaciones de la Sociedad Civil (COSOC)	0	7
Combarbalá	Factor 6: Concejo Comunal de Organizaciones de la Sociedad Civil (COSOC)	0	7
Concepción	Factor 6: Concejo Comunal de Organizaciones de la Sociedad Civil (COSOC)	0.500356	7
Conchalí	Factor 6: Concejo Comunal de Organizaciones de la Sociedad Civil (COSOC)	0.500356	7
Concón	Factor 6: Concejo Comunal de Organizaciones de la Sociedad Civil (COSOC)	0.826696	7
Constitución	Factor 6: Concejo Comunal de Organizaciones de la Sociedad Civil (COSOC)	0	7
Contulmo	Factor 6: Concejo Comunal de Organizaciones de la Sociedad Civil (COSOC)	0	7
Copiapó	Factor 6: Concejo Comunal de Organizaciones de la Sociedad Civil (COSOC)	0.500356	7
Coquimbo	Factor 6: Concejo Comunal de Organizaciones de la Sociedad Civil (COSOC)	0.500356	7
Coronel	Factor 6: Concejo Comunal de Organizaciones de la Sociedad Civil (COSOC)	0.500356	7
Corral	Factor 6: Concejo Comunal de Organizaciones de la Sociedad Civil (COSOC)	0.500356	7
Coyhaique	Factor 6: Concejo Comunal de Organizaciones de la Sociedad Civil (COSOC)	2.98432	7
Cunco	Factor 6: Concejo Comunal de Organizaciones de la Sociedad Civil (COSOC)	0.500356	7
Curacautín	Factor 6: Concejo Comunal de Organizaciones de la Sociedad Civil (COSOC)	2.15762	7
Curacaví	Factor 6: Concejo Comunal de Organizaciones de la Sociedad Civil (COSOC)	4.6938	7
Curaco De Vélez	Factor 6: Concejo Comunal de Organizaciones de la Sociedad Civil (COSOC)	0	7
Curanilahue	Factor 6: Concejo Comunal de Organizaciones de la Sociedad Civil (COSOC)	0.500356	7
Curarrehue	Factor 6: Concejo Comunal de Organizaciones de la Sociedad Civil (COSOC)	2.15352	7
Curepto	Factor 6: Concejo Comunal de Organizaciones de la Sociedad Civil (COSOC)	0	7
Curicó	Factor 6: Concejo Comunal de Organizaciones de la Sociedad Civil (COSOC)	0.500356	7
Dalcahue	Factor 6: Concejo Comunal de Organizaciones de la Sociedad Civil (COSOC)	0.500356	7
Diego De Almagro	Factor 6: Concejo Comunal de Organizaciones de la Sociedad Civil (COSOC)	0	7
Doñihue	Factor 6: Concejo Comunal de Organizaciones de la Sociedad Civil (COSOC)	0	7
El Bosque	Factor 6: Concejo Comunal de Organizaciones de la Sociedad Civil (COSOC)	0.500356	7
El Carmen	Factor 6: Concejo Comunal de Organizaciones de la Sociedad Civil (COSOC)	0	7
El Monte	Factor 6: Concejo Comunal de Organizaciones de la Sociedad Civil (COSOC)	0.500356	7
El Quisco	Factor 6: Concejo Comunal de Organizaciones de la Sociedad Civil (COSOC)	3.85948	7
El Tabo	Factor 6: Concejo Comunal de Organizaciones de la Sociedad Civil (COSOC)	0.500356	7
Empedrado	Factor 6: Concejo Comunal de Organizaciones de la Sociedad Civil (COSOC)	0	7
Ercilla	Factor 6: Concejo Comunal de Organizaciones de la Sociedad Civil (COSOC)	2.15762	7
Estación Central	Factor 6: Concejo Comunal de Organizaciones de la Sociedad Civil (COSOC)	0.500356	7
Florida	Factor 6: Concejo Comunal de Organizaciones de la Sociedad Civil (COSOC)	0.500356	7
Freire	Factor 6: Concejo Comunal de Organizaciones de la Sociedad Civil (COSOC)	2.20199	7
Freirina	Factor 6: Concejo Comunal de Organizaciones de la Sociedad Civil (COSOC)	0	7
Fresia	Factor 6: Concejo Comunal de Organizaciones de la Sociedad Civil (COSOC)	4.6938	7
Frutillar	Factor 6: Concejo Comunal de Organizaciones de la Sociedad Civil (COSOC)	0.500356	7
Futaleufú	Factor 6: Concejo Comunal de Organizaciones de la Sociedad Civil (COSOC)	4.6938	7
Futrono	Factor 6: Concejo Comunal de Organizaciones de la Sociedad Civil (COSOC)	4.6938	7
Galvarino	Factor 6: Concejo Comunal de Organizaciones de la Sociedad Civil (COSOC)	2.15352	7
General Lagos	Factor 6: Concejo Comunal de Organizaciones de la Sociedad Civil (COSOC)	0.500356	7
Gorbea	Factor 6: Concejo Comunal de Organizaciones de la Sociedad Civil (COSOC)	3.02868	7
Graneros	Factor 6: Concejo Comunal de Organizaciones de la Sociedad Civil (COSOC)	0	7
Guaitecas	Factor 6: Concejo Comunal de Organizaciones de la Sociedad Civil (COSOC)	2.15785	7
Hijuelas	Factor 6: Concejo Comunal de Organizaciones de la Sociedad Civil (COSOC)	0.500356	7
Hualaihué	Factor 6: Concejo Comunal de Organizaciones de la Sociedad Civil (COSOC)	0	7
Hualañé	Factor 6: Concejo Comunal de Organizaciones de la Sociedad Civil (COSOC)	0	7
Hualpén	Factor 6: Concejo Comunal de Organizaciones de la Sociedad Civil (COSOC)	0	7
Hualqui	Factor 6: Concejo Comunal de Organizaciones de la Sociedad Civil (COSOC)	0.500356	7
Huara	Factor 6: Concejo Comunal de Organizaciones de la Sociedad Civil (COSOC)	0	7
Huasco	Factor 6: Concejo Comunal de Organizaciones de la Sociedad Civil (COSOC)	0.500356	7
Huechuraba	Factor 6: Concejo Comunal de Organizaciones de la Sociedad Civil (COSOC)	4.6938	7
Illapel	Factor 6: Concejo Comunal de Organizaciones de la Sociedad Civil (COSOC)	0	7
Independencia	Factor 6: Concejo Comunal de Organizaciones de la Sociedad Civil (COSOC)	0.500356	7
Iquique	Factor 6: Concejo Comunal de Organizaciones de la Sociedad Civil (COSOC)	2.99194	7
Juan Fernández	Factor 6: Concejo Comunal de Organizaciones de la Sociedad Civil (COSOC)	0	7
La Cisterna	Factor 6: Concejo Comunal de Organizaciones de la Sociedad Civil (COSOC)	0.500356	7
La Cruz	Factor 6: Concejo Comunal de Organizaciones de la Sociedad Civil (COSOC)	2.98432	7
La Estrella	Factor 6: Concejo Comunal de Organizaciones de la Sociedad Civil (COSOC)	0.500356	7
La Florida	Factor 6: Concejo Comunal de Organizaciones de la Sociedad Civil (COSOC)	0.500356	7
La Granja	Factor 6: Concejo Comunal de Organizaciones de la Sociedad Civil (COSOC)	0	7
La Higuera	Factor 6: Concejo Comunal de Organizaciones de la Sociedad Civil (COSOC)	0	7
La Ligua	Factor 6: Concejo Comunal de Organizaciones de la Sociedad Civil (COSOC)	2.15762	7
La Pintana	Factor 6: Concejo Comunal de Organizaciones de la Sociedad Civil (COSOC)	0.500356	7
La Reina	Factor 6: Concejo Comunal de Organizaciones de la Sociedad Civil (COSOC)	4.6938	7
La Serena	Factor 6: Concejo Comunal de Organizaciones de la Sociedad Civil (COSOC)	0	7
La Unión	Factor 6: Concejo Comunal de Organizaciones de la Sociedad Civil (COSOC)	0.500356	7
Lago Ranco	Factor 6: Concejo Comunal de Organizaciones de la Sociedad Civil (COSOC)	0	7
Lago Verde	Factor 6: Concejo Comunal de Organizaciones de la Sociedad Civil (COSOC)	0.500356	7
Laguna Blanca	Factor 6: Concejo Comunal de Organizaciones de la Sociedad Civil (COSOC)	2.15762	7
Laja	Factor 6: Concejo Comunal de Organizaciones de la Sociedad Civil (COSOC)	0	7
Lampa	Factor 6: Concejo Comunal de Organizaciones de la Sociedad Civil (COSOC)	0.500356	7
Lanco	Factor 6: Concejo Comunal de Organizaciones de la Sociedad Civil (COSOC)	0	7
Las Cabras	Factor 6: Concejo Comunal de Organizaciones de la Sociedad Civil (COSOC)	0	7
Las Condes	Factor 6: Concejo Comunal de Organizaciones de la Sociedad Civil (COSOC)	4.6938	7
Lautaro	Factor 6: Concejo Comunal de Organizaciones de la Sociedad Civil (COSOC)	1.32705	7
Lebu	Factor 6: Concejo Comunal de Organizaciones de la Sociedad Civil (COSOC)	0	7
Licantén	Factor 6: Concejo Comunal de Organizaciones de la Sociedad Civil (COSOC)	0.500356	7
Limache	Factor 6: Concejo Comunal de Organizaciones de la Sociedad Civil (COSOC)	2.15785	7
Linares	Factor 6: Concejo Comunal de Organizaciones de la Sociedad Civil (COSOC)	0	7
Litueche	Factor 6: Concejo Comunal de Organizaciones de la Sociedad Civil (COSOC)	4.6938	7
Llaillay	Factor 6: Concejo Comunal de Organizaciones de la Sociedad Civil (COSOC)	2.15762	7
Llanquihue	Factor 6: Concejo Comunal de Organizaciones de la Sociedad Civil (COSOC)	0.500356	7
Lo Barnechea	Factor 6: Concejo Comunal de Organizaciones de la Sociedad Civil (COSOC)	4.6938	7
Lo Espejo	Factor 6: Concejo Comunal de Organizaciones de la Sociedad Civil (COSOC)	0	7
Lo Prado	Factor 6: Concejo Comunal de Organizaciones de la Sociedad Civil (COSOC)	4.6938	7
Lolol	Factor 6: Concejo Comunal de Organizaciones de la Sociedad Civil (COSOC)	0	7
Loncoche	Factor 6: Concejo Comunal de Organizaciones de la Sociedad Civil (COSOC)	3.03631	7
Longaví	Factor 6: Concejo Comunal de Organizaciones de la Sociedad Civil (COSOC)	0	7
Lonquimay	Factor 6: Concejo Comunal de Organizaciones de la Sociedad Civil (COSOC)	2.98432	7
Los Álamos	Factor 6: Concejo Comunal de Organizaciones de la Sociedad Civil (COSOC)	2.49182	7
Los Andes	Factor 6: Concejo Comunal de Organizaciones de la Sociedad Civil (COSOC)	2.15785	7
Los Ángeles	Factor 6: Concejo Comunal de Organizaciones de la Sociedad Civil (COSOC)	4.6938	7
Los Lagos	Factor 6: Concejo Comunal de Organizaciones de la Sociedad Civil (COSOC)	0	7
Los Muermos	Factor 6: Concejo Comunal de Organizaciones de la Sociedad Civil (COSOC)	0.500356	7
Los Sauces	Factor 6: Concejo Comunal de Organizaciones de la Sociedad Civil (COSOC)	2.15762	7
Los Vilos	Factor 6: Concejo Comunal de Organizaciones de la Sociedad Civil (COSOC)	0	7
Lota	Factor 6: Concejo Comunal de Organizaciones de la Sociedad Civil (COSOC)	0	7
Lumaco	Factor 6: Concejo Comunal de Organizaciones de la Sociedad Civil (COSOC)	3.85948	7
Machalí	Factor 6: Concejo Comunal de Organizaciones de la Sociedad Civil (COSOC)	4.6938	7
Macul	Factor 6: Concejo Comunal de Organizaciones de la Sociedad Civil (COSOC)	4.6938	7
Máfil	Factor 6: Concejo Comunal de Organizaciones de la Sociedad Civil (COSOC)	0	7
Maipú	Factor 6: Concejo Comunal de Organizaciones de la Sociedad Civil (COSOC)	0.500356	7
Malloa	Factor 6: Concejo Comunal de Organizaciones de la Sociedad Civil (COSOC)	0.500356	7
Marchihue	Factor 6: Concejo Comunal de Organizaciones de la Sociedad Civil (COSOC)	0.500356	7
María Elena	Factor 6: Concejo Comunal de Organizaciones de la Sociedad Civil (COSOC)	0	7
María Pinto	Factor 6: Concejo Comunal de Organizaciones de la Sociedad Civil (COSOC)	4.6938	7
Mariquina	Factor 6: Concejo Comunal de Organizaciones de la Sociedad Civil (COSOC)	0	7
Maule	Factor 6: Concejo Comunal de Organizaciones de la Sociedad Civil (COSOC)	0	7
Maullín	Factor 6: Concejo Comunal de Organizaciones de la Sociedad Civil (COSOC)	0	7
Mejillones	Factor 6: Concejo Comunal de Organizaciones de la Sociedad Civil (COSOC)	0.500356	7
Melipeuco	Factor 6: Concejo Comunal de Organizaciones de la Sociedad Civil (COSOC)	2.15352	7
Melipilla	Factor 6: Concejo Comunal de Organizaciones de la Sociedad Civil (COSOC)	0.500356	7
Molina	Factor 6: Concejo Comunal de Organizaciones de la Sociedad Civil (COSOC)	0.500356	7
Monte Patria	Factor 6: Concejo Comunal de Organizaciones de la Sociedad Civil (COSOC)	0	7
Mostazal	Factor 6: Concejo Comunal de Organizaciones de la Sociedad Civil (COSOC)	0	7
Mulchén	Factor 6: Concejo Comunal de Organizaciones de la Sociedad Civil (COSOC)	0.500356	7
Nacimiento	Factor 6: Concejo Comunal de Organizaciones de la Sociedad Civil (COSOC)	0.500356	7
Nancagua	Factor 6: Concejo Comunal de Organizaciones de la Sociedad Civil (COSOC)	0	7
Natales	Factor 6: Concejo Comunal de Organizaciones de la Sociedad Civil (COSOC)	0	7
Navidad	Factor 6: Concejo Comunal de Organizaciones de la Sociedad Civil (COSOC)	0.500356	7
Negrete	Factor 6: Concejo Comunal de Organizaciones de la Sociedad Civil (COSOC)	0	7
Ninhue	Factor 6: Concejo Comunal de Organizaciones de la Sociedad Civil (COSOC)	0	7
Nogales	Factor 6: Concejo Comunal de Organizaciones de la Sociedad Civil (COSOC)	2.15762	7
Nueva Imperial	Factor 6: Concejo Comunal de Organizaciones de la Sociedad Civil (COSOC)	2.15762	7
Ñiquén	Factor 6: Concejo Comunal de Organizaciones de la Sociedad Civil (COSOC)	4.19345	7
Ñuñoa	Factor 6: Concejo Comunal de Organizaciones de la Sociedad Civil (COSOC)	0.500356	7
O'Higgins	Factor 6: Concejo Comunal de Organizaciones de la Sociedad Civil (COSOC)	2.15762	7
Olivar	Factor 6: Concejo Comunal de Organizaciones de la Sociedad Civil (COSOC)	0.500356	7
Ollagüe	Factor 6: Concejo Comunal de Organizaciones de la Sociedad Civil (COSOC)	0	7
Olmué	Factor 6: Concejo Comunal de Organizaciones de la Sociedad Civil (COSOC)	0.826696	7
Osorno	Factor 6: Concejo Comunal de Organizaciones de la Sociedad Civil (COSOC)	4.6938	7
Ovalle	Factor 6: Concejo Comunal de Organizaciones de la Sociedad Civil (COSOC)	0.500356	7
Padre Hurtado	Factor 6: Concejo Comunal de Organizaciones de la Sociedad Civil (COSOC)	1.33116	7
Padre Las Casas	Factor 6: Concejo Comunal de Organizaciones de la Sociedad Civil (COSOC)	3.02868	7
Paiguano	Factor 6: Concejo Comunal de Organizaciones de la Sociedad Civil (COSOC)	0	7
Paillaco	Factor 6: Concejo Comunal de Organizaciones de la Sociedad Civil (COSOC)	0.500356	7
Paine	Factor 6: Concejo Comunal de Organizaciones de la Sociedad Civil (COSOC)	4.6938	7
Palena	Factor 6: Concejo Comunal de Organizaciones de la Sociedad Civil (COSOC)	0.500356	7
Palmilla	Factor 6: Concejo Comunal de Organizaciones de la Sociedad Civil (COSOC)	0	7
Panguipulli	Factor 6: Concejo Comunal de Organizaciones de la Sociedad Civil (COSOC)	0	7
Panquehue	Factor 6: Concejo Comunal de Organizaciones de la Sociedad Civil (COSOC)	3.03279	7
Papudo	Factor 6: Concejo Comunal de Organizaciones de la Sociedad Civil (COSOC)	1.32705	7
Paredones	Factor 6: Concejo Comunal de Organizaciones de la Sociedad Civil (COSOC)	0.500356	7
Parral	Factor 6: Concejo Comunal de Organizaciones de la Sociedad Civil (COSOC)	4.6938	7
Pedro Aguirre Cerda	Factor 6: Concejo Comunal de Organizaciones de la Sociedad Civil (COSOC)	0.500356	7
Pelarco	Factor 6: Concejo Comunal de Organizaciones de la Sociedad Civil (COSOC)	0	7
Pelluhue	Factor 6: Concejo Comunal de Organizaciones de la Sociedad Civil (COSOC)	0	7
Pemuco	Factor 6: Concejo Comunal de Organizaciones de la Sociedad Civil (COSOC)	0	7
Pencahue	Factor 6: Concejo Comunal de Organizaciones de la Sociedad Civil (COSOC)	0	7
Penco	Factor 6: Concejo Comunal de Organizaciones de la Sociedad Civil (COSOC)	0.500356	7
Peñaflor	Factor 6: Concejo Comunal de Organizaciones de la Sociedad Civil (COSOC)	2.99194	7
Peñalolén	Factor 6: Concejo Comunal de Organizaciones de la Sociedad Civil (COSOC)	0.500356	7
Peralillo	Factor 6: Concejo Comunal de Organizaciones de la Sociedad Civil (COSOC)	0	7
Perquenco	Factor 6: Concejo Comunal de Organizaciones de la Sociedad Civil (COSOC)	2.20199	7
Petorca	Factor 6: Concejo Comunal de Organizaciones de la Sociedad Civil (COSOC)	0.500356	7
Peumo	Factor 6: Concejo Comunal de Organizaciones de la Sociedad Civil (COSOC)	0.500356	7
Pica	Factor 6: Concejo Comunal de Organizaciones de la Sociedad Civil (COSOC)	0	7
Pichidegua	Factor 6: Concejo Comunal de Organizaciones de la Sociedad Civil (COSOC)	0.500356	7
Pichilemu	Factor 6: Concejo Comunal de Organizaciones de la Sociedad Civil (COSOC)	0	7
Pinto	Factor 6: Concejo Comunal de Organizaciones de la Sociedad Civil (COSOC)	0	7
Pirque	Factor 6: Concejo Comunal de Organizaciones de la Sociedad Civil (COSOC)	0.500356	7
Pitrufquén	Factor 6: Concejo Comunal de Organizaciones de la Sociedad Civil (COSOC)	2.98432	7
Placilla	Factor 6: Concejo Comunal de Organizaciones de la Sociedad Civil (COSOC)	0	7
Portezuelo	Factor 6: Concejo Comunal de Organizaciones de la Sociedad Civil (COSOC)	0	7
Porvenir	Factor 6: Concejo Comunal de Organizaciones de la Sociedad Civil (COSOC)	0	7
Pozo Almonte	Factor 6: Concejo Comunal de Organizaciones de la Sociedad Civil (COSOC)	0.83432	7
Primavera	Factor 6: Concejo Comunal de Organizaciones de la Sociedad Civil (COSOC)	0	7
Providencia	Factor 6: Concejo Comunal de Organizaciones de la Sociedad Civil (COSOC)	4.6938	7
Puchuncaví	Factor 6: Concejo Comunal de Organizaciones de la Sociedad Civil (COSOC)	0.500356	7
Pucón	Factor 6: Concejo Comunal de Organizaciones de la Sociedad Civil (COSOC)	3.85948	7
Pudahuel	Factor 6: Concejo Comunal de Organizaciones de la Sociedad Civil (COSOC)	0	7
Puente Alto	Factor 6: Concejo Comunal de Organizaciones de la Sociedad Civil (COSOC)	0	7
Puerto Montt	Factor 6: Concejo Comunal de Organizaciones de la Sociedad Civil (COSOC)	0.500356	7
Puerto Octay	Factor 6: Concejo Comunal de Organizaciones de la Sociedad Civil (COSOC)	0	7
Puerto Varas	Factor 6: Concejo Comunal de Organizaciones de la Sociedad Civil (COSOC)	4.6938	7
Pumanque	Factor 6: Concejo Comunal de Organizaciones de la Sociedad Civil (COSOC)	0	7
Punitaqui	Factor 6: Concejo Comunal de Organizaciones de la Sociedad Civil (COSOC)	4.6938	7
Punta Arenas	Factor 6: Concejo Comunal de Organizaciones de la Sociedad Civil (COSOC)	3.03279	7
Puqueldón	Factor 6: Concejo Comunal de Organizaciones de la Sociedad Civil (COSOC)	0.500356	7
Purén	Factor 6: Concejo Comunal de Organizaciones de la Sociedad Civil (COSOC)	3.85948	7
Purranque	Factor 6: Concejo Comunal de Organizaciones de la Sociedad Civil (COSOC)	4.19345	7
Putaendo	Factor 6: Concejo Comunal de Organizaciones de la Sociedad Civil (COSOC)	0.826696	7
Putre	Factor 6: Concejo Comunal de Organizaciones de la Sociedad Civil (COSOC)	3.86734	7
Puyehue	Factor 6: Concejo Comunal de Organizaciones de la Sociedad Civil (COSOC)	0	7
Queilén	Factor 6: Concejo Comunal de Organizaciones de la Sociedad Civil (COSOC)	0.500356	7
Quellón	Factor 6: Concejo Comunal de Organizaciones de la Sociedad Civil (COSOC)	0.500356	7
Quemchi	Factor 6: Concejo Comunal de Organizaciones de la Sociedad Civil (COSOC)	0.500356	7
Quilaco	Factor 6: Concejo Comunal de Organizaciones de la Sociedad Civil (COSOC)	0	7
Quilicura	Factor 6: Concejo Comunal de Organizaciones de la Sociedad Civil (COSOC)	0.500356	7
Quilleco	Factor 6: Concejo Comunal de Organizaciones de la Sociedad Civil (COSOC)	0	7
Quillón	Factor 6: Concejo Comunal de Organizaciones de la Sociedad Civil (COSOC)	0	7
Quillota	Factor 6: Concejo Comunal de Organizaciones de la Sociedad Civil (COSOC)	2.20222	7
Quilpué	Factor 6: Concejo Comunal de Organizaciones de la Sociedad Civil (COSOC)	2.99194	7
Quinchao	Factor 6: Concejo Comunal de Organizaciones de la Sociedad Civil (COSOC)	0	7
Quinta De Tilcoco	Factor 6: Concejo Comunal de Organizaciones de la Sociedad Civil (COSOC)	0.500356	7
Quinta Normal	Factor 6: Concejo Comunal de Organizaciones de la Sociedad Civil (COSOC)	4.6938	7
Quintero	Factor 6: Concejo Comunal de Organizaciones de la Sociedad Civil (COSOC)	2.20199	7
Quirihue	Factor 6: Concejo Comunal de Organizaciones de la Sociedad Civil (COSOC)	0	7
Rancagua	Factor 6: Concejo Comunal de Organizaciones de la Sociedad Civil (COSOC)	0.500356	7
Ránquil	Factor 6: Concejo Comunal de Organizaciones de la Sociedad Civil (COSOC)	4.6938	7
Rauco	Factor 6: Concejo Comunal de Organizaciones de la Sociedad Civil (COSOC)	4.6938	7
Recoleta	Factor 6: Concejo Comunal de Organizaciones de la Sociedad Civil (COSOC)	4.6938	7
Renaico	Factor 6: Concejo Comunal de Organizaciones de la Sociedad Civil (COSOC)	2.98432	7
Renca	Factor 6: Concejo Comunal de Organizaciones de la Sociedad Civil (COSOC)	0.500356	7
Rengo	Factor 6: Concejo Comunal de Organizaciones de la Sociedad Civil (COSOC)	0	7
Requínoa	Factor 6: Concejo Comunal de Organizaciones de la Sociedad Civil (COSOC)	0.500356	7
Retiro	Factor 6: Concejo Comunal de Organizaciones de la Sociedad Civil (COSOC)	0.500356	7
Rinconada	Factor 6: Concejo Comunal de Organizaciones de la Sociedad Civil (COSOC)	3.85948	7
Río Bueno	Factor 6: Concejo Comunal de Organizaciones de la Sociedad Civil (COSOC)	0.500356	7
Río Claro	Factor 6: Concejo Comunal de Organizaciones de la Sociedad Civil (COSOC)	0.500356	7
Río Hurtado	Factor 6: Concejo Comunal de Organizaciones de la Sociedad Civil (COSOC)	0.500356	7
Río Ibáñez	Factor 6: Concejo Comunal de Organizaciones de la Sociedad Civil (COSOC)	2.15762	7
Río Negro	Factor 6: Concejo Comunal de Organizaciones de la Sociedad Civil (COSOC)	0.500356	7
Río Verde	Factor 6: Concejo Comunal de Organizaciones de la Sociedad Civil (COSOC)	1.33116	7
Romeral	Factor 6: Concejo Comunal de Organizaciones de la Sociedad Civil (COSOC)	1.6575	7
Saavedra	Factor 6: Concejo Comunal de Organizaciones de la Sociedad Civil (COSOC)	2.15762	7
Sagrada Familia	Factor 6: Concejo Comunal de Organizaciones de la Sociedad Civil (COSOC)	0	7
Salamanca	Factor 6: Concejo Comunal de Organizaciones de la Sociedad Civil (COSOC)	4.6938	7
San Antonio	Factor 6: Concejo Comunal de Organizaciones de la Sociedad Civil (COSOC)	3.03302	7
[truncated: 3,505 more rows]

## Sheet: 3. Indice Puntj Simpl Traspuest
Comuna	Dimensión	Indice Simple
Isla de Maipo	Factor 1: Información de unidades municipales y funcionarios	0.5	2
Algarrobo	Factor 1: Información de unidades municipales y funcionarios	0.833333	2
Alhué	Factor 1: Información de unidades municipales y funcionarios	0.916667	2
Alto Biobío	Factor 1: Información de unidades municipales y funcionarios	0.0833333	2
Alto Del Carmen	Factor 1: Información de unidades municipales y funcionarios	0.916667	2
Alto Hospicio	Factor 1: Información de unidades municipales y funcionarios	0	2
Ancud	Factor 1: Información de unidades municipales y funcionarios	0.916667	2
Andacollo	Factor 1: Información de unidades municipales y funcionarios	0.0833333	2
Angol	Factor 1: Información de unidades municipales y funcionarios	0.75	2
Antofagasta	Factor 1: Información de unidades municipales y funcionarios	1	2
Antuco	Factor 1: Información de unidades municipales y funcionarios	0.916667	2
Arauco	Factor 1: Información de unidades municipales y funcionarios	0.916667	2
Arica	Factor 1: Información de unidades municipales y funcionarios	0.916667	2
Aysén	Factor 1: Información de unidades municipales y funcionarios	0.916667	2
Buin	Factor 1: Información de unidades municipales y funcionarios	0.916667	2
Bulnes	Factor 1: Información de unidades municipales y funcionarios	0.833333	2
Cabildo	Factor 1: Información de unidades municipales y funcionarios	0.75	2
Cabo De Hornos	Factor 1: Información de unidades municipales y funcionarios	0.75	2
Cabrero	Factor 1: Información de unidades municipales y funcionarios	0.916667	2
Calama	Factor 1: Información de unidades municipales y funcionarios	0.166667	2
Calbuco	Factor 1: Información de unidades municipales y funcionarios	0.916667	2
Caldera	Factor 1: Información de unidades municipales y funcionarios	0.0833333	2
Calera	Factor 1: Información de unidades municipales y funcionarios	0.666667	2
Calera De Tango	Factor 1: Información de unidades municipales y funcionarios	0	2
Calle Larga	Factor 1: Información de unidades municipales y funcionarios	0.166667	2
Camarones	Factor 1: Información de unidades municipales y funcionarios	0.166667	2
Camiña	Factor 1: Información de unidades municipales y funcionarios	0.666667	2
Canela	Factor 1: Información de unidades municipales y funcionarios	0.333333	2
Cañete	Factor 1: Información de unidades municipales y funcionarios	0.916667	2
Carahue	Factor 1: Información de unidades municipales y funcionarios	0.666667	2
Cartagena	Factor 1: Información de unidades municipales y funcionarios	0.916667	2
Casablanca	Factor 1: Información de unidades municipales y funcionarios	0.916667	2
Castro	Factor 1: Información de unidades municipales y funcionarios	0.916667	2
Catemu	Factor 1: Información de unidades municipales y funcionarios	1	2
Cauquenes	Factor 1: Información de unidades municipales y funcionarios	0.0833333	2
Cerrillos	Factor 1: Información de unidades municipales y funcionarios	1	2
Cerro Navia	Factor 1: Información de unidades municipales y funcionarios	0.916667	2
Chaitén	Factor 1: Información de unidades municipales y funcionarios	0.0833333	2
Chanco	Factor 1: Información de unidades municipales y funcionarios	0.916667	2
Chañaral	Factor 1: Información de unidades municipales y funcionarios	0.916667	2
Chépica	Factor 1: Información de unidades municipales y funcionarios	0.833333	2
Chiguayante	Factor 1: Información de unidades municipales y funcionarios	0.916667	2
Chile Chico	Factor 1: Información de unidades municipales y funcionarios	0.0833333	2
Chillán	Factor 1: Información de unidades municipales y funcionarios	0.916667	2
Chillán Viejo	Factor 1: Información de unidades municipales y funcionarios	0.0833333	2
Chimbarongo	Factor 1: Información de unidades municipales y funcionarios	0.916667	2
Cholchol	Factor 1: Información de unidades municipales y funcionarios	0.666667	2
Chonchi	Factor 1: Información de unidades municipales y funcionarios	0.916667	2
Cisnes	Factor 1: Información de unidades municipales y funcionarios	0.166667	2
Cobquecura	Factor 1: Información de unidades municipales y funcionarios	0.0833333	2
Cochamó	Factor 1: Información de unidades municipales y funcionarios	0.916667	2
Cochrane	Factor 1: Información de unidades municipales y funcionarios	0.583333	2
Codegua	Factor 1: Información de unidades municipales y funcionarios	0.916667	2
Coelemu	Factor 1: Información de unidades municipales y funcionarios	0.0833333	2
Coihueco	Factor 1: Información de unidades municipales y funcionarios	0.0833333	2
Coinco	Factor 1: Información de unidades municipales y funcionarios	0.916667	2
Colbún	Factor 1: Información de unidades municipales y funcionarios	1	2
Colchane	Factor 1: Información de unidades municipales y funcionarios	0.916667	2
Colina	Factor 1: Información de unidades municipales y funcionarios	0.916667	2
Collipulli	Factor 1: Información de unidades municipales y funcionarios	0.916667	2
Coltauco	Factor 1: Información de unidades municipales y funcionarios	0.916667	2
Combarbalá	Factor 1: Información de unidades municipales y funcionarios	0.0833333	2
Concepción	Factor 1: Información de unidades municipales y funcionarios	0.916667	2
Conchalí	Factor 1: Información de unidades municipales y funcionarios	0.833333	2
Concón	Factor 1: Información de unidades municipales y funcionarios	0.666667	2
Constitución	Factor 1: Información de unidades municipales y funcionarios	0	2
Contulmo	Factor 1: Información de unidades municipales y funcionarios	0.583333	2
Copiapó	Factor 1: Información de unidades municipales y funcionarios	0	2
Coquimbo	Factor 1: Información de unidades municipales y funcionarios	0.916667	2
Coronel	Factor 1: Información de unidades municipales y funcionarios	0.916667	2
Corral	Factor 1: Información de unidades municipales y funcionarios	0.5	2
Coyhaique	Factor 1: Información de unidades municipales y funcionarios	1	2
Cunco	Factor 1: Información de unidades municipales y funcionarios	1	2
Curacautín	Factor 1: Información de unidades municipales y funcionarios	0.916667	2
Curacaví	Factor 1: Información de unidades municipales y funcionarios	0.916667	2
Curaco De Vélez	Factor 1: Información de unidades municipales y funcionarios	0.416667	2
Curanilahue	Factor 1: Información de unidades municipales y funcionarios	0.916667	2
Curarrehue	Factor 1: Información de unidades municipales y funcionarios	0.75	2
Curepto	Factor 1: Información de unidades municipales y funcionarios	0.916667	2
Curicó	Factor 1: Información de unidades municipales y funcionarios	0.916667	2
Dalcahue	Factor 1: Información de unidades municipales y funcionarios	0.916667	2
Diego De Almagro	Factor 1: Información de unidades municipales y funcionarios	0.916667	2
Doñihue	Factor 1: Información de unidades municipales y funcionarios	0.916667	2
El Bosque	Factor 1: Información de unidades municipales y funcionarios	1	2
El Carmen	Factor 1: Información de unidades municipales y funcionarios	0.0833333	2
El Monte	Factor 1: Información de unidades municipales y funcionarios	0.916667	2
El Quisco	Factor 1: Información de unidades municipales y funcionarios	0.916667	2
El Tabo	Factor 1: Información de unidades municipales y funcionarios	0.833333	2
Empedrado	Factor 1: Información de unidades municipales y funcionarios	0.916667	2
Ercilla	Factor 1: Información de unidades municipales y funcionarios	0.583333	2
Estación Central	Factor 1: Información de unidades municipales y funcionarios	1	2
Florida	Factor 1: Información de unidades municipales y funcionarios	0.916667	2
Freire	Factor 1: Información de unidades municipales y funcionarios	0.666667	2
Freirina	Factor 1: Información de unidades municipales y funcionarios	0	2
Fresia	Factor 1: Información de unidades municipales y funcionarios	0.916667	2
Frutillar	Factor 1: Información de unidades municipales y funcionarios	0.916667	2
Futaleufú	Factor 1: Información de unidades municipales y funcionarios	0.916667	2
Futrono	Factor 1: Información de unidades municipales y funcionarios	0.833333	2
Galvarino	Factor 1: Información de unidades municipales y funcionarios	0.666667	2
General Lagos	Factor 1: Información de unidades municipales y funcionarios	0.0833333	2
Gorbea	Factor 1: Información de unidades municipales y funcionarios	0.666667	2
Graneros	Factor 1: Información de unidades municipales y funcionarios	0.916667	2
Guaitecas	Factor 1: Información de unidades municipales y funcionarios	0.75	2
Hijuelas	Factor 1: Información de unidades municipales y funcionarios	0.916667	2
Hualaihué	Factor 1: Información de unidades municipales y funcionarios	0.833333	2
Hualañé	Factor 1: Información de unidades municipales y funcionarios	0.916667	2
Hualpén	Factor 1: Información de unidades municipales y funcionarios	0.833333	2
Hualqui	Factor 1: Información de unidades municipales y funcionarios	0.916667	2
Huara	Factor 1: Información de unidades municipales y funcionarios	0.0833333	2
Huasco	Factor 1: Información de unidades municipales y funcionarios	0.0833333	2
Huechuraba	Factor 1: Información de unidades municipales y funcionarios	0.916667	2
Illapel	Factor 1: Información de unidades municipales y funcionarios	0.0833333	2
Independencia	Factor 1: Información de unidades municipales y funcionarios	0.916667	2
Iquique	Factor 1: Información de unidades municipales y funcionarios	0.916667	2
Juan Fernández	Factor 1: Información de unidades municipales y funcionarios	0.666667	2
La Cisterna	Factor 1: Información de unidades municipales y funcionarios	0.916667	2
La Cruz	Factor 1: Información de unidades municipales y funcionarios	0.666667	2
La Estrella	Factor 1: Información de unidades municipales y funcionarios	0.916667	2
La Florida	Factor 1: Información de unidades municipales y funcionarios	0.916667	2
La Granja	Factor 1: Información de unidades municipales y funcionarios	0.916667	2
La Higuera	Factor 1: Información de unidades municipales y funcionarios	0	2
La Ligua	Factor 1: Información de unidades municipales y funcionarios	0.916667	2
La Pintana	Factor 1: Información de unidades municipales y funcionarios	1	2
La Reina	Factor 1: Información de unidades municipales y funcionarios	0.916667	2
La Serena	Factor 1: Información de unidades municipales y funcionarios	0.833333	2
La Unión	Factor 1: Información de unidades municipales y funcionarios	0.916667	2
Lago Ranco	Factor 1: Información de unidades municipales y funcionarios	0.916667	2
Lago Verde	Factor 1: Información de unidades municipales y funcionarios	0.833333	2
Laguna Blanca	Factor 1: Información de unidades municipales y funcionarios	0.583333	2
Laja	Factor 1: Información de unidades municipales y funcionarios	0.833333	2
Lampa	Factor 1: Información de unidades municipales y funcionarios	0.0833333	2
Lanco	Factor 1: Información de unidades municipales y funcionarios	0.0833333	2
Las Cabras	Factor 1: Información de unidades municipales y funcionarios	0.916667	2
Las Condes	Factor 1: Información de unidades municipales y funcionarios	0.916667	2
Lautaro	Factor 1: Información de unidades municipales y funcionarios	0.916667	2
Lebu	Factor 1: Información de unidades municipales y funcionarios	0.916667	2
Licantén	Factor 1: Información de unidades municipales y funcionarios	0.916667	2
Limache	Factor 1: Información de unidades municipales y funcionarios	0.75	2
[truncated: 6,054 more rows]

## Sheet: 4. Indice Puntj CF NormTraspest
Comuna	Dimensión	Indice Simple
[truncated: 5,848 more rows]

[truncated: 2 more sheets: Cargas Factoriales, Dimensiones]
