# Supplementary material for: Introducing the municipal digital offering index for evaluating online services and addressing the digital divide
Source: PeerJ Comput Sci. 2025 Sep 3;11:e3049. doi: 10.7717/peerj-cs.3049 (PMC12453795; doi:10.7717/peerj-cs.3049)
Supplement: Supplemental Information 6 [file peerj-cs-11-3049-s006.xlsx]

## Sheet: Base sin Vacios (Database)
Variables (Spanish)	Categorías	Variables (English)	Categories
Región	yes	Region	yes
Provincia	yes	Province	yes
Comuna	yes	Minicipality	yes
Número de región	número	Region Number	numeric
Zona	norte, centro, sur	Zone	north, center, south
Indice_5	número	MDOI index	numeric
Tamaño	número	Size	numeric
Cantidad_Poblacional	número	Population Quantity	numeric
%_POBREZA_POR_INGRESO	número	%_INCOME_POVERTY	numeric
%_POBLACIÓN_URBANA	número	%_URBAN_POPULATION	numeric
%_SIN_ESCOLARIDAD	número	%_WITHOUT_SCHOOLING	numeric
%_BÁSICA	número	%_PRIMARY	numeric
%_MEDIA	número	%_SECONDARY	numeric
%_SUPERIOR	número	%_TERTIARY	numeric
%_NIVEL_IGNORADO	número	%_UNKNOWN_LEVEL	numeric
BIENESTAR	número	WELL-BEING	numeric
ECONOMÍA	número	ECONOMY	numeric
EDUCACIÓN	número	EDUCATION	numeric
IDC	número	CDI: Municipal Community Development Index	numeric
Porcentaje de Ejecución Presupuestaria Devengada Municipal (2021)	número	Municipal Accrued Budget Execution Percentage (2021)	numeric
Eficiencia Cobro Patentes Municipales en %	número	Municipal Patent Collection Efficiency in %	numeric
Gastos en Personal Municipal (M$)	número	Municipal Personnel Expenses (M$)	numeric
Gastos Municipales (Gastos Total Devengado) (M$)	número	Municipal Expenses (Total Accrued Expenses) (M$)	numeric
Disponibilidad Presupuestaria Municipal por Habitante en M$	número	Municipal Budget Availability per Inhabitant in M$	numeric
Ingresos Municipales (Ingreso Total Percibido) en M$	número	Municipal Revenues (Total Received Income) in M$	numeric
Ingresos por Impuestos en M$	número	Tax Revenues in M$	numeric
Ingresos por Patentes Municipales de Beneficio Municipal en M$	número	Municipal Benefit Patent Revenues in M$	numeric
Ingresos por Permisos de Circulación de Beneficio Municipal en M$	número	Municipal Benefit Vehicle Permit Revenues in M$	numeric
Ingresos por Fondo Común Municipal en M$	número	Common Municipal Fund Revenues in M$	numeric
Nº de Permisos de Edificación Entregados	número	Number of Building Permits Issued	numeric
N° de Permisos de edificación entregados al nivel regional	número	Number of Building Permits Issued at the Regional Level	numeric
Disponibilidad presupuestaria municipal por habitante en M$ al nivel regional	número	Municipal Budget Availability per Inhabitant in M$ at the Regional Level	numeric

## Sheet: Regiones (Regions)
Variables (Spanish)	Categorías	Variables (English)	Categories
Etiquetas de fila	yes	Row Labels	yes
Suma de Nº de Permisos de Edificación Entregados	número	Sum of Number of Building Permits Issued	numeric
Suma de Disponibilidad Presupuestaria Municipal por Habitante en M$	número	Sum of Municipal Budget Availability per Inhabitant in M$	numeric
Promedio de Indice_5	número	Average of Index_5	numeric
Suma de Tamaño	número	Sum of Size	numeric
Suma de Cantidad_Poblacional	número	Sum of Population Quantity	numeric
Promedio de %_POBREZA_POR_INGRESO	número	Average of %_INCOME_POVERTY	numeric
Promedio de Densidad_Poblacional	número	Average of Population Density	numeric
Promedio de %_POBLACIÓN_URBANA	número	Average of %_URBAN_POPULATION	numeric
Promedio de %_SIN_ESCOLARIDAD	número	Average of %_WITHOUT_SCHOOLING	numeric
Promedio de %_BÁSICA	número	Average of %_PRIMARY	numeric
Promedio de %_MEDIA	número	Average of %_SECONDARY	numeric
Promedio de %_SUPERIOR	número	Average of %_TERTIARY	numeric
Promedio de BIENESTAR	número	Average of WELL-BEING	numeric
Promedio de ECONOMÍA	número	Average of ECONOMY	numeric
Promedio de EDUCACIÓN	número	Average of EDUCATION	numeric
Promedio de IDC	número	Average of IDC	numeric
Promedio de Porcentaje de Ejecución Presupuestaria Devengada Municipal (2021)	número	Average of Municipal Accrued Budget Execution Percentage (2021)	numeric
Promedio de Eficiencia Cobro Patentes Municipales en %	número	Average of Municipal Patent Collection Efficiency in %	numeric
Suma de Gastos en Personal Municipal (M$)	número	Sum of Municipal Personnel Expenses (M$)	numeric
Suma de Gastos Municipales (Gastos Total Devengado) (M$)	número	Sum of Municipal Expenses (Total Accrued Expenses) (M$)	numeric
Suma de Ingresos Municipales (Ingreso Total Percibido) en M$	número	Sum of Municipal Revenues (Total Received Income) in M$	numeric
Suma de Ingresos por Impuestos en M$	número	Sum of Tax Revenues in M$	numeric
Suma de Ingresos por Patentes Municipales de Beneficio Municipal en M$	número	Sum of Municipal Benefit Patent Revenues in M$	numeric
Suma de Ingresos por Permisos de Circulación de Beneficio Municipal en M$	número	Sum of Municipal Benefit Vehicle Permit Revenues in M$	numeric
Suma de Ingresos por Fondo Común Municipal en M$	número	Sum of Common Municipal Fund Revenues in M$	numeric
